# Supplementary material for: Genome-Wide Analysis of Stress-Responsive Genes and Alternative Splice Variants in Arabidopsis Roots under Osmotic Stresses
Source: MDPI journal article supplement (doi:10.3390/ijms241914580), 2023-09-26
Supplement: s1 [file s1]

## Supplementary data

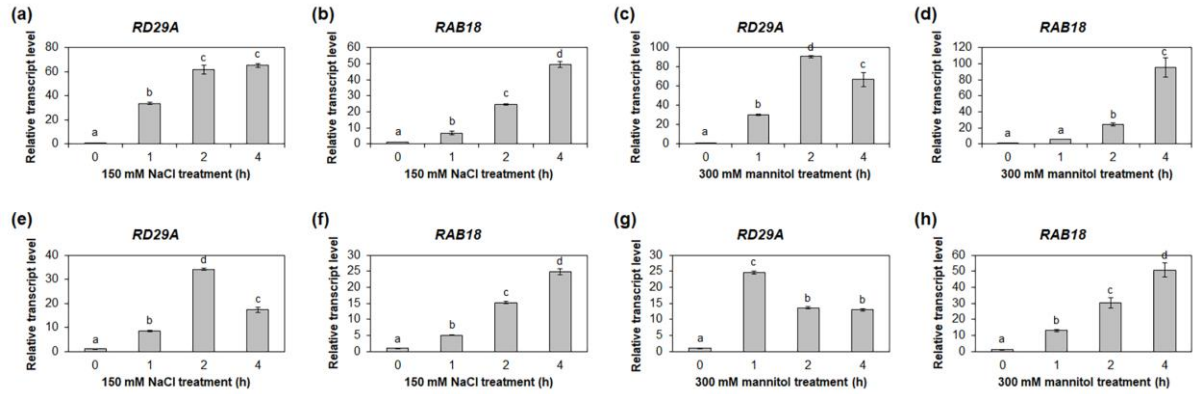

**Figure S1.** Expression analysis of osmotic stress-responsive marker genes. Quantitative RT-PCR analysis of *RD29A* and *RAB18* in whole seedlings (a–d) and in roots (e–h) under 150 mM NaCl or 300 mM mannitol treatment for 0, 1, 2, and 4 h. *GAPc* was used as an internal control. Transcript levels at 0 h were set as 1. Three biological replicates were performed with two technical replicates for each biological replicate. Three independent reactions were performed for each technical replicate. Error bars represent standard deviation ( $n = 6$  reactions). Different letters indicate statistically significant differences ( $p < 0.05$ ).

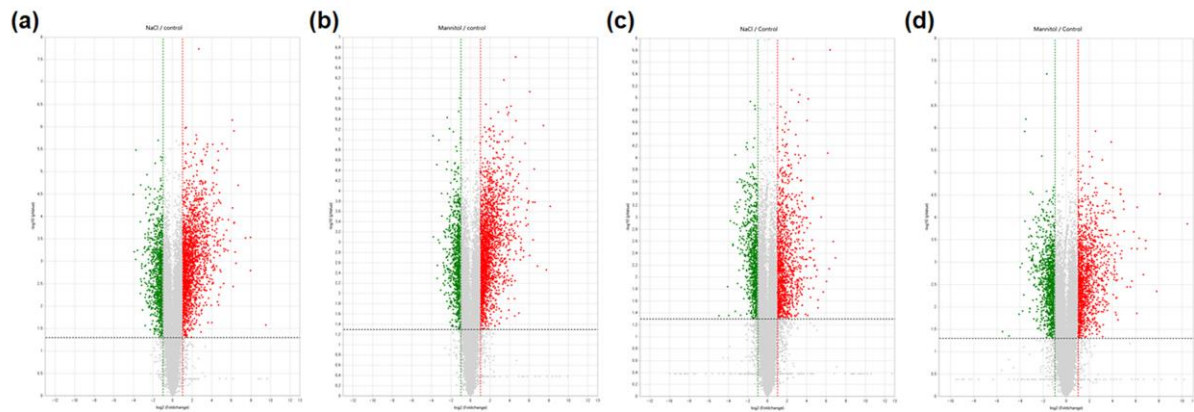

**Figure S2.** Volcano plot of differentially expressed genes (DEGs) under osmotic stress conditions. **(a)** DEGs in roots under NaCl treatment. **(b)** DEGs in roots under mannitol treatment. **(c)** DEGs in whole seedlings under NaCl treatment. **(d)** DEGs in whole seedlings under mannitol treatment. Red dots and green dots represent upregulated genes and downregulated genes, respectively. Grey dots indicate genes that are not differentially expressed. DEGs were selected by  $FDR < 0.05$  and  $\log_2 \text{ratio} \geq 1$  or  $\leq -1$  condition. Volcano plots were visualized using ExDEGA.

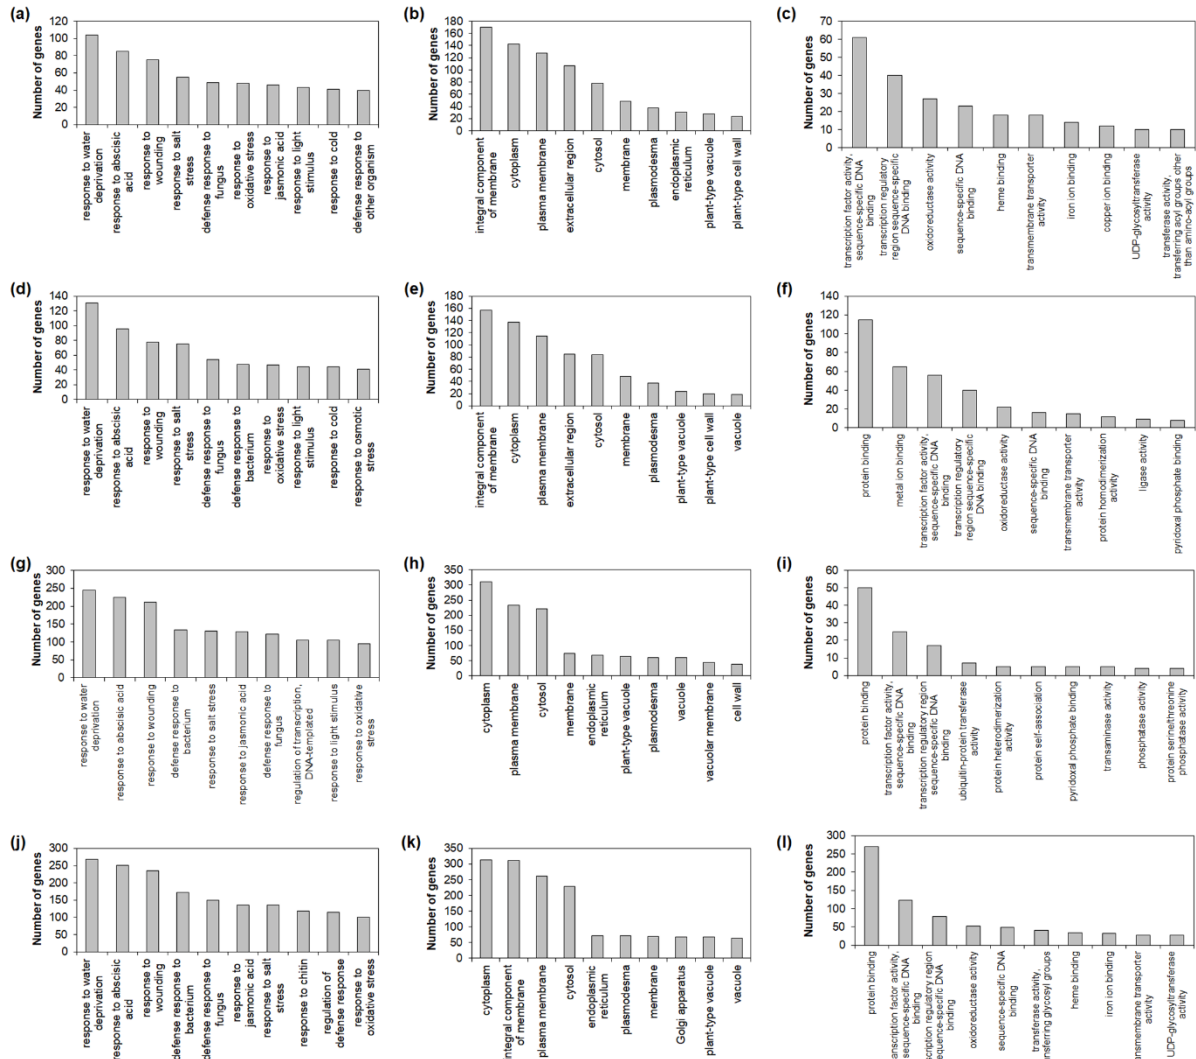

**Figure S3.** Enriched gene ontology (GO) terms of upregulated genes in roots and in whole seedlings under salt and drought stress conditions. **(a–c)** Enriched Biological Process (BP) **(a)**, Molecular Function (MF) **(b)**, and Cellular Component (CC) **(c)** of upregulated genes in roots under NaCl treatment. **(d–f)** Enriched BP **(d)**, MF **(e)**, and CC **(f)** of upregulated genes in roots under mannitol treatment. **(g–i)** Enriched BP **(g)**, MF **(h)**, and CC **(i)** of upregulated genes in whole seedlings under NaCl treatment. **(j–l)** Enriched BP **(j)**, MF **(k)**, and CC **(l)** of upregulated genes in whole seedlings under mannitol treatment. GO annotation enrichment was performed using DAVID. Enriched GO terms were selected by  $p < 0.05$ .

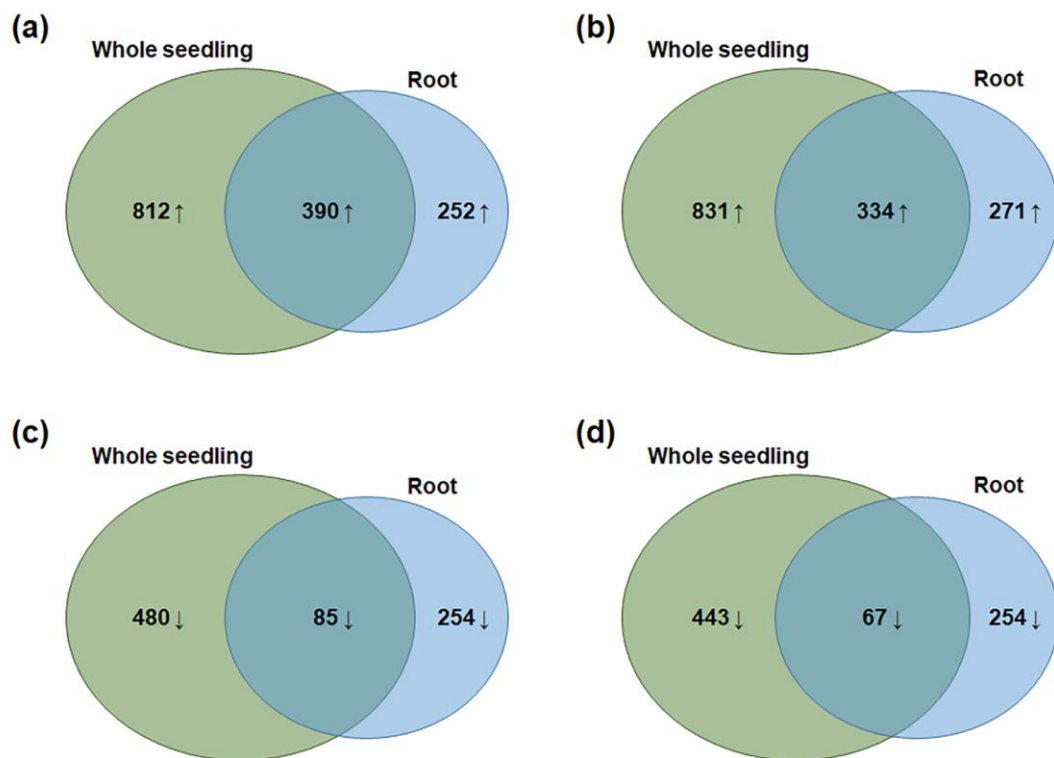

**Figure S4.** Venn diagrams of DEGs in whole seedlings and in roots. **(a)** Venn diagram of upregulated genes in whole seedlings and in roots under NaCl treatment. **(b)** Venn diagram of upregulated genes in whole seedlings and in roots under mannitol treatment. **(c)** Venn diagram of downregulated genes in whole seedlings and in roots under NaCl treatment. **(d)** Venn diagram of downregulated genes in whole seedlings and in roots under mannitol treatment. DEGs were selected by  $FDR < 0.05$  and  $\log_2 \text{ratio} \geq 1$  or  $\leq -1$  condition.

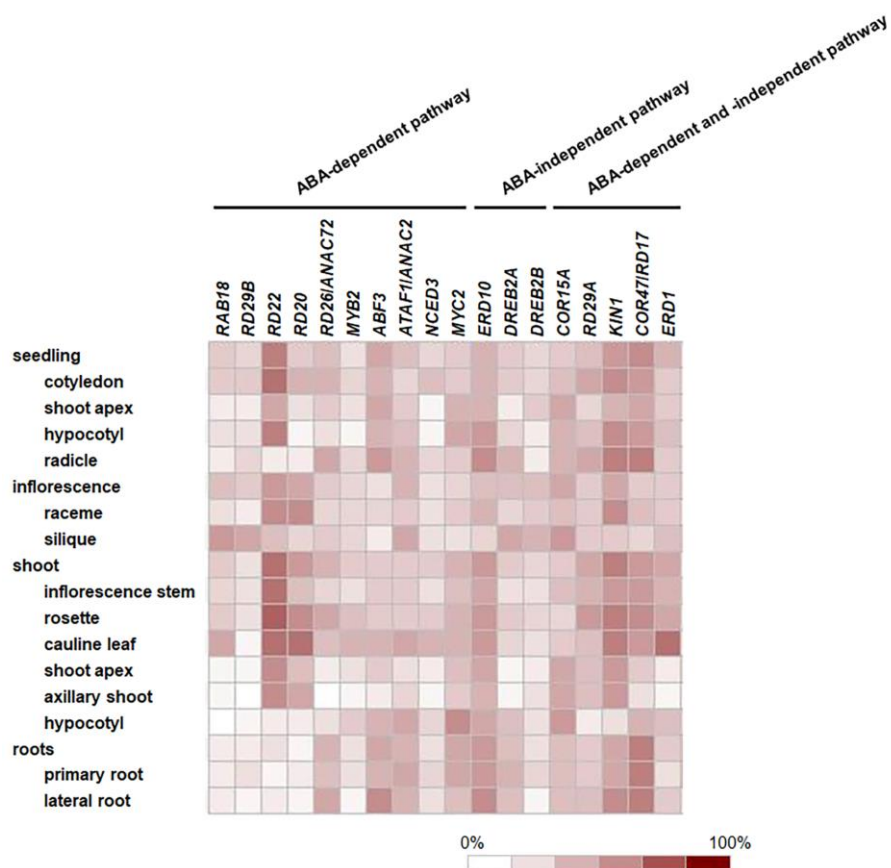

**Figure S5.** Heatmap analysis of the ABA-dependent and -independent genes in Arabidopsis organs using Genevestigator. Genevestigator analysis was performed by organism as *Arabidopsis thaliana*, platform as Affymetrix Arabidopsis ATH1 Genome Array, and condition search tool as Anatomy.

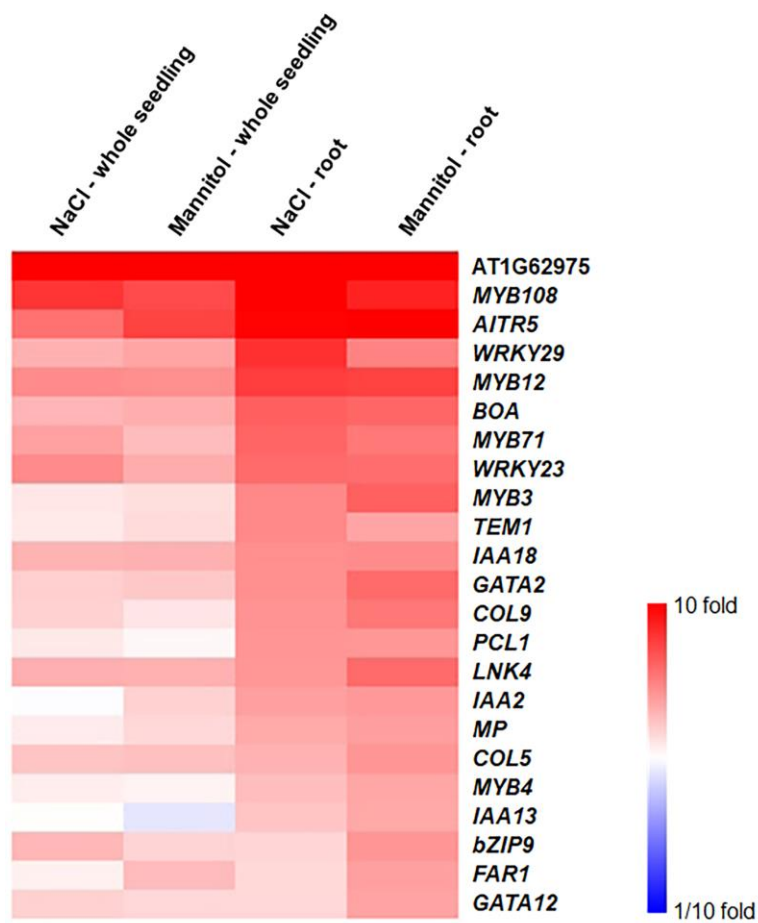

**Figure S6.** Expression of transcription factor genes upregulated under osmotic stress conditions in roots. Expression of transcription factor genes upregulated in roots were visualized using MeV. MeV was performed by Two-color Array, Load annotation data as Automatically download, and organism as *Arabidopsis thaliana*.

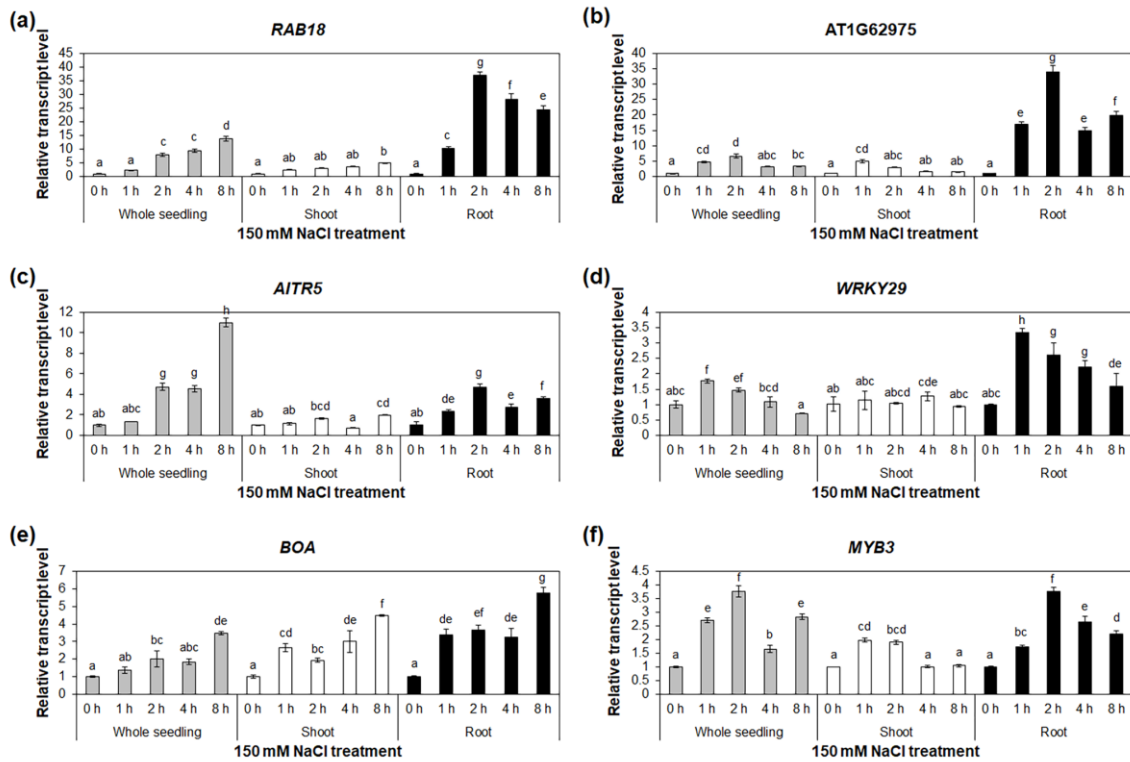

**Figure S7.** Expression analysis of salt stress-responsive transcription factor gene. Quantitative RT-PCR analysis of *RAB18* (a), *AT1G62975* (b), *AITR5* (c), *WRKY29* (d), *BOA* (e), and *MYB3* (f) in whole seedlings, shoots, and roots under 150 mM NaCl treatment for 0, 1, 2, 4, and 8 h. *GAPc* was used as an internal control. Transcript levels at 0 h in whole seedlings, shoots, or roots were set as 1. Three biological replicates were performed with two technical replicate for each biological replicate. Three independent reactions were performed for each technical replicate. Error bars represent standard deviation ( $n = 6$  reactions). Different letters indicate statistically significant differences ( $p < 0.05$ ).

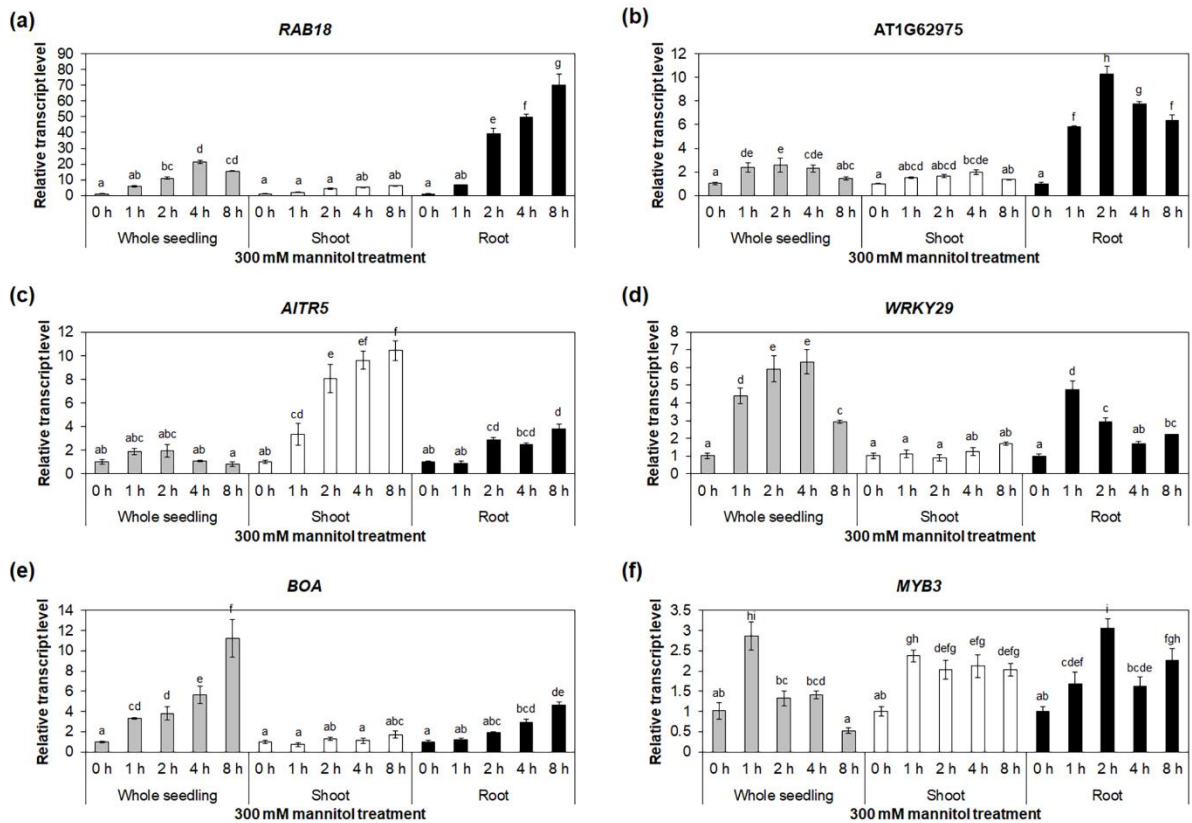

**Figure S8.** Expression analysis of drought stress-responsive transcription factor gene. Quantitative RT-PCR analysis of *RAB18* (a), *AT1G62975* (b), *AITR5* (c), *WRKY29* (d), *BOA* (e), and *MYB3* (f) in whole seedlings, shoots, and roots under 300 mM mannitol treatment for 0, 1, 2, 4, and 8 h. *GAPc* was used as an internal control. Transcript levels at 0 h in whole seedlings, shoots, or roots were set as 1. Two biological replicates were performed with two technical replicate for each biological replicate. Three independent reactions were performed for each technical replicate. Error bars represent standard deviation ( $n = 4$  reactions). Different letters indicate statistically significant differences ( $p < 0.05$ ).



(a) Interaction viewer: AT1G62975

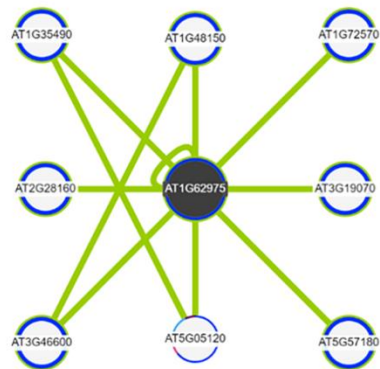

This image was generated with the Interaction viewer at [bar.utoronto.ca/epplant](http://bar.utoronto.ca/epplant) by Waele et al. 2017

**Figure S9.** Protein-protein or protein-DNA interactions of osmotic stress-responsive transcription factor genes using BAR analysis. BAR analysis was performed using Interaction viewer in ePlant.

(b) Interaction viewer: AT3G06490 / AtMYB108, BOS1, MYB108

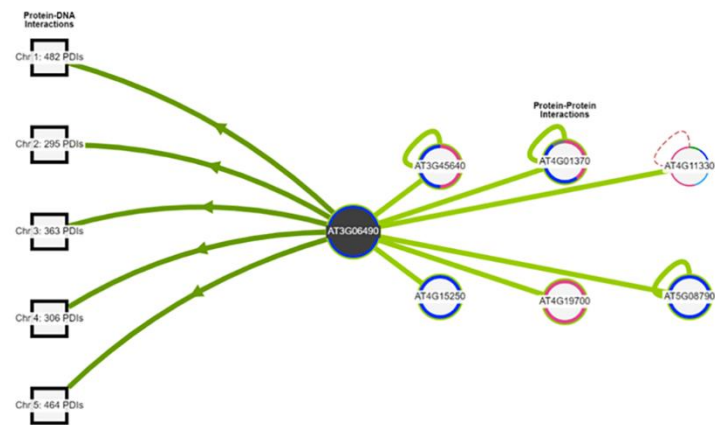

This image was generated with the Interaction viewer at bar.utoronto.ca/iplant by Waese et al. 2017

**Figure S9.** Continued.

(c) Interaction viewer: AT5G50360 / AITR5, DIG2  
Recursive interactions not shown

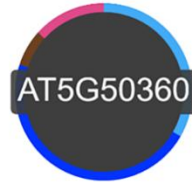

No interactions found for this gene.

This image was generated with the Interaction viewer at [bar.utoronto.ca/plant](http://bar.utoronto.ca/plant) by Waese et al. 2017

**Figure S9.** Continued.

(d) Interaction viewer: AT4G23550 / ATWRKY29, WRKY29  
Recursive interactions not shown

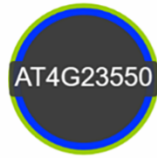

No interactions found for this gene.

This image was generated with the interaction viewer at [bar.utoronto.ca/keplant](http://bar.utoronto.ca/keplant) by Wiense et al. 2017

**Figure S9.** Continued.

(e) Interaction viewer: AT2G47460 / ATMYB12, MYB12, PFG1

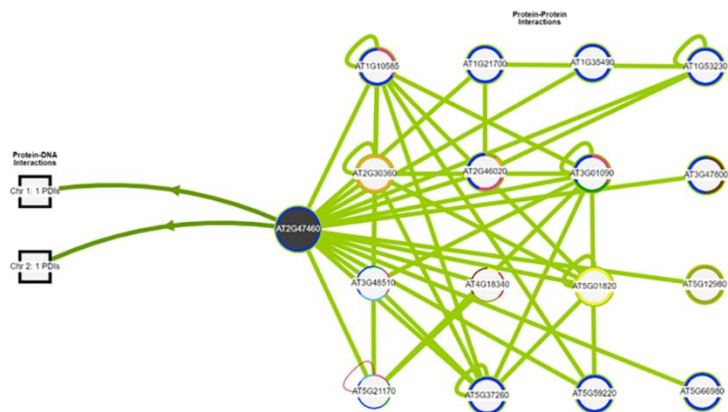

This image was generated with the Interaction viewer at [bar.utoronto.ca/repaint](http://bar.utoronto.ca/repaint) by Waele et al. 2017

**Figure S9.** Continued.

(f) Interaction viewer: AT5G59570 / BOA

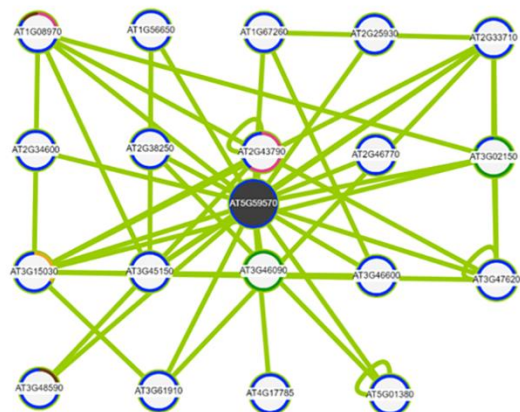

This image was generated with the Interaction viewer at bar.utoronto.ca/plant by Waese et al. 2017

**Figure S9.** Continued.

(g) Interaction viewer: AT3G24310 / ATMYB71, MYB305

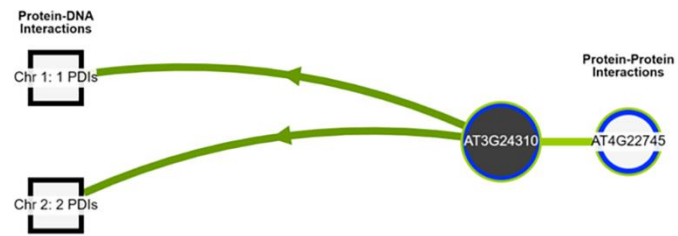

This image was generated with the Interaction viewer at [bar.utoronto.ca/epplant](http://bar.utoronto.ca/epplant) by Waeche et al. 2017

**Figure S9.** Continued.

(h) Interaction viewer: AT2G47260 / ATWRKY23, WRKY23

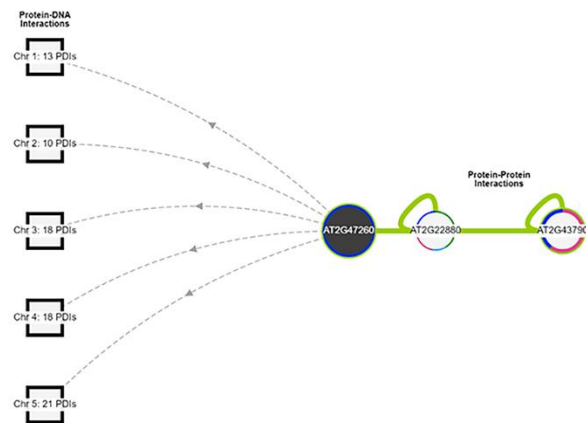

This image was generated with the Interaction viewer at [bar.utoronto.ca/leptant](http://bar.utoronto.ca/leptant) by Waese et al. 2017

**Figure S9.** Continued.



(i) Interaction viewer: AT1G22640 / ATMYB3, MYB3

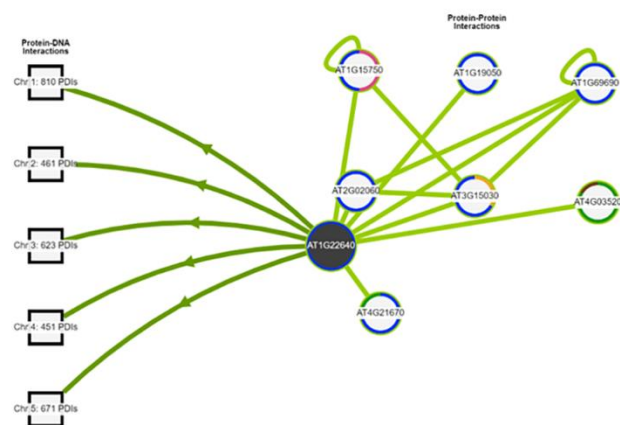

This image was generated with the Interaction viewer at [bar.utoronto.ca/epplant](http://bar.utoronto.ca/epplant) by Waele et al. 2017

**Figure S9.** Continued.

(j) Interaction viewer: AT1G25560 / AtTEM1, EDF1, TEM1

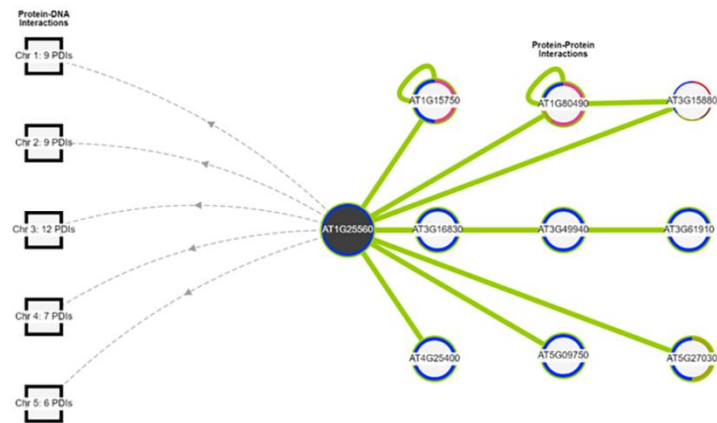

This image was generated with the interaction viewer at [bar.utoronto.ca/leplant](http://bar.utoronto.ca/leplant) by Waese et al. 2017

**Figure S9.** Continued.

(k) Interaction viewer: AT1G51950 / IAA18

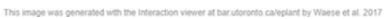

**Figure S9. Continued.**

(I) Interaction viewer: AT2G45050 / GATA2  
Recursive interactions not shown

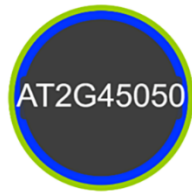

No interactions found for this gene.

This image was generated with the Interaction viewer at bar.utoronto.ca/leptant by Waese et al. 2017

**Figure S9.** Continued.

(m) Interaction viewer: AT3G07650 / BBX7, COL9

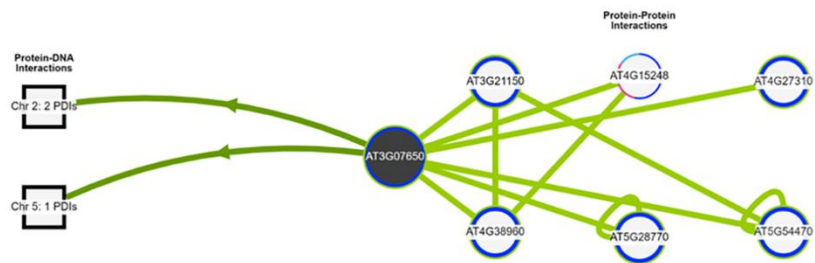

This image was generated with the Interaction viewer at [bar.utoronto.ca/leplant](http://bar.utoronto.ca/leplant) by Waele et al. 2017

**Figure S9.** Continued.

(n) Interaction viewer: AT3G46640 / LUX, PCL1

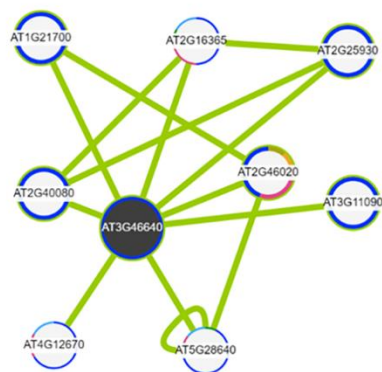

This image was generated with the Interaction viewer at [bar.utoronto.ca/leplant](http://bar.utoronto.ca/leplant) by Waese et al. 2017

**Figure S9.** Continued.

(o) Interaction viewer: AT5G06980 / LNK4  
Recursive interactions not shown

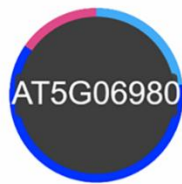

No interactions found for this gene.

This image was generated with the interaction viewer at [bar.utoronto.ca/ekplant](http://bar.utoronto.ca/ekplant) by Waece et al. 2017

**Figure S9.** Continued.

(p) Interaction viewer: AT3G23030 / IAA2

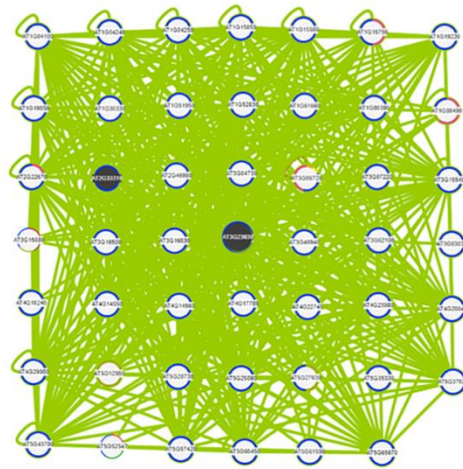

This image was generated with the Interaction viewer at bar.utoronto.ca/leplant by Waese et al. 2017

**Figure S9.** Continued.



(q) Interaction viewer: AT1G19850 / ARF5, IAA24, MP

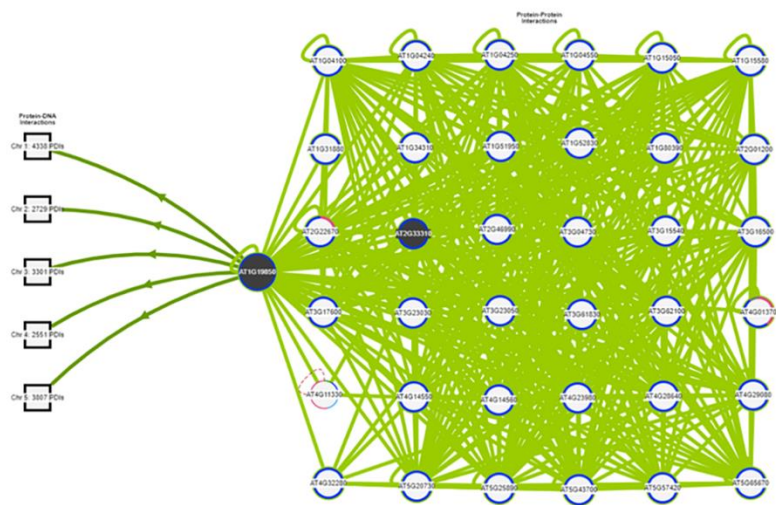

This image was generated with the Interaction viewer at [bar.utoronto.ca/eliplant](http://bar.utoronto.ca/eliplant) by Waese et al. 2017

**Figure S9. Continued.**

(r) Interaction viewer: AT5G57660 / ATCOL5, BBX6, COL5

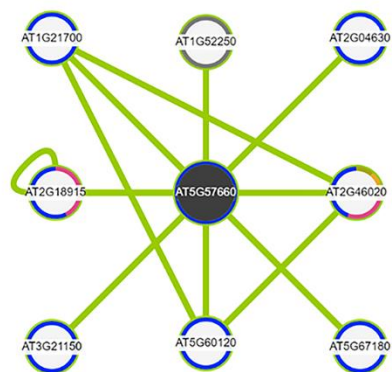

This image was generated with the Interaction viewer at [bar.utoronto.ca/leplant](http://bar.utoronto.ca/leplant) by Waese et al. 2017

**Figure S9.** Continued.

(s) Interaction viewer: AT4G38620 / ATMYB4, MYB4

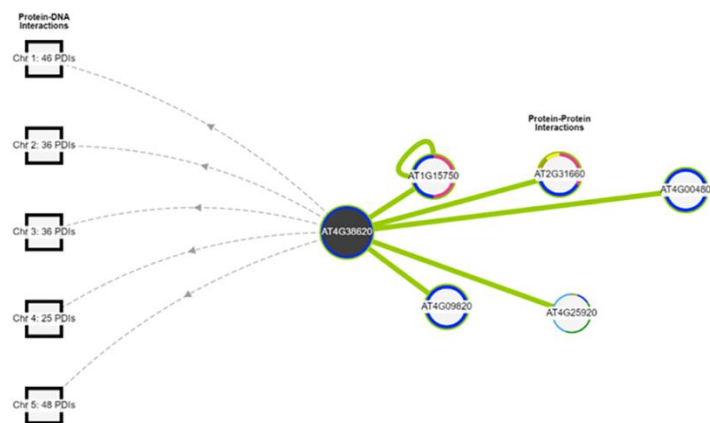

This image was generated with the Interaction viewer at [bar.utoronto.ca/plant/](http://bar.utoronto.ca/plant/) by Wasse et al. 2017

**Figure S9.** Continued.

(t) Interaction viewer: AT2G33310 / IAA13

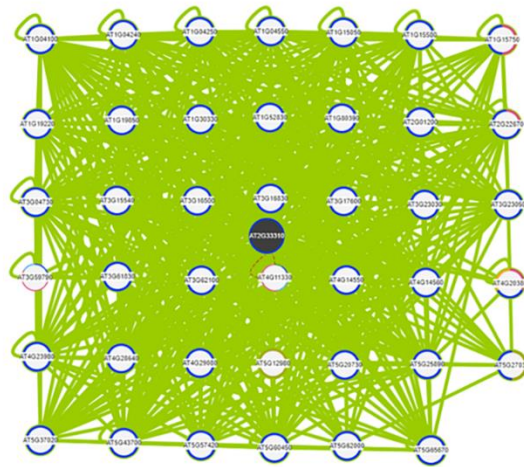

This image was generated with the Interaction viewer at [bar.utoronto.ca/leplant](http://bar.utoronto.ca/leplant) by Waese et al. 2017

**Figure S9.** Continued.

(u) Interaction viewer: AT5G24800 / ATBZIP9, BZIP9, BZO2H2

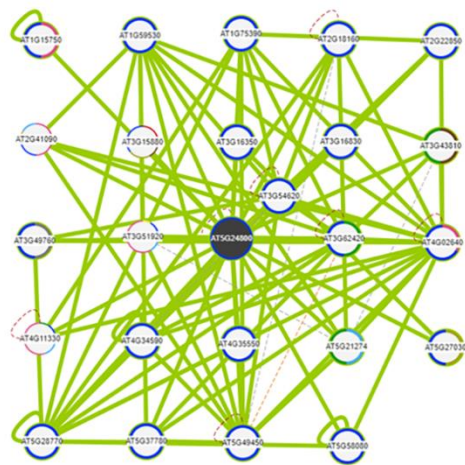

This image was generated with the Interaction viewer at [bar.utoronto.ca/iplant](http://bar.utoronto.ca/iplant) by Waele et al. 2017

**Figure S9.** Continued.

(v) Interaction viewer: AT4G15090 / FAR1

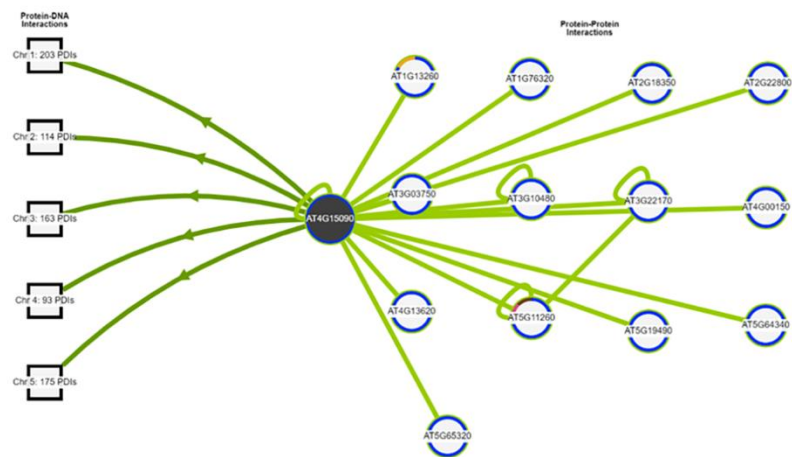

This image was generated with the Interaction viewer at bar.utoronto.ca/plant by Waese et al. 2017

**Figure S9.** Continued.

(w) Interaction viewer: AT5G25830 / GATA12  
Recursive interactions not shown

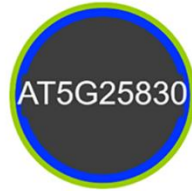

No interactions found for this gene.

This image was generated with the Interaction viewer at [bar.utoronto.ca/iplant](http://bar.utoronto.ca/iplant) by Waele et al. 2017

**Figure S9.** Continued.

**Table S1.** Suitability of RNA-Sequencing data

| Sample                    | Forward reads       |                      | Reverse reads |            | Mapping rate | Aligned pairs <sup>3)</sup> | Alignment rate |
|---------------------------|---------------------|----------------------|---------------|------------|--------------|-----------------------------|----------------|
|                           | Input <sup>1)</sup> | Mapped <sup>2)</sup> | Input         | Mapped     |              |                             |                |
| Control-whole seedling-1  | 42,039,414          | 41,208,192           | 42,039,414    | 40,795,349 | 97.5%        | 40,607,375                  | 95.2%          |
| Control-whole seedling-2  | 51,274,070          | 50,296,108           | 51,274,070    | 50,013,253 | 97.8%        | 49,770,103                  | 95.9%          |
| NaCl-whole seedling-1     | 51,728,163          | 50,850,513           | 51,728,163    | 50,516,856 | 98.0%        | 50,296,652                  | 95.6%          |
| NaCl-whole seedling-2     | 40,467,884          | 39,711,572           | 40,467,884    | 39,455,868 | 97.8%        | 39,275,051                  | 95.6%          |
| Mannitol-whole seedling-1 | 37,679,643          | 36,954,300           | 37,679,643    | 36,664,941 | 97.7%        | 36,498,403                  | 95.3%          |
| Mannitol-whole seedling-2 | 42,635,498          | 41,796,846           | 42,635,498    | 41,540,374 | 97.7%        | 41,351,177                  | 95.4%          |
| Control-root-1            | 30,699,480          | 30,091,441           | 30,699,480    | 29,954,951 | 97.8%        | 29,818,149                  | 95.3%          |
| Control-root-2            | 30,259,403          | 29,502,958           | 30,259,403    | 29,435,456 | 97.4%        | 29,291,630                  | 94.6%          |
| NaCl-root-1               | 30,646,933          | 30,058,038           | 30,646,933    | 30,009,796 | 98.0%        | 29,853,487                  | 95.3%          |
| NaCl-root-2               | 30,355,441          | 27,486,159           | 30,355,441    | 27,301,458 | 90.2%        | 27,136,922                  | 88.1%          |
| Mannitol-root-1           | 30,418,358          | 29,837,792           | 30,418,358    | 29,763,872 | 98.0%        | 29,623,999                  | 95.9%          |
| Mannitol-root-2           | 30,633,300          | 29,664,265           | 30,633,300    | 29,579,245 | 96.7%        | 29,417,191                  | 94.2%          |

<sup>1)</sup> Input, trimmed reads; <sup>2)</sup> mapped, mapped reads to reference genome (Arabidopsis genome sequence TAIR 10); <sup>3)</sup> aligned pairs, aligned pairs of forward and reverse reads



**Table S3.** Expression of the ABA-dependent and -independent genes under osmotic stress conditions in whole seedlings and roots

| Gene               | Locus ID  | NaCl - whole seedling |       | Mannitol - whole seedling |       | NaCl - root |       | Mannitol - root |       | Pathway                                |
|--------------------|-----------|-----------------------|-------|---------------------------|-------|-------------|-------|-----------------|-------|----------------------------------------|
|                    |           | Fold change           | FDR   | Fold change               | FDR   | Fold change | FDR   | Fold change     | FDR   |                                        |
| <i>RAB18</i>       | AT5G66400 | 38.091                | 0.013 | 50.712                    | 0.018 | 117.821     | 0.015 | 216.075         | 0.042 | ABA-dependent pathway                  |
| <i>RD29B</i>       | AT5G52300 | 29.849                | 0.010 | 38.097                    | 0.024 | 28.892      | 0.032 | 64.291          | 0.020 |                                        |
| <i>RD22</i>        | AT5G25610 | 4.727                 | 0.011 | 5.353                     | 0.015 | 7.872       | 0.048 | 9.950           | 0.050 |                                        |
| <i>RD20</i>        | AT2G33380 | 182.569               | 0.014 | 183.186                   | 0.012 | 7.575       | 0.047 | 16.138          | 0.038 |                                        |
| <i>RD26/ANAC72</i> | AT4G27410 | 12.753                | 0.016 | 15.620                    | 0.016 | 5.340       | 0.047 | 6.738           | 0.022 |                                        |
| <i>MYB2</i>        | AT2G47190 | 2.880                 | 0.017 | 3.876                     | 0.031 | 3.813       | 0.019 | 3.118           | 0.047 |                                        |
| <i>ABF3</i>        | AT4G34000 | 5.092                 | 0.011 | 5.562                     | 0.022 | 3.712       | 0.024 | 3.469           | 0.033 |                                        |
| <i>ATAF1/ANAC2</i> | AT1G01720 | 16.016                | 0.009 | 11.089                    | 0.019 | 2.119       | 0.049 | 2.617           | 0.041 |                                        |
| <i>NCED3</i>       | AT3G14440 | 12.105                | 0.004 | 14.173                    | 0.012 | 1.988       | 0.039 | 3.167           | 0.025 |                                        |
| <i>AREB1/ABF2</i>  | AT1G45249 | 2.586                 | 0.018 | 2.804                     | 0.022 | 1.972       | 0.045 | 2.520           | 0.023 |                                        |
| <i>MYC2</i>        | AT1G32640 | 5.997                 | 0.011 | 6.109                     | 0.014 | 1.697       | 0.023 | 1.357           | 0.035 | ABA-independent pathway                |
| <i>ERD10</i>       | AT1G20450 | 17.483                | 0.023 | 19.885                    | 0.014 | 5.089       | 0.011 | 4.745           | 0.024 |                                        |
| <i>DREB2A</i>      | AT5G05410 | 9.149                 | 0.017 | 7.572                     | 0.022 | 1.281       | 0.016 | 1.439           | 0.022 |                                        |
| <i>DREB2B</i>      | AT3G11020 | 2.188                 | 0.042 | 1.601                     | 0.023 | 1.674       | 0.016 | 1.478           | 0.047 | ABA-dependent and -independent pathway |
| <i>COR15A</i>      | AT2G42450 | 250.544               | 0.023 | 283.218                   | 0.016 | 72.846      | 0.011 | 92.981          | 0.037 |                                        |
| <i>RD29A</i>       | AT5G52310 | 83.246                | 0.017 | 81.067                    | 0.014 | 35.333      | 0.021 | 27.753          | 0.027 |                                        |
| <i>KIN1</i>        | AT5G15960 | 255.820               | 0.014 | 216.036                   | 0.038 | 33.538      | 0.032 | 57.192          | 0.023 |                                        |
| <i>COR47/RD17</i>  | AT1G20440 | 9.375                 | 0.019 | 9.817                     | 0.015 | 3.769       | 0.048 | 4.206           | 0.017 |                                        |
| <i>ERD1</i>        | AT5G51070 | 3.304                 | 0.021 | 3.017                     | 0.029 | 1.469       | 0.014 | 1.741           | 0.045 |                                        |

**Table S4.** Expression of transcription factor genes upregulated under osmotic stress conditions in roots

| Locus ID  | Gene Symbol | NaCl - whole seedling |       | Mannitol - whole seedling |       | NaCl - root |       | Mannitol - root |       | TF family         |
|-----------|-------------|-----------------------|-------|---------------------------|-------|-------------|-------|-----------------|-------|-------------------|
|           |             | Fold change           | FDR   | Fold change               | FDR   | Fold change | FDR   | Fold change     | FDR   |                   |
| AT1G62975 | AT1G62975   | 9.439                 | 0.013 | 8.606                     | 0.013 | 18.839      | 0.039 | 14.561          | 0.004 | bHLH              |
| AT3G06490 | MYB108      | 5.270                 | 0.048 | 4.350                     | 0.020 | 7.881       | 0.042 | 6.032           | 0.045 | MYB               |
| AT5G50360 | AITR5       | 3.169                 | 0.019 | 4.653                     | 0.020 | 7.766       | 0.050 | 20.205          | 0.015 | DRG               |
| AT4G23550 | WRKY29      | 1.890                 | 0.049 | 2.100                     | 0.032 | 5.399       | 0.050 | 2.790           | 0.045 | WRKY              |
| AT2G47460 | MYB12       | 2.573                 | 0.034 | 2.515                     | 0.038 | 4.801       | 0.035 | 4.635           | 0.033 | MYB               |
| AT5G59570 | BOA         | 1.837                 | 0.027 | 1.941                     | 0.050 | 3.713       | 0.047 | 3.464           | 0.041 | GARP              |
| AT3G24310 | MYB71       | 2.162                 | 0.018 | 1.729                     | 0.034 | 3.512       | 0.015 | 3.001           | 0.046 | MYB               |
| AT2G47260 | WRKY23      | 2.588                 | 0.018 | 1.983                     | 0.022 | 3.344       | 0.021 | 3.282           | 0.027 | WRKY              |
| AT1G22640 | MYB3        | 1.219                 | 0.046 | 1.314                     | 0.030 | 2.655       | 0.028 | 3.643           | 0.036 | MYB               |
| AT1G25560 | TEM1        | 1.203                 | 0.010 | 1.337                     | 0.045 | 2.642       | 0.017 | 2.092           | 0.014 | AP2/ERF           |
| AT1G51950 | IAA18       | 1.850                 | 0.013 | 1.894                     | 0.013 | 2.497       | 0.018 | 2.555           | 0.025 | IAA               |
| AT2G45050 | GATA2       | 1.483                 | 0.043 | 1.572                     | 0.024 | 2.484       | 0.020 | 3.391           | 0.039 | GATA              |
| AT3G07650 | COL9        | 1.453                 | 0.043 | 1.240                     | 0.037 | 2.451       | 0.019 | 3.012           | 0.034 | B-box zinc finger |
| AT3G46640 | PCL1        | 1.212                 | 0.031 | 1.076                     | 0.027 | 2.358       | 0.029 | 2.342           | 0.039 | MYB               |
| AT5G06980 | LNK4        | 1.926                 | 0.037 | 1.904                     | 0.050 | 2.341       | 0.014 | 3.344           | 0.047 | B-box zinc finger |
| AT3G23030 | IAA2        | 0.978                 | 0.015 | 1.446                     | 0.016 | 2.180       | 0.025 | 2.313           | 0.028 | IAA               |
| AT1G19850 | MP          | 1.180                 | 0.016 | 1.365                     | 0.050 | 1.985       | 0.019 | 2.208           | 0.042 | IAA               |
| AT5G57660 | COL5        | 1.618                 | 0.028 | 1.684                     | 0.022 | 1.886       | 0.026 | 2.373           | 0.027 | B-box zinc finger |
| AT4G38620 | MYB4        | 1.163                 | 0.019 | 1.110                     | 0.039 | 1.701       | 0.016 | 2.051           | 0.045 | MYB               |
| AT2G33310 | IAA13       | 1.027                 | 0.048 | 0.806                     | 0.028 | 1.613       | 0.039 | 2.024           | 0.042 | IAA               |
| AT5G24800 | bZIP9       | 1.790                 | 0.034 | 1.430                     | 0.011 | 1.399       | 0.021 | 2.366           | 0.037 | bZIP              |
| AT4G15090 | FAR1        | 1.138                 | 0.028 | 1.744                     | 0.035 | 1.383       | 0.049 | 2.185           | 0.011 | FRS               |
| AT5G25830 | GATA12      | 1.448                 | 0.016 | 1.372                     | 0.049 | 1.372       | 0.037 | 2.116           | 0.046 | GATA              |

**Table S5.** Expression level of alternative splice variants upregulated under osmotic stress conditions in roots

| Gene       | Locus ID  | Description                                                                          | Splice variant | NaCl        |       | Mannitol    |       |
|------------|-----------|--------------------------------------------------------------------------------------|----------------|-------------|-------|-------------|-------|
|            |           |                                                                                      |                | Fold change | FDR   | Fold change | FDR   |
| ZIFL1      | AT5G13750 | zinc induced facilitator-like 1                                                      | AT5G13750.1*   | 1.353       | 0.049 | 2.922       | 0.044 |
|            |           |                                                                                      | AT5G13750.2    | 5.012       | 0.018 | 5.110       | 0.047 |
|            |           |                                                                                      | AT5G13750.3    | 2.252       | 0.032 | 2.301       | 0.035 |
|            |           |                                                                                      | AT5G13750.4    | 3.889       | 0.039 | 4.337       | 0.044 |
| HSFA2      | AT2G26150 | member of Heat Stress Transcription Factor family                                    | AT2G26150.1*   | 0.467       | 0.046 | 1.713       | 0.038 |
|            |           |                                                                                      | AT2G26150.2    | 0.943       | 0.050 | 1.245       | 0.050 |
|            |           |                                                                                      | AT2G26150.3    | 0.847       | 0.050 | 1.400       | 0.039 |
|            |           |                                                                                      | AT2G26150.4    | 0.446       | 0.037 | 2.474       | 0.024 |
| UNE6/LUC7A | AT3G03340 | LUC7 related protein                                                                 | AT3G03340.1    | 1.277       | 0.049 | 1.219       | 0.043 |
|            |           |                                                                                      | AT3G03340.2*   | 1.324       | 0.043 | 2.222       | 0.039 |
|            |           |                                                                                      | AT3G03340.3    | 1.182       | 0.043 | 0.881       | 0.039 |
| RS41       | AT5G52040 | Encodes an arginine/serine-rich splicing factor                                      | AT5G52040.1    | 0.925       | 0.043 | 0.874       | 0.37  |
|            |           |                                                                                      | AT5G52040.2*   | 0.806       | 0.017 | 0.829       | 0.049 |
|            |           |                                                                                      | AT5G52040.5    | 1.032       | 0.050 | 0.912       | 0.050 |
|            |           |                                                                                      | AT5G52040.3    | 1.417       | 0.043 | 1.000       | 0.050 |
|            |           |                                                                                      | AT5G52040.4    | 1.723       | 0.043 | 2.007       | 0.046 |
|            |           |                                                                                      | AT5G52040.6    | 0.741       | 0.049 | 1.463       | 0.050 |
|            |           |                                                                                      | AT5G52040.7    | 0.741       | 0.049 | 0.940       | 0.050 |
| SKIP       | AT1G77180 | Encodes a putative transcriptional factor                                            | AT1G77180.1*   | 1.273       | 0.029 | 1.487       | 0.048 |
|            |           |                                                                                      | AT1G77180.2    | 2.011       | 0.014 | 1.890       | 0.037 |
|            |           |                                                                                      | AT1G77180.3    | 0.832       | 0.047 | 0.926       | 0.050 |
| AtBBD2     | AT1G19660 | Encodes a bifunctional nuclease with non-substrate-specific DNase and RNase activity | AT1G19660.1*   | 0.584       | 0.046 | 1.235       | 0.029 |
|            |           |                                                                                      | AT1G19660.2    | 2.003       | 0.031 | 3.145       | 0.018 |
|            |           |                                                                                      | AT1G19660.3    | 0.861       | 0.043 | 1.232       | 0.045 |
| MYB3       | AT1G22640 | MYB-type transcription factor                                                        | AT1G22640.1*   | 2.205       | 0.028 | 3.581       | 0.043 |
|            |           |                                                                                      | AT1G22640.2    | 2.383       | 0.043 | 1.505       | 0.041 |
|            |           |                                                                                      | AT1G22640.3    | 2.723       | 0.045 | 2.666       | 0.049 |
| Cor413im2  | AT1G29390 | Integral membrane protein in the inner envelope of chloroplasts                      | AT1G29390.1*   | 2.956       | 0.029 | 2.644       | 0.029 |
|            |           |                                                                                      | AT1G29390.2    | 1.009       | 0.050 | 1.739       | 0.028 |

(Continued)

**Table S5. Continued**

| Gene      | Locus ID  | Description                                                          | Splice variant | NaCl        |       | Mannitol    |       |
|-----------|-----------|----------------------------------------------------------------------|----------------|-------------|-------|-------------|-------|
|           |           |                                                                      |                | Fold change | FDR   | Fold change | FDR   |
| 4CL1      | AT1G51680 | encodes an isoform of 4-coumarate:CoA ligase                         | AT1G51680.1*   | 2.953       | 0.015 | 2.791       | 0.049 |
|           |           |                                                                      | AT1G51680.2    | 1.013       | 0.050 | 1.281       | 0.047 |
|           |           |                                                                      | AT1G51680.3    | 1.349       | 0.046 | 0.697       | 0.050 |
| EXPA1     | AT1G69530 | Member of Alpha-Expansin Gene Family                                 | AT1G69530.1    | 0.836       | 0.038 | 0.819       | 0.047 |
|           |           |                                                                      | AT1G69530.2    | 2.416       | 0.027 | 2.917       | 0.038 |
|           |           |                                                                      | AT1G69530.3*   | 1.239       | 0.050 | 1.507       | 0.037 |
|           |           |                                                                      | AT1G69530.4    | 1.739       | 0.031 | 2.734       | 0.037 |
|           |           |                                                                      | AT1G69530.5    | 1.295       | 0.043 | 1.084       | 0.047 |
| AT1G71000 | AT1G71000 | Chaperone DnaJ-domain superfamily protein                            | AT1G71000.1*   | 5.257       | 0.049 | 9.776       | 0.048 |
|           |           |                                                                      | AT1G71000.2    | 1.582       | 0.038 | 2.538       | 0.044 |
| GRP-3     | AT2G05520 | Encodes a glycine-rich protein                                       | AT2G05520.1*   | 4.879       | 0.039 | 7.460       | 0.032 |
|           |           |                                                                      | AT2G05520.2    | 4.165       | 0.019 | 7.855       | 0.035 |
|           |           |                                                                      | AT2G05520.3    | 2.780       | 0.016 | 6.591       | 0.027 |
|           |           |                                                                      | AT2G05520.4    | 3.812       | 0.043 | 11.621      | 0.022 |
|           |           |                                                                      | AT2G05520.5    | 49.042      | 0.043 | 13.809      | 0.033 |
|           |           |                                                                      | AT2G05520.6    | 4.005       | 0.049 | 7.282       | 0.042 |
| ADF5      | AT2G16700 | Encodes actin depolymerizing factor 5                                | AT2G16700.1*   | 1.729       | 0.046 | 1.882       | 0.049 |
|           |           |                                                                      | AT2G16700.2    | 3.763       | 0.034 | 2.935       | 0.044 |
|           |           |                                                                      | AT2G16700.3    | 1.021       | 0.050 | 1.550       | 0.048 |
|           |           |                                                                      | AT2G16700.4    | 0.992       | 0.050 | 1.346       | 0.026 |
| AT2G23910 | AT2G23910 | NAD(P)-binding Rossmann-fold superfamily protein                     | AT2G23910.1*   | 5.162       | 0.025 | 3.255       | 0.038 |
|           |           |                                                                      | AT2G23910.2    | 2.590       | 0.048 | 1.628       | 0.014 |
|           |           |                                                                      | AT2G23910.3    | 1.926       | 0.014 | 1.855       | 0.046 |
|           |           |                                                                      | AT2G23910.4    | 0.943       | 0.046 | 1.062       | 0.050 |
| ANNAT4    | AT2G38750 | Annexins are a family of calcium dependent membrane binding proteins | AT2G38750.1*   | 12.033      | 0.032 | 7.146       | 0.043 |
|           |           |                                                                      | AT2G38750.2    | 1.061       | 0.028 | 1.030       | 0.050 |
| MAGL6     | AT2G39400 | alpha/beta-Hydrolases superfamily protein                            | AT2G39400.1*   | 2.925       | 0.014 | 3.660       | 0.050 |
|           |           |                                                                      | AT2G39400.2    | 1.289       | 0.016 | 1.363       | 0.047 |
| IAA2      | AT3G23030 | auxin inducible gene expressed in the nucleus                        | AT3G23030.1    | 2.171       | 0.019 | 2.296       | 0.043 |
|           |           |                                                                      | AT3G23030.2*   | 0.869       | 0.024 | 1.078       | 0.037 |

(Continued)

**Table S5. Continued**

| Gene      | Locus ID  | Description                                             | Splicing variant | NaCl        |       | Mannitol    |       |
|-----------|-----------|---------------------------------------------------------|------------------|-------------|-------|-------------|-------|
|           |           |                                                         |                  | Fold change | FDR   | Fold change | FDR   |
| ICE1      | AT3G26744 | Encodes a MYC-like bHLH transcriptional activator       | AT3G26744.1*     | 1.377       | 0.028 | 2.370       | 0.041 |
|           |           |                                                         | AT3G26744.2      | 2.830       | 0.029 | 3.224       | 0.043 |
|           |           |                                                         | AT3G26744.4      | 1.001       | 0.043 | 1.000       | 0.050 |
|           |           |                                                         | AT3G26744.5      | 1.603       | 0.045 | 1.941       | 0.027 |
|           |           |                                                         | AT3G26744.6      | 1.791       | 0.036 | 1.886       | 0.047 |
| PME34     | AT3G49220 | Pectin methylesterase                                   | AT3G49220.1      | 3.181       | 0.029 | 3.564       | 0.036 |
|           |           |                                                         | AT3G49220.2      | 1.072       | 0.050 | 1.925       | 0.042 |
|           |           |                                                         | AT3G49220.3*     | 1.000       | 0.047 | 1.000       | 0.047 |
| TRM19     | AT3G53540 | afadin                                                  | AT3G53540.1*     | 3.785       | 0.013 | 6.765       | 0.018 |
|           |           |                                                         | AT3G53540.2      | 1.181       | 0.046 | 1.327       | 0.016 |
| AT4G21910 | AT4G21910 | MATE efflux family protein                              | AT4G21910.1      | 4.064       | 0.037 | 2.487       | 0.036 |
|           |           |                                                         | AT4G21910.2*     | 1.491       | 0.036 | 1.268       | 0.017 |
|           |           |                                                         | AT4G21910.3      | 1.149       | 0.045 | 1.128       | 0.029 |
|           |           |                                                         | AT4G21910.4      | 1.153       | 0.011 | 1.336       | 0.37  |
| BCH1/CHY1 | AT4G25700 | Converts beta-carotene to zeaxanthin via cryptoxanthin. | AT4G25700.1*     | 2.371       | 0.026 | 4.535       | 0.036 |
|           |           |                                                         | AT4G25700.2      | 1.218       | 0.021 | 1.477       | 0.036 |
|           |           |                                                         | AT4G25700.3      | 0.796       | 0.040 | 1.379       | 0.046 |
| COR28     | AT4G33980 | Acts as a key regulator in the COP1-HY5 regulatory hub  | AT4G33980.1      | 2.151       | 0.024 | 2.140       | 0.032 |
|           |           |                                                         | AT4G33980.2*     | 1.000       | 0.043 | 1.172       | 0.022 |
| CAD9      | AT4G39330 | Member of a family of cinnamyl alcohol dehydrogenases   | AT4G39330.1*     | 4.408       | 0.023 | 3.501       | 0.039 |
|           |           |                                                         | AT4G39330.2      | 2.150       | 0.043 | 1.074       | 0.047 |
| GORK      | AT5G37500 | Encodes a guard cell outward potassium channel          | AT5G37500.1      | 2.387       | 0.015 | 2.917       | 0.032 |
|           |           |                                                         | AT5G37500.2*     | 1.062       | 0.050 | 0.872       | 0.047 |
|           |           |                                                         | AT5G37500.3      | 1.384       | 0.043 | 1.644       | 0.039 |
|           |           |                                                         | AT5G37500.4      | 0.927       | 0.050 | 1.365       | 0.036 |
| NUDT2     | AT5G47650 | Encodes an ADP-ribose pyrophosphatase                   | AT5G47650.1      | 2.155       | 0.020 | 3.164       | 0.029 |
|           |           |                                                         | AT5G47650.2*     | 2.177       | 0.029 | 2.177       | 0.039 |
|           |           |                                                         | AT5G47650.3      | 1.091       | 0.050 | 0.818       | 0.046 |
|           |           |                                                         | AT5G47650.4      | 1.350       | 0.038 | 1.230       | 0.039 |
|           |           |                                                         | AT5G47650.5      | 1.006       | 0.043 | 1.000       | 0.050 |

\* indicates representative isoform in TAIR

**Table S6.** List of primers for RT-PCR

| Gene             | Forward                        | Reverse                      |
|------------------|--------------------------------|------------------------------|
| <i>GAPc</i>      | 5'-GTGTCCCAACCGTTGATGTC-3'     | 5'-TCCCTTGAGTTTGCCTTCGG-3'   |
| <i>RAB18</i>     | 5'-TACCAGAACCGTCCAGGAGG-3'     | 5'-CGTACTCGTCATACTGCTGC-3'   |
| <i>AT1G62975</i> | 5'-AGGCAAAGAAGACAAGAAGTTTCA-3' | 5'-GTAGTTCACTGCCTGCACGA-3'   |
| <i>AITR5</i>     | 5'-GAGGGAGAGTATGAGTTAGG-3'     | 5'-GTTTCGTCCAAATGACTCTCC-3'  |
| <i>WRKY29</i>    | 5'-ATCTGTTGTCTGGACGCATGG-3'    | 5'-TTGCCAAACACCCTTTTGAGC-3'  |
| <i>BOA</i>       | 5'-TTGGTGGTGGTGACGTGAATG-3'    | 5'-CAACAACCTCATGAAGTGGGAA-3' |
| <i>MYB3</i>      | 5'-AAGCTCCATAGCTTGCTGG-3'      | 5'-GGCTGAGAAGCTTCCTCTTGA-3'  |
| <i>ANNAT4.1</i>  | 5'-TCTCAGCTGGGATGGGAATG-3'     | 5'-GAAACTTTTGCTTGCTTTCC-3'   |
| <i>ANNAT4.2</i>  | 5'-TTTGTGTTTATAGGGATGG-3'      | 5'-GAAACTTTTGCTTGCTTTCC-3'   |
| <i>MAGL6.1</i>   | 5'-GAAATCAGGTGAGGGAGAAC-3'     | 5'-GGAATTGATACCTGGTGAAG-3'   |
| <i>MAGL6.2</i>   | 5'-GAAATCAGGTGAGGGAGAAC-3'     | 5'-AAAATTAGAACCTGGTGAAG-3'   |
| <i>TRM19.1</i>   | 5'-CTCACCAAGGAAAGAAACAG-3'     | 5'-GGAAAATCTTGCTTGTTTTTC-3'  |
| <i>TRM19.2</i>   | 5'-AAGTCATTCATTTTTTCGG-3'      | 5'-GGAAAATCTTGCTTGTTTTTC-3'  |
| <i>CAD9.1</i>    | 5'-GGAAAGCTCATTGCTTTAGG-3'     | 5'-CCACGTCACCTCCTCCAACC-3'   |
| <i>CAD9.2</i>    | 5'- GGAAAGCTCATTGCTTTAGG -3'   | 5'- TTAGCAAGCTTCCTCCAACC-3'  |
