# Supplementary material for: Genome-Wide Analysis of Stress-Responsive Genes and Alternative Splice Variants in Arabidopsis Roots under Osmotic Stresses
Source: Int J Mol Sci. 2023 Sep 26;24(19):14580. doi: 10.3390/ijms241914580 (PMC10573044; doi:10.3390/ijms241914580)
Supplement: Supplementary file 1 [file ijms-24-14580-s001.zip › Table S2-2023-08-24.xlsx]

## Sheet: Table S1
Table S2. Expression of genes under NaCl and mannitol treatment in whole seedlings and roots using mRNA-Seq
Locus tag	Gene Symbol	Fold change				FDR				Annotation
		NaCl - whole seedling	mannitol - Whole seedling	NaCl - root	Mannitol - root	NaCl - whole seedling	mannitol - Whole seedling	NaCl - root	Mannitol - root	Entrez ID	Gene ID	Seqnames	Start	End	Width	Strand	Gene biotype	Gene	Description
AT3G02435	AT3G02435	898.545	0.992459	1.00572	1.00156	0.658936	0.454435	0.734616	0.686581	28718571	gene17344	NC_003074.8	3628023	3628099	77	-	snoRNA	.	snoR131
AT4G02940	T4I9.18	2.91131	2.33345	3.50398	3.04145	0.0150623	0.0372473	0.0197336	0.0174508	828132	gene24076	NC_003075.7	1306313	1311038	4726	+	protein_coding	T4I9.18	.
AT1G04527	AT1G04527	582.847	0.992558	1.00564	1.00154	0.658936	0.454435	0.734616	0.686581	28716138	gene782	NC_003070.9	2111064	2111147	84	-	snoRNA	.	AtsnoR43.1
AT3G44860	FAMT	37.3558	60.9345	15.89	3.04862	0.0141469	0.0158081	0.0312001	0.051504	823620	gene21163	NC_003074.8	16379571	16381434	1864	+	protein_coding	FAMT	Encodes a farnesoic acid carboxyl-O-methyltransferase.
AT2G29440	GSTU6	11.6137	13.1292	17.7774	12.6375	0.0122013	0.0216611	0.0427208	0.0261739	817493	gene13533	NC_003071.7	12619630	12621231	1602	-	protein_coding	GSTU6	Encodes glutathione transferase belonging to the tau class of GSTs. Naming convention according to Wagner et al. (2002).
AT5G66780	MUD21.2	11.2948	9.47672	65.072	107.268	0.0183532	0.0194405	0.0525719	0.0261091	836811	gene37780	NC_003076.8	26663500	26664436	937	+	protein_coding	MUD21.2	.
AT2G22770	NAI1	2.91039	2.6713	3.5435	3.42498	0.0168253	0.0180681	0.0525719	0.0360821	816807	gene12650	NC_003071.7	9684562	9686613	2052	+	protein_coding	NAI1	regulates the development of ER bodies. also involves in response to the endophytic fungus Piriformospora indica.
AT2G33380	RD20	182.569	183.186	7.57497	16.1376	0.014208	0.0124873	0.14707	0.0382867	817901	gene14041	NC_003071.7	14144831	14146555	1725	-	protein_coding	RD20	Encodes a calcium binding protein whose mRNA is induced upon treatment with NaCl, ABA and in response to dessication. mRNA expression under drought conditions is apparent particularly in leaves and flowers. Isoform of caleosin with a role as a peroxygenase involved in oxylipin metabolism during biotic and abiotic stress. Involved in the production of 2-hydroxy-octadecatrienoic acid. The peroxygen…
AT2G38240	F16M14.17	112.813	100.291	81.1727	67.9002	0.00773773	0.0137479	0.0530826	0.0270437	818403	gene14686	NC_003071.7	16012535	16014991	2457	-	protein_coding	F16M14.17	.
AT1G43160	RAP2.6	58.7312	53.5586	24.1698	25.386	0.0142785	0.0168402	0.0530826	0.0186347	840915	gene5070	NC_003070.9	16263805	16264945	1141	+	protein_coding	RAP2.6	encodes a member of the ERF (ethylene response factor) subfamily B-4 of ERF/AP2 transcription factor family (RAP2.6). The protein contains one AP2 domain. There are 7 members in this subfamily.
AT3G48520	CYP94B3	83.2735	87.7147	1.73005	1.93703	0.0114202	0.0230729	0.219059	0.0253669	824011	gene21702	NC_003074.8	17974853	17976774	1922	-	protein_coding	CYP94B3	CYP94B3 is a jasmonoyl-isoleucine-12-hydroxylase that catalyzes the formation of 12-OH-JA-Ile from JA-Ile. By reducing the levels of this the biologically active phytohormone, CYP94B3 attenuates the jasmonic acid signaling cascade. CYP94B3 transcript levels rise in response to wounding.
AT5G59220	HAI1	40.006	44.4591	5.51228	11.6915	0.0159209	0.0302394	0.0530826	0.0811907	836040	gene36814	NC_003076.8	23894404	23896939	2536	-	protein_coding	HAI1	Encodes a member of the PP2C family (Clade A protein phosphatases type 2C). Functions as a negative regulator of osmotic stress and ABA signaling.
ArthCp050	psbT	81.7217	43.7425	1.00495	1.00135	0.658936	0.67153	0.734616	0.686581	.	gene38251	NC_000932.1	74082	74183	102	+	protein_coding	psbT	.
AT1G69260	AFP1	23.8535	23.1129	5.69202	6.71059	0.0146622	0.0137479	0.0530826	0.039584	843257	gene8201	NC_003070.9	26038905	26040720	1816	+	protein_coding	AFP1	.
AT4G37990	ELI3-2	77.6135	40.5397	5.28642	6.63088	0.00999249	0.0228435	0.0685991	0.0462526	829955	gene29201	NC_003075.7	17855637	17857878	2242	+	protein_coding	ELI3-2	Encodes an aromatic alcohol:NADP+ oxidoreductase whose mRNA levels are increased in response to treatment with a variety of phytopathogenic bacteria. Though similar to mannitol dehydrogenases, this enzyme does not have mannitol dehydrogenase activity.
AT1G17420	LOX3	11.8523	22.1624	3.43262	1.61864	0.0127888	0.02009	0.0530826	0.117942	838314	gene2165	NC_003070.9	5977323	5981521	4199	+	protein_coding	LOX3	LOX3 encode a Lipoxygenase. Lipoxygenases (LOXs) catalyze the oxygenation of fatty acids (FAs).
AT1G15010	T15D22.5	75.8416	54.1742	1.34819	1.16425	0.0332898	0.0198275	0.716371	0.136658	838066	gene1858	NC_003070.9	5171181	5171956	776	+	protein_coding	T15D22.5	.
AT5G65280	GCL1	11.2203	9.98045	8.85208	9.11008	0.0139705	0.02509	0.0530826	0.0418003	836653	gene37564	NC_003076.8	26085593	26088277	2685	-	protein_coding	GCL1	Encodes a protein with reported similarity to GCR2 a putative G protein coupled receptor thought to be an ABA receptor. Loss of function mutations in GCL1 show no ABA response defects based on assays of seed germination and seedling development.GCL1 also has similarity to LANCL1 and LANCL2, human homologs of bacterial lanthionine synthetase.
AT1G47130	AT1G47130	10.5573	8.87083	3.72468	3.05348	0.211314	0.113787	0.0530826	0.21615	28717332	gene5342	NC_003070.9	17291755	17292755	1001	+	protein_coding	.	.
AT4G08985	AT4G08985	54.8786	26.6972	1.81647	0.840488	0.0168638	0.0250523	0.393516	0.102645	28720030	gene28744	NC_003075.7	16452065	16452725	661	-	lncRNA	.	Natural antisense transcript overlaps with AT4G34410
AT3G46660	UGT76E12	54.2985	31.6943	5.2277	6.22379	0.0111769	0.013153	0.155067	0.0707545	823819	gene21435	NC_003074.8	17189264	17191167	1904	-	protein_coding	UGT76E12	.
AT5G54300	MDK4.12	10.3194	10.3463	8.46544	8.94799	0.0146358	0.0231116	0.0530826	0.0703712	835518	gene36192	NC_003076.8	22053969	22055443	1475	-	protein_coding	MDK4.12	.
AT4G04615	U6.4	49.2705	0.994734	1.00398	1.00109	0.658936	0.454386	0.734616	0.686581	28719576	gene24154	NC_003075.7	1483021	1483121	101	-	snRNA	U6.4	.
AT1G21790	F8K7.23	9.88622	7.58176	10.2468	10.6233	0.017548	0.013153	0.0530826	0.0233633	838783	gene2739	NC_003070.9	7654088	7655981	1894	+	protein_coding	F8K7.23	.
AT3G56275	AT3G56275	9.57927	9.28105	5.23832	11.1696	0.0101368	0.0950173	0.0530826	0.0174508	3769724	gene22694	NC_003074.8	20872790	20873571	782	+	transcribed_pseudogene	.	pseudogene of unknown protein
AT2G36780	F13K3.18	47.1149	7.71133	2.19864	4.09187	0.0161013	0.0137479	0.173477	0.0268778	818250	gene14502	NC_003071.7	15417364	15419391	2028	-	protein_coding	F13K3.18	.
AT4G21830	MSRB7	8.366	5.57643	3.62157	1.72598	0.0123761	0.140479	0.0530826	0.0473231	828271	gene27080	NC_003075.7	11584346	11585542	1197	-	protein_coding	MSRB7	.
AT1G09350	GolS3	7.77558	6.06391	9.31267	4.6653	0.00890468	0.013153	0.0530826	0.0186347	837457	gene1099	NC_003070.9	3019639	3021443	1805	+	protein_coding	GolS3	Predicted to encode a galactinol synthase
AT4G08555	AT4G08555	38.3742	7.72578	1.15364	0.51885	0.0313054	0.0883573	0.770245	0.191925	826416	gene25136	NC_003075.7	5448049	5448638	590	+	protein_coding	.	.
AT1G29690	CAD1	7.10243	4.72239	2.94235	3.36151	0.0123774	0.0329153	0.0530826	0.0428261	839846	gene8634	NC_003070.9	10379020	10382153	3134	-	protein_coding	CAD1	Encodes a protein containing a domain with significant homology to the MACPF (membrane attack complex and perforin) domain of complements and perforin proteins that are involved in innate immunity in animals. Transgenic <i>cad1-1</i> mutant plants show lesions seen in the hypersensitive response, as well as a spontaneous activation of expression of pathogenesis-related genes and leading to a 32-f…
AT5G09980	PROPEP4	6.79878	3.94119	2.99626	1.81415	0.0514012	0.0235608	0.0530826	0.064362	830859	gene30577	NC_003076.8	3122731	3124003	1273	+	protein_coding	PROPEP4	.
AT4G24340	T22A6.170	6.64023	6.41363	2.9778	2.62698	0.0186906	0.0182773	0.0530826	0.0339172	828537	gene27434	NC_003075.7	12607371	12609252	1882	+	protein_coding	T22A6.170	.
AT5G11110	SPS2F	6.34658	6.8712	8.12505	8.65373	0.0112467	0.0200638	0.0530826	0.0137723	830979	gene30726	NC_003076.8	3536189	3541149	4961	+	protein_coding	SPS2F	Encodes a protein with putative sucrose-phosphate synthase activity.Involved in pollen exine formation.
AT4G01630	EXPA17	6.01094	4.86928	2.95694	3.49585	0.0195721	0.0147199	0.0530826	0.0355793	827983	gene23883	NC_003075.7	700566	701769	1204	+	protein_coding	EXPA17	member of Alpha-Expansin Gene Family. Naming convention from the Expansin Working Group (Kende et al, 2004. Plant Mol Bio)
AT5G35940	MEE13.1	5.83613	3.6464	3.40424	2.91317	0.0233162	0.0417216	0.0530826	0.0436655	833584	gene33698	NC_003076.8	14090574	14093007	2434	+	protein_coding	MEE13.1	.
AT5G48180	NSP5	5.53877	3.05161	4.23909	5.36553	0.0139705	0.0335538	0.0530826	0.102823	834871	gene35374	NC_003076.8	19540937	19542760	1824	-	protein_coding	NSP5	Encodes a nitrile-specifier protein NSP5. NSP5 is one out of five (At3g16400/NSP1, At2g33070/NSP2, At3g16390/NSP3, At3g16410/NSP4 and At5g48180/NSP5) A. thaliana epithiospecifier protein (ESP) homologues that promote simple nitrile, but not epithionitrile or thiocyanate formation.
ArthCt109	rrn4.5S	31.0353	34.2214	1.00431	1.00118	0.658936	0.67153	0.734616	0.686581	.	gene38278	NC_000932.1	107599	107701	103	+	rRNA	rrn4.5S	.
AT5G53120	SPDS3	5.41416	4.69327	2.52397	2.96716	0.00996556	0.0168402	0.0530826	0.036255	835392	gene36032	NC_003076.8	21534473	21537816	3344	+	protein_coding	SPDS3	encodes a novel spermine synthase and is a paralog of previously characterized spermidine synthases, SPDS1 and SPDS2. SPDS3 forms heterodimers with SDPS2, which in turn forms heterodimers with SDPS1 in vivo. The gene does not complement speDelta3 deficiency of spermidine synthase in yeast but DOES complement speDelta4 deficiency.
AT2G18700	TPS11	5.39811	3.68845	4.74404	5.98368	0.00987685	0.0121514	0.0530826	0.0174508	816385	gene12107	NC_003071.7	8108898	8112010	3113	+	protein_coding	TPS11	Encodes an enzyme putatively involved in trehalose biosynthesis. The protein has a trehalose synthase (TPS)-like domain that may or may not be active as well as a trehalose phosphatase (TPP)-like domain.
AT5G63350	K9H21.8	5.31446	8.01556	4.58101	9.6549	0.0327114	0.0145793	0.0530826	0.0647277	836455	gene37326	NC_003076.8	25379931	25381317	1387	-	protein_coding	K9H21.8	.
AT5G02230	T7H20.280	5.22367	4.92262	5.72915	4.70191	0.0123761	0.0140011	0.0530826	0.0318815	831784	gene29643	NC_003076.8	448092	450737	2646	+	protein_coding	T7H20.280	.
AT3G01055	AT3G01055	29.7406	34.3111	1.26768	0.855028	0.04124	0.0994205	1	0.815735	28718455	gene16132	NC_003074.8	296024	296228	205	-	lncRNA	.	Natural antisense transcript overlaps with AT3G01830
AT1G60470	GolS4	5.20496	4.59725	10.0197	16.0012	0.0182737	0.041415	0.0530826	0.0189443	842342	gene7005	NC_003070.9	22278975	22280593	1619	-	protein_coding	GolS4	Predicted to encode a galactinol synthase.
AT5G55180	MCO15.13	4.64432	5.92372	6.14393	4.86417	0.0134947	0.0203663	0.0530826	0.0174508	835611	gene36301	NC_003076.8	22388521	22390763	2243	+	protein_coding	MCO15.13	.
AT4G34131	UGT73B3	4.56762	2.9884	2.95864	1.78075	0.0211134	0.0282479	0.0530826	0.0233633	829559	gene28703	NC_003075.7	16343057	16344818	1762	-	protein_coding	UGT73B3	.
AT4G01026	PYL7	4.55785	4.72461	5.18263	7.90368	0.0219435	0.0224776	0.0530826	0.0233633	827923	gene23798	NC_003075.7	446978	448511	1534	+	protein_coding	PYL7	Encodes a member of the PYR (pyrabactin resistance)/PYL(PYR1-like)/RCAR (regulatory components of ABA receptor) family proteins with 14 members. PYR/PYL/RCAR family proteins function as abscisic acid sensors. Mediate ABA-dependent regulation of protein phosphatase 2Cs ABI1 and ABI2. PYL/RCAR family proteins function as abscisic acid sensors. Mediate ABA-dependent regulation of ABI1 and ABI2.
AT3G01420	DOX1	4.3885	3.75806	2.52807	2.48529	0.01327	0.0137479	0.0530826	0.0304541	821135	gene16082	NC_003074.8	159450	162905	3456	-	protein_coding	DOX1	Encodes an alpha-dioxygenase involved in protection against oxidative stress and cell death. Induced in response to Salicylic acid and oxidative stress. Independent of NPR1 in induction by salicylic acid.
AT2G36750	UGT73C1	27.3693	10.2586	1.00433	1.00118	0.00937107	0.0137479	0.734616	0.686581	818247	gene14499	NC_003071.7	15410376	15412064	1689	-	protein_coding	UGT73C1	.
AT1G23800	ALDH2B7	4.19043	4.45782	9.39312	9.60785	0.0159163	0.0194234	0.0530826	0.039584	838991	gene2985	NC_003070.9	8412051	8414886	2836	-	protein_coding	ALDH2B7	Encodes a mitochondrial aldehyde dehydrogenase; nuclear gene for mitochondrial product.
AT3G14690	CYP72A15	4.14278	3.61903	4.39013	4.29028	0.0250765	0.0202948	0.0530826	0.0259183	820697	gene17795	NC_003074.8	4937172	4939871	2700	+	protein_coding	CYP72A15	putative cytochrome P450
AT1G48100	F21D18.18	25.5621	18.5383	2.46237	5.22827	0.00611653	0.0231701	0.109821	0.0342996	841228	gene5496	NC_003070.9	17766738	17769951	3214	+	protein_coding	F21D18.18	.
AT1G07400	F22G5.25	25.2894	4.19826	0.610226	4.43437	0.0150602	0.0364142	0.12881	0.057238	837252	gene850	NC_003070.9	2274926	2275783	858	+	protein_coding	F22G5.25	.
AT3G24420	AT3G24420	25.2148	17.2868	3.03402	3.47582	0.0116702	0.0137479	0.220728	0.0396554	822032	gene19135	NC_003074.8	8862813	8865239	2427	-	protein_coding	.	.
AT3G15990	SULTR3%3B4	3.95362	3.35319	5.27956	4.40364	0.0114682	0.0324356	0.0530826	0.0476375	820844	gene17973	NC_003074.8	5426987	5430897	3911	+	protein_coding	SULTR3;4	Encodes sulfate transporter Sultr3;4.
AT1G69140	F4N2.10	24.6582	20.4406	1.93696	2.76193	0.0216406	0.0196972	0.124416	0.129357	3767675	gene8186	NC_003070.9	25991371	25992018	648	-	transcribed_pseudogene	F4N2.10	.
AT2G26380	T9J22.5	3.94783	2.54571	13.5606	5.25846	0.0199151	0.0332207	0.0530826	0.0298352	817178	gene13148	NC_003071.7	11226488	11228123	1636	-	protein_coding	T9J22.5	.
AT2G22880	T20K9.9	23.9426	30.4079	1.78933	1.40256	0.0489169	0.0137479	0.301428	0.351262	816819	gene12667	NC_003071.7	9741119	9741463	345	-	protein_coding	T20K9.9	.
AT1G77120	ADH1	3.53091	2.70572	9.11681	8.41232	0.0101368	0.0186312	0.0530826	0.0226321	844047	gene9206	NC_003070.9	28975255	28977417	2163	+	protein_coding	ADH1	Catalyzes the reduction of acetaldehyde using NADH as reductant. Requires zinc for activity. Dimer. Anaerobic response polypeptide (ANP). Fermentation. The protein undergoes thiolation following treatment with the oxidant tert-butylhydroperoxide.
AT4G11350	F8L21.140	3.38499	3.13292	2.88118	2.65157	0.0430529	0.0355796	0.0530826	0.0398613	826737	gene25551	NC_003075.7	6901456	6904426	2971	+	protein_coding	F8L21.140	.
AT3G47960	GTR1	3.37534	3.68306	2.33482	1.31863	0.0184107	0.013153	0.0530826	0.0691497	823951	gene21610	NC_003074.8	17697942	17700923	2982	-	protein_coding	GTR1	Encodes a high-affinity, proton-dependent glucosinolate-specific transporter that is crucial for the transport of both methionine- and tryptophan-derived glucosinolates to seeds.
AT1G08920	ESL1	3.35948	3.13087	2.85963	2.30919	0.0384484	0.0250573	0.0530826	0.0233633	837413	gene1049	NC_003070.9	2867203	2870745	3543	+	protein_coding	ESL1	Encodes ESL1, a transporter for monosaccharides.
AT1G07477	AT1G07477	22.6256	14.8455	4.20268	5.98246	0.0130501	0.0151842	0.312341	0.0290377	28716660	gene5497	NC_003070.9	17769036	17769837	802	-	lncRNA	.	Natural antisense transcript overlaps with AT1G48100
AT5G63160	BT1	3.32636	2.45834	8.88381	6.46151	0.0134947	0.0198275	0.0530826	0.0268778	836437	gene37305	NC_003076.8	25333172	25335570	2399	-	protein_coding	BT1	BTB and TAZ domain protein. Short-lived nuclear-cytoplasmic protein targeted for degradation by the 26S proteosome pathway. Acts redundantly with BT2 and BT3 during female gametophyte development.
AT4G24130	T19F6.120	3.06413	2.79832	2.97959	2.71962	0.0302358	0.0246457	0.0530826	0.0642279	828513	gene27406	NC_003075.7	12527675	12528686	1012	+	protein_coding	T19F6.120	.
AT1G76600	F14G6.20	22.4407	9.84232	1.73586	1.03391	0.0083949	0.0217654	0.102483	0.409873	843993	gene9127	NC_003070.9	28746833	28747848	1016	+	protein_coding	F14G6.20	.
AT3G29670	PMAT2	3.06	3.86366	23.0634	17.3951	0.0181704	0.0191581	0.0530826	0.0310399	822645	gene19968	NC_003074.8	11527756	11529420	1665	+	protein_coding	PMAT2	Encodes a malonyltransferase that may play a role in phenolic xenobiotic detoxification.
AT1G69295	PDCB4	2.80885	2.57146	4.11892	4.37575	0.0140449	0.0164085	0.0530826	0.0488747	843261	gene8207	NC_003070.9	26050143	26052721	2579	-	protein_coding	PDCB4	Encodes a member of the X8-GPI family of proteins. It localizes to the plasmodesmata and is predicted to bind callose.
AT3G22620	AT3G22620	2.6386	2.90414	2.78006	2.67277	0.0154646	0.0396759	0.0530826	0.0353513	821833	gene18882	NC_003074.8	8008534	8009590	1057	+	protein_coding	.	.
AT2G37770	ChlAKR	21.134	14.4785	3.91765	5.5305	0.0236607	0.015525	0.202602	0.0365309	818354	gene14624	NC_003071.7	15834766	15837001	2236	+	protein_coding	ChlAKR	Encodes an NADPH-dependent aldo-keto reductase that can act on a wide variety of substrates in vitro including saturated and unsaturated aldehydes, steroids, and sugars. GFP-tagged AKR4C9 localizes to the chloroplast where it may play a role in detoxifying reactive carbonyl compounds that threaten to impair the photosynthetic process. Transcript levels for this gene are up-regulated in response t…
AT1G10585	AT1G10585	20.6157	16.2604	5.18828	8.71588	0.0168638	0.0314127	0.257771	0.0322825	837600	gene1263	NC_003070.9	3493770	3495244	1475	-	protein_coding	.	.
AT2G47460	MYB12	2.57334	2.51452	4.80111	4.63508	0.03356	0.0377138	0.0350826	0.032964	819359	gene15926	NC_003071.7	19476326	19479597	3272	+	protein_coding	MYB12	''MYB12 belongs to subgroup 7 of the R2R3-MYB family. It strongly activates the promoters of chalcone synthase (CHS), flavanone 3-hydroxylase (F3H), flavonol synthase (FLS) and - to a lesser extent - chalcone flavanone isomerase (CHI), but cannot activate the promoters of flavonoid-3'hydroxylase (F3'H) and dihydroflavonol 4-reductase (DF). The activation requires a functional MYB recognition elem…
AT4G23420	F16G20.120	2.54261	2.35504	2.48575	2.23325	0.0368839	0.0534337	0.0530826	0.0338353	828441	gene27299	NC_003075.7	12225515	12228718	3204	+	protein_coding	F16G20.120	.
AT1G03700	CASP-like protein 1C2	2.4644	1.87698	2.02327	1.5903	0.0454792	0.0814031	0.0530826	0.360056	839428	gene354	NC_003070.9	920950	922098	1149	+	protein_coding	CASP-like protein 1C2	.
AT4G34410	RRTF1	19.904	8.75512	1.48681	0.755801	0.0083949	0.0163769	0.332279	0.0360821	829591	gene28743	NC_003075.7	16451876	16453260	1385	+	protein_coding	RRTF1	encodes a member of the ERF (ethylene response factor) subfamily B-3 of ERF/AP2 transcription factor family. The protein contains one AP2 domain. There are 18 members in this subfamily including ATERF-1, ATERF-2, AND ATERF-5.
AT1G80840	WRKY40	19.6695	18.0797	1.88022	1.30691	0.02245	0.0200334	0.108777	0.1495	844423	gene9679	NC_003070.9	30383561	30385499	1939	+	protein_coding	WRKY40	Pathogen-induced transcription factor. Binds W-box sequences in vitro. Forms protein complexes with itself and with WRKY40 and WRKY60. Coexpression with WRKY18 or WRKY60 made plants more susceptible to both P. syringae and B. cinerea. WRKY18, WRKY40, and WRKY60 have partially redundant roles in response to the hemibiotrophic bacterial pathogen Pseudomonas syringae and the necrotrophic fungal path…
AT1G74020	SS2	2.34684	2.66124	2.83675	2.94963	0.0230408	0.0217786	0.0530826	0.0233362	843740	gene8798	NC_003070.9	27835123	27837443	2321	-	protein_coding	SS2	Encodes AtSS-2 strictosidine synthase.
AT5G05730	ASA1	2.3091	3.46597	2.91927	3.37372	0.0204035	0.0284578	0.0530826	0.0255367	830457	gene30084	NC_003076.8	1719533	1722933	3401	-	protein_coding	ASA1	ASA1 encodes the alpha subunit of anthranilate synthase, which catalyzes the rate-limiting step of tryptophan synthesis. ASA1 is induced by ethylene, and forms a link between ethylene signalling and auxin synthesis in roots.
AT5G47330	MQL5.19	19.0025	21.3013	2.3154	1.89192	0.0211429	0.0137674	0.0530826	0.183021	834780	gene35274	NC_003076.8	19206829	19208998	2170	+	protein_coding	MQL5.19	.
AT5G62350	MMI9.21	1.98657	1.99121	3.77438	3.17977	0.0244402	0.0293517	0.0530826	0.024123	836356	gene37198	NC_003076.8	25037191	25038424	1234	+	protein_coding	MMI9.21	.
AT2G42530	COR15B	18.9095	13.8549	2.27064	2.22726	0.0155322	0.0290553	0.074015	0.146336	818853	gene15276	NC_003071.7	17708593	17710433	1841	-	protein_coding	COR15B	Encodes COR15B, a protein that protects chloroplast membranes during freezing.
AT2G25620	DBP1	1.98334	1.79738	2.2829	1.82833	0.0212327	0.0195162	0.0530826	0.0533748	817102	gene13061	NC_003071.7	10902716	10905287	2572	-	protein_coding	DBP1	Encodes DBP1, a member of the DBP factors (DNA-binding protein phosphatases) featuring sequence-specific DNA-binding and protein phosphatase activity. DBP1 is involved in plant-potyvirus interactions. Loss-of-function of DBP1 renders resistance to potyviruses.
AT3G25597	AT3G25597	1.96588	1.46917	3.6258	2.31931	0.147218	0.0494995	0.0530826	0.0318384	3768932	gene19294	NC_003074.8	9305696	9306766	1071	+	protein_coding	.	.
AT2G02010	GAD4	1.89789	2.99227	10.8635	3.58747	0.108646	0.0426049	0.0530826	0.0414341	814732	gene9848	NC_003071.7	474108	476997	2890	-	protein_coding	GAD4	.
AT3G61430	PIP1A	1.44877	2.08924	0.306296	0.533196	0.0417912	0.0425869	0.0530826	0.0186347	825316	gene23365	NC_003074.8	22733243	22735394	2152	+	protein_coding	PIP1A	a member of the plasma membrane intrinsic protein subfamily PIP1. localizes to the plasma membrane and exhibits water transport activity in Xenopus oocyte. expressed ubiquitously and protein level decreases slightly during leaf development.
AT2G41540	GPDHC1	1.39828	1.44106	2.05694	2.32213	0.0429336	0.042238	0.0530826	0.0426611	818752	gene15141	NC_003071.7	17325846	17329235	3390	+	protein_coding	GPDHC1	Encodes a protein with NAD-dependent glycerol-3-phosphate (G3P) dehydrogenase which was shown to complement an Escherichia coli strain: BB20-14, auxotrophic for glycerol/G3P due to a loss-of-function mutation in the gpsA gene.
AT5G04340	ZAT6	17.9691	14.3213	1.89646	1.92167	0.0218582	0.0137479	0.0893093	0.0268778	830313	gene29913	NC_003076.8	1216058	1217362	1305	-	protein_coding	ZAT6	putative c2h2 zinc finger transcription factor mRNA
AT5G17990	TRP1	1.32772	1.71339	2.89282	2.76593	0.0310045	0.0244652	0.0530826	0.0312159	831666	gene31534	NC_003076.8	5957080	5960201	3122	+	protein_coding	TRP1	Encodes the tryptophan biosynthetic enzyme phosphoribosylanthranilate transferase (PAT1, called trpD in bacteria). Converts anthranilate and phosphoribosylpyrophosphate into phosphoribosylanthranilate and inorganic pyrophosphate.
AT3G01290	HIR2	1.16303	1.23667	0.229012	0.194883	0.0327298	0.0746119	0.0530826	0.022353	821309	gene16048	NC_003074.8	87684	89593	1910	-	protein_coding	HIR2	.
AT4G36670	PMT6	1.12156	1.28455	2.03886	1.2881	0.195518	0.151267	0.0530826	0.178271	829820	gene29026	NC_003075.7	17287496	17289728	2233	-	protein_coding	PMT6	.
AT5G59310	LTP4	17.4685	19.6958	3.44603	11.6678	0.0289583	0.0460489	0.0696226	0.0186347	836050	gene36827	NC_003076.8	23924990	23925957	968	-	protein_coding	LTP4	Encodes a member of the lipid transfer protein family. Proteins of this family are generally small (~9 kD), basic, expressed abundantly and contain eight Cys residues. The proteins can bind fatty acids and acylCoA esters and can transfer several different phospholipids. They are localized to the cell wall. The mRNA is present in flowers and siliques, and is strongly up-regulated by abscisic acid.…
AT2G01530	MLP329	1.11135	1.33247	0.448639	0.648944	0.239465	0.0324742	0.0530826	0.0243682	814682	gene9783	NC_003071.7	239669	240687	1019	+	protein_coding	MLP329	.
AT3G11170	FAD7	1.09367	1.27422	2.7462	1.70213	0.0498178	0.0816058	0.0530826	0.0330811	820288	gene17295	NC_003074.8	3499537	3502452	2916	+	protein_coding	FAD7	Chloroplastic enzyme responsible for the synthesis of 16:3 and 18:3 fatty acids from galactolipids, sulpholipids and phosphatidylglycerol. Uses ferredoxin as electron donor. Gene expression is induced by wounding in shoot and root. The wound-response in shoot is independent of jasmonic acid mediated pathway whereas the root response is mediated by jasmonic acid.
AT2G39570	ACR9	0.800351	0.640696	0.407318	0.536403	0.0401079	0.0262342	0.0530826	0.0269023	818542	gene14853	NC_003071.7	16507882	16510264	2383	+	protein_coding	ACR9	Encodes a ACT domain-containing protein. The ACT domain, named after bacterial aspartate kinase, chorismate mutase and TyrA (prephenate dehydrogenase), is a regulatory domain that serves as an amino acid-binding site in feedback-regulated amino acid metabolic enzymes.
AT2G39310	JAL22	0.792338	0.761913	0.359472	0.532901	0.163818	0.132566	0.0530826	0.0487978	818516	gene14816	NC_003071.7	16414034	16416845	2812	-	protein_coding	JAL22	.
AT2G45970	CYP86A8	0.754493	0.77962	2.38074	2.36466	0.0425672	0.0738684	0.0530826	0.0404869	819205	gene15723	NC_003071.7	18912095	18914739	2645	-	protein_coding	CYP86A8	Encodes a member of the CYP86A subfamily of cytochrome p450 genes. Expressed at moderate levels in flowers, leaves, roots and stems.
AT1G05753	AT1G05753	0.642671	0.894823	0.274951	0.367567	0.254884	0.835352	0.0530826	0.04701	28716368	gene2833	NC_003070.9	7949502	7950049	548	-	lncRNA	.	Natural antisense transcript overlaps with AT1G22500
AT1G80160	GLYI7	16.7892	12.4083	3.6331	8.14931	0.0221513	0.0310231	0.175504	0.0506026	844356	gene9598	NC_003070.9	30150897	30152614	1718	+	protein_coding	GLYI7	.
AT1G19180	JAZ1	16.7489	19.5357	1.60023	1.39194	0.00734436	0.0121514	0.22067	0.123455	838501	gene2393	NC_003070.9	6621777	6623668	1892	+	protein_coding	JAZ1	JAZ1 is a nuclear-localized protein involved in jasmonate signaling. JAZ1 transcript levels rise in response to a jasmonate stimulus. JAZ1 can interact with the COI1 F-box subunit of an SCF E3 ubiquitin ligase in a yeast-two-hybrid assay only in the presence of jasmonate-isoleucine (JA-ILE) or coronatine. Application of jasmonate methyl ester to Arabidopsis roots reduces the levels of a JAZ1:GUS …
AT5G45380	DUR3	0.556548	0.63967	0.247621	0.242068	0.0565516	0.0866802	0.0530826	0.0186347	834574	gene35020	NC_003076.8	18390942	18395928	4987	+	protein_coding	DUR3	.
AT5G53710	MGN6.6	16.581	20.9098	1.05828	1.10557	0.0539584	0.012701	1	1	835452	gene36101	NC_003076.8	21805071	21805812	742	-	protein_coding	MGN6.6	.
AT1G61340	FBS1	16.5027	25.1424	1.24761	1.28003	0.0113505	0.0228291	0.734616	0.0582351	842428	gene7128	NC_003070.9	22628264	22630020	1757	+	protein_coding	FBS1	Encodes a F-box protein induced by various biotic or abiotic stress.
AT1G01060	LHY	16.4707	17.1454	0.699848	1.01814	0.0125218	0.0178479	0.197559	1	839341	gene9	NC_003070.9	33365	37871	4507	-	protein_coding	LHY	LHY encodes a myb-related putative transcription factor involved in circadian rhythm along with another myb transcription factor CCA1
AT1G02400	GA2OX6	16.0701	19.9854	1.31831	0.862645	0.0083949	0.013153	0.328721	0.057238	839508	gene183	NC_003070.9	486800	489651	2852	+	protein_coding	GA2OX6	Encodes a gibberellin 2-oxidase that acts on C19 gibberellins but not C20 gibberellins.
AT3G45710	AT3G45710	0.553464	0.486838	0.419993	0.309896	0.0181704	0.0141676	0.0530826	0.0185273	823713	gene21290	NC_003074.8	16782588	16784772	2185	+	protein_coding	.	.
AT4G22620	SAUR34	16.002	13.9924	9.50272	9.18719	0.0206023	0.0247642	0.15677	0.0302096	828358	gene27197	NC_003075.7	11907355	11908357	1003	+	protein_coding	SAUR34	.
AT4G06746	RAP2.9	15.8043	13.6902	2.70282	5.05943	0.0111769	0.041716	0.106242	0.0768392	826148	gene24809	NC_003075.7	4073717	4074735	1019	-	protein_coding	RAP2.9	encodes a member of the DREB subfamily A-5 of ERF/AP2 transcription factor family (RAP2.9). The protein contains one AP2 domain. There are 16 members in this subfamily including RAP2.1 and RAP2.10.
AT4G20970	T13K14.130	15.619	13.9723	8.11131	5.25706	0.0286267	0.0353712	0.0612868	0.0129816	827844	gene26963	NC_003075.7	11215112	11216432	1321	+	protein_coding	T13K14.130	.
AT4G14580	CIPK4	0.551218	0.491369	0.47327	0.427827	0.0131198	0.0568571	0.0530826	0.0205715	827106	gene26047	NC_003075.7	8367663	8369312	1650	-	protein_coding	CIPK4	CBL-interacting protein kinase
AT5G58770	cPT4	15.3067	10.9648	0.990688	1.08533	0.0265149	0.0159562	1	0.468768	835991	gene36760	NC_003076.8	23734273	23735767	1495	+	protein_coding	cPT4	.
AT2G36590	ProT3	15.2363	36.3079	1.18586	1.27059	0.0182021	0.0169167	0.230287	0.491207	818232	gene14477	NC_003071.7	15343006	15345673	2668	-	protein_coding	ProT3	Encodes a proline transporter with affinity for gly betaine, proline, and GABA. Protein is expressed in leaves, flowers and siliques but to a much lesser extent in roots.
AT2G26150	HSFA2	14.5296	3.81266	0.636295	1.86718	0.0305927	0.0943778	0.271999	0.0754954	817155	gene13121	NC_003071.7	11135624	11137792	2169	+	protein_coding	HSFA2	member of Heat Stress Transcription Factor (Hsf) family. Involved in response to misfolded protein accumulation in the cytosol. Regulated by alternative splicing and non-sense-mediated decay.
AT1G51850	T14L22.6	0.551058	0.552245	0.26716	0.228551	0.0393381	0.0491122	0.0530826	0.0222497	841612	gene5975	NC_003070.9	19252811	19256927	4117	-	protein_coding	T14L22.6	.
AT5G66690	UGT72E2	0.410482	0.402629	0.450054	0.477553	0.0182021	0.0197493	0.0530826	0.0506963	836802	gene37767	NC_003076.8	26625049	26626822	1774	+	protein_coding	UGT72E2	UGT72E2 is an UDPG:coniferyl alcohol glucosyltransferase which glucosylates sinapyl- and coniferyl aldehydes as well as sinapyl- and coniferyl alcohol. The enzyme is thought to be involved in lignin metabolism. A knockdown mutant line (72E2KD) was obtained using RNAi silencing. A twofold reduction in coniferyl alcohol 4-<i>O</i>-glucoside and sinapyl alcohol 4-<i>O</i>-glucoside was detected in t…
AT1G78070	F28K19.28	14.2114	14.3982	1.89227	1.60785	0.0164626	0.0155084	0.245142	0.048204	844142	gene9329	NC_003070.9	29354944	29359032	4089	+	protein_coding	F28K19.28	.
AT1G05000	PFA-DSP1	0.380244	0.539909	0.398634	0.475964	0.0133306	0.0233877	0.0530826	0.024323	839348	gene522	NC_003070.9	1425539	1428869	3331	+	protein_coding	PFA-DSP1	Encodes an atypical dual-specificity phosphatase.
AT4G11890	ARCK1	13.6998	13.6793	1.10558	1.01906	0.0305045	0.0178479	0.6887	0.686581	826796	gene25629	NC_003075.7	7147865	7149942	2078	+	protein_coding	ARCK1	Encodes a receptor-like cytosolic kinase ARCK1. Negatively controls abscisic acid and osmotic stress signal transduction.
AT5G57685	GDU3	0.380024	0.343796	0.295829	0.452925	0.0517143	0.0524543	0.0530826	0.0627138	835875	gene36619	NC_003076.8	23365805	23367063	1259	-	protein_coding	GDU3	Encodes a member of the GDU (glutamine dumper) family proteins involved in amino acid export: At4g31730 (GDU1), At4g25760 (GDU2), At5g57685 (GDU3), At2g24762 (GDU4), At5g24920 (GDU5), At3g30725 (GDU6) and At5g38770 (GDU7).
AT2G22122	AT2G22122	0.357538	0.409321	0.102495	0.123328	0.0535209	0.0622978	0.0530826	0.0312159	2745552	gene12561	NC_003071.7	9403067	9403835	769	+	protein_coding	.	.
AT1G26770	EXPA10	13.3274	6.74832	1.96205	1.48097	0.00890394	0.015525	0.226371	0.0451278	839218	gene3290	NC_003070.9	9259432	9261313	1882	+	protein_coding	EXPA10	Encodes an expansin. Naming convention from the Expansin Working Group (Kende et al, Plant Mol Bio). Involved in the formation of nematode-induced syncytia in roots of Arabidopsis thaliana.
AT1G01520	ASG4	13.1971	14.823	1.50226	1.36573	0.0127331	0.0208224	0.217569	0.410202	839337	gene67	NC_003070.9	190408	192436	2029	+	protein_coding	ASG4	.
AT3G24300	AMT1%3B3	0.355146	0.22237	0.195493	0.113588	0.0241551	0.0199446	0.0530826	0.0226321	822018	gene19119	NC_003074.8	8805519	8807460	1942	-	protein_coding	AMT1;3	Encodes a plasma membrane localized ammonium transporter.
AT2G20880	ERF53	13.161	15.0481	0.39455	0.660648	0.0152863	0.0155084	0.113173	0.115912	816622	gene12396	NC_003071.7	8985959	8987302	1344	+	protein_coding	ERF53	Encodes ERF53, a drought-induced transcription factor. Belongs to the AP2/ERF superfamily, and has a highly conserved AP2 domain. Regulates drought-responsive gene expressions by binding to the GCC box and/or dehydration-responsive element (DRE) in the promoter of downstream genes. Overexpression of AtERF53 driven by the CaMV35S promoter resulted in an unstable drought-tolerant phenotype in T2 tr…
AT3G28007	SWEET4	13.0395	12.2406	7.4104	15.8284	0.0134947	0.0337449	0.07754	0.0339172	822424	gene19660	NC_003074.8	10408073	10409977	1905	-	protein_coding	SWEET4	.
AT3G23150	ETR2	0.33637	0.39481	0.228215	0.429461	0.00999249	0.0194405	0.0530826	0.0357077	821891	gene18962	NC_003074.8	8254559	8257888	3330	+	protein_coding	ETR2	Involved in ethylene perception in Arabidopsis
AT3G50740	UGT72E1	0.326326	0.460351	0.167597	0.175527	0.01107	0.0157471	0.0530826	0.0233633	824238	gene21982	NC_003074.8	18855043	18857040	1998	-	protein_coding	UGT72E1	UGT72E1 is an UDPG:coniferyl alcohol glucosyltransferase which specifically glucosylates sinapyl- and coniferyl aldehydes. The enzyme is thought to be involved in lignin metabolism.
AT2G43620	F18O19.27	12.9174	15.8649	4.46087	2.61331	0.0172376	0.0213482	0.231653	0.109929	818964	gene15424	NC_003071.7	18093694	18095093	1400	-	protein_coding	F18O19.27	.
AT5G23210	SCPL34	0.300605	0.435719	0.357373	0.437179	0.0183551	0.020325	0.0530826	0.0252206	832385	gene32129	NC_003076.8	7810645	7815089	4445	+	protein_coding	SCPL34	.
AT3G21150	BBX32	12.7773	14.7673	0.940415	0.969335	0.0150256	0.0229877	0.830587	1	821667	gene18663	NC_003074.8	7412445	7413727	1283	-	protein_coding	BBX32	Encodes a protein with a B-box domain predicted to act as a transcription factor. Expression of the BBX32 gene is affected by monochromatic red light.
AT1G32450	NRT1.5	0.273794	0.329912	0.142246	0.0895506	0.0272703	0.0332338	0.0530826	0.0129816	840139	gene4081	NC_003070.9	11715147	11719988	4842	-	protein_coding	NRT1.5	Transmembrane nitrate transporter. Involved in xylem transport of nitrate from root to shoot. Induced in response to nitrate. Not involved in nitrate uptake. expressed in root pericycle cells.
AT5G61440	ACHT5	0.263212	0.348285	0.423391	0.461967	0.0161183	0.0204993	0.0530826	0.0608731	836265	gene37087	NC_003076.8	24707445	24709396	1952	+	protein_coding	ACHT5	Encodes a member of the thioredoxin family protein. Located in the chloroplast.
AT5G53250	AGP22	0.143315	0.269503	0.118716	0.0838608	0.0212691	0.0389914	0.0530826	0.0129816	835406	gene36047	NC_003076.8	21603569	21604414	846	+	protein_coding	AGP22	.
AT5G42380	CML37	12.3875	9.07714	1.32752	0.7689	0.0317578	0.0217012	0.424335	0.165349	834244	gene34591	NC_003076.8	16942447	16943820	1374	-	protein_coding	CML37	.
AT1G59860	F23H11.18	12.2996	1.984	0.468793	0.981844	0.0274637	0.032924	0.165153	1	842280	gene6928	NC_003070.9	22031343	22032250	908	+	protein_coding	F23H11.18	.
AT1G03870	FLA9	0.0819074	0.202437	0.182378	0.118226	0.0171802	0.0216914	0.0530826	0.0233633	839384	gene375	NC_003070.9	982381	983544	1164	-	protein_coding	FLA9	fasciclin-like arabinogalactan-protein 9 (Fla9)
AT4G16760	ACX1	5.87886	5.50829	4.51737	4.53036	0.0168417	0.0137479	0.0532551	0.0281236	827381	gene26385	NC_003075.7	9424534	9428895	4362	-	protein_coding	ACX1	Encodes a medium to long-chain acyl-CoA oxidase. Catalyzes the first step of fatty acid beta-oxidation. Involved in jasmonate biosynthesis. Gene expression is induced by wounding, drought stress, abscisic acid, and jasmonate.
AT1G09500	F14J9.16	12.187	19.3589	1.69098	1.68203	0.027775	0.00476303	0.374055	0.104653	837475	gene1119	NC_003070.9	3066674	3068796	2123	+	protein_coding	F14J9.16	similar to Eucalyptus gunnii alcohol dehydrogenase of unknown physiological function (GI:1143445), Vigna unguiculata (gi:1854445), NOT a cinnamyl-alcohol dehydrogenase
AT3G14440	NCED3	12.1053	14.1728	1.98787	3.16709	0.00401839	0.0122452	0.0989016	0.0252206	820667	gene17760	NC_003074.8	4831286	4834015	2730	-	protein_coding	NCED3	Encodes 9-<i>cis</i>-epoxycarotenoid dioxygenase, a key enzyme in the biosynthesis of abscisic acid. Regulated in response to drought and salinity. Expressed in roots, flowers and seeds. Localized to the chloroplast stroma and thylakoid membrane.
AT3G06390	CASP-like protein 1D2	0.649289	0.89397	0.189578	0.403937	0.0673823	0.322567	0.0532551	0.0268778	819813	gene16736	NC_003074.8	1938335	1939853	1519	-	protein_coding	CASP-like protein 1D2	.
AT1G69480	F10D13.13	11.9905	14.6593	5.99369	5.58564	0.0152863	0.0359171	0.0677431	0.0244981	843280	gene8227	NC_003070.9	26113990	26117955	3966	-	protein_coding	F10D13.13	.
AT4G21680	NRT1.8	11.9704	2.46861	1.47873	0.77811	0.0265052	0.0885431	0.185017	0.24608	828255	gene27061	NC_003075.7	11517353	11519805	2453	-	protein_coding	NRT1.8	Encodes a nitrate transporter (NRT1.8). Functions in nitrate removal from the xylem sap. Mediates cadmium tolerance.
AT2G34770	FAH1	0.639463	0.786252	0.251235	0.186466	0.0417912	0.0824392	0.0532551	0.0256213	818042	gene28975	NC_003071.7	14665667	14668250	2584	+	protein_coding	FAH1	encodes a fatty acid hydroxylase, required for the AtBI-1-mediated suppression of programmed cell death.
AT5G10430	AGP4	0.20112	0.360265	0.375621	0.331213	0.0367805	0.0487861	0.0532551	0.0366825	830907	gene30636	NC_003076.8	3277488	3278461	974	-	protein_coding	AGP4	Encodes arabinogalactan-protein (AGP4).
AT2G17840	ERD7	17.1402	16.2523	2.76221	1.76434	0.00773773	0.0137479	0.0533317	0.0557458	816293	gene12000	NC_003071.7	7755605	7757929	2325	-	protein_coding	ERD7	Identified as drought-inducible gene by differential hybridization. Upregulated by high light, drought, cold and salt stress determined by microarray analysis.
AT1G22400	UGT85A1	11.8589	3.0185	1.62093	1.63497	0.0194406	0.0228435	0.177087	0.11423	838846	gene2820	NC_003070.9	7903660	7906969	3310	-	protein_coding	UGT85A1	.
AT5G15190	F8M21.80	8.10036	9.75621	3.95633	4.60956	0.0123761	0.0331971	0.0533317	0.0808134	831371	gene31182	NC_003076.8	4932708	4933620	913	-	protein_coding	F8M21.80	.
AT1G27730	STZ	11.8228	10.9742	1.10234	0.896935	0.00401839	0.0285462	0.22335	0.300903	839666	gene3424	NC_003070.9	9648021	9649323	1303	-	protein_coding	STZ	Related to Cys2/His2-type zinc-finger proteins found in higher plants. Compensated for a subset of calcineurin deficiency in yeast. Salt tolerance produced by ZAT10 appeared to be partially dependent on ENA1/PMR2, a P-type ATPase required for Li+ and Na+ efflux in yeast. The protein is localized to the nucleus, acts as a transcriptional repressor and is responsive to chitin oligomers. Also involv…
AT1G02850	BGLU11	11.7239	9.40336	1.54321	1.7881	0.0141469	0.0137479	0.424346	0.0659365	839435	gene242	NC_003070.9	630374	633420	3047	+	protein_coding	BGLU11	.
AT3G51450	AT3G51450	7.21479	9.14597	3.88377	2.07482	0.0202349	0.0284774	0.0533317	0.0351372	824308	gene22076	NC_003074.8	19090947	19092511	1565	+	protein_coding	.	.
AT4G30470	F17I23.190	11.6673	8.8567	1.36313	1.62782	0.0112683	0.0189592	0.734616	0.0290116	829170	gene28224	NC_003075.7	14894073	14896844	2772	+	protein_coding	F17I23.190	.
AT5G39580	MIJ24.50	5.49872	6.15114	5.42798	2.0456	0.0186844	0.0257214	0.0533317	0.0736242	833954	gene34225	NC_003076.8	15847065	15849141	2077	-	protein_coding	MIJ24.50	.
AT1G58360	AAP1	4.61474	4.95265	4.76348	5.41689	0.0106072	0.0122452	0.0533317	0.0243682	842205	gene6838	NC_003070.9	21676388	21680519	4132	+	protein_coding	AAP1	Encodes AAP1 (amino acid permease 1), a neutral amino acid transporter expressed in seeds. Functions in amino acid uptake into embryos. The transporter also functions in acquisition of glutamate and neutral amino acids by the root.
AT2G39050	EULS3	4.26581	4.44664	4.63259	5.53164	0.0185657	0.0155084	0.0533317	0.0224682	818491	gene14784	NC_003071.7	16303295	16305633	2339	+	protein_coding	EULS3	Encodes a nucleocytoplasmic lectin that is capable of binding carbohydrates.
AT4G33050	EDA39	3.52227	4.94939	0.451746	0.249441	0.0153144	0.0400185	0.0533317	0.0268778	829442	gene28561	NC_003075.7	15944199	15947072	2874	-	protein_coding	EDA39	Encodes a calmodulin-binding protein involved in stomatal movement.
AT4G38810	T9A14.90	3.4108	3.82187	3.53178	3.79333	0.0131198	0.0137479	0.0533317	0.0323997	830036	gene29300	NC_003075.7	18115283	18119160	3878	-	protein_coding	T9A14.90	.
AT4G26200	ACS7	1.93592	1.86365	4.44757	2.56349	0.0504304	0.161269	0.0533317	0.0685949	828726	gene27670	NC_003075.7	13275200	13277188	1989	+	protein_coding	ACS7	Member of a family of proteins in Arabidopsis that encode 1-Amino-cyclopropane-1-carboxylate synthase, an enzyme involved in ethylene biosynthesis. Not expressed in response to IAA.
AT1G72900	F3N23.10	11.2365	5.30838	0.533329	0.504159	0.00972893	0.0301165	0.139222	0.0846861	843621	gene8660	NC_003070.9	27432178	27433782	1605	+	protein_coding	F3N23.10	.
AT5G23190	CYP86B1	1.79817	1.66641	2.36455	2.07712	0.0469485	0.106947	0.0533317	0.0244981	832383	gene32127	NC_003076.8	7803141	7805968	2828	-	protein_coding	CYP86B1	cytochrome P450 CYP86B1, nuclear gene for chloroplast product. CYP86B1 is a very long chain fatty acid hydroxylase specifically involved in polyester monomer biosynthesis during the course of plant development.
AT5G63980	SAL1	1.38359	1.41341	2.3104	2.45228	0.0610456	0.0532625	0.0533317	0.0222497	836519	gene37397	NC_003076.8	25610002	25611802	1801	+	protein_coding	SAL1	Encodes a bifunctional protein that has 3'(2'),5'-bisphosphate nucleotidase and inositol polyphosphate 1-phosphatase activities and rescues sulfur assimilation mutants in yeast. It is involved in the response to cold, drought (negative regulator of drought tolerance), and ABA. Mutants in this gene exhibit enhanced induction of stress genes in response to cold, ABA, salt and dehydration due to hig…
AT2G36460	FBA6	1.1889	1.12456	0.486784	0.797386	0.0150074	0.0184272	0.0533317	0.0501485	818220	gene14463	NC_003071.7	15296613	15298754	2142	-	protein_coding	FBA6	.
AT1G13080	CYP71B2	1.02876	1.2004	0.21017	0.353705	0.544133	0.0589078	0.0533317	0.0310399	837865	gene1605	NC_003070.9	4459002	4460996	1995	+	protein_coding	CYP71B2	cytochrome P450 monooxygenase
AT1G03780	TPX2	1.01955	1.09531	0.201475	0.171431	1	0.782245	0.0533317	0.0232099	839140	gene7762	NC_003070.9	947520	951850	4331	-	protein_coding	TPX2	Homolog of vertebrate TPX2. Protein has three domains involved in nuclear targeting, one in nuclear export and two in microtubule binding. Involved in mitotic spindle assembly during late prophase and early prometaphase.
AT1G12080	F12F1.4	0.695928	0.736905	0.278137	0.34039	0.0419569	0.0545982	0.0533317	0.033498	837760	gene1476	NC_003070.9	4084162	4085185	1024	+	protein_coding	F12F1.4	.
AT2G29750	UGT71C1	0.623264	0.704966	0.466295	0.461096	0.0112615	0.0526296	0.0533317	0.0450803	817525	gene13574	NC_003071.7	12709721	12711725	2005	+	protein_coding	UGT71C1	.
AT4G14130	XTH15	0.180084	0.571906	0.178387	0.210411	0.0128819	0.0213095	0.0533317	0.0233633	827051	gene25974	NC_003075.7	8137020	8138392	1373	-	protein_coding	XTH15	xyloglucan endotransglycosylase-related protein (XTR7)
AT2G23540	F26B6.19	0.732982	0.718949	0.454596	0.444163	0.0923925	0.0888691	0.0535388	0.0303347	816886	gene12757	NC_003071.7	10024150	10026258	2109	+	protein_coding	F26B6.19	.
AT4G19230	CYP707A1	9.01069	8.14168	4.24172	3.59639	0.0158481	0.0213095	0.0536208	0.0645039	827663	gene26734	NC_003075.7	10521259	10523961	2703	+	protein_coding	CYP707A1	Encodes a protein with ABA 8'-hydroxylase activity, involved in ABA catabolism. Member of the CYP707A gene family. CYP707A1 appears to play an important role in determining the ABA levels in dry seeds. Gene involved in postgermination growth. Overexpression of CYP707A1 leads to a decrease in ABA levels and a reduction in after-ripening period to break dormancy.
AT1G56660	F25P12.91	10.9926	14.221	1.19709	0.603854	0.0368174	0.0685926	0.938056	0.0400209	842121	gene6639	NC_003070.9	21237839	21241014	3176	+	protein_coding	F25P12.91	.
AT3G02045	AT3G02045	10.9342	2.21364	0.0722581	1.95171	0.636904	0.67153	0.244182	0.972659	28718539	gene16939	NC_003074.8	2508900	2509019	120	+	snoRNA	.	snoR130
AT3G44720	ADT4	2.34503	2.72676	2.619	1.8906	0.0182965	0.0164376	0.0538396	0.0462526	823601	gene21130	NC_003074.8	16271511	16273413	1903	+	protein_coding	ADT4	Encodes a plastid-localized arogenate dehydratase involved in phenylalanine biosynthesis. Not less than six genes encoding ADT were identified in the Arabidopsis genome: ADT1 [At1g11790]; ADT2 [At3g07630]; ADT3 [At2g27820]; ADT4 [At3g44720]; ADT5 [At5g22630]; and ADT6 [At1g08250].
AT3G51750	AT3G51750	6.77991	6.26631	14.1718	17.6381	0.0194243	0.039255	0.0539979	0.0406315	824338	gene22112	NC_003074.8	19196362	19197356	995	-	protein_coding	.	.
AT1G55020	LOX1	3.16649	3.19039	3.63009	5.01823	0.0206621	0.0338335	0.0539979	0.0268778	841944	gene6412	NC_003070.9	20525654	20530468	4815	+	protein_coding	LOX1	lipoxygenase, a defense gene conferring resistance Xanthomonas campestris
AT5G64230	MSJ1.7	10.7009	3.99904	1.93805	2.49267	0.0234608	0.012701	0.248971	0.0586807	836544	gene37424	NC_003076.8	25692425	25694137	1713	+	protein_coding	MSJ1.7	.
AT5G52640	HSP90.1	10.6481	4.62439	0.501037	1.99611	0.0179723	0.0404278	0.148581	0.0360821	835341	gene35970	NC_003076.8	21352557	21355147	2591	+	protein_coding	HSP90.1	Encodes a cytosolic heat shock protein AtHSP90.1. AtHSP90.1 interacts with disease resistance signaling components SGT1b and RAR1 and is required for RPS2-mediated resistance.
AT2G34600	JAZ7	10.5953	7.33942	0.839161	0.475202	0.0503117	0.02632	0.734616	0.0251739	818025	gene14210	NC_003071.7	14573030	14573952	923	+	protein_coding	JAZ7	.
AT4G14550	IAA14	0.60145	0.482475	0.464998	0.451172	0.0263375	0.0176086	0.0539979	0.0252206	827102	gene26043	NC_003075.7	8347822	8350263	2442	-	protein_coding	IAA14	IAA14 is a member of the Aux/IAA protein family. Involved in lateral root development. Gain of function mutation decreases auxin-inducible gene expression. Protein is localized to the nucleus. Expressed in stele and root tip epidermis. Functions as a negative regulator of ARF7/19.
AT4G22666	AT4G22666	0.203045	0.314678	0.216309	0.140439	0.0237073	0.0275642	0.0539979	0.0265673	3770028	gene27203	NC_003075.7	11917057	11917959	903	+	protein_coding	.	.
AT2G36800	DOGT1	10.5088	6.97858	1.46376	1.45659	0.0104467	0.0155084	0.257771	0.428818	818252	gene14505	NC_003071.7	15423172	15425129	1958	-	protein_coding	DOGT1	Encodes a DON-Glucosyltransferase. The UGT73C5 glucosylates both brassinolide and castasterone in the 23-O position. The enzyme is presumably involved in the homeostasis of those steroid hormones hence regulating BR activity. Transgenic plants overexpressing UGT73C5 show a typical BR-deficient phenotype.
AT1G80110	PP2-B11	5.18739	6.03653	10.6501	11.9419	0.0113893	0.0185923	0.055406	0.0421622	844351	gene9590	NC_003070.9	30135024	30136956	1933	+	protein_coding	PP2-B11	.
AT1G64160	DIR5	4.76103	5.52367	8.67992	4.30328	0.0281927	0.0650078	0.0559041	0.111104	842720	gene7513	NC_003070.9	23813943	23814839	897	+	protein_coding	DIR5	Encodes a dirigent protein involved in the synthesis of (-)pinoresinol. Dirigent proteins impart stereoselectivity on the phenoxy radical coupling reaction yielding optically active lignans from two molecules of coniferyl alcohol.
AT4G19720	T16H5.80	2.54701	2.05139	3.02675	2.36311	0.0525968	0.163541	0.0559041	0.0563543	827716	gene26801	NC_003075.7	10729966	10731808	1843	-	protein_coding	T16H5.80	.
AT5G48930	HCT	2.00292	1.71231	2.20893	2.27346	0.021413	0.0354436	0.0559041	0.022353	834951	gene35484	NC_003076.8	19836299	19838235	1937	-	protein_coding	HCT	At5g48930 has been shown to encode for the hydroxycinnamoyl-Coenzyme A shikimate/quinate hydroxycinnamoyltransferase (HCT) both synthesizing and catabolizing the hydroxycinnamoylesters (coumaroyl/caffeoyl shikimate and quinate) involved in the phenylpropanoid pathway. Influence on the accumulation of flavonoids which in turn inhibit auxin transport and reduce plant growth.
AT2G47485	AT2G47485	10.37	10.0722	1.35884	1.44862	0.0227863	0.0175136	0.327395	0.099386	2745593	gene15930	NC_003071.7	19485809	19486833	1025	+	protein_coding	.	.
AT1G77380	AAP3	1.70438	2.19414	4.27204	5.01258	0.0742647	0.0439654	0.0559041	0.0251739	844074	gene9238	NC_003070.9	29074879	29077390	2512	-	protein_coding	AAP3	Amino acid permease which transports basic amino acids.
AT4G12735	AT4G12735	10.2991	2.41122	3.29538	0.802462	0.0370517	0.0404115	0.225162	0.970014	2745703	gene25745	NC_003075.7	7493716	7494234	519	-	protein_coding	.	.
AT1G05675	AT1G05675	10.2923	22.3208	2.31877	1.38518	0.0217784	0.0207844	0.0692425	0.160033	10723139	gene623	NC_003070.9	1701116	1702749	1634	-	protein_coding	.	.
AT5G59780	MYB59	0.557519	0.789389	0.280618	0.409372	0.103456	0.27676	0.0559041	0.0238994	836099	gene36887	NC_003076.8	24081868	24083562	1695	-	protein_coding	MYB59	Encodes a putative transcription factor (MYB59).
AT5G59820	RHL41	10.2475	7.16759	1.86114	1.69734	0.00773773	0.0522955	0.209662	0.10949	836103	gene36892	NC_003076.8	24102814	24103794	981	+	protein_coding	RHL41	Encodes a zinc finger protein involved in high light and cold acclimation. Overexpression of this putative transcription factor increases the expression level of 9 cold-responsive genes and represses the expression level of 15 cold-responsive genes, including CBF genes. Also, lines overexpressing this gene exhibits a small but reproducible increase in freeze tolerance. Because of the repression o…
AT5G17760	MVA3.110	4.68531	4.74316	3.96193	4.92576	0.0337927	0.013153	0.0566917	0.0479088	831644	gene31506	NC_003076.8	5860350	5862475	2126	-	protein_coding	MVA3.110	.
AT2G36770	F13K3.17	10.2259	6.90853	1.77704	2.33418	0.0244283	0.0230042	0.351881	0.140544	818249	gene14501	NC_003071.7	15415077	15416845	1769	-	protein_coding	F13K3.17	.
AT3G49960	AT3G49960	0.190544	0.351039	0.330771	0.170026	0.0486572	0.0792452	0.0566917	0.0222497	824158	gene21886	NC_003074.8	18524084	18525792	1709	-	protein_coding	.	Its expression is enriched in root hair cells (compared to non-root hair cells) and this enrichment is associated with increase in the transcription-associated mark trimethylation of H3 lysine 4 (H3K4me3) and decrease in the Polycomb silencing-associated mark trimethylation of H3 lysine 27 (H3K27me3) in root hair cells relative to non-root hair cells.
AT3G12580	HSP70	10.1883	4.81955	0.961854	2.18008	0.0083949	0.013877	1	0.0298803	820438	gene17472	NC_003074.8	3991117	3993886	2770	-	protein_coding	HSP70	.
AT5G65300	MNA5.2	10.1474	14.2429	1.91938	1.82197	0.0139934	0.0506229	0.166922	0.0378262	836655	gene37566	NC_003076.8	26095143	26096114	972	-	protein_coding	MNA5.2	.
AT3G63380	ACA12	10.1447	6.68776	3.53882	2.03526	0.01327	0.0133826	0.0612868	0.0309354	825513	gene23615	NC_003074.8	23406484	23410360	3877	-	protein_coding	ACA12	.
AT2G37180	RD28	10.1381	15.3341	1.15066	2.07704	0.01107	0.0206019	0.496815	0.0462622	818294	gene14555	NC_003071.7	15617635	15619155	1521	+	protein_coding	RD28	a member of the plasma membrane intrinsic protein PIP2. functions as aquaporin and is involved in dessication.
AT1G74310	HSP101	10.1322	2.3753	0.514364	1.74467	0.00549788	0.0225806	0.136015	0.0726494	843771	gene8835	NC_003070.9	27936508	27940369	3862	-	protein_coding	HSP101	Encodes ClpB1, which belongs to the Casein lytic proteinase/heat shock protein 100 (Clp/Hsp100) family. Involved in refolding of proteins which form aggregates under heat stress. Also known as AtHsp101. AtHsp101 is a cytosolic heat shock protein required for acclimation to high temperature.
AT1G33055	AT1G33055	0.321252	0.336324	0.151065	0.375957	0.02245	0.0240793	0.0569988	0.0382059	840201	gene4164	NC_003070.9	11971308	11972580	1273	-	protein_coding	.	.
AT3G50910	AT3G50910	3.97193	3.83486	2.75344	2.53948	0.0223879	0.041426	0.057081	0.0226321	824255	gene22008	NC_003074.8	18919327	18922301	2975	+	protein_coding	.	.
AT4G23400	PIP1%3B5	0.374969	0.483795	0.213054	0.237286	0.0407209	0.0572536	0.057081	0.0330811	828439	gene27297	NC_003075.7	12220641	12222468	1828	+	protein_coding	PIP1;5	.
AT1G55740	SIP1	4.67673	6.02005	6.8525	6.03194	0.00649498	0.0137747	0.0579376	0.0336269	842023	gene34332	NC_003070.9	20835256	20838778	3523	-	protein_coding	SIP1	.
AT3G27220	AT3G27220	0.489241	0.555884	0.250747	0.382924	0.0255217	0.0526296	0.0579376	0.0338773	822341	gene19540	NC_003074.8	10051069	10053761	2693	-	protein_coding	.	.
AT4G15248	BBX30	9.97976	12.6421	3.73792	4.43392	0.0250477	0.0358115	0.0846144	0.089168	3769879	gene26158	NC_003075.7	8708841	8709482	642	+	protein_coding	BBX30	.
AT3G25190	AtVTL5	0.913799	0.730037	0.298994	0.234994	0.190243	0.0947763	0.0582837	0.0347531	822112	gene19249	NC_003074.8	9174398	9175866	1469	+	protein_coding	AtVTL5	The gene encodes nodulin-like21 whose transcript abundance was repressed under conditions of Fe-deficient growth.
AT4G29700	T16L4.210	1.43604	1.47308	2.23775	1.87879	0.0433608	0.0448839	0.0594789	0.0360625	829091	gene28130	NC_003075.7	14543138	14545310	2173	-	protein_coding	T16L4.210	.
AT4G40010	SNRK2.7	3.53792	3.2705	6.3058	5.73335	0.0286691	0.0363659	0.059672	0.0374513	830162	gene29462	NC_003075.7	18548444	18551183	2740	-	protein_coding	SNRK2.7	encodes a member of SNF1-related protein kinases (SnRK2) whose activity is activated by ionic (salt) and non-ionic (mannitol) osmotic stress.
AT2G47180	GolS1	9.80841	8.09747	1.65159	2.83299	0.0106072	0.0189678	0.191517	0.027565	819331	gene15889	NC_003071.7	19368798	19370478	1681	-	protein_coding	GolS1	GolS1 is a galactinol synthase that catalyzes the formation of galactinol from UDP-galactose and myo-inositol. GolS1 transcript levels rise in response to methyl viologen, an oxidative damage-inducing agent. Plants over-expressing GolS1 have increased tolerance to salt, chilling, and high-light stress.
AT4G25470	CBF2	4.25749	3.7078	0.457334	0.366178	0.027999	0.0449018	0.0604208	0.0278724	828651	gene27576	NC_003075.7	13015250	13016235	986	-	protein_coding	CBF2	Encodes a member of the DREB subfamily A-1 of ERF/AP2 transcription factor family (CBF2). The protein contains one AP2 domain. There are six members in this subfamily, including CBF1, CBF2, and CBF3. This gene is involved in response to low temperature, abscisic acid, and circadian rhythm. Overexpressing this gene leads to increased freeze tolerance and induces the expression level of 85 cold-ind…
AT1G19020	F14D16.17	9.75395	12.663	1.84993	1.01941	0.0339332	0.0448958	0.208323	0.686581	838483	gene2370	NC_003070.9	6568002	6568705	704	+	protein_coding	F14D16.17	.
AT4G17340	TIP2%3B2	0.964905	1.69118	0.281205	0.462332	0.851132	0.0455594	0.0604208	0.0406968	827446	gene26467	NC_003075.7	9698940	9700472	1533	+	protein_coding	TIP2;2	.
AT2G41280	M10	9.71151	16.214	3.7479	2.41664	0.0252613	0.0919415	0.43019	0.298636	818727	gene15095	NC_003071.7	17209697	17210423	727	+	protein_coding	M10	Encodes a hydrophilic protein similar to Late Embryogenesis Activated (LEA) proteins expressed during embryogenesis, which are thought to be involved in the acquisition of dessication tolerance.
AT3G21520	DMP1	9.69494	11.4588	4.44844	10.0078	0.0356333	0.0402474	0.3299	0.0233633	821706	gene18720	NC_003074.8	7581959	7582793	835	+	protein_coding	DMP1	Encodes a protein is directly or indirectly involved in membrane fission during breakdown of the ER and the tonoplast during leaf senescence and in membrane fusion during vacuole biogenesis in roots.
AT3G56260	AT3G56260	9.68415	10.9227	1.15023	1.69311	0.015304	0.013153	0.662571	0.148703	824792	gene22692	NC_003074.8	20867970	20869024	1055	-	protein_coding	.	.
AT3G21890	BBX31	9.67125	11.8915	1.40056	1.67362	0.0096896	0.0480469	0.707523	0.235767	821744	gene18771	NC_003074.8	7708833	7709933	1101	-	protein_coding	BBX31	.
AT1G49450	F13F21.11	10.7635	13.5795	6.74402	9.45347	0.0221941	0.0216914	0.0605165	0.021161	841369	gene5676	NC_003070.9	18305445	18307557	2113	+	protein_coding	F13F21.11	.
AT1G66500	F28G11.6	9.61262	8.05176	0.827046	0.66263	0.0128095	0.0216914	0.14901	0.0664038	842968	gene7833	NC_003070.9	24811080	24812661	1582	-	protein_coding	F28G11.6	.
AT5G15120	F2G14.1	0.153924	0.215608	0.122924	0.232714	0.00765018	0.0121514	0.0605165	0.0248119	831364	gene31173	NC_003076.8	4898641	4900734	2094	+	protein_coding	F2G14.1	.
AT4G22530	F7K2.110	8.64112	4.7221	3.73082	3.21235	0.01107	0.0277008	0.0605216	0.0414411	828348	gene27185	NC_003075.7	11858444	11860426	1983	-	protein_coding	F7K2.110	.
AT3G16330	AT3G16330	6.04193	3.44807	6.02441	5.65004	0.0386376	0.0137479	0.0612868	0.0222497	820880	gene18016	NC_003074.8	5535124	5536237	1114	+	protein_coding	.	.
AT5G57050	ABI2	5.02676	4.72197	2.68012	4.39386	0.01327	0.0141211	0.0612868	0.0360821	835809	gene36545	NC_003076.8	23087122	23089631	2510	+	protein_coding	ABI2	Encodes a protein phosphatase 2C and is involved in ABA signal transduction. Binds fibrillin preprotein in vitro and in vivo.
AT3G03640	BGLU25	3.14654	3.01276	3.91306	4.68476	0.0211429	0.0191958	0.0612868	0.0233633	821201	gene16355	NC_003074.8	880988	884157	3170	+	protein_coding	BGLU25	Encodes beta-glucosidase (GLUC).
AT5G24770	VSP2	9.3954	18.4242	4.25478	11.5418	0.0142785	0.01749	0.239312	0.0360821	832546	gene32326	NC_003076.8	8500468	8502224	1757	-	protein_coding	VSP2	Has acid phosphatase activity dependent on the presence of divalent cations (Mg2+, Co2+, Zn2+, Mn2+) and anti-insect activity. Insects fed with the protein show a retarded development. Induced in response to abscisic acid, jasmonic acid, salt, water deficiency and wounding.
AT4G29690	T16L4.200	3.07337	2.53443	3.80375	2.71031	0.0223362	0.0577722	0.0612868	0.0318384	829090	gene28128	NC_003075.7	14540878	14542565	1688	-	protein_coding	T16L4.200	.
AT5G05995	AT5G05995	9.32655	6.67996	0.858499	0.466712	0.0543751	0.0185261	0.734616	0.0404869	28720771	gene34237	NC_003076.8	15883195	15884130	936	-	lncRNA	.	Natural antisense transcript overlaps with AT5G39670
AT3G06500	A/N-InvC	9.28243	7.38725	1.56881	1.61367	0.0161211	0.0219053	0.0753454	0.0401921	819828	gene16759	NC_003074.8	2011993	2015831	3839	+	protein_coding	A/N-InvC	Encodes an alkaline/neutral invertase which localizes in mitochondria. It may be modulating hormone balance in relation to the radicle emergence. Mutants display severely reduced shoot growth and reduced oxygen consumption. Mutant root development is not affected as reported for A/N-InvA mutant (inva) plants.
AT3G23550	AT3G23550	9.26876	7.25039	4.63199	3.97876	0.0208972	0.0202425	0.0737103	0.0532424	821934	gene19015	NC_003074.8	8448273	8450799	2527	-	protein_coding	.	.
AT4G30530	GGP1	2.20471	3.24145	2.87479	2.31318	0.0158481	0.0328413	0.0612868	0.0555981	829176	gene28231	NC_003075.7	14920376	14922519	2144	+	protein_coding	GGP1	Encodes a gamma-glutamyl peptidase, outside the GGT family, that can hydrolyze gamma-glutamyl peptide bonds.
AT1G19900	F6F9.4	0.320369	0.489953	0.103958	0.312043	0.0099945	0.0183343	0.0612868	0.0318815	838578	gene2482	NC_003070.9	6906899	6908805	1907	-	protein_coding	F6F9.4	.
AT2G31945	AT2G31945	9.21693	6.6193	1.86151	3.27488	0.0541385	0.044419	0.268936	0.0347217	817753	gene13857	NC_003071.7	13581534	13582366	833	+	protein_coding	.	.
AT3G53180	NodGS	4.17957	4.37956	3.25147	3.21836	0.014208	0.0189592	0.0613019	0.0233518	824484	gene22305	NC_003074.8	19706820	19711460	4641	+	protein_coding	NodGS	Encodes a protein that is the product of a fusion gene with a C-terminal GSI like sequence and an N-terminal part sharing homology with nodulins. It self-assembles into oligomers and its expression is increased in response to flagellin treatment. The protein co-localizes with microtubules and binds gamma-tubulin. RNAi lines are affected in root morphogenesis.
AT5G05410	DREB2A	9.14887	7.5718	1.28098	1.43857	0.0170012	0.0216914	0.165763	0.0619062	830424	gene30044	NC_003076.8	1602205	1604112	1908	+	protein_coding	DREB2A	Encodes a transcription factor that specifically binds to DRE/CRT cis elements (responsive to drought and low-temperature stress). Belongs to the DREB subfamily A-2 of ERF/AP2 transcription factor family (DREB2A). There are eight members in this subfamily including DREB2B. The protein contains one AP2 domain. Overexpression of transcriptional activation domain of DREB2A resulted in significant dr…
AT4G11280	ACS6	9.08157	4.35845	0.682096	0.534453	0.00861626	0.0305981	0.0892739	0.0222995	826730	gene25541	NC_003075.7	6863979	6866116	2138	+	protein_coding	ACS6	encodes a a member of the 1-aminocyclopropane-1-carboxylate (ACC) synthase (S-adenosyl-L-methionine methylthioadenosine-lyase, EC 4.4.1.14) gene family
AT1G50960	GA2OX7	9.08099	5.71906	4.82999	4.15986	0.0190061	0.036518	0.0892739	0.0801161	841518	gene5864	NC_003070.9	18889473	18891838	2366	+	protein_coding	GA2OX7	Encodes a protein with gibberellin 2-oxidase activity which acts specifically on C-20 gibberellins. DDF1 binds to GA2OX7 and regulates its expression in response to salt stress.
AT1G75370	F1B16.10	2.10597	2.01557	2.3347	2.9218	0.0211429	0.016404	0.0613019	0.0298803	843873	gene8974	NC_003070.9	28276281	28280033	3753	-	protein_coding	F1B16.10	.
AT1G51830	T14L22.4	0.639067	0.705342	0.374421	0.334271	0.0508212	0.0864733	0.0613019	0.0265638	841610	gene5973	NC_003070.9	19242654	19246154	3501	-	protein_coding	T14L22.4	.
AT5G16970	AER	7.70676	6.2037	7.64159	6.47095	0.00752157	0.0185816	0.0615537	0.0330322	831560	gene31407	NC_003076.8	5575973	5578086	2114	-	protein_coding	AER	encodes a 2-alkenal reductase (EC 1.3.1.74), plays a key role in the detoxification of reactive carbonyls
AT1G76650	CML38	8.99601	11.0846	0.968751	0.677391	0.0149784	0.0209676	0.386157	0.0428045	843998	gene9132	NC_003070.9	28766750	28768138	1389	-	protein_coding	CML38	.
AT3G60415	AT3G60415	8.93818	7.58783	2.53134	1.3533	0.0274159	0.0410235	0.383052	0.348414	28719419	gene23219	NC_003074.8	22334424	22335858	1435	+	protein_coding	.	.
AT3G46670	UGT76E11	8.9236	5.74753	1.25799	1.19779	0.0149318	0.0159562	0.296767	0.158687	823820	gene21438	NC_003074.8	17192589	17194397	1809	-	protein_coding	UGT76E11	.
AT3G04000	T11I18.11	8.8952	4.91129	2.42596	2.74286	0.00972893	0.0345063	0.139619	0.0744652	819555	gene16406	NC_003074.8	1035238	1036672	1435	+	protein_coding	T11I18.11	ChlADR is an aldehyde reductase that catalyzes the reduction of the aldehyde carbonyl groups on saturated and alpha,beta-unsaturated aldehydes with more than 5 carbons in vitro. The N-terminal region of this protein directs GFP to the chloroplast where where ChlADR likely helps to maintain the photosynthetic process by detoxifying reactive carbonyls formed during lipid peroxidation. In addition, …
AT3G02535	AT3G02535	5.17467	4.78101	10	15.6714	0.0243943	0.0350303	0.0615537	0.0370599	28718580	gene17463	NC_003074.8	3967100	3967822	723	-	lncRNA	.	Natural antisense transcript overlaps with AT3G12510
AT2G17500	MJB20.6	4.05481	3.70038	2.72318	2.87286	0.0164655	0.0168402	0.0615537	0.0431343	816256	gene11957	NC_003071.7	7606728	7609278	2551	+	protein_coding	MJB20.6	.
AT2G46510	AIB	3.21968	3.7199	3.25416	2.16074	0.0217784	0.0244652	0.0615537	0.0353513	819262	gene15796	NC_003071.7	19090953	19093373	2421	-	protein_coding	AIB	Encodes a nuclear localized BLH domain containing transcriptional activator involved in response to ABA. Overexpression confers enhanced ABA responsiveness while loss of function mutants are ABA sensitive.
AT5G64401	AT5G64401	8.81764	5.23891	0.477254	0.262827	0.594795	0.441638	0.734616	0.488062	6241142	gene37444	NC_003076.8	25750441	25750602	162	-	protein_coding	.	.
AT1G33960	AIG1	8.81072	9.67342	0.977814	1.00378	0.01327	0.0137479	0.795694	1	840293	gene4283	NC_003070.9	12346138	12348733	2596	+	protein_coding	AIG1	Identified as a gene that is induced by avirulence gene avrRpt2 and RPS2 after infection with Pseudomonas syringae pv maculicola strain ES4326 carrying avrRpt2
AT3G19580	ZF2	8.68893	9.28761	1.77443	1.73879	0.0321392	0.0268225	0.321197	0.0553402	821495	gene18460	NC_003074.8	6802903	6804296	1394	-	protein_coding	ZF2	Encodes zinc finger protein. mRNA levels are upregulated in response to ABA, high salt, and mild dessication. The protein is localized to the nucleus and acts as a transcriptional repressor.
AT1G65310	XTH17	0.129004	0.344701	0.11191	0.108888	0.0284101	0.0395872	0.0615537	0.0238994	842839	gene7668	NC_003070.9	24257054	24258506	1453	+	protein_coding	XTH17	Encodes a xyloglucan endotransglucosylase/hydrolase with only only the endotransglucosylase (XET; EC 2.4.1.207) activity towards xyloglucan and non-detectable endohydrolytic (XEH; EC 3.2.1.151) activity. Expressed in the mature or basal regions of both the main and lateral roots, but not in the tip of these roots where cell division occurs.
AT5G60890	MYB34	2.9562	2.89718	2.88842	3.22853	0.0237944	0.0262875	0.0615673	0.0492379	836210	gene37023	NC_003076.8	24494291	24496371	2081	+	protein_coding	MYB34	Myb-like transcription factor that modulates expression of ASA1, a key point of control in the tryptophan pathway; mutant has deregulated expression of ASA1 in dominant allele. Loss of function allele suggests ATR1 also functions at a control point for regulating indole glucosinolate homeostasis.
AT1G58340	ZF14	11.0301	9.21966	7.65939	10.6395	0.0153223	0.0168657	0.0616739	0.0203468	842203	gene6836	NC_003070.9	21652988	21655439	2452	+	protein_coding	ZF14	Encodes a plant MATE (multidrug and toxic compound extrusion) transporter that is localized to the Golgi complex and small organelles and is involved in determining the rate of organ initiation. It is also involved in iron homeostasis when plants are under osmotic stress.
AT2G45570	CYP76C2	8.63024	7.42118	2.82472	2.39447	0.00773773	0.0398613	0.12881	0.0243682	819165	gene15675	NC_003071.7	18779321	18781973	2653	-	protein_coding	CYP76C2	member of CYP76C
AT1G07430	HAI2	8.61375	10.6791	8.28692	18.7231	0.0270552	0.0464732	0.239312	0.0417155	837255	gene853	NC_003070.9	2280746	2282828	2083	-	protein_coding	HAI2	Encodes a member of the group A protein phosphatase 2C (PP2C) family that is responsible for negatively regulating seed dormancy.
AT1G30250	F12P21.5	8.53701	5.93001	1.00218	1.0006	0.0221982	0.020325	0.734616	0.686581	839905	gene3761	NC_003070.9	10646842	10647650	809	-	protein_coding	F12P21.5	.
AT2G36630	F13K3.3	8.44792	5.24661	1.94229	2.83102	0.00773773	0.0191637	0.166376	0.0690264	818235	gene14482	NC_003071.7	15352491	15355330	2840	-	protein_coding	F13K3.3	.
AT2G46830	CCA1	8.4235	6.82098	2.11974	4.75771	0.0102072	0.0370107	0.289827	0.0780072	819296	gene15842	NC_003071.7	19245591	19248915	3325	+	protein_coding	CCA1	Encodes a transcriptional repressor that performs overlapping functions with LHY in a regulatory feedback loop that is closely associated with the circadian oscillator of Arabidopsis. Binds to the evening element in the promoter of TOC1 and represses TOC1 transcription. CCA1 and LHY colocalize in the nucleus and form heterodimers in vivo. CCA1 and LHY function synergistically in regulating circad…
AT1G64780	AMT1%3B2	1.00177	0.742122	0.316067	0.180264	1	0.0149118	0.0616879	0.0258073	842786	gene7607	NC_003070.9	24060640	24062804	2165	-	protein_coding	AMT1;2	encodes an ammonium transporter protein believed to act as a high affinity transporter. It is expressed in the root, primarily in endodermal and cortical cells, and contributes to ammonium uptake in the root.
AT5G01100	FRB1	8.35491	13.4496	1.79895	0.939556	0.0096896	0.012701	0.220569	0.316637	831831	gene29493	NC_003076.8	34538	37999	3462	-	protein_coding	FRB1	.
AT5G10410	F12B17.240	8.34804	8.11381	2.48336	2.55305	0.0104604	0.0137479	0.195362	0.0438819	830905	gene30634	NC_003076.8	3271767	3273429	1663	+	protein_coding	F12B17.240	.
AT3G01830	F28J7.16	8.33981	12.4173	1.78174	0.965947	0.0146209	0.0460489	0.143083	1	820033	gene16131	NC_003074.8	296024	299263	3240	+	protein_coding	F28J7.16	.
AT1G69870	NRT1.7	8.32533	7.61209	3.22761	4.64018	0.0179723	0.0143006	0.0530826	0.0645288	843323	gene8294	NC_003070.9	26315787	26320233	4447	+	protein_coding	NRT1.7	Encodes a low affinity nitrate transporter NRT1.7. Expressed in phloem. Responsible for source-to-sink remobilization of nitrate.
AT2G25460	F13B15.12	8.31923	7.60479	1.35704	0.952469	0.01327	0.0181428	0.129191	0.473292	817084	gene13042	NC_003071.7	10832578	10835660	3083	-	protein_coding	F13B15.12	.
AT4G26320	AGP13	0.223917	0.340482	0.134029	0.125522	0.093935	0.122896	0.0616879	0.0309014	828738	gene27686	NC_003075.7	13317053	13317640	588	-	protein_coding	AGP13	.
AT5G19110	T24G5.10	31.1194	21.3918	16.455	7.98295	0.00999249	0.0203663	0.0617951	0.0244981	832031	gene31688	NC_003076.8	6411443	6413311	1869	-	protein_coding	T24G5.10	.
AT5G10300	MES5	9.4533	10.2129	6.92804	10.6842	0.0107165	0.0121514	0.0617951	0.0278244	830894	gene30618	NC_003076.8	3239455	3240883	1429	+	protein_coding	MES5	Encodes a protein with R-selective hydroxynitrile lyase activity. It has similarity to the SABP2 methyl salicylate esterase from tobacco. This protein does not act on methyl IAA, methyl JA, MeSA, MeGA4, or MEGA9 in vitro.
AT5G06300	LOG7	4.21414	3.52676	2.98045	2.23352	0.0150623	0.0416865	0.0617951	0.0404869	830518	gene30164	NC_003076.8	1921548	1925407	3860	-	protein_coding	LOG7	.
AT1G60940	SNRK2.10	1.243	1.2082	2.54111	2.85627	0.0507049	0.120143	0.0617951	0.0238994	842385	gene7067	NC_003070.9	22439063	22442221	3159	-	protein_coding	SNRK2.10	encodes a member of SNF1-related protein kinases (SnRK2) whose activity is activated by ionic (salt) and non-ionic (mannitol) osmotic stress.
AT2G17660	AT2G17660	8.18772	9.77298	1.28095	0.440644	0.0337555	0.0419149	0.228023	0.0729564	816273	gene11977	NC_003071.7	7673145	7673712	568	+	protein_coding	.	.
AT5G24640	K18P6.18	8.17462	1.29208	4.17478	0.903111	0.031991	0.0521782	0.0670326	0.395639	832535	gene32313	NC_003076.8	8436352	8436895	544	+	protein_coding	K18P6.18	.
AT4G12400	Hop3	8.17252	2.8497	0.862853	2.09505	0.014101	0.02278	0.93968	0.055248	826849	gene25700	NC_003075.7	7338018	7341363	3346	-	protein_coding	Hop3	Encodes one of the 36 carboxylate clamp (CC)-tetratricopeptide repeat (TPR) proteins (Prasad 2010, Pubmed ID: 20856808) with potential to interact with Hsp90/Hsp70 as co-chaperones.
AT1G52855	AT1G52855	8.16376	11.5434	2.1766	2.07429	0.00968156	0.0421226	0.118799	0.459496	2745824	gene6112	NC_003070.9	19682773	19683565	793	-	protein_coding	.	.
AT5G07870	F13G24.70	1.16805	1.00638	2.41142	2.0174	0.14714	1	0.0617951	0.0818459	830680	gene30360	NC_003076.8	2513792	2515731	1940	+	protein_coding	F13G24.70	.
AT2G39400	F12L6.6	0.929738	1.71221	2.91197	3.63395	0.280095	0.0251945	0.0617951	0.0174508	818525	gene14829	NC_003071.7	16452612	16455001	2390	+	protein_coding	F12L6.6	.
AT5G16250	T21H19.170	0.426277	0.37331	0.407643	0.366412	0.0191586	0.023304	0.0617951	0.0417155	831485	gene31320	NC_003076.8	5310052	5310951	900	-	protein_coding	T21H19.170	.
AT1G24600	AT1G24600	8.09851	7.07843	1.8464	4.48257	0.0612896	0.06024	0.452925	0.0394756	839074	gene3097	NC_003070.9	8720309	8720721	413	+	protein_coding	.	.
AT4G20860	T13K14.20	8.09682	8.68502	1.96355	1.37196	0.00987685	0.021798	0.0685144	0.0519232	827834	gene26946	NC_003075.7	11172622	11174467	1846	+	protein_coding	T13K14.20	.
AT3G54040	AT3G54040	0.334726	0.461181	0.372625	0.203183	0.0143642	0.0372619	0.0617951	0.0271597	824571	gene22408	NC_003074.8	20013726	20015653	1928	-	protein_coding	.	.
AT5G15850	COL1	8.06711	5.25923	1.32298	1.52552	0.00890394	0.012701	0.456938	0.0822379	831442	gene31273	NC_003076.8	5176091	5177897	1807	-	protein_coding	COL1	Homologous to the flowering-time gene CONSTANS.
AT5G47450	TIP2%3B3	1.30052	1.72014	0.257547	0.705982	0.0714401	0.0332143	0.0618996	0.0770727	834794	gene35291	NC_003076.8	19248249	19249622	1374	-	protein_coding	TIP2;3	Tonoplast intrinsic protein, transports ammonium (NH3) and methylammonium across the tonoplast membrane, gene expression shows diurnal regulation and is upregulated by ammonium (NH3).
AT3G19615	AT3G19615	8.0457	4.86782	3.27647	4.5412	0.125088	0.118836	0.467769	0.315597	5008014	gene18467	NC_003074.8	6814966	6815403	438	-	protein_coding	.	.
AT5G00560	AT5G00560	8.04296	7.1384	2.29489	1.94497	0.0676542	0.0244347	0.141423	0.0957381	28720266	gene34149	NC_003076.8	15631830	15632522	693	+	misc_RNA	.	.
AT5G62340	MMI9.17	0.534462	0.835936	0.26426	0.316778	0.177581	0.558043	0.0618996	0.0461217	836355	gene37196	NC_003076.8	25033471	25034404	934	+	protein_coding	MMI9.17	.
AT1G61890	F8K4.9	16.6259	14.2161	2.27971	1.65698	0.0116702	0.012701	0.0622587	0.0413127	842485	gene7206	NC_003070.9	22867689	22871358	3670	-	protein_coding	F8K4.9	.
AT4G36950	MAPKKK21	7.26941	6.40345	11.6916	7.24473	0.0218687	0.0206934	0.0622826	0.128254	3770588	gene29066	NC_003075.7	17422538	17423953	1416	-	protein_coding	MAPKKK21	member of MEKK subfamily
AT3G06490	MYB108	5.27039	4.34993	7.8807	6.03201	0.0482749	0.020033	0.0422826	0.0446658	819827	gene16757	NC_003074.8	2003393	2006727	3335	+	protein_coding	MYB108	putative transcription factor MYB108 (MYB108) mRNA
AT1G10170	NFXL1	3.01871	1.71477	2.53321	3.73642	0.0114775	0.033035	0.0622826	0.0149446	837555	gene1209	NC_003070.9	3333504	3338188	4685	-	protein_coding	NFXL1	Encodes AtNFXL1, a homologue of the putative human transcription repressor NF-X1. Functions as a negative regulator of the trichothecene phytotoxin-induced defense response.
AT3G15356	AT3G15356	1.84027	4.15983	3.04277	2.76062	0.0104467	0.0194405	0.0622826	0.0975459	820768	gene17880	NC_003074.8	5174402	5175523	1122	-	protein_coding	.	.
AT3G23570	AT3G23570	1.49641	1.80173	2.04521	2.07166	0.0239425	0.0243009	0.0622826	0.0320104	821936	gene19017	NC_003074.8	8457767	8459990	2224	-	protein_coding	.	.
AT4G20830	F21C20.180	7.51445	7.50974	2.19688	1.58995	0.00996556	0.0352002	0.0623576	0.0731941	827831	gene26942	NC_003075.7	11155453	11157806	2354	+	protein_coding	F21C20.180	.
AT3G50260	CEJ1	7.75696	7.40435	1.15511	0.849782	0.0123761	0.0563863	0.943928	0.300301	824188	gene21918	NC_003074.8	18634546	18635514	969	+	protein_coding	CEJ1	Encodes a member of the DREB subfamily A-5 of ERF/AP2 transcription factor family. The protein contains one AP2 domain. Involved in defense and freezing stress responses. There are 16 members in this subfamily including RAP2.1, RAP2.9 and RAP2.10.
AT1G70130	F20P5.15	3.28812	2.25214	11.1157	3.78278	0.0203477	0.0186312	0.0623576	0.0500871	843349	gene8324	NC_003070.9	26409601	26411828	2228	-	protein_coding	F20P5.15	.
AT2G24500	FZF	1.6952	1.55494	2.49431	2.60773	0.0295892	0.0243987	0.0623576	0.0365309	816986	gene12887	NC_003071.7	10400630	10402934	2305	-	protein_coding	FZF	Encodes a C2H2 zinc finger protein FZF.
AT4G23215	AT4G23215	7.70326	12.52	2.43183	1.1261	0.0209455	0.0375829	0.387747	0.0244981	6241102	gene27270	NC_003075.7	12152900	12153459	560	-	transcribed_pseudogene	.	pseudogene of cysteine-rich receptor-like protein kinase family protein
AT1G07900	LBD1	7.69477	11.1741	0.753799	0.862891	0.0317578	0.0470766	0.0951691	0.0385574	837305	gene922	NC_003070.9	2442570	2443746	1177	+	protein_coding	LBD1	.
AT4G15150	DL3620C	7.65608	8.19202	1.83452	1.34261	0.0229629	0.0183996	0.177599	0.210688	827181	gene26143	NC_003075.7	8641499	8642278	780	-	protein_coding	DL3620C	.
AT2G20560	T13C7.15	7.63412	4.00595	0.695924	1.67766	0.0128095	0.0380301	0.0916138	0.0212761	816578	gene12337	NC_003071.7	8848130	8850111	1982	-	protein_coding	T13C7.15	.
AT1G80830	NRAMP1	0.717846	0.709507	0.305414	0.315945	0.0137186	0.0335905	0.0623576	0.0298352	844422	gene9678	NC_003070.9	30372668	30376072	3405	-	protein_coding	NRAMP1	Thought to be involved in iron homeostasis. Induced in leaves in response to iron deficiency. Transgenic plants accumulate toxic levels of iron. Gene complements yeast iron uptake mutants.
AT3G43800	GSTU27	0.369176	0.365437	0.332569	0.378908	0.0146622	0.013153	0.0623576	0.0349637	823491	gene20967	NC_003074.8	15660770	15661987	1218	+	protein_coding	GSTU27	Encodes glutathione transferase belonging to the tau class of GSTs. Naming convention according to Wagner et al. (2002).
AT3G02040	SRG3	0.189107	0.26897	0.458242	0.599181	0.0083949	0.0198275	0.0623576	0.0415343	821175	gene16155	NC_003074.8	348167	350010	1844	-	protein_coding	SRG3	Encodes a member of the glycerophosphodiester phosphodiesterase (GDPD) family. Has glycerophosphodiester phosphodiesterase activity. Functions in maintaining cellular phosphate homeostasis under phosphate starvation.
AT3G62040	AT3G62040	0.702574	0.634834	0.432085	0.392217	0.0525031	0.0440872	0.0624675	0.0561027	825377	gene23444	NC_003074.8	22975328	22976603	1276	-	protein_coding	.	.
AT3G05640	F18C1.9	7.49449	9.76658	1.88491	2.9654	0.0172734	0.0123069	0.241343	0.0940484	819731	gene16624	NC_003074.8	1640350	1643253	2904	-	protein_coding	F18C1.9	.
AT5G21280	AT5G21280	4.14587	2.86691	3.0355	3.16565	0.0124442	0.0189769	0.0626766	0.0379242	832258	gene31968	NC_003076.8	7263828	7265874	2047	-	protein_coding	.	.
AT1G63030	ddf2	7.46934	6.35971	0.824923	0.354701	0.0982133	0.0504028	0.815602	0.0917653	842606	gene7373	NC_003070.9	23367394	23368416	1023	-	protein_coding	ddf2	encodes a member of the DREB subfamily A-1 of ERF/AP2 transcription factor family (DDF2). The protein contains one AP2 domain. There are six members in this subfamily, including CBF1, CBF2, and CBF3. Overexpression of this gene results in the reduction of gibberellic acid biosynthesis. This gene is expressed in all tissues examined, but most abundantly expressed in rosette leaves and stems. Overe…
AT1G51420	SPP1	1.99692	1.81125	2.4042	1.83148	0.0534261	0.0775974	0.0627698	0.0268778	841567	gene5922	NC_003070.9	19064598	19066989	2392	-	protein_coding	SPP1	.
AT5G62470	MYB96	7.37385	8.22451	2.5531	2.98845	0.00773773	0.0168402	0.104538	0.129288	836367	gene37212	NC_003076.8	25078991	25081141	2151	-	protein_coding	MYB96	Encodes a R2R3 type Myb transcription factor whose expression is strongly induced by abscisic acid. Mediates abscisic acid signaling during drought stress response.
AT5G36925	AT5G36925	7.36584	10.3507	6.16274	2.88905	0.0112683	0.0137479	0.108108	0.145429	833661	gene33828	NC_003076.8	14565476	14566439	964	-	protein_coding	.	.
AT2G24600	F25P17.10	7.31194	12.9055	1.11558	0.488466	0.0178494	0.0207188	0.829959	0.0259183	816996	gene12907	NC_003071.7	10452034	10454593	2560	-	protein_coding	F25P17.10	.
AT4G26010	F20B18.120	0.280979	0.544203	0.465847	0.252412	0.0141589	0.0383221	0.0629287	0.0233633	828707	gene27646	NC_003075.7	13200414	13202164	1751	+	protein_coding	F20B18.120	.
AT5G13220	JAZ10	12.2173	13.332	6.52086	3.55706	0.018304	0.0198275	0.0633999	0.0419755	831162	gene30935	NC_003076.8	4218786	4221077	2292	+	protein_coding	JAZ10	Plants overexpressing At5g13220.3, but not At5g13220.1 showed enhanced insensitivity to MeJa.
AT2G04780	FLA7	0.369747	0.405938	0.464026	0.40684	0.0256103	0.0244008	0.0633999	0.045748	815021	gene10247	NC_003071.7	1676717	1678455	1739	+	protein_coding	FLA7	fasciclin-like arabinogalactan-protein 7 (Fla7)
AT1G08200	AXS2	1.67407	1.55717	2.50424	2.51192	0.0205079	0.028621	0.063435	0.0310399	837341	gene965	NC_003070.9	2573818	2576844	3027	-	protein_coding	AXS2	Encodes a putative UDP-D-apiose/UPD-D-xylose synthetase.
AT2G39518	CASP-like protein 4D2	7.1029	4.71569	1.88768	1.25744	0.0226595	0.0245747	0.130013	0.175055	5007945	gene14847	NC_003071.7	16495819	16497145	1327	-	protein_coding	CASP-like protein 4D2	.
AT5G01210	F7J8.190	0.428141	0.599248	0.293356	0.450391	0.0183551	0.0248774	0.0637842	0.039584	831901	gene29509	NC_003076.8	84474	86275	1802	+	protein_coding	F7J8.190	.
AT1G65390	PP2-A5	7.09807	8.93711	5.61457	2.02417	0.0133298	0.0137479	0.0764373	0.0620612	842851	gene7683	NC_003070.9	24292372	24294740	2369	+	protein_coding	PP2-A5	.
AT5G04960	MUG13.18	0.189445	0.311426	0.243532	0.13866	0.0420626	0.0523839	0.064033	0.0286839	830378	gene29992	NC_003076.8	1461786	1464066	2281	+	protein_coding	MUG13.18	.
AT4G37410	CYP81F4	2.71551	1.95503	2.07498	2.1919	0.0107295	0.0215635	0.0641286	0.0366825	829895	gene29121	NC_003075.7	17590772	17592920	2149	+	protein_coding	CYP81F4	member of CYP81F
AT3G23510	AT3G23500	1.17843	1.09838	0.406461	0.473182	0.170123	0.413322	0.0643989	0.0307515	821931	gene19010	NC_003074.8	8427557	8433340	5784	+	protein_coding	AT3G23500	.
AT3G15534	AT3G15534	7.02239	5.14716	2.13679	2.37028	0.0440018	0.0673758	0.385841	0.529845	28719274	gene17912	NC_003074.8	5258715	5259354	640	+	protein_coding	.	.
AT4G06415	AT4G06415	7.01913	4.07669	2.21606	2.85015	0.0441364	0.0297336	0.262005	0.04701	28719788	gene26373	NC_003075.7	9390464	9390930	467	+	lncRNA	.	Natural antisense transcript overlaps with AT4G16680
AT1G07500	F22G5.11	7.00653	5.26739	0.596689	0.941791	0.0310465	0.179049	0.734616	1	837264	gene867	NC_003070.9	2304766	2305031	266	-	protein_coding	F22G5.11	.
AT4G15210	BAM5	6.9966	16.0886	1.30791	1.35899	0.0144655	0.0137479	0.100596	0.117875	827185	gene26148	NC_003075.7	8666334	8669526	3193	-	protein_coding	BAM5	cytosolic beta-amylase expressed in rosette leaves and inducible by sugar. RAM1 mutants have reduced beta amylase in leaves and stems.
AT5G43620	K9D7.12	6.97217	5.77572	0.821967	0.596268	0.0126216	0.0194405	0.148884	0.0255367	834382	gene34775	NC_003076.8	17522486	17524003	1518	+	protein_coding	K9D7.12	.
AT4G16690	MES16	6.9592	3.52188	1.00903	1.28672	0.018304	0.0209688	1	0.0770727	827371	gene26374	NC_003075.7	9391964	9393650	1687	-	protein_coding	MES16	Encodes a protein shown to have carboxylesterase activity, methyl IAA esterase activity, and methyl jasmonate esterase activity in vitro. This protein does not act on MeSA, MeGA4, or MEGA9 in vitro. Although MES16 is similar to MES17, a MeIAA hydrolase, two mes16 mutant lines (SALK_151578) and (SALK_139756) do not show altered sensitivity to MeIAA in root growth assays. MES16 transcripts appear t…
AT2G33690	T1B8.27	6.95637	4.1212	3.18286	2.02499	0.0363952	0.0404278	0.452861	0.0884957	817934	gene14080	NC_003071.7	14252154	14252643	490	+	protein_coding	T1B8.27	.
AT5G08790	ATAF2	8.87229	5.56106	3.00132	2.10652	0.014208	0.0165157	0.064654	0.0222995	830779	gene30480	NC_003076.8	2858849	2860558	1710	-	protein_coding	ATAF2	induced by wounding, belongs to a large family of putative transcriptional activators with NAC domain.
AT4G24380	T22A6.210	6.91864	5.53343	1.90227	1.16764	0.00996556	0.0242116	0.424665	0.124023	828540	gene27439	NC_003075.7	12612378	12613719	1342	+	protein_coding	T22A6.210	.
AT5G52020	MSG15.10	6.91309	8.71243	0.867395	0.378738	0.071319	0.0137674	0.734616	0.0244143	835277	gene35888	NC_003076.8	21123958	21125065	1108	-	protein_coding	MSG15.10	encodes a member of the DREB subfamily A-4 of ERF/AP2 transcription factor family. The protein contains one AP2 domain. There are 17 members in this subfamily including TINY.
AT4G22212	AT4G22212	4.11996	4.1244	3.86316	2.80936	0.0313339	0.0462665	0.0649127	0.0709138	828313	gene27134	NC_003075.7	11753842	11754752	911	+	protein_coding	.	Encodes a defensin-like (DEFL) family protein.
AT3G57760	AT3G57760	6.86918	4.34499	3.34317	2.34439	0.0348843	0.0223701	0.144232	0.0366825	824945	gene22886	NC_003074.8	21395297	21397244	1948	+	protein_coding	.	.
AT5G62520	SRO5	6.86314	8.03123	1.08299	0.777672	0.0366341	0.0156208	0.734616	0.0948054	836372	gene37218	NC_003076.8	25097944	25099907	1964	+	protein_coding	SRO5	Encodes a protein with similarity to RCD1 but without the WWE domain. The protein does have a PARP signature upstream of the C-terminal protein interaction domain. The PARP signature may bind NAD+ and attach the ADP-ribose-moiety from NAD+ to the target molecule. Its presence suggests a role for the protein in ADP ribosylation. Up-regulated by NaCl. SRO5 and P5CDH (an overlapping gene in the anti…
AT1G47510	5PTASE11	6.86184	7.29563	4.08729	5.75897	0.00385398	0.0137674	0.231075	0.121295	841160	gene5397	NC_003070.9	17435525	17438490	2966	-	protein_coding	5PTASE11	Encodes a phosphatidylinositol polyphosphate 5-phosphatase. It can dephosphorylate PI(4,5)P2, PI(3,5)P2, and PI(3,4,5)P3, but, it is not active against PI(5)P or the water soluble inositol(1,4,5)P3 or inositol(1,3,4,5)P4. The transcript levels for this gene rise in response to auxin, ABA, and JA.
AT5G67310	CYP81G1	6.84779	6.60891	1.6059	0.88775	0.02245	0.0137479	0.165823	0.0677573	836866	gene37850	NC_003076.8	26855216	26857086	1871	-	protein_coding	CYP81G1	member of CYP81G
AT1G54570	PES1	1.58731	1.79021	2.18836	2.27846	0.111267	0.033562	0.0653872	0.0518875	841899	gene6350	NC_003070.9	20380435	20385380	4946	-	protein_coding	PES1	Encodes a protein with phytyl ester synthesis and diacylglycerol acyltransferase activities that is involved in the deposition of free phytol and free fatty acids in the form of phytyl esters in chloroplasts, a process involved in maintaining the integrity of the photosynthetic membrane during abiotic stress and senescence.
AT4G28140	F26K10.20	6.82914	13.299	3.45095	5.88544	0.0179567	0.0254183	0.0605165	0.0724829	828929	gene27932	NC_003075.7	13974493	13975919	1427	-	protein_coding	F26K10.20	encodes a member of the DREB subfamily A-6 of ERF/AP2 transcription factor family. The protein contains one AP2 domain. There are 8 members in this subfamily including RAP2.4.
AT5G14180	MPL1	6.82308	11.2177	2.16911	3.52508	0.0535082	0.0454088	0.0948187	0.0526351	831268	gene31052	NC_003076.8	4571294	4574679	3386	-	protein_coding	MPL1	.
AT5G17860	CAX7	6.82086	6.69849	1.96879	2.7201	0.0128095	0.0217654	0.231861	0.111227	831654	gene31520	NC_003076.8	5902394	5904532	2139	-	protein_coding	CAX7	.
AT2G22860	PSK2	6.81019	7.76558	1.61984	1.27238	0.0259568	0.0275249	0.516501	0.0674584	816817	gene12665	NC_003071.7	9737583	9738384	802	+	protein_coding	PSK2	Phytosulfokine 2 precursor, coding for a unique plant peptide growth factor.
AT4G20835	AT4G20835	6.80883	7.05953	1.8882	1.51271	0.0106072	0.0247226	0.299939	0.103213	28720160	gene26943	NC_003075.7	11155537	11157106	1570	-	protein_coding	.	.
AT1G02810	F22D16.20	0.326298	0.656287	0.190624	0.161363	0.0435796	0.123109	0.0653872	0.0205715	838078	gene236	NC_003070.9	618061	620502	2442	+	protein_coding	F22D16.20	.
AT3G22830	HSFA6B	11.0226	8.97958	14.3509	12.6069	0.0104467	0.0313782	0.0655885	0.0338773	821854	gene18909	NC_003074.8	8078789	8081059	2271	+	protein_coding	HSFA6B	member of Heat Stress Transcription Factor (Hsf) family
AT2G39030	NATA1	6.77667	25.0145	2.11383	2.19023	0.036634	0.0209151	0.23777	0.0235136	818489	gene14782	NC_003071.7	16298110	16299205	1096	+	protein_coding	NATA1	Encodes a protein that acts as an ornithine N-delta-acetyltransferase, leading to the formation of N-delta-actetylornithine. This compound is likely used in plant defense and levels of it are increased in Arabidopsis plants in response to MeJA and ABA.
AT5G41900	K16L22.19	6.75318	8.21658	1.1689	1.12277	0.0181499	0.0198275	0.442909	0.307726	834195	gene34529	NC_003076.8	16768935	16771899	2965	+	protein_coding	K16L22.19	.
AT5G23820	MD2-related lipid recognition 3	1.3625	1.19812	3.74043	3.75518	0.0431251	0.155698	0.0657176	0.0184657	832447	gene32202	NC_003076.8	8031165	8033149	1985	+	protein_coding	MD2-related lipid recognition 3	.
AT5G10580	F12B17.70	0.631447	0.589481	0.408456	0.246728	0.0204404	0.0696141	0.0657176	0.0314708	830923	gene30660	NC_003076.8	3347381	3350071	2691	+	protein_coding	F12B17.70	.
AT2G16367	AT2G16367	6.69686	7.41494	1.52746	1.41383	0.055995	0.0225071	0.0533317	0.157845	28718279	gene11797	NC_003071.7	7079650	7080075	426	-	transcribed_pseudogene	.	Encodes a defensin-like (DEFL) family protein.
AT3G01190	T4P13.12	0.558099	0.572416	0.315745	0.413004	0.0379956	0.0335253	0.0658271	0.0339557	821314	gene16037	NC_003074.8	67032	68665	1634	-	protein_coding	T4P13.12	.
AT4G15480	UGT84A1	6.68281	5.86068	2.14955	0.926903	0.0096896	0.0251084	0.411468	0.341926	827220	gene26196	NC_003075.7	8848801	8850516	1716	-	protein_coding	UGT84A1	Encodes a protein that might have sinapic acid:UDP-glucose glucosyltransferase activity.
AT1G76700	F28O16.7	2.41856	2.86854	2.88898	1.66051	0.0330339	0.0228435	0.0659484	0.0336269	844003	gene9138	NC_003070.9	28780408	28783257	2850	-	protein_coding	F28O16.7	.
AT3G16460	JAL34	1.62238	1.50418	2.11573	1.85774	0.0182021	0.0298036	0.0659484	0.0659365	820894	gene18035	NC_003074.8	5592491	5595912	3422	+	protein_coding	JAL34	.
AT1G05353	AT1G05353	6.65751	3.82028	0.541792	0.80502	0.329998	0.413838	0.708408	0.828792	28716297	gene2224	NC_003070.9	6151974	6152170	197	+	antisense_RNA	.	Natural antisense transcript overlaps with AT1G17870
AT2G24540	AFR	6.64963	6.54056	0.650885	0.799962	0.0245452	0.0121514	0.258223	0.102545	816990	gene12899	NC_003071.7	10426342	10427683	1342	+	protein_coding	AFR	.
AT1G56580	SVB	2.89798	3.13111	3.52232	5.10735	0.0300255	0.0402474	0.0659753	0.0340081	842112	gene6629	NC_003070.9	21198004	21199126	1123	-	protein_coding	SVB	Encodes SMALLER WITH VARIABLE BRANCHES (SVB), a protein with a conserved domain of unknown function (DUF538). The trichomes of the SVB mutants are smaller and exhibit branches of variable length and number.
AT1G71520	F26A9.11	17.818	11.0307	9.45092	8.50601	0.0315926	0.0573884	0.0660732	0.0330001	843492	gene8502	NC_003070.9	26938369	26939267	899	+	protein_coding	F26A9.11	encodes a member of the DREB subfamily A-5 of ERF/AP2 transcription factor family. The protein contains one AP2 domain. There are 16 members in this subfamily including RAP2.1, RAP2.9 and RAP2.10.
AT1G02930	GSTF6	12.9101	24.4696	3.75208	2.79449	0.01107	0.0122452	0.0660732	0.0778762	839515	gene253	NC_003070.9	661088	662475	1388	-	protein_coding	GSTF6	Encodes glutathione transferase belonging to the phi class of GSTs. Naming convention according to Wagner et al. (2002).
AT3G59220	PRN	11.1619	7.57053	9.412	5.50952	0.0108125	0.0130036	0.0660732	0.0252206	825091	gene23065	NC_003074.8	21893812	21895789	1978	+	protein_coding	PRN	encodes a cupin-domain containing protein that is similar to pirins which interact with a CCAAT box binding transcription factor. The protein interacts with GPA1 (G protein alpha-subunit) in vitro. Mutants in the gene are affected in germination and early seedling development.
AT2G29500	F16P2.12	6.60337	2.21371	1.05721	2.51673	0.0113505	0.0141211	0.834525	0.105956	817499	gene13541	NC_003071.7	12633065	12634120	1056	-	protein_coding	F16P2.12	.
AT2G16900	F12A24.8	3.79008	3.00225	2.94656	1.8691	0.0169808	0.0254681	0.0660732	0.0659365	816192	gene11874	NC_003071.7	7323570	7326317	2748	-	protein_coding	F12A24.8	.
AT1G21980	PIP5K1	2.0458	2.17913	2.78941	2.97586	0.014101	0.0305981	0.0660732	0.0233633	838801	gene2765	NC_003070.9	7734661	7738772	4112	+	protein_coding	PIP5K1	Type I phosphatidylinositol-4-phosphate 5-kinase. Preferentially phosphorylates PtdIns4P. Induced by water stress and abscisic acid in Arabidopsis thaliana. Expressed in procambial cells of leaves, flowers and roots. A N-terminal Membrane Occupation and Recognition Nexus (MORN)affects enzyme activity and distribution.
AT3G27250	AT3G27250	6.56679	7.36783	1.68385	4.41628	0.012371	0.0183343	0.150055	0.0379242	822344	gene19544	NC_003074.8	10061009	10062870	1862	+	protein_coding	.	.
AT1G68290	ENDO2	6.55594	5.7665	8.67575	6.09042	0.031328	0.0194405	0.0667448	0.0518294	843158	gene8067	NC_003070.9	25596671	25598438	1768	+	protein_coding	ENDO2	Encodes an endonuclease ENDO2. ENDO2 purified from transgenic Arabidopsis digests RNA, ssDNA, and dsDNA, with a substrate preference for ssDNA and RNA. ENDO2 produced and purified from Nicotiana benthamiana expression showed no demonstrable endonuclease activity, either towards single stranded DNA or mismatches, in vitro.
AT1G27950	LTPG1	1.53461	1.59257	2.26724	1.46749	0.0668438	0.0668045	0.0660732	0.227458	839688	gene3448	NC_003070.9	9740508	9742159	1652	+	protein_coding	LTPG1	Encodes LTPG1, a lipid transfer protein with a predicted GPI (glycosylphosphatidylinositol)-anchor domain. Localized in the plasma membrane. Disruption of the LTPG1 gene causes alterations of cuticular lipid composition, but no significant changes on total wax and cutin monomer loads are seen.
AT3G21260	GLTP3	0.759221	0.793849	0.390259	0.394736	0.160251	0.565107	0.0660732	0.0347538	821680	gene18680	NC_003074.8	7463834	7465975	2142	-	protein_coding	GLTP3	.
AT4G22470	F7K2.50	6.50443	5.23458	4.06423	3.37923	0.00987685	0.0137479	0.0840291	0.0987213	828342	gene27176	NC_003075.7	11840134	11841450	1317	-	protein_coding	F7K2.50	.
AT2G39040	T7F6.21	0.526996	0.602208	0.245808	0.348277	0.0722996	0.0938795	0.0660732	0.0329587	818490	gene14783	NC_003071.7	16299242	16301245	2004	-	protein_coding	T7F6.21	.
AT4G30460	F17I23.200	6.49816	6.0289	1.24517	1.81308	0.0253925	0.0430636	0.400493	0.188217	829169	gene28223	NC_003075.7	14888931	14889855	925	-	protein_coding	F17I23.200	.
AT3G04620	DAN1	6.44241	10.9013	1.8926	2.01737	0.0257574	0.0314047	0.376842	0.0638984	819620	gene16484	NC_003074.8	1255398	1257017	1620	-	protein_coding	DAN1	Target promoter of the male germline-specific transcription factor DUO1.
AT5G24110	WRKY30	6.4398	20.6989	3.50144	2.42314	0.0158481	0.041716	0.120984	0.0738206	832476	gene32237	NC_003076.8	8153115	8154710	1596	-	protein_coding	WRKY30	member of WRKY Transcription Factor; Group III
AT4G38401	AT4G38401	6.40804	0.998512	1.00112	1.00031	0.658936	0.453877	0.734616	0.686581	6240324	gene29253	NC_003075.7	17979763	17979885	123	-	protein_coding	.	.
AT3G49620	DIN11	3.42382	21.6144	15.3429	6.27351	0.0286809	0.0175855	0.0662639	0.0545792	824124	gene21838	NC_003074.8	18393747	18397050	3304	+	protein_coding	DIN11	encodes a protein similar to 2-oxoacid-dependent dioxygenase. Expression is induced after 24 hours of dark treatment, in senescing leaves and treatment with exogenous photosynthesis inhibitor. Induction of gene expression was suppressed in excised leaves supplied with sugar. The authors suggest that the gene's expression pattern is responding to the level of sugar in the cell.
AT2G29490	GSTU1	4.83049	3.36243	2.11387	2.06075	0.0331829	0.0211476	0.066326	0.0400209	817498	gene13540	NC_003071.7	12631341	12632538	1198	-	protein_coding	GSTU1	Encodes glutathione transferase belonging to the tau class of GSTs. Naming convention according to Wagner et al. (2002).
AT5G48570	ATFKBP65	8.03048	1.65582	0.409256	1.62226	0.0171746	0.115883	0.0667448	0.0489202	834913	gene35431	NC_003076.8	19690461	19693845	3385	-	protein_coding	ATFKBP65	Encodes one of the 36 carboxylate clamp (CC)-tetratricopeptide repeat (TPR) proteins (Prasad 2010, Pubmed ID: 20856808) with potential to interact with Hsp90/Hsp70 as co-chaperones.
AT2G06050	OPR3	5.92714	8.62596	2.60834	1.45546	0.014208	0.0137674	0.0667448	0.0901531	815160	gene10440	NC_003071.7	2359114	2362375	3262	-	protein_coding	OPR3	Encodes a 12-oxophytodienoate reductase that is required for jasmonate biosynthesis. Mutants are male sterile and defective in pollen dehiscence. Shows activity towards 2,4,6-trinitrotoluene.
AT4G39670	T19P19.60	6.3375	4.91572	1.95639	1.70024	0.0125218	0.03193	0.0756866	0.0565387	830121	gene29407	NC_003075.7	18409846	18411069	1224	+	protein_coding	T19P19.60	.
AT5G57510	MUA2.8	6.32656	2.82026	0.954909	0.916516	0.0131198	0.044771	1	0.484153	835855	gene36592	NC_003076.8	23288885	23289635	751	-	protein_coding	MUA2.8	.
AT1G29195	AT1G29195	6.27174	3.04623	1.90561	2.88202	0.0181704	0.0422734	0.119461	0.0362325	839794	gene3622	NC_003070.9	10202414	10203491	1078	-	protein_coding	.	.
AT1G28370	ERF11	3.33101	6.00347	0.451967	0.356382	0.0274637	0.0279428	0.0667448	0.0222995	839733	gene3509	NC_003070.9	9955774	9956980	1207	-	protein_coding	ERF11	encodes a member of the ERF (ethylene response factor) subfamily B-1 of ERF/AP2 transcription factor family. The protein contains one AP2 domain. There are 15 members in this subfamily including ATERF-3, ATERF-4, ATERF-7, and leafy petiole.
AT5G16960	F2K13.110	6.26175	2.04189	1.49789	1.39542	0.0187396	0.316781	0.0893093	0.0541087	831559	gene31406	NC_003076.8	5573700	5575910	2211	-	protein_coding	F2K13.110	.
AT3G09350	Fes1A	6.24808	3.18494	0.980202	2.47394	0.0261903	0.0397717	0.753604	0.0419755	820091	gene17066	NC_003074.8	2870970	2873332	2363	+	protein_coding	Fes1A	Encodes one of the Arabidopsis orthologs of the human Hsp70-binding protein 1 (HspBP-1) and yeast Fes1p: Fes1A (AT3G09350), Fes1B (AT3G53800), Fes1C (AT5G02150). Fes1A is cytosolic and associates with cytosolic Hsp70. Mutants showed increased heat-sensitive phenotype suggestion the involvement of Fes1A in acquired thermotolerance. Does not have nucleotide exchange factor activity in vitro.
AT3G11410	PP2CA	6.24449	7.07292	1.55672	2.43241	0.00999249	0.012217	0.284853	0.0730115	820314	gene17325	NC_003074.8	3583782	3585850	2069	-	protein_coding	PP2CA	Encodes protein phosphatase 2C. Negative regulator of ABA signalling. Expressed in seeds during germination. mRNA up-regulated by drought and ABA.
AT1G74950	TIFY10B	6.22863	6.97684	1.96865	1.30694	0.0182965	0.0207844	0.13992	0.214998	843834	gene8923	NC_003070.9	28148574	28150446	1873	-	protein_coding	TIFY10B	.
AT2G41100	TCH3	6.20613	8.00312	0.876499	0.483264	0.0112683	0.0155084	0.776116	0.022353	818709	gene15070	NC_003071.7	17137037	17139700	2664	+	protein_coding	TCH3	encodes a calmodulin-like protein, with six potential calcium binding domains. Calcium binding shown by Ca(2+)-specific shift in electrophoretic mobility. Expression induced by touch and darkness. Expression may also be developmentally controlled. Expression in growing regions of roots, vascular tissue, root/shoot junctions, trichomes, branch points of the shoot, and regions of siliques and flowe…
AT1G72520	LOX4	6.17611	15.7276	1.67916	1.02135	0.0201768	0.020138	0.159502	0.686581	843584	gene8612	NC_003070.9	27308513	27312756	4244	+	protein_coding	LOX4	.
AT1G36622	AT1G36622	6.15683	5.87867	1.42026	0.752976	0.0172494	0.0216611	0.184112	0.164862	5007772	gene4675	NC_003070.9	13835620	13836954	1335	-	protein_coding	.	.
AT5G05965	AT5G05965	6.14506	5.9543	4.40135	7.48819	0.03394	0.0536449	0.266003	0.0671775	830482	gene30114	NC_003076.8	1790788	1792634	1847	-	protein_coding	.	.
AT2G34810	F19I3.4	6.11389	6.7122	7.70258	8.7005	0.0174541	0.0179499	0.199311	0.0854841	818046	gene14235	NC_003071.7	14685170	14687216	2047	+	protein_coding	F19I3.4	.
AT4G29780	F27B13.20	6.10964	5.02255	1.1551	0.738591	0.0127331	0.0155084	0.633955	0.0607058	829100	gene28142	NC_003075.7	14579563	14582057	2495	+	protein_coding	F27B13.20	.
AT3G30210	MYB121	6.09515	5.23056	5.76193	10.9914	0.00999249	0.013153	0.0892739	0.0360175	822714	gene20050	NC_003074.8	11838363	11840502	2140	+	protein_coding	MYB121	Encodes a putative transcription factor, member of the R2R3 factor gene family (MYB121).
AT1G76070	T23E18.1	6.07812	5.20707	1.77396	1.59862	0.022018	0.020637	0.151987	0.153426	843939	gene9064	NC_003070.9	28546382	28547611	1230	+	protein_coding	T23E18.1	.
AT5G59590	UGT76E2	6.0676	5.14342	2.84807	2.18547	0.0201199	0.0522955	0.149958	0.0281236	836078	gene36862	NC_003076.8	24008865	24010688	1824	-	protein_coding	UGT76E2	.
AT5G43840	HSFA6A	6.06504	6.61754	1.07553	3.41054	0.0230655	0.0154361	0.967423	0.0525633	834406	gene34804	NC_003076.8	17625353	17626487	1135	-	protein_coding	HSFA6A	member of Heat Stress Transcription Factor (Hsf) family
AT2G16700	ADF5	1.95604	1.67518	2.3455	2.25727	0.0331651	0.0374782	0.0667448	0.0226321	816171	gene11847	NC_003071.7	7244500	7246069	1570	+	protein_coding	ADF5	Encodes actin depolymerizing factor 5 (ADF5).
AT1G24580	AT1G24580	6.0608	8.72135	1.56714	2.53217	0.0112683	0.0344937	0.490177	0.0707071	2745762	gene3093	NC_003070.9	8709941	8710824	884	+	protein_coding	.	.
AT1G11210	AT1G11210	1.81649	3.51389	2.08383	1.76998	0.0426457	0.0329153	0.0667448	0.0376861	837662	gene1348	NC_003070.9	3755668	3756998	1331	-	protein_coding	.	.
AT5G06860	PGIP1	6.02482	6.54432	1.96492	2.0001	0.00996556	0.0137479	0.199841	0.0766903	830577	gene30230	NC_003076.8	2132350	2133587	1238	+	protein_coding	PGIP1	Encodes a polygalacturonase inhibiting protein involved in defense response. PGIPs inhibit the function of cell wall pectin degrading enzymes such as those produced by fungal pathogens. PGIP1 is induced by fungal infection. Suppressed in the proton sensitive stop1-mutant, but the transcription level was recovered by transformation of STOP2. Knockout mutant showed severe damage in the root tip in …
AT5G52570	BETA-OHASE 2	6.01739	4.54407	3.30819	4.41112	0.0116702	0.0206934	0.15677	0.0308966	835334	gene35963	NC_003076.8	21334793	21337126	2334	-	protein_coding	BETA-OHASE 2	Converts beta-carotene to zeaxanthin via cryptoxanthin.
AT1G11310	MLO2	0.78879	1.02946	0.459245	0.451783	0.0227969	0.254679	0.0667448	0.0338773	837673	gene1360	NC_003070.9	3800500	3804233	3734	-	protein_coding	MLO2	A member of a large family of seven-transmembrane domain proteins specific to plants, homologs of the barley mildew resistance locus o (MLO) protein. The Arabidopsis genome contains 15 genes encoding MLO proteins, with localization in plasma membrane. Phylogenetic analysis revealed four clades of closely-related AtMLO genes. ATMLO2 belongs to the clade IV, with AtMLO3, AtMLO6 and AtMLO12. The gen…
AT5G01410	RSR4	0.750182	0.841767	2.14751	2.34103	0.0561071	0.0838999	0.0667448	0.143179	831738	gene29538	NC_003076.8	171889	173663	1775	-	protein_coding	RSR4	Encodes a protein predicted to function in tandem with PDX2 to form glutamine amidotransferase complex with involved in vitamin B6 biosynthesis.
AT1G32640	MYC2	5.99702	6.10886	1.69707	1.35713	0.010934	0.0137479	0.122831	0.0645039	840158	gene4111	NC_003070.9	11798119	11801407	3289	-	protein_coding	MYC2	Encodes a MYC-related transcriptional activator with a typical DNA binding domain of a basic helix-loop-helix leucine zipper motif. Binds to an extended G-Box promoter motif and interacts with Jasmonate ZIM-domain proteins. Its transcription is induced by dehydration stress and ABA treatment. Negative regulator of blue light#Aeimediated photomorphogenic growth and blue and far-red-light#Aeiregula…
AT3G23230	TDR1	5.98627	19.6102	2.12118	0.858344	0.0532974	0.013991	0.148581	0.686581	821901	gene18976	NC_003074.8	8289379	8290164	786	-	protein_coding	TDR1	encodes a member of the ERF (ethylene response factor) subfamily B-3 of ERF/AP2 transcription factor family. The protein contains one AP2 domain. There are 18 members in this subfamily including ATERF-1, ATERF-2, AND ATERF-5.
AT2G15480	UGT73B5	5.98583	4.97694	1.942	1.25548	0.0154794	0.015704	0.228351	0.162326	816040	gene11681	NC_003071.7	6758430	6763501	5072	+	protein_coding	UGT73B5	.
AT5G00655	AT5G00655	5.98367	3.44754	2.40474	0.992582	0.027136	0.035011	0.379257	1	28720285	gene36025	NC_003076.8	21513786	21514356	571	+	misc_RNA	.	.
AT1G52827	CDT1	5.97845	5.72602	5.34745	5.15279	0.011247	0.0607524	0.300643	0.238428	2745823	gene6107	NC_003070.9	19671300	19672021	722	-	protein_coding	CDT1	Cysteine-rich protein that confers cadmium tolerance to yeast. Homologs are also found in rice, Brassica rapa and pine.
AT1G29395	COR413IM1	5.97198	6.83666	7.78627	8.01163	0.0151787	0.0261682	0.165805	0.0376861	839815	gene3647	NC_003070.9	10288129	10289666	1538	-	protein_coding	COR413IM1	Integral membrane protein in the inner envelope of chloroplasts. Provide freezing tolerance. Expression is induced by short-term cold-treatment, water deprivation, and abscisic acid treatment.
AT2G35270	GIK	0.666901	0.741229	0.356509	0.263774	0.132997	0.445388	0.0667448	0.0345606	818094	gene14297	NC_003071.7	14856664	14858134	1471	+	protein_coding	GIK	Direct target of AGAMOUS. Regulates patterning and differentiation of reproductive organs.
AT4G20390	CASP-like protein 1B2	0.603591	0.520052	0.251207	0.279512	0.0569478	0.0655771	0.0667448	0.0251739	827787	gene26887	NC_003075.7	11006815	11008076	1262	+	protein_coding	CASP-like protein 1B2	.
AT1G70850	MLP34	0.578761	0.621162	0.252864	0.395664	0.161907	0.226056	0.0667448	0.0292179	843422	gene8417	NC_003070.9	26714866	26716901	2036	-	protein_coding	MLP34	.
AT3G23430	PHO1	0.501087	0.522392	0.293078	0.317827	0.0180268	0.0206019	0.0667448	0.0255367	821924	gene19002	NC_003074.8	8387398	8393467	6070	-	protein_coding	PHO1	mutant is deficient in the transfer of phosphate from root epidermal and cortical cells to the xylem. encodes protein with the mainly hydrophilic N-terminal and the C-terminal containing 6 potential membrane-spanning domains.
AT5G52790	F6N7.28	0.352386	0.42	0.0743953	0.0742203	0.0303021	0.0342294	0.0667448	0.032239	835356	gene35987	NC_003076.8	21391566	21395016	3451	-	protein_coding	F6N7.28	.
AT1G75500	WAT1	0.265218	0.375587	0.304619	0.327189	0.012387	0.0174456	0.0667448	0.0338773	843886	gene8991	NC_003070.9	28337726	28340275	2550	-	protein_coding	WAT1	An Arabidopsis thaliana homolog of Medicago truncatula NODULIN21 (MtN21). The gene encodes a plant-specific, predicted integral membrane protein and is a member of the Plant-Drug/Metabolite Exporter (P-DME) family (Transporter Classification number: TC 2.A.7.3) and the nodulin MtN21-like transporter family.
AT4G22710	CYP706A2	5.89142	7.70644	1.96555	0.970872	0.0114837	0.026683	0.338805	0.45143	828367	gene27208	NC_003075.7	11934969	11936823	1855	+	protein_coding	CYP706A2	member of CYP706A
AT2G39870	T28M21.3	0.36248	0.35308	0.417985	0.340782	0.0275866	0.0305971	0.0672752	0.0251739	818574	gene14897	NC_003071.7	16643381	16645866	2486	+	protein_coding	T28M21.3	.
AT1G30840	PUP4	0.331328	0.425109	0.181053	0.178913	0.0583857	0.0728363	0.0672752	0.0339172	839967	gene3845	NC_003070.9	10974383	10976298	1916	+	protein_coding	PUP4	Member of a family of proteins related to PUP1, a purine transporter. May be involved in the transport of purine and purine derivatives such as cytokinins, across the plasma membrane.
AT3G45160	AT3G45160	0.307088	0.345315	0.184732	0.254298	0.0177742	0.0421536	0.0672752	0.0224682	823652	gene21202	NC_003074.8	16533428	16534265	838	-	protein_coding	.	.
AT5G24150	SQP1	5.85527	5.36439	1.24963	1.57741	0.0149903	0.0122452	0.549408	0.256548	832480	gene32241	NC_003076.8	8172300	8175525	3226	-	protein_coding	SQP1	squalene monooxygenase gene homolog
AT5G39670	MIJ24.17	5.85343	4.61903	1.2273	0.521291	0.0147415	0.0189592	0.734616	0.228611	833963	gene34236	NC_003076.8	15883179	15884067	889	+	protein_coding	MIJ24.17	.
AT4G27654	AT4G27654	5.84978	7.35	0.670677	0.537839	0.0700568	0.0194405	0.505546	0.0442408	828878	gene27868	NC_003075.7	13811612	13812126	515	+	protein_coding	.	.
AT5G35110	F7N22.20	5.84911	3.34242	1.63517	1.21991	0.0104467	0.0556658	0.056301	0.184359	28721214	gene33526	NC_003076.8	13363527	13364411	885	-	protein_coding	F7N22.20	.
AT3G28270	AT3G28270	5.84904	5.84368	1.00423	1.01489	0.0263375	0.0355409	0.734616	0.686581	822453	gene19700	NC_003074.8	10538005	10540070	2066	+	protein_coding	.	.
AT2G13820	XYP2	0.547695	0.572735	0.423771	0.405363	0.0537593	0.0679545	0.0673529	0.028221	815865	gene11424	NC_003071.7	5774089	5776342	2254	-	protein_coding	XYP2	.
AT5G59510	RTFL5	5.84743	4.16211	2.30491	1.83607	0.0295411	0.0686179	0.254896	0.233612	836070	gene36853	NC_003076.8	23989755	23990824	1070	+	protein_coding	RTFL5	.
AT4G11220	BTI2	2.82959	2.85855	2.8869	3.66607	0.0126934	0.0243009	0.0677431	0.0509548	826724	gene25535	NC_003075.7	6837911	6840036	2126	-	protein_coding	BTI2	.
AT4G23050	F7H19.240	4.45477	4.70634	2.97125	3.23571	0.0112467	0.0214407	0.0681615	0.0342886	828404	gene27251	NC_003075.7	12079859	12084362	4504	+	protein_coding	F7H19.240	.
AT3G54990	SMZ	2.77476	3.31401	3.47319	2.44053	0.0137186	0.0160828	0.0681615	0.0964865	824664	gene22524	NC_003074.8	20373718	20376522	2805	-	protein_coding	SMZ	Encodes a AP2 domain transcription factor that can repress flowering. SMZ and its paralogous gene, SNARCHZAPFEN (SNZ), share a signature with partial complementarity to the miR172 microRNA, whose precursor is induced upon flowering.
AT3G54420	EP3	5.82748	5.91894	2.24758	1.15182	0.0198438	0.0306506	0.129191	0.534666	824608	gene22452	NC_003074.8	20145905	20148266	2362	+	protein_coding	EP3	encodes an EP3 chitinase that is expressed during somatic embryogenesis in 'nursing' cells surrounding the embryos but not in embryos themselves. The gene is also expressed in mature pollen and growing pollen tubes until they enter the receptive synergid, but not in endosperm and integuments as in carrot. Post-embryonically, expression is found in hydathodes, stipules, root epidermis and emerging…
AT3G10930	AT3G10930	5.82011	5.43945	1.74042	1.49733	0.0202786	0.0290777	0.139652	0.170835	820264	gene17268	NC_003074.8	3420081	3420932	852	-	protein_coding	.	.
AT4G16680	DL4365C	5.80263	3.63018	2.15361	2.38898	0.024622	0.0339773	0.094582	0.0318815	827370	gene26372	NC_003075.7	9387393	9391726	4334	-	protein_coding	DL4365C	.
AT2G39200	MLO12	5.80236	5.81481	1.37905	0.589907	0.0300759	0.0328036	0.326523	0.102678	818505	gene14802	NC_003071.7	16356041	16359943	3903	-	protein_coding	MLO12	A member of a large family of seven-transmembrane domain proteins specific to plants, homologs of the barley mildew resistance locus o (MLO) protein. The Arabidopsis genome contains 15 genes encoding MLO proteins, with localization in plasma membrane. Phylogenetic analysis revealed four clades of closely-related AtMLO genes. ATMLO6 belongs to the clade IV, with AtMLO2, AtMLO3 and AtMLO12. The gen…
AT4G21120	AAT1	5.79548	4.76754	2.62887	1.71372	0.0112467	0.0228758	0.223436	0.127324	827860	gene26982	NC_003075.7	11269985	11274007	4023	+	protein_coding	AAT1	Encodes a member of the cationic amino acid transporter (CAT) subfamily of amino acid polyamine choline transporters. Mediates efficient uptake of Lys, Arg and Glu in a yeast system.
AT5G44550	CASP-like protein 1B1	0.500578	0.470888	0.249583	0.220139	0.0486129	0.0584586	0.0681615	0.0303974	834482	gene34895	NC_003076.8	17941842	17943283	1442	-	protein_coding	CASP-like protein 1B1	.
AT5G55090	MAPKKK15	5.76903	4.23571	1.73793	1.4705	0.00987685	0.0217372	0.241378	0.29767	835600	gene36288	NC_003076.8	22356852	22358413	1562	-	protein_coding	MAPKKK15	member of MEKK subfamily
AT5G15950	F1N13.90	5.75888	5.62089	1.57988	1.54774	0.00922849	0.0205837	0.167996	0.0875634	831452	gene31284	NC_003076.8	5205869	5208036	2168	+	protein_coding	F1N13.90	.
AT1G09605	AT1G09605	0.157995	0.211142	0.0982618	0.0901669	0.0509398	0.0606104	0.0681615	0.0222497	28717121	gene6217	NC_003070.9	20006460	20007015	556	-	misc_RNA	.	.
AT3G50970	LTI30	22.282	22.8936	5.63608	6.4164	0.00972893	0.0164941	0.0685144	0.0367683	824261	gene22016	NC_003074.8	18940643	18941611	969	+	protein_coding	LTI30	Belongs to the dehydrin protein family, which contains highly conserved stretches of 7-17 residues that are repetitively scattered in their sequences, the K-, S-, Y- and lysine rich segments. LTI29 and LTI30 double overexpressors confer freeze tolerance. Located in membranes. mRNA upregulated by water deprivation and abscisic acid.
AT4G06410	AT4G06410	5.73441	2.83848	2.39072	2.62414	0.0305045	0.0453852	0.231075	0.0253887	28719787	gene26371	NC_003075.7	9386180	9387271	1092	-	lncRNA	.	Natural antisense transcript overlaps with AT4G16670
AT3G16420	PBP1	3.15075	3.11739	2.61328	1.92046	0.020351	0.0424367	0.0685144	0.0417155	820890	gene36216	NC_003074.8	5579290	5581032	1743	+	protein_coding	PBP1	The PBP1(PYK10-binding protein 1) assists the PYK10 (beta-glucosidase complex) in its activity and may act like a molecular chaperone that facilitates the correct polymerization of PYK10, when tissues are damaged and subcellular structures are destroyed by pests.
AT5G43068	AT5G43068	2.04815	1.91089	7.71664	4.7518	0.409545	0.0137479	0.0685144	0.100518	28721244	gene34698	NC_003076.8	17286835	17287354	520	+	protein_coding	.	.
AT3G20340	AT3G20340	5.71354	4.6219	1.48152	1.37761	0.0185478	0.0890344	0.260328	0.482534	821578	gene18555	NC_003074.8	7092765	7093526	762	-	protein_coding	.	Expression of the gene is downregulated in the presence of paraquat, an inducer of photoxidative stress.
AT4G21440	MYB102	5.71129	6.16556	3.2813	9.21179	0.0134947	0.032924	0.0623576	0.0512589	826916	gene27028	NC_003075.7	11418199	11419769	1571	-	protein_coding	MYB102	Encodes a MYB transcription factor involved in wounding and osmotic stress response. Member of the R2R3 factor gene family.
AT3G21560	UGT84A2	1.07973	0.9744	2.85881	1.69918	0.192363	0.617822	0.0685144	0.080621	821710	gene18725	NC_003074.8	7595680	7597607	1928	+	protein_coding	UGT84A2	Encodes a protein with sinapic acid:UDP-glucose glucosyltransferase activity. Mutants defective in this gene are hyper-fluorescent (which accumulate in their trichomes a compound that is likely to be 3',5'-dimethoxynaringenin chalcone or sinapoyltriacetic acid lactone, potential products of the concerted action of 4-coumarate CoA ligase and chalcone synthase on sinapic acid). Also shown to be req…
AT3G25717	RTFL16	0.203831	0.301201	0.365194	0.335608	0.0287809	0.0384264	0.0685144	0.0329587	822160	gene19311	NC_003074.8	9375102	9375671	570	-	protein_coding	RTFL16	.
AT5G05220	K18I23.2	5.67239	5.69799	11.068	19.664	0.0299652	0.00476303	0.0961058	0.025289	830404	gene30022	NC_003076.8	1550251	1551022	772	+	protein_coding	K18I23.2	.
AT3G62260	AT3G62260	5.65184	6.29393	1.07834	0.925937	0.0387917	0.0137674	0.623255	0.663205	825399	gene23470	NC_003074.8	23038266	23040668	2403	-	protein_coding	.	.
AT5G35190	EXT13	0.105861	0.19337	0.11585	0.0657	0.0217363	0.0303284	0.068554	0.0338773	833473	gene33543	NC_003076.8	13434151	13435424	1274	+	protein_coding	EXT13	.
AT3G27390	AT3G27390	0.835041	0.795726	0.469179	0.462067	0.064016	0.0506222	0.0685991	0.0403031	822360	gene19565	NC_003074.8	10133177	10136665	3489	-	protein_coding	.	.
AT2G18800	XTH21	0.625896	0.798505	0.195211	0.138654	0.0853548	0.662842	0.0692157	0.0268778	816395	gene12119	NC_003071.7	8144881	8146477	1597	+	protein_coding	XTH21	.
AT5G08865	AT5G08865	5.62169	3.72911	0.270326	0.269975	0.658936	0.67153	0.734616	0.686581	28721013	gene36740	NC_003076.8	23683307	23683445	139	-	snoRNA	.	AtsnoR88-1
AT4G07820	F5K24.6	0.710298	0.900098	0.196147	0.128538	0.184689	0.555306	0.06922	0.0238994	826263	gene24941	NC_003075.7	4636624	4637450	827	-	protein_coding	F5K24.6	.
AT1G52690	LEA7	23.7116	30.8358	44.203	78.7676	0.0152265	0.020325	0.0694963	0.0251739	841701	gene6090	NC_003070.9	19619724	19621534	1811	+	protein_coding	LEA7	.
AT4G24960	HVA22D	23.3826	23.7907	13.1141	12.0577	0.0170012	0.0137479	0.0696226	0.0189443	828598	gene27508	NC_003075.7	12827856	12829303	1448	+	protein_coding	HVA22D	Homologous to a eukaryote specific ABA- and stress-inducible gene first isolated from barley. Groups in one subfamily with ATHVA22E. Along with other members of the ATHVA22 family, it may be involved in regulation of autophagy during development.
AT4G08775	AT4G08775	5.5894	2.77488	1.09111	1.19174	0.0150602	0.0729145	1	1	28720013	gene28584	NC_003075.7	16037779	16038165	387	+	lncRNA	.	.
AT1G58270	ZW9	3.72144	3.65076	4.99652	4.49626	0.011247	0.0137479	0.0696226	0.0329587	842196	gene6823	NC_003070.9	21611803	21614169	2367	-	protein_coding	ZW9	ZW9 mRNA, complete cds
AT5G52810	MXC20.2	5.57813	3.06285	0.869599	0.630793	0.0070528	0.0329463	0.734616	0.195185	835358	gene35990	NC_003076.8	21399331	21400686	1356	+	protein_coding	MXC20.2	.
AT1G70780	AT1G70780	3.34627	2.71999	2.45598	2.37469	0.0099945	0.0199446	0.0696226	0.0355547	843415	gene8409	NC_003070.9	26695166	26696392	1227	-	protein_coding	.	.
AT2G30362	AT2G30362	5.56815	7.81828	1.55336	1.67778	0.0186683	0.0223916	0.110826	0.0515089	5007913	gene13644	NC_003071.7	12937012	12939746	2735	+	lncRNA	.	Natural antisense transcript overlaps with AT2G30360~Potential natural antisense gene, locus overlaps with AT2G30360
AT1G30135	JAZ8	5.56321	4.08222	0.846461	0.644505	0.0522097	0.0444251	0.827189	0.170494	839893	gene3749	NC_003070.9	10596352	10597341	990	+	protein_coding	JAZ8	.
AT3G46080	AT3G46080	5.54846	2.9368	1.97395	1.62811	0.0323454	0.130787	0.32519	0.228034	823751	gene21339	NC_003074.8	16922514	16923299	786	-	protein_coding	.	.
AT4G15440	HPL1	5.54142	5.9155	1.42123	1.28881	0.034981	0.02171	0.0660732	0.0337603	827215	gene26191	NC_003075.7	8835368	8838676	3309	+	protein_coding	HPL1	Encodes a hydroperoxide lyase. Also a member of the CYP74B cytochrome p450 family. In the ecotype Columbia (Col) the gene contains a 10-nucleotide deletion in its first exon that causes it to code for a truncated protein that results in a non-functional hydroperoxide lyase.
AT5G62720	MQB2.4	0.469309	0.610332	0.370078	0.346244	0.0519577	0.0763686	0.0696226	0.0324271	836393	gene37242	NC_003076.8	25191402	25195071	3670	+	protein_coding	MQB2.4	.
AT4G18170	WRKY28	5.53078	4.41564	5.86162	4.3263	0.0192324	0.0137479	0.131891	0.129288	827542	gene26576	NC_003075.7	10061214	10062893	1680	+	protein_coding	WRKY28	member of WRKY Transcription Factor; Group II-c. Involved in the activation of salicylic acid biosynthesis genes ICS1 and PBS3.
AT5G41109	AT5G41109	5.51592	0.996431	0.38365	0.0819855	0.658936	0.454089	0.549421	0.0832956	6241036	gene34426	NC_003076.8	16452453	16452593	141	-	protein_coding	.	.
AT4G10270	T9A4.6	0.0979405	0.0883229	0.331244	0.356662	0.0395814	0.0422101	0.0696226	0.0480328	826619	gene25404	NC_003075.7	6374734	6375210	477	+	protein_coding	T9A4.6	.
AT1G69490	NAP	11.3357	11.762	7.14222	11.1935	0.0151528	0.012701	0.0697308	0.0404869	843282	gene8229	NC_003070.9	26122080	26123514	1435	+	protein_coding	NAP	Encodes a member of the NAC transcription factor gene family. It is expressed in floral primordia and upregulated by AP3 and PI. Its expression is associated with leaf senescence.
AT4G23550	WRKY29	1.89028	2.0999	5.39918	2.79016	0.0486572	0.0322096	0.0497661	0.0449769	828455	gene27317	NC_003075.7	12291632	12293367	1736	+	protein_coding	WRKY29	Encodes WRKY DNA-binding protein 29 (WRKY29).
AT5G01380	T10O8.90	17.3546	7.91009	9.12244	4.94101	0.0104467	0.0215484	0.06983	0.0306642	831895	gene29535	NC_003076.8	155610	157601	1992	-	protein_coding	T10O8.90	.
AT2G40340	DREB2C	5.49549	1.61959	6.30024	4.62857	0.0125218	0.0427647	0.105742	0.1046	818627	gene14966	NC_003071.7	16848160	16850494	2335	-	protein_coding	DREB2C	Encodes a member of the DREB subfamily A-2 of ERF/AP2 transcription factor family. The protein contains one AP2 domain. There are eight members in this subfamily including DREB2A AND DREB2B that are involved in response to drought.
AT2G47130	SDR3	0.707303	0.800146	0.426894	0.294724	0.0699311	0.216796	0.0698632	0.0398841	819326	gene15881	NC_003071.7	19349348	19350650	1303	-	protein_coding	SDR3	Encodes a short-chain dehydrogenase/reductase that is not involved in ABA biosynthesis but plays an important role in plant defense response to bacteria.
AT5G24080	MZF18.3	5.48088	8.995	8.47388	13.2463	0.0320963	0.0191637	0.0776718	0.0244981	832473	gene32232	NC_003076.8	8139111	8142432	3322	-	protein_coding	MZF18.3	.
AT5G39050	PMAT1	18.5171	8.99963	14.651	16.6502	0.018464	0.013153	0.0699002	0.0205715	833897	gene34150	NC_003076.8	15634444	15636480	2037	+	protein_coding	PMAT1	Encodes a malonyltransferase that may play a role in phenolic xenobiotic detoxification.
AT4G36990	HSF4	4.99575	4.33872	3.0657	3.27153	0.0166184	0.0228435	0.0699002	0.0434329	829853	gene29071	NC_003075.7	17440177	17442151	1975	+	protein_coding	HSF4	Encodes a protein whose sequence is similar to heat shock factors that regulate the expression of heat shock proteins. Transcript level is increased in response to heat shock. However, overexpression of this gene did not result in the increase of decrease of heat shock proteins.
AT2G21820	AT2G21820	5.46028	6.57696	1.72572	2.97615	0.0389202	0.0537244	0.279825	0.230666	816718	gene12521	NC_003071.7	9302853	9303408	556	-	protein_coding	.	.
AT2G46220	T3F17.13	0.868948	0.856935	0.363347	0.541579	0.251788	0.302745	0.0699002	0.034579	819229	gene15755	NC_003071.7	18979399	18980940	1542	+	protein_coding	T3F17.13	.
AT3G17130	AT3G17130	5.43887	4.77501	2.80519	3.11275	0.0204251	0.0292231	0.118274	0.173102	820970	gene18122	NC_003074.8	5844277	5845220	944	-	protein_coding	.	.
AT5G17350	MKP11.31	5.43736	10.169	0.960576	0.667424	0.043127	0.0144233	0.959892	0.0466309	831601	gene31455	NC_003076.8	5718498	5719608	1111	+	protein_coding	MKP11.31	.
AT2G47730	GSTF8	5.424	4.14518	1.29086	1.19752	0.01026	0.0137674	0.302911	0.179297	819386	gene15958	NC_003071.7	19556326	19559485	3160	+	protein_coding	GSTF8	Encodes glutathione transferase belonging to the phi class of GSTs. Naming convention according to Wagner et al. (2002).
AT1G48750	F11I4.8	0.736592	0.652714	0.303543	0.412849	0.0893761	0.107848	0.070214	0.035419	841297	gene5586	NC_003070.9	18035967	18036510	544	+	protein_coding	F11I4.8	.
AT1G18590	SOT17	1.24813	1.36698	2.10511	2.23191	0.0390045	0.0907201	0.0705116	0.0420639	838440	gene2312	NC_003070.9	6398531	6400029	1499	+	protein_coding	SOT17	encodes a desulfoglucosinolate sulfotransferase, involved in the final step of glucosinolate core structure biosynthesis. Has a broad-substrate specificity with preference with methionine-derived desulfoglucosinolates.
AT1G65490	F5I14.26	5.4032	4.58098	1.33344	0.818797	0.030981	0.0793386	0.297347	0.718059	842861	gene7702	NC_003070.9	24354646	24355490	845	+	protein_coding	F5I14.26	.
AT1G76680	OPR1	5.39967	4.87823	1.89025	1.11851	0.00385398	0.0183061	0.155067	0.221123	844001	gene9136	NC_003070.9	28776626	28778837	2212	+	protein_coding	OPR1	Encodes a member of an alpha/beta barrel fold family of FMN-containing oxidoreductases. One of the closely related 12-oxophytodienoic acid reductases. This enzyme is not expected to participate in jasmonic acid biosynthesis because during in vitro assays, it shows very little activity with the naturally occurring OPDA isomer. Shows activity towards 2,4,6-trinitrotoluene. Expressed predominately i…
AT1G21100	IGMT1	1.66872	2.14813	0.447268	0.597566	0.0432655	0.0319151	0.0711229	0.0819271	838706	gene2646	NC_003070.9	7386762	7388512	1751	-	protein_coding	IGMT1	.
AT5G03685	AT5G03685	5.39189	8.48566	7.49035	10.6118	0.0361842	0.133723	0.0770761	0.0720314	28720576	gene32233	NC_003076.8	8141667	8141975	309	+	lncRNA	.	.
AT5G24120	SIGE	5.39041	6.12593	1.09866	1.29781	0.014208	0.012217	0.740608	0.121587	832477	gene32238	NC_003076.8	8157151	8160343	3193	-	protein_coding	SIGE	Encodes a specialized sigma factor that functions in regulation of plastid genes and is responsible for the light-dependent transcription at the psbD LRP. Activation of SIG5 is dependent upon blue light and mediated by cryptochromes.
AT3G28220	AT3G28220	5.35402	6.01551	1.80018	1.04478	0.0134919	0.0236891	0.144562	0.575877	822448	gene19693	NC_003074.8	10524181	10526733	2553	+	protein_coding	.	.
AT3G29000	AT3G29000	5.35336	7.59919	1.07058	0.874826	0.0673246	0.0379055	0.299645	0.253142	822540	gene19825	NC_003074.8	11005638	11006514	877	+	protein_coding	.	.
AT1G51820	T14L22.3	5.34238	5.53793	2.27836	1.11393	0.0106072	0.0333028	0.150373	0.578865	841609	gene5971	NC_003070.9	19237219	19241965	4747	-	protein_coding	T14L22.3	.
AT1G43800	FTM1	0.463728	0.382248	0.142864	0.136673	0.0367868	0.0356583	0.0711229	0.0360821	840977	gene5150	NC_003070.9	16577521	16579722	2202	+	protein_coding	FTM1	.
AT5G16360	MQK4.8	5.32071	7.08624	0.840034	0.70813	0.00475032	0.0145793	0.513095	0.0985607	831497	gene31334	NC_003076.8	5354876	5356353	1478	-	protein_coding	MQK4.8	.
AT3G55130	ABCG19	5.31688	2.95244	1.02033	0.906921	0.0149173	0.0250588	1	0.346992	824679	gene22539	NC_003074.8	20433839	20436453	2615	-	protein_coding	ABCG19	Encodes a vacuole localized protein of the ABC transporter White-Brown Complex (WBC) family. When overexpressed in planta, confers resistance to kanamycin.
AT1G12805	AT1G12805	0.209303	0.177109	0.170587	0.237432	0.0320881	0.0260517	0.0720075	0.0380083	2745749	gene1570	NC_003070.9	4366577	4367136	560	+	protein_coding	.	.
AT2G38470	WRKY33	5.31445	7.23713	1.04183	0.732438	0.0163835	0.0151842	0.904455	0.154462	818429	gene14717	NC_003071.7	16108235	16110766	2532	+	protein_coding	WRKY33	Member of the plant WRKY transcription factor family. Regulates the antagonistic relationship between defense pathways mediating responses to P. syringae and necrotrophic fungal pathogens. Located in nucleus. Involved in response to various abiotic stresses - especially salt stress.
AT3G15210	ERF4	5.31339	6.32493	0.989372	1.10775	0.00636735	0.0224486	1	0.481225	820752	gene17856	NC_003074.8	5121303	5122562	1260	+	protein_coding	ERF4	Encodes a member of the ERF (ethylene response factor) subfamily B-1 of ERF/AP2 transcription factor family (ATERF-4). The protein contains one AP2 domain. Acts as a negative regulator of JA-responsive defense gene expression and resistance to the necrotrophic fungal pathogen Fusarium oxysporum and antagonizes JA inhibition of root elongation.
AT3G11260	WOX5	5.31116	3.0291	4.67237	4.83535	0.0253664	0.0742484	0.201579	0.0741595	820297	gene17303	NC_003074.8	3527280	3528440	1161	+	protein_coding	WOX5	Arabidopsis thaliana WOX5 protein mRNA
AT5G17305	AT5G17305	5.28833	3.8082	1.25002	4.16433	0.0918164	0.299569	1	0.249049	28721168	gene31449	NC_003076.8	5692700	5692924	225	+	protein_coding	.	.
AT1G73260	KTI1	5.24171	6.41283	3.40756	5.43656	0.0139705	0.020325	0.072242	0.0174508	843660	gene8706	NC_003070.9	27547098	27548282	1185	-	protein_coding	KTI1	Encodes a trypsin inhibitor involved in modulating programmed cell death in plant-pathogen interactions.
AT5G64100	MHJ24.8	0.586591	0.65887	0.468499	0.274953	0.00773773	0.0223904	0.072344	0.02194	836531	gene37410	NC_003076.8	25650567	25652247	1681	-	protein_coding	MHJ24.8	.
AT1G02205	CER1	5.26212	4.90677	2.65542	3.70733	0.0232644	0.0164645	0.0785353	0.0347531	837602	gene155	NC_003070.9	418416	422579	4164	+	protein_coding	CER1	Expression of the CER1 gene associated with production of stem epicuticular wax and pollen fertility. Biochemical studies showed that cer1 mutants are blocked in the conversion of stem wax C30 aldehydes to C29 alkanes, and they also lack the secondary alcohols and ketones. These suggested the CER1 protein is an aldehyde decarbonylase, but the exact molecular function of this protein remains to be…
AT1G11530	CXXS1	0.856486	0.810982	0.311483	0.32943	0.184597	0.182889	0.0727636	0.0376861	837696	gene1386	NC_003070.9	3874396	3875484	1089	+	protein_coding	CXXS1	Encodes a monocysteinic thioredoxin, thioredoxin in which the second cysteine of the redox site is replaced by a serine, with low disulfide reductase but efficient disulfide isomerase activity.
AT4G15390	DL3740C	0.358235	0.411988	0.30427	0.244645	0.0320963	0.0390782	0.0727636	0.0339172	827205	gene26181	NC_003075.7	8792707	8794442	1736	-	protein_coding	DL3740C	.
AT3G03440	T21P5.14	5.237	3.69089	1.39695	2.4796	0.0127888	0.0199446	0.20994	0.0422373	821253	gene16330	NC_003074.8	815550	818876	3327	+	protein_coding	T21P5.14	.
AT2G41105	AT2G41105	5.23368	8.11653	0.968124	0.407097	0.0448753	0.0409061	1	0.143397	28718340	gene15071	NC_003071.7	17138333	17139159	827	-	protein_coding	.	.
AT5G59520	ZIP2	0.303447	0.30319	0.227039	0.125369	0.0196536	0.0227088	0.0738331	0.0340081	836071	gene36854	NC_003076.8	23991213	23992908	1696	-	protein_coding	ZIP2	encodes a metal ion transporter whose expression is regulated by copper.
AT2G24560	F25P17.14	5.22875	3.12215	1.12553	1.08889	0.0504304	0.0345956	0.849631	0.699938	816992	gene12901	NC_003071.7	10431260	10433074	1815	+	protein_coding	F25P17.14	.
AT4G21910	T8O5.120	1.65521	1.55348	2.15817	1.62042	0.0140449	0.0369799	0.074015	0.0484571	828280	gene27092	NC_003075.7	11625309	11631255	5947	-	protein_coding	T8O5.120	.
AT5G59580	UGT76E1	5.22232	3.81794	7.08492	3.04562	0.0152265	0.0233877	0.0351777	0.0576893	836077	gene36861	NC_003076.8	24005949	24007907	1959	-	protein_coding	UGT76E1	.
AT4G23190	CRK11	5.21267	5.2994	1.08159	0.618712	0.0112683	0.0130036	0.384072	0.150163	828418	gene27266	NC_003075.7	12140899	12143858	2960	-	protein_coding	CRK11	Encodes putative receptor-like protein kinase that is induced by the soil-borne vascular bacteria, Ralstonia solanacearum. Naming convention from Chen et al 2003 (PMID 14756307)
AT2G29450	GSTU5	11.9372	10.2849	11.174	11.2304	0.012387	0.0149118	0.0743239	0.0226321	817494	gene13534	NC_003071.7	12624403	12625790	1388	-	protein_coding	GSTU5	Encodes a member of the TAU glutathione S-transferase gene family. Gene expression is induced by exposure to auxin, pathogen and herbicides. Naming convention according to Wagner et al. (2002)
AT4G23060	IQD22	5.19893	4.17389	1.75234	0.93482	0.0127303	0.0231229	0.415825	0.589613	828405	gene27253	NC_003075.7	12086898	12090714	3817	+	protein_coding	IQD22	.
AT2G30130	ASL5	3.18551	2.64079	3.93753	2.48966	0.0254442	0.0775437	0.0743239	0.0842676	817565	gene13618	NC_003071.7	12868461	12870045	1585	+	protein_coding	ASL5	Overexpression/activation tagged allele has epinastic leaves, reduced apical dominance and is sterile. Gene is similar to asymmetric leaves (AS)/lateral organ boundary (LOB) genes which repress KNOX gene expression.
AT5G54810	TSB1	1.4432	2.05342	2.57541	2.58606	0.0155838	0.013153	0.0743239	0.0396554	835571	gene36257	NC_003076.8	22264594	22266902	2309	-	protein_coding	TSB1	A.thaliana tryptophan synthase beta subunit (trpB)
AT3G51910	HSFA7A	0.682784	0.5189	0.378687	0.796693	0.0205079	0.0160626	0.0743239	0.0575479	824354	gene22129	NC_003074.8	19265141	19266806	1666	+	protein_coding	HSFA7A	member of Heat Stress Transcription Factor (Hsf) family
AT1G64370	F15H21.1	0.563103	0.731398	0.428602	0.932507	0.0360581	0.0616994	0.0743239	0.0571123	842744	gene7544	NC_003070.9	23888832	23890132	1301	+	protein_coding	F15H21.1	.
AT2G37760	AKR4C8	5.18308	5.17606	1.52874	2.1101	0.0169695	0.0419149	0.170016	0.0531236	818353	gene14623	NC_003071.7	15831656	15833921	2266	+	protein_coding	AKR4C8	Encodes an NADPH-dependent aldo-keto reductase that can act on a wide variety of substrates in vitro including aliphatic and aromatic aldehydes and steroids. Transcript levels for this gene are up-regulated in response to cold, salt, and drought stress.
AT1G21550	F24J8.15	5.18196	4.75228	2.13792	1.87364	0.0295411	0.0129474	0.109972	0.557541	838756	gene2711	NC_003070.9	7552987	7553975	989	-	protein_coding	F24J8.15	.
AT1G48000	MYB112	5.17676	5.33041	4.17688	5.66108	0.0458006	0.0417216	0.2316	0.0244981	841218	gene5482	NC_003070.9	17704132	17706460	2329	-	protein_coding	MYB112	Encodes a putative transcription factor (MYB112).
AT2G17710	T17A5.17	0.435749	0.532218	0.298521	0.401165	0.00925104	0.0409738	0.0743239	0.0431343	816280	gene11984	NC_003071.7	7693596	7694746	1151	+	protein_coding	T17A5.17	.
AT3G25930	AT3G25930	0.33149	0.382359	0.375368	0.395772	0.0366864	0.043617	0.0744401	0.0226321	822190	gene19346	NC_003074.8	9492765	9494302	1538	-	protein_coding	.	.
AT1G79410	OCT5	5.15132	2.61836	0.651695	0.529407	0.0144279	0.0579515	0.22481	0.0672417	844279	gene9499	NC_003070.9	29867854	29869784	1931	-	protein_coding	OCT5	.
AT5G28520	T26D3.3	12.41	8.2731	19.7593	25.0367	0.00483678	0.0269215	0.0747115	0.0186347	832945	gene32878	NC_003076.8	10492977	10495011	2035	+	protein_coding	T26D3.3	.
AT1G76790	IGMT5	3.63042	3.35718	3.64568	4.26089	0.0146209	0.0137479	0.0756152	0.0221898	844013	gene9157	NC_003070.9	28822186	28823727	1542	-	protein_coding	IGMT5	.
AT2G47800	ABCC4	3.51417	2.28452	3.61158	3.18017	0.0149784	0.0137479	0.0756152	0.0224682	819392	gene15968	NC_003071.7	19574666	19580615	5950	+	protein_coding	ABCC4	Encodes a plasma membrane localized ATPase transporter involved in multidrug transport. The expression of this gene is upregulated by herbicide safeners such as benoxacor, fluxofenim and fenclorim.
AT5G04770	CAT6	1.11964	1.32458	2.04972	2.45175	0.0501791	0.145157	0.0756152	0.0309014	830355	gene29967	NC_003076.8	1378621	1382478	3858	+	protein_coding	CAT6	Encodes a member of the cationic amino acid transporter (CAT) subfamily of amino acid polyamine choline transporters. Does not mediate efficient uptake of basic amino acids in yeast or Xenopus systems but can transport neutral and acidic amino acid analogs. Expressed in sink tissues. Induced during infestation of roots by the plant parasitic root-knot nematode, Meloidogyne incognita. Localized in…
AT4G03210	XTH9	0.189804	0.170561	0.247404	0.160357	0.0560252	0.0584586	0.0756152	0.0336269	828024	gene24121	NC_003075.7	1415617	1417444	1828	+	protein_coding	XTH9	encodes a member of xyloglucan endotransglucosylase/hydrolases (XTHs) that catalyze the cleavage and molecular grafting of xyloglucan chains function in loosening and rearrangement of the cell wall. Gene is expressed in shoot apex region, flower buds, flower stalks and internodes bearing flowers.
AT5G13370	T22N19.20	5.12256	3.8674	2.843	4.61266	0.0136476	0.0331921	0.0530826	0.0251739	831178	gene30955	NC_003076.8	4286740	4289663	2924	+	protein_coding	T22N19.20	.
AT1G08803	AT1G08803	1.27973	1.39272	0.148443	0.143531	0.346771	0.0577836	0.0756393	0.0336269	28716911	gene7763	NC_003070.9	24558112	24558312	201	+	lncRNA	.	Natural antisense transcript overlaps with AT1G65970
AT5G49690	K2I5.5	5.09228	5.28051	2.58735	3.50048	0.015304	0.0141211	0.101787	0.0179337	835032	gene35588	NC_003076.8	20189655	20191604	1950	-	protein_coding	K2I5.5	.
AT5G42250	K5J14.6	0.478651	0.629932	0.371228	0.352041	0.0543751	0.084293	0.0756393	0.0412209	834230	gene34574	NC_003076.8	16893849	16897690	3842	+	protein_coding	K5J14.6	.
AT3G50930	BCS1	5.06857	4.25008	1.70357	1.00163	0.0241972	0.0155927	0.0612868	1	824257	gene22011	NC_003074.8	18929526	18932181	2656	+	protein_coding	BCS1	Encodes a protein that is present in a homo-multimeric protein complex on the outer mitochondrial membrane and plays a role in cell death and amplifying salicylic acid signalling.
AT4G04485	AT4G04485	5.06629	5.39441	8.82565	1.00067	0.0186683	0.0375954	0.16318	0.686581	28719567	gene24135	NC_003075.7	1446117	1446259	143	-	snoRNA	.	AtsnoR134-3
AT4G36795	AT4G36795	5.06354	3.13327	1.27085	4.17628	0.491784	0.112553	0.909776	0.293258	28720210	gene29043	NC_003075.7	17338904	17339161	258	+	protein_coding	.	.
AT3G25250	AGC2-1	5.06117	2.66895	1.81987	1.2135	0.0330641	0.0538648	0.220569	0.158017	822119	gene19258	NC_003074.8	9195334	9197126	1793	+	protein_coding	AGC2-1	Arabidopsis protein kinase
AT2G32530	CSLB03	5.05965	3.4716	0.985503	1.17721	0.0185478	0.030355	1	0.343445	817814	gene13933	NC_003071.7	13809019	13813572	4554	+	protein_coding	CSLB03	encodes a gene similar to cellulose synthase
AT1G01030	NGA3	5.04953	3.43193	1.34178	1.26232	0.0179371	0.0529385	0.491106	0.410265	839321	gene3	NC_003070.9	11649	13714	2066	-	protein_coding	NGA3	.
AT4G15760	MO1	5.03054	2.66213	1.89065	1.40872	0.0111769	0.0194405	0.229655	0.0345606	827255	gene26231	NC_003075.7	8972649	8974769	2121	-	protein_coding	MO1	Encodes a protein with similarity to monooxygenases that are known to degrade salicylic acid (SA).
AT4G16950	RPP5	0.900972	0.887854	0.408873	0.329808	0.274721	0.256458	0.0757369	0.0360821	827403	gene26420	NC_003075.7	9538233	9544755	6523	-	protein_coding	RPP5	Contains a putative nucleotide binding site and leucine-rich repeats. Similar to the plant resistance genes N and L6, and to the toll and interleukin-1 receptors. Confers resistance to Peronospora parasitica.
AT3G04070	NAC047	5.68095	6.6572	5.13068	5.8337	0.0142785	0.0225287	0.0760826	0.0174508	819562	gene16414	NC_003074.8	1061300	1063234	1935	-	protein_coding	NAC047	.
AT4G39980	DHS1	1.40015	1.87804	2.50131	2.57396	0.0152548	0.0137479	0.0763983	0.0336269	830159	gene29457	NC_003075.7	18539511	18542122	2612	+	protein_coding	DHS1	Encodes a 2-deoxy-D-arabino-heptulosonate 7-phosphate (DAHP) synthase, which catalyzes the first committed step in aromatic amino acid biosynthesis. Gene expression is induced by wounding and pathogenic bacteria Pseudomonas syringae.
AT5G11650	T22P22.40	5.01657	5.24314	1.50799	0.866085	0.00937107	0.0149349	0.229704	0.194837	831037	gene30791	NC_003076.8	3744698	3747198	2501	+	protein_coding	T22P22.40	.
AT3G15353	MT3	0.816287	0.93816	0.299493	0.592738	0.0221882	0.453877	0.0763983	0.0673622	820771	gene17885	NC_003074.8	5180642	5181586	945	-	protein_coding	MT3	metallothionein, binds to and detoxifies excess copper and other metals, limiting oxidative damage
AT1G73330	DR4	0.586717	0.674818	0.274284	0.487025	0.0649333	0.104545	0.0763983	0.0314419	843668	gene8714	NC_003070.9	27568714	27569823	1110	-	protein_coding	DR4	encodes a plant-specific protease inhibitor-like protein whose transcript level in root disappears in response to progressive drought stress. The decrease in transcript level is independent from abscisic acid level.
AT2G01950	BRL2	0.50757	0.5716	0.352076	0.394295	0.0141458	0.0342819	0.0764326	0.0360625	814726	gene9841	NC_003071.7	440624	444324	3701	-	protein_coding	BRL2	Encodes a leucine rich repeat receptor kinase and associated with provascular/procambial cells. Similar to BRI, brassinosteroid receptor protein.
AT3G15350	AT3G15350	1.47756	1.46404	2.1016	1.917	0.0418062	0.0560293	0.0770021	0.041076	820766	gene17877	NC_003074.8	5166175	5169229	3055	+	protein_coding	.	.
AT1G33110	T9L6.1	4.98865	3.50604	1.51548	1.65457	0.0174719	0.0234191	0.102556	0.0337397	840207	gene4172	NC_003070.9	12004854	12008852	3999	+	protein_coding	T9L6.1	.
AT3G11340	UGT76B1	4.98435	2.49103	1.75585	1.71414	0.0156757	0.0142253	0.0991437	0.0365543	820307	gene17313	NC_003074.8	3556554	3558361	1808	+	protein_coding	UGT76B1	Encodes a glucosyltransferase that conjugates isoleucic acid and modulates plant defense and senescence.
AT4G08425	AT4G08425	4.97893	3.75979	0.999939	1.31525	0.658936	0.67153	1	0.745704	28719989	gene28295	NC_003075.7	15100386	15100550	165	+	snoRNA	.	snoR102-2
AT4G34135	UGT73B2	14.4943	6.50844	3.31352	2.44803	0.0194751	0.0154361	0.0770281	0.0298803	829560	gene28705	NC_003075.7	16345150	16347434	2285	-	protein_coding	UGT73B2	The At4g34135 gene encodes a flavonol 7-O-glucosyltransferase (EC 2.4.1.237) that glucosylates also with a 20 fold lower activity flavonols (kaempferol and quercetin) at the 3-O-position.
AT1G61255	AT1G61255	4.96464	5.21911	1.13816	0.994965	0.0238353	0.020028	0.919318	1	842419	gene7115	NC_003070.9	22589098	22589789	692	-	protein_coding	.	.
AT4G27657	AT4G27657	4.93591	5.64666	0.935532	0.887295	0.0092566	0.0215484	0.915851	0.448218	828879	gene27869	NC_003075.7	13812989	13813701	713	+	protein_coding	.	.
AT3G09600	RVE8	4.92342	4.70591	0.857125	0.949204	0.0111276	0.0395872	0.995584	0.686581	820117	gene17097	NC_003074.8	2946239	2949017	2779	+	protein_coding	RVE8	Encodes a MYB-like transcription factor similar to CIRCADIAN CLOCK-ASSOCIATED1 (CCA1) and ELONGATED HYPOCOTYL (LHY). Involved in the regulation of circadian clock by modulating the pattern of histone 3 (H3) acetylation.
AT3G21670	AtNPF6.4	4.91149	5.15442	2.13904	2.78408	0.0124198	0.0154361	0.129191	0.0461571	821721	gene18736	NC_003074.8	7626757	7629205	2449	-	protein_coding	AtNPF6.4	.
AT1G51090	F23H24.15	50.4873	38.1005	11.4612	7.57822	0.00636735	0.0219965	0.0770761	0.0272417	841532	gene5880	NC_003070.9	18932766	18934049	1284	+	protein_coding	F23H24.15	.
AT2G09335	AT2G09335	4.90437	5.92139	1.42697	2.04174	0.04718	0.142005	0.799145	0.178806	28718129	gene15221	NC_003071.7	17572719	17574482	1764	-	lncRNA	.	Natural antisense transcript overlaps with AT2G42150
AT3G50480	HR4	4.90393	4.72583	0.702475	0.557707	0.017645	0.0159562	0.443563	0.0899092	824212	gene21947	NC_003074.8	18733021	18734420	1400	+	protein_coding	HR4	Homolog of RPW8
AT5G58700	PLC4	3.6996	3.12958	3.21629	2.324	0.0142785	0.0185721	0.0770761	0.0268778	835984	gene36753	NC_003076.8	23712827	23716391	3565	-	protein_coding	PLC4	.
AT5G48010	THAS1	2.90257	2.18859	2.59085	1.81871	0.016373	0.0211785	0.0770761	0.047125	834852	gene35356	NC_003076.8	19456837	19461706	4870	+	protein_coding	THAS1	Encodes an oxidosqualene cyclase involved in the biosynthesis of thalianol, a tricyclic triterpenoid of unknown function. Overexpression of THAS leads to dwarfing in the aerial tissues of Arabidopsis plants, but increases their root length. THAS is part of a small operon-like cluster of genes (with At5g48000 (THAH) and At5g47990 (THAD)) involved in thalianol metabolism.
AT1G07903	AT1G07903	4.895	0.998066	0.147655	0.147469	0.658936	0.562531	0.734616	0.686581	28716739	gene6209	NC_003070.9	19981637	19981752	116	+	snoRNA	.	snoR138
AT3G48310	CYP71A22	4.87873	2.81448	0.986273	0.992452	0.0106072	0.0207188	0.869087	1	823989	gene21668	NC_003074.8	17887996	17889942	1947	+	protein_coding	CYP71A22	putative cytochrome P450
AT4G23600	CORI3	4.87591	7.30632	1.10787	1.32167	0.0112615	0.0181066	0.327666	0.19493	828460	gene27326	NC_003075.7	12310379	12313212	2834	+	protein_coding	CORI3	Encodes cystine lyase which is expected to be involved in amino acid metabolism, providing the plant with cysteine and the generation of precursors of ethylene biosynthesis. mRNA levels are elevated in response to wounding.
AT2G39980	T28M21.14	4.86373	5.67047	0.734614	1.03273	0.00999249	0.013153	0.296767	1	818586	gene14911	NC_003071.7	16687673	16690182	2510	-	protein_coding	T28M21.14	.
AT2G46400	WRKY46	4.85844	4.79992	0.910884	0.582116	0.0438078	0.0337449	0.502339	0.0484571	819248	gene15778	NC_003071.7	19043411	19044955	1545	-	protein_coding	WRKY46	member of WRKY Transcription Factor; Group III
AT3G18000	XPL1	0.254426	0.207886	0.4624	0.512029	0.0420626	0.0419149	0.0770761	0.045748	821324	gene18238	NC_003074.8	6154363	6157552	3190	+	protein_coding	XPL1	Arabidopsis thaliana N-methyltransferase-like protein mRNA. Reduce transmission through pollen.
AT1G20070	T20H2.15	8.31114	12.6113	3.04238	4.19118	0.0125218	0.013523	0.0771055	0.027565	838596	gene2504	NC_003070.9	6958010	6959148	1139	-	protein_coding	T20H2.15	.
AT4G15490	UGT84A3	4.85727	5.23223	1.51356	2.0601	0.0125218	0.012701	0.375567	0.0535393	827221	gene26197	NC_003075.7	8852656	8854706	2051	-	protein_coding	UGT84A3	Encodes a protein that might have sinapic acid:UDP-glucose glucosyltransferase activity.
AT5G01815	AT5G01815	4.85512	4.2718	1.24084	1.4369	0.0144655	0.0387569	0.734616	0.0510975	28720416	gene30676	NC_003076.8	3377666	3378106	441	-	lncRNA	.	Natural antisense transcript overlaps with AT5G10695
AT2G32200	F22D22.5	1.7248	3.79616	3.79818	1.63614	0.0206604	0.136673	0.0771055	0.165009	817779	gene13889	NC_003071.7	13676389	13677306	918	+	protein_coding	F22D22.5	.
AT1G68238	AT1G68238	0.559339	0.742767	0.272348	0.130149	0.073973	0.133101	0.0771254	0.0255367	6241144	gene8059	NC_003070.9	25574381	25574835	455	+	protein_coding	.	.
AT4G36880	CP1	11.0086	7.7713	2.69215	1.83783	0.0205079	0.0324742	0.0775314	0.036255	829841	gene35555	NC_003075.7	17374454	17376279	1826	-	protein_coding	CP1	.
AT3G05145	AT3G05145	4.82513	4.97704	0.912612	0.675852	0.0962671	0.0832759	1	0.697556	28718816	gene19530	NC_003074.8	10025823	10026049	227	-	lncRNA	.	Natural antisense transcript overlaps with AT3G27170
AT2G01520	MLP328	0.719661	0.727397	0.245588	0.366985	0.084673	0.105882	0.0775314	0.0310399	814681	gene9781	NC_003071.7	235925	237253	1329	+	protein_coding	MLP328	Encodes a cis-cinnamic acid responsive gene that is a member of the major latex protein-like gene family and plays a role in promoting vegetative growth and delaying flowering.
AT5G26770	F2P16.30	4.79511	4.48599	1.12739	0.902687	0.0168291	0.022938	0.734616	0.410202	832735	gene32578	NC_003076.8	9407647	9410138	2492	-	protein_coding	F2P16.30	.
AT3G54260	TBL36	0.673489	0.726438	0.329017	0.522204	0.0789972	0.139507	0.07754	0.0339908	824593	gene22435	NC_003074.8	20084971	20086967	1997	-	protein_coding	TBL36	Encodes a member of the TBL (TRICHOME BIREFRINGENCE-LIKE) gene family containing a plant-specific DUF231 (domain of unknown function) domain. TBL gene family has 46 members, two of which (TBR/AT5G06700 and TBL3/AT5G01360) have been shown to be involved in the synthesis and deposition of secondary wall cellulose, presumably by influencing the esterification state of pectic polymers. A nomenclature…
AT5G04950	NAS1	0.301306	0.314609	0.258159	0.176496	0.0243964	0.0307703	0.07754	0.0356134	830377	gene29991	NC_003076.8	1457641	1459039	1399	-	protein_coding	NAS1	Encodes a nicotianamide synthase.
AT5G41040	RWP1	2.20662	2.1088	2.50076	2.39958	0.0123761	0.0298743	0.0778156	0.0428261	834106	gene34416	NC_003076.8	16431304	16433305	2002	+	protein_coding	RWP1	Encodes a feruloyl-CoA transferase required for suberin synthesis. Has feruloyl-CoA-dependent feruloyl transferase activity towards substrates with a primary alcohol.
AT1G04197	AT1G04197	4.77946	4.83801	0.32117	0.320763	0.0184995	0.67153	0.734616	0.686581	28716071	gene330	NC_003070.9	875679	875823	145	-	snoRNA	.	AtsnoR134-1
AT4G31860	F11C18.60	4.77829	3.28717	1.93738	2.10656	0.0227787	0.0406146	0.179363	0.0360821	829315	gene28410	NC_003075.7	15406439	15409056	2618	-	protein_coding	F11C18.60	.
AT1G20160	ATSBT5.2	1.51178	1.76789	0.429925	0.502487	0.10323	0.0424064	0.0778156	0.0320031	838606	gene2517	NC_003070.9	6990642	6993989	3348	-	protein_coding	ATSBT5.2	.
AT5G25610	RD22	4.72712	5.35257	7.87212	9.94975	0.0113032	0.0145377	0.0780214	0.051396	832636	gene32439	NC_003076.8	8914122	8916856	2735	-	protein_coding	RD22	responsive to dehydration 22 (RD22) mediated by ABA
AT3G22275	AT3G22275	4.7525	5.69791	3.94318	2.13399	0.0322456	0.0352002	0.230283	0.0770727	5008022	gene18837	NC_003074.8	7878807	7879810	1004	-	protein_coding	.	.
AT2G14100	CYP705A13	0.824981	1.03709	0.415047	0.607498	0.148263	0.712477	0.0780214	0.0630358	815896	gene11462	NC_003071.7	5934483	5936371	1889	-	protein_coding	CYP705A13	a member of the cytochrome P450 family
AT5G12030	HSP17.6A	4.74968	1.32338	2.10597	3.7435	0.0204666	0.23815	0.0653872	0.137844	831076	gene30834	NC_003076.8	3883957	3884838	882	-	protein_coding	HSP17.6A	Encodes a cytosolic small heat shock protein with chaperone activity that is induced by heat and osmotic stress and is also expressed late in seed development.
AT1G32940	SBT3.5	4.74062	2.60934	1.44023	1.43569	0.0230408	0.02171	0.24447	0.0382059	840188	gene4149	NC_003070.9	11937183	11941116	3934	+	protein_coding	SBT3.5	.
AT1G05570	CALS1	0.788621	0.827846	0.433624	0.394289	0.0491056	0.0418726	0.0787816	0.0186347	837059	gene606	NC_003070.9	1647575	1659611	12037	-	protein_coding	CALS1	Encodes a callose synthase 1 catalytic subunit . Member of Glycosyltransferase Family- 48.
AT1G07720	KCS3	4.72506	4.58448	5.13419	5.54222	0.0120589	0.0206934	0.0764373	0.0229205	837286	gene897	NC_003070.9	2390531	2392628	2098	-	protein_coding	KCS3	Encodes KCS3, a member of the 3-ketoacyl-CoA synthase family involved in the biosynthesis of VLCFA (very long chain fatty acids).
AT4G22820	F7H19.10	4.70197	4.41261	1.72567	1.70111	0.0214415	0.0156381	0.367343	0.0502698	828381	gene27227	NC_003075.7	11987649	11989087	1439	-	protein_coding	F7H19.10	.
AT2G34355	AT2G34355	4.68602	2.08927	1.9322	1.599	0.0297325	0.0458204	0.19935	0.0641066	817998	gene14181	NC_003071.7	14496206	14498510	2305	+	protein_coding	.	.
AT3G01260	T4P13.5	0.235479	0.283904	0.145751	0.10588	0.0312475	0.0238363	0.0790012	0.0358443	821171	gene16045	NC_003074.8	80003	82182	2180	-	protein_coding	T4P13.5	.
AT5G44575	AT5G44575	4.68082	4.82638	0.740113	0.755312	0.036634	0.0348658	0.529739	0.296365	834485	gene34911	NC_003076.8	17973775	17975120	1346	+	protein_coding	.	.
AT1G69930	GSTU11	4.67837	6.3114	7.30611	4.48517	0.113931	0.0194405	0.177531	0.0251739	843329	gene8300	NC_003070.9	26337481	26338818	1338	-	protein_coding	GSTU11	Encodes glutathione transferase belonging to the tau class of GSTs. Naming convention according to Wagner et al. (2002).
AT3G11840	PUB24	4.67803	6.65307	1.05904	0.98423	0.0179257	0.0154361	0.784166	1	820357	gene17385	NC_003074.8	3736578	3738208	1631	-	protein_coding	PUB24	Encodes a U-box-domain-containing E3 ubiquitin ligase that acts as a negative regulator of PAMP-triggered immunity.
AT5G00990	AT5G00990	3.77788	3.91032	2.80946	3.73971	0.00996556	0.0214437	0.0794184	0.0593925	28720349	gene29965	NC_003076.8	1373673	1374232	560	+	lncRNA	.	Natural antisense transcript overlaps with AT5G04760
AT4G33720	AT4G33720	0.67254	1.42165	3.12583	0.34417	0.0126934	0.27467	0.0794184	0.0537674	829514	gene28643	NC_003075.7	16182743	16183619	877	+	protein_coding	.	.
AT3G56790	AT3G56790	4.64759	4.00378	0.410047	0.22864	0.0218293	0.0536903	0.113625	0.0415314	824846	gene22758	NC_003074.8	21033777	21034455	679	-	protein_coding	.	.
AT1G72150	PATL1	0.545492	0.61203	0.370172	0.40654	0.0112467	0.0256986	0.0794184	0.0268778	843546	gene8572	NC_003070.9	27148261	27150994	2734	+	protein_coding	PATL1	novel cell-plate-associated protein that is related in sequence to proteins involved in membrane trafficking in other eukaryotes
AT3G23810	SAHH2	1.57609	1.48909	3.19679	2.56739	0.0479653	0.060381	0.0797613	0.0224682	821964	gene19058	NC_003074.8	8587622	8589754	2133	-	protein_coding	SAHH2	.
AT4G28520	CRU3	4.63958	0.87215	3.69648	1.07262	0.0110433	0.351315	0.202542	0.5019	828970	gene27979	NC_003075.7	14087556	14089796	2241	+	protein_coding	CRU3	Encodes a 12S seed storage protein that is tyrosine-phosphorylated and its phosphorylation state is modulated in response to ABA in Arabidopsis thaliana seeds.
AT1G28480	GRX480	18.2962	13.3148	2.71458	1.40989	0.0305953	0.012701	0.0797705	0.30866	839748	gene3528	NC_003070.9	10013434	10014256	823	-	protein_coding	GRX480	Encodes GRX480, a member of the glutaredoxin family that regulates protein redox state. GRX480 interacts with TGA factors and suppresses JA-responsive PDF1.2 transcription. GRX480 transcription is SA-inducible and requires NPR1. Maybe involved in SA/JA cross-talk.
AT1G21410	SKP2A	4.63705	3.92736	1.51274	2.63373	0.00972893	0.0137479	0.116962	0.0270741	838740	gene2693	NC_003070.9	7496998	7499616	2619	+	protein_coding	SKP2A	AtSKP2;1 is a homolog of human SKP2, the human F-box protein that recruits E2F1. Contains an F-box motif at the N-terminal region and a C-terminal Leu-rich repeat domain. Forms part of an E3-ubiquitin-ligase SCF (Skp1, cullin, F-box) complex and recruits phosphorylated AtE2Fc, a transcriptional factor that might play a role in cell division and during the transition from skotomorphogenesis to pho…
AT3G17609	HYH	4.62809	4.06023	0.851551	0.754851	0.0153654	0.0159562	0.256383	0.150309	821027	gene18186	NC_003074.8	6023844	6024710	867	+	protein_coding	HYH	Encodes a homolog of HY5 (HYH). Involved in phyB signaling pathway.
AT3G02480	F16B3.11	29.8633	43.3192	103.171	264.636	0.01552	0.0271554	0.0798613	0.0174508	821185	gene16211	NC_003074.8	512220	513036	817	+	protein_coding	F16B3.11	.
AT1G78210	T11I11.15	2.76404	2.56724	3.50353	2.67406	0.0106072	0.0137674	0.0800251	0.0778762	844157	gene9349	NC_003070.9	29422716	29424589	1874	-	protein_coding	T11I11.15	.
AT2G39700	EXPA4	0.579179	0.613185	0.480169	0.461028	0.0232348	0.0363659	0.0800251	0.0274213	818553	gene14867	NC_003071.7	16543832	16545746	1915	-	protein_coding	EXPA4	putative expansin. Naming convention from the Expansin Working Group (Kende et al, 2004. Plant Mol Bio). Involved in the formation of nematode-induced syncytia in roots of Arabidopsis thaliana.
AT4G21930	F1N20.2	4.5869	6.01652	1.52092	2.36846	0.0228203	0.0689236	0.634041	0.270398	828282	gene27095	NC_003075.7	11639757	11640583	827	+	protein_coding	F1N20.2	.
AT5G12020	HSP17.6II	4.58536	1.45282	1.65894	1.93152	0.0546764	0.137155	0.0730062	0.229142	831075	gene30833	NC_003076.8	3882231	3883111	881	-	protein_coding	HSP17.6II	.
AT1G06570	PDS1	4.0024	3.84338	3.08711	4.39716	0.0222796	0.0150921	0.0800303	0.0268778	837168	gene742	NC_003070.9	2011885	2013545	1661	-	protein_coding	PDS1	Mutation of the PDS1 locus disrupts the activity of p-hydroxyphenylpyruvate dioxygenase (HPPDase), the first committed step in the synthesis of both plastoquinone and tocopherols in plants.
AT3G24520	HSFC1	4.57393	4.42722	1.17772	1.34111	0.0245088	0.0190006	0.464661	0.0903218	822047	gene19160	NC_003074.8	8941066	8942874	1809	+	protein_coding	HSFC1	member of Heat Stress Transcription Factor (Hsf) family
AT2G21130	F26H11.11	3.11186	2.73698	4.6488	5.84938	0.0271785	0.0348068	0.0800303	0.048839	816648	gene12427	NC_003071.7	9055398	9056481	1084	-	protein_coding	F26H11.11	.
AT2G24100	ASG1	4.56511	3.29714	1.41206	1.54492	0.0154698	0.0164645	0.282445	0.0612629	816944	gene12827	NC_003071.7	10244745	10246994	2250	+	protein_coding	ASG1	.
AT5G52320	CYP96A4	4.56016	5.80561	0.805383	0.807004	0.01107	0.0247581	0.212064	0.127818	835308	gene35932	NC_003076.8	21244723	21246774	2052	-	protein_coding	CYP96A4	member of CYP96A
AT5G65480	CCI1	0.616105	0.589367	0.427502	0.48575	0.0805593	0.0740409	0.0800303	0.0589731	836673	gene37591	NC_003076.8	26176021	26177917	1897	+	protein_coding	CCI1	.
AT2G40000	HSPRO2	4.53946	3.66078	0.991112	0.912995	0.0125903	0.0137479	0.915326	0.26274	818588	gene14916	NC_003071.7	16700490	16702336	1847	-	protein_coding	HSPRO2	.
AT2G02540	HB21	4.53819	4.62836	4.17033	10.0854	0.0257468	0.037866	0.304302	0.066315	814784	gene12090	NC_003071.7	683625	685496	1872	+	protein_coding	HB21	Zinc finger homeobox protein. Expressed in vascular tissue. In a yeast one hybrid system was not able to transactivate a reporter gene.
AT1G56680	F25P12.88	0.507457	0.655417	0.380084	0.303188	0.0820493	0.131914	0.0800303	0.0359274	842124	gene6642	NC_003070.9	21250248	21251488	1241	-	protein_coding	F25P12.88	.
AT3G26460	AT3G26460	6.55478	5.26801	4.32938	6.74495	0.0154794	0.0267124	0.0801757	0.0396554	822251	gene19417	NC_003074.8	9683682	9684657	976	-	protein_coding	.	.
AT4G33905	AT4G33905	5.02675	5.86937	9.07064	8.06525	0.0106072	0.0436311	0.0801757	0.0431343	829534	gene28668	NC_003075.7	16253752	16255760	2009	-	protein_coding	.	.
AT5G19530	ACL5	0.327336	0.483815	0.269272	0.478612	0.0142785	0.0215484	0.0803987	0.0335469	832073	gene31745	NC_003076.8	6588771	6591363	2593	-	protein_coding	ACL5	Encodes a spermine synthase. Required for internode elongation and vascular development, specifically in the mechanism that defines the boundaries between veins and nonvein regions. This mechanism may be mediated by polar auxin transport. Though ACL5 has been shown to function as a spermine synthase in E. coli, an ACL5 knockout has no effect on the endogenous levels of free and conjugated polyami…
AT4G06175	AT4G06175	4.5219	3.35048	0.645362	0.95456	0.451468	0.198751	0.748377	1	28719746	gene25967	NC_003075.7	8123399	8123615	217	+	lncRNA	.	Natural antisense transcript overlaps with AT4G14090
AT1G28010	ABCB14	4.51857	4.38708	1.5321	1.28916	0.00734436	0.0313197	0.446225	0.113354	839694	gene3456	NC_003070.9	9763211	9768113	4903	+	protein_coding	ABCB14	Encodes an ATP-binding cassette (ABC) transporter. Expressed in the vascular tissue of primary stem.
AT2G18150	F8D23.7	2.19186	1.41485	2.94309	1.82566	0.0462263	0.209343	0.0805297	0.0812292	816328	gene12042	NC_003071.7	7892034	7893709	1676	-	protein_coding	F8D23.7	.
AT3G17800	AT3G17800	4.50138	4.79751	0.776644	0.936496	0.0125218	0.0191386	0.0832067	0.472134	821048	gene18216	NC_003074.8	6091110	6093151	2042	-	protein_coding	.	mRNA level of the MEB5.2 gene (At3g17800) remains unchanged after cutting the inflorescence stem
AT3G61190	BAP1	4.49658	3.82807	1.2282	0.798469	0.0146729	0.0400021	0.520958	0.143801	825291	gene23332	NC_003074.8	22650159	22651636	1478	-	protein_coding	BAP1	Encodes a protein with a C2 domain that binds to BON1 in yeast two hybrid analyses. Its ability to bind to phospholipids is enhanced by calcium ions. Involved in maintaining cell homeostasis.
AT1G63010	F16P17.18	1.96863	1.65142	2.29156	2.89645	0.0182965	0.0195162	0.0807037	0.0233633	842604	gene7370	NC_003070.9	23347561	23352831	5271	-	protein_coding	F16P17.18	.
AT3G51895	SULTR3%3B1	4.47196	4.18984	6.63281	9.34986	0.0125218	0.0260944	0.0893923	0.0174508	824353	gene22128	NC_003074.8	19251287	19255922	4636	-	protein_coding	SULTR3;1	Encodes a chloroplast-localized sulfate transporter.
AT1G12090	ELP	0.33524	0.347367	0.297123	0.335382	0.0308403	0.0368434	0.0808728	0.0281507	837761	gene1477	NC_003070.9	4089664	4090857	1194	-	protein_coding	ELP	extensin-like protein (ELP)
AT1G09070	SRC2	4.4684	5.5412	1.1942	0.797012	0.0146118	0.0207335	0.527166	0.120266	837428	gene1065	NC_003070.9	2927502	2929107	1606	+	protein_coding	SRC2	SRC2 specifically binds the peptide PIEPPPHH, and moves from ER to a vacuole fraction where it gets internalized. Involved in Protein Storage Vacuole targeting.
AT1G28190	F3H9.15	5.15659	5.22091	3.40289	3.41893	0.0338008	0.0137479	0.0811468	0.0420158	839713	gene3480	NC_003070.9	9846747	9848015	1269	-	protein_coding	F3H9.15	.
AT5G20670	T1M15.70	4.46084	3.19613	0.832095	1.07229	0.0358132	0.0511196	0.191517	0.770453	832190	gene31881	NC_003076.8	6993084	6993948	865	-	protein_coding	T1M15.70	.
AT3G07365	AT3G07365	4.45629	1.09662	1.15829	5.63681	0.0358481	0.619628	0.734616	0.0700855	28718991	gene21362	NC_003074.8	16984335	16984787	453	+	lncRNA	.	Natural antisense transcript overlaps with AT3G46230
AT2G32190	F22D22.6	3.48962	3.72983	3.62244	1.88238	0.0383248	0.0424452	0.0811468	0.0391488	817778	gene13888	NC_003071.7	13674255	13675356	1102	+	protein_coding	F22D22.6	.
AT1G77680	AtRRP44B	4.44824	4.50599	1.74969	2.19171	0.0141458	0.0201774	0.069731	0.0374183	844104	gene9275	NC_003070.9	29191720	29196290	4571	-	protein_coding	AtRRP44B	.
AT5G57010	MHM17.13	4.4471	4.53046	1.96353	1.08361	0.0310045	0.0137674	0.182628	0.265448	835803	gene36539	NC_003076.8	23067828	23070431	2604	+	protein_coding	MHM17.13	.
AT5G00395	AT5G00395	4.44135	3.49656	0.835575	1.39306	0.210978	0.161269	1	0.451369	28720233	gene31136	NC_003076.8	4800308	4800731	424	-	misc_RNA	.	.
AT5G54740	SESA5	4.43814	0.54612	1.0309	1.0286	0.0206965	0.150532	0.734616	0.686581	835563	gene36247	NC_003076.8	22238358	22239187	830	-	protein_coding	SESA5	.
AT1G11960	F12F1.17	4.43785	6.24167	0.9616	0.649274	0.0185478	0.0215484	0.439379	0.0478056	837748	gene1460	NC_003070.9	4039566	4044046	4481	-	protein_coding	F12F1.17	.
AT3G03535	AT3G03535	4.43499	4.80828	0.777454	0.903487	0.00987685	0.0418726	0.267344	0.661204	28718670	gene18217	NC_003074.8	6091592	6092188	597	+	lncRNA	.	Natural antisense transcript overlaps with AT3G17800
AT5G27247	AT5G27247	4.42363	2.78809	1.00109	1.0003	0.658936	0.67153	0.734616	0.686581	6241220	gene32644	NC_003076.8	9601443	9601589	147	-	protein_coding	.	This gene encodes a small protein and has either evidence of transcription or purifying selection.
AT3G52310	ABCG27	4.41861	3.37401	0.976502	0.966055	0.0180268	0.0742238	1	0.663957	824396	gene22184	NC_003074.8	19399188	19402981	3794	+	protein_coding	ABCG27	.
AT5G17490	RGL3	4.41061	4.17542	2.55592	3.03514	0.0125218	0.0137479	0.0808728	0.060998	831615	gene31473	NC_003076.8	5763989	5766246	2258	-	protein_coding	RGL3	DELLA subfamily member involved in GA signal transduction
AT1G05575	AT1G05575	4.40153	4.3071	1.09762	0.688713	0.0254808	0.0216611	0.795213	0.0562027	837061	gene609	NC_003070.9	1661550	1662259	710	-	protein_coding	.	.
AT5G56330	ACA8	1.64337	1.56228	2.14436	1.98805	0.0428117	0.0449511	0.0811468	0.0174508	835733	gene36551	NC_003076.8	22813750	22816256	2507	+	protein_coding	ACA8	.
AT3G05360	RLP30	4.39142	2.8958	1.43964	1.42	0.0360578	0.0373115	0.0954706	0.179992	819700	gene16586	NC_003074.8	1530668	1533361	2694	-	protein_coding	RLP30	.
AT1G13990	F7A19.8	4.39055	4.98727	1.65745	2.24791	0.0221941	0.0487624	0.0800251	0.134027	837959	gene1722	NC_003070.9	4794664	4796599	1936	+	protein_coding	F7A19.8	.
AT3G26510	AT3G26510	0.462216	0.684505	0.391415	0.608225	0.0486572	0.111644	0.0815394	0.039584	822258	gene19426	NC_003074.8	9710326	9712900	2575	-	protein_coding	.	.
AT1G51680	4CL1	1.68253	1.93594	2.87429	2.71154	0.0130501	0.0170309	0.0818668	0.0269458	841593	gene5952	NC_003070.9	19158746	19161737	2992	-	protein_coding	4CL1	encodes an isoform of 4-coumarate:CoA ligase (4CL), which is involved in the last step of the general phenylpropanoid pathway. In addition to 4-coumarate, it also converts ferulate. The catalytic efficiency was in the following (descending) order: p-coumaric acid, ferulic acid, caffeic acid and 5-OH-ferulic acid. At4CL1 was unable to use sinapic acid as substrate.
AT5G61890	K22G18.1	4.38335	5.0757	6.10014	2.43345	0.0188775	0.0449582	0.124905	0.141647	836310	gene37142	NC_003076.8	24852322	24853941	1620	-	protein_coding	K22G18.1	encodes a member of the ERF (ethylene response factor) subfamily B-4 of ERF/AP2 transcription factor family. The protein contains one AP2 domain. There are 7 members in this subfamily.
AT4G30350	F17I23.310	4.37819	3.55705	1.13387	1.05053	0.0101368	0.0200334	0.4232	0.345342	829158	gene28211	NC_003075.7	14847583	14851248	3666	+	protein_coding	F17I23.310	Encodes a member of an eight-gene family (SMAX1 and SMAX1-like) that has weak similarity to AtHSP101, a ClpB chaperonin required for thermotolerance.
AT5G42650	AOS	2.98361	4.79246	2.25395	1.16783	0.0146729	0.0137674	0.0818729	0.0764503	834273	gene34631	NC_003076.8	17097564	17099595	2032	-	protein_coding	AOS	Encodes a member of the cytochrome p450 CYP74 gene family that functions as an allene oxide synthase. This enzyme catalyzes dehydration of the hydroperoxide to an unstable allene oxide in the JA biosynthetic pathway. It shows a dual catalytic activity, the major one being a 13-AOS but also expressing a 9-AOS activity.
AT1G15430	F9L1.39	5.62979	3.44298	2.1099	1.97965	0.0150602	0.0281802	0.0818902	0.0632652	838114	gene1913	NC_003070.9	5304098	5306087	1990	+	protein_coding	F9L1.39	.
AT5G45950	K15I22.15	4.37352	3.64147	2.84025	3.56904	0.0139705	0.0294375	0.0909404	0.0681984	834635	gene35093	NC_003076.8	18634041	18636720	2680	+	protein_coding	K15I22.15	.
AT3G44190	AT3G44190	4.3687	3.46902	1.50258	0.773719	0.0114202	0.0173052	0.264215	0.107224	823541	gene21034	NC_003074.8	15901714	15903628	1915	-	protein_coding	.	.
AT2G31940	F20M17.26	4.36007	6.1396	2.55242	3.9796	0.0386192	0.0678055	0.210999	0.0348951	817752	gene13856	NC_003071.7	13580371	13581134	764	+	protein_coding	F20M17.26	.
AT5G06530	ABCG22	4.34979	4.83813	3.85803	6.89303	0.015924	0.0231998	0.0948187	0.0412392	830541	gene30190	NC_003076.8	1989650	1994961	5312	-	protein_coding	ABCG22	Encodes ABCG22, an ABC transporter gene. Mutation results in increased water transpiration and drought susceptibility.
AT1G79270	ECT8	4.7552	4.75074	2.09339	2.06921	0.01107	0.012701	0.0818902	0.0222497	844267	gene9484	NC_003070.9	29815470	29819678	4209	+	protein_coding	ECT8	.
AT3G59370	AT3G59370	0.337854	0.477836	0.271003	0.206991	0.0175851	0.05535	0.0818902	0.0310399	825106	gene23082	NC_003074.8	21941765	21942571	807	-	protein_coding	.	.
AT1G01480	ACS2	8.19458	5.35486	12.8629	8.07611	0.0180268	0.0137479	0.0820424	0.0291435	837082	gene63	NC_003070.9	175706	178406	2701	+	protein_coding	ACS2	a member of the 1-aminocyclopropane-1-carboxylate (ACC) synthase (S-adenosyl-L-methionine methylthioadenosine-lyase, EC 4.4.1.14) gene family, isolated from a flower-specific cDNA library.
AT4G01070	GT72B1	4.32548	3.04766	1.1177	1.57619	0.0274637	0.0285462	0.838367	0.0647332	827912	gene23805	NC_003075.7	461513	463556	2044	-	protein_coding	GT72B1	the glycosyltransferase (UGT72B1) is involved in metabolizing xenobiotica (chloroaniline and chlorophenole). Comparison between wild type and knock-out mutant demonstrates the central role of this gene for metabolizing chloroaniline but significantly less for chlorophenole. The glucosyltransferase preferred UDP-xylose over UDP-glucose indicating its (additional) functioning as a xylosyltransferas…
AT5G53970	TAT7	5.1264	3.87977	2.6567	3.3686	0.0158185	0.0155084	0.0820424	0.0537674	835480	gene36138	NC_003076.8	21910471	21912809	2339	+	protein_coding	TAT7	encodes tyrosine aminotransferase which is strongly induced upon aging and coronatine treatment
AT3G46110	AT3G46110	4.3126	3.4087	1.99214	1.53287	0.0436415	0.0168402	0.106754	0.124991	823754	gene21343	NC_003074.8	16931991	16933909	1919	+	protein_coding	.	.
AT1G49000	F27J15.21	4.2947	6.79239	0.52266	0.631497	0.0166184	0.0234653	0.341804	0.196903	841322	gene5615	NC_003070.9	18123071	18124289	1219	-	protein_coding	F27J15.21	.
AT4G21500	F18E5.120	4.2942	2.87549	1.49029	1.3654	0.0603234	0.0137747	0.0530826	0.281878	828235	gene27036	NC_003075.7	11440878	11441903	1026	-	protein_coding	F18E5.120	.
AT5G67300	MYBR1	4.2925	5.43099	1.44488	1.03358	0.015304	0.0309028	0.116504	0.686581	836865	gene37848	NC_003076.8	26854022	26856006	1985	+	protein_coding	MYBR1	Member of the R2R3 factor MYB gene family involved in mediating plant responses to a variety of abiotic stimiuli.
AT3G52450	PUB22	4.28121	4.72619	1.38227	0.966597	0.0139705	0.013877	0.297708	0.323576	824410	gene22199	NC_003074.8	19440617	19442427	1811	-	protein_coding	PUB22	Encodes a cytoplasmically localized U-box domain E3 ubiquitin ligase protein that is involved in the response to water stress and acts as a negative regulator of PAMP-triggered immunity.
AT4G21920	F1N20.1	4.27992	5.22028	5.0964	3.02904	0.0186474	0.184058	0.142999	0.174807	828281	gene27093	NC_003075.7	11635877	11636720	844	-	protein_coding	F1N20.1	.
AT4G39675	AT4G39675	0.771578	1.07335	0.304685	0.554956	0.174087	0.745713	0.0820903	0.0645466	830122	gene29409	NC_003075.7	18413775	18414240	466	+	protein_coding	.	.
AT1G19970	T20H2.24	4.27762	3.83187	2.34598	2.39474	0.0295167	0.0337858	0.207347	0.0746792	838586	gene2490	NC_003070.9	6931012	6932826	1815	-	protein_coding	T20H2.24	.
AT5G13170	SAG29	4.27585	4.70983	2.58677	4.9983	0.0180656	0.0203472	0.25224	0.0533748	831156	gene30921	NC_003076.8	4181042	4183354	2313	-	protein_coding	SAG29	Encodes a member of the SWEET sucrose efflux transporter family proteins.
AT1G71697	CK1	4.2707	5.38056	1.72193	1.41237	0.0215322	0.0164941	0.15805	0.029492	843500	gene8511	NC_003070.9	26970968	26973464	2497	+	protein_coding	CK1	Encodes choline kinase. mRNA levels are increased in response to wounding.
AT1G66280	BGLU22	5.14725	4.45405	3.43155	3.41703	0.0096155	0.0137479	0.0827759	0.0303974	842945	gene7804	NC_003070.9	24706512	24709996	3485	-	protein_coding	BGLU22	.
AT4G23570	SGT1A	2.77033	2.09776	0.316192	0.348991	0.0185657	0.0305851	0.0827759	0.04701	828457	gene27321	NC_003075.7	12299749	12302935	3187	+	protein_coding	SGT1A	Closely related to SGT1B, may function in SCF(TIR1) mediated protein degradation. AtSGT1a and AtSGT1b are functionally redundant in the resistance to pathogenes. AtSGT1b was more highly expressed than AtSGT1. The N-terminal TPR domain of AtSGT1a reduces the steady-state level of Arabidopsis SGT1 proteins whereas the same domain from AtSGT1b enhances SGT1 accumulation. The TPR domain is dispensabl…
AT3G04985	AT3G04985	4.26524	0.999028	1.00073	1.0002	0.658936	0.453877	0.734616	0.686581	28718801	gene19369	NC_003074.8	9550929	9551074	146	+	snoRNA	.	snoR137
AT3G07705	AT3G07705	4.25859	4.35025	1.00221	1.02089	0.11497	0.0735175	1	1	28719019	gene21525	NC_003074.8	17427973	17428237	265	-	lncRNA	.	Natural antisense transcript overlaps with AT3G47295
AT4G37160	sks15	0.60258	0.689706	0.334541	0.337898	0.0217003	0.0467027	0.0827759	0.033498	829870	gene29090	NC_003075.7	17494512	17497276	2765	-	protein_coding	sks15	.
AT5G46890	MQD22.2	0.339452	0.413763	0.137166	0.152248	0.0622775	0.0746083	0.0827759	0.040431	834734	gene35218	NC_003076.8	19036296	19036938	643	-	protein_coding	MQD22.2	.
AT5G45630	MRA19.3	4.25169	13.3501	2.28163	2.35363	0.0202786	0.0140011	0.0756393	0.0738698	834603	gene35054	NC_003076.8	18505536	18506382	847	-	protein_coding	MRA19.3	.
AT5G13200	T19L5.4	11.1326	13.0193	2.64859	2.32479	0.0112615	0.0149349	0.0828687	0.0291435	831159	gene30931	NC_003076.8	4206738	4208289	1552	+	protein_coding	T19L5.4	.
AT1G01010	NAC001	4.24286	4.76993	1.96164	1.50314	0.013115	0.0202948	0.0855502	0.108105	839580	gene0	NC_003070.9	3631	5899	2269	+	protein_coding	NAC001	.
AT2G38530	LTP2	1.50396	1.48831	2.83334	4.06197	0.0469771	0.0734296	0.0828687	0.0240971	818435	gene14724	NC_003071.7	16128176	16129399	1224	+	protein_coding	LTP2	Involved in lipid transfer between membranes. Belongs to a family of Lipid transfer proteins. Sequence similarity to other plant/Arabidopsis LPT genes but highest similarity to LPT1. Stress and pathogen-inducible motifs found in the upstream region. Expressed in flower, leaves and siliques but absent in roots. Predicted to be a member of PR-14 pathogenesis-related protein family with the followin…
AT4G04830	MSRB5	0.608683	0.550633	0.484326	0.651229	0.118899	0.102422	0.0832067	0.0268778	825820	gene24429	NC_003075.7	2445775	2447086	1312	+	protein_coding	MSRB5	.
AT2G16630	T24I21.4	4.23137	4.15917	3.13898	2.54568	0.0206514	0.0277008	0.0743239	0.119173	816164	gene11839	NC_003071.7	7209108	7211134	2027	+	protein_coding	T24I21.4	.
AT4G14400	ACD6	4.22576	3.74623	0.981522	0.963683	0.0274573	0.0331117	0.734616	0.210559	827085	gene26022	NC_003075.7	8294165	8299195	5031	+	protein_coding	ACD6	encodes a novel protein with putative ankyrin and transmembrane regions. It is a member of one of the largest uncharacterized gene families in higher plants. The gene is involved in resistance to Pseudomonas syringae.
AT1G09932	AT1G09932	4.22575	5.59882	1.32396	0.565088	0.0203118	0.0194405	0.129409	0.111801	837526	gene1179	NC_003070.9	3230450	3233259	2810	-	protein_coding	.	.
AT4G23220	CRK14	4.21981	8.11488	1.07172	1.00592	0.0533244	0.0484896	0.734616	1	828421	gene27271	NC_003075.7	12154091	12156881	2791	-	protein_coding	CRK14	Encodes a cysteine-rich receptor-like protein kinase.
AT4G12720	NUDT7	4.21762	5.2202	0.781092	0.368154	0.019647	0.020138	0.33677	0.0308561	826884	gene25742	NC_003075.7	7487225	7490127	2903	+	protein_coding	NUDT7	Encodes a protein with ADP-ribose hydrolase activity. Negatively regulates EDS1-conditioned plant defense and programmed cell death.
AT2G40080	ELF4	0.828657	0.750308	4.99817	4.68162	0.0815963	0.105882	0.0832416	0.0908391	818596	gene14926	NC_003071.7	16734294	16734953	660	-	protein_coding	ELF4	Encodes a novel nuclear 111 amino-acid phytochrome-regulated component of a negative feedback loop involving the circadian clock central oscillator components CCA1 and LHY. ELF4 is necessary for light-induced expression of both CCA1 and LHY, and conversely, CCA1 and LHY act negatively on light-induced ELF4 expression. ELF4 promotes clock accuracy and is required for sustained rhythms in the absen…
AT4G22590	TPPG	4.20474	5.64806	1.07908	0.754406	0.0159217	0.0247098	0.854986	0.102485	828355	gene27194	NC_003075.7	11893499	11896480	2982	-	protein_coding	TPPG	.
AT3G49570	LSU3	2.43678	1.6493	4.06567	3.70359	0.0964493	0.222708	0.0834764	0.105179	824119	gene21832	NC_003074.8	18372404	18373147	744	-	protein_coding	LSU3	.
AT3G43670	AT3G43670	0.550857	0.647659	0.348499	0.397784	0.0330464	0.0587891	0.0834764	0.0268778	823469	gene20942	NC_003074.8	15567067	15569984	2918	+	protein_coding	.	.
AT1G30730	T5I8.18	4.18862	5.46423	1.87683	0.966506	0.0116702	0.0161929	0.108775	0.309769	839953	gene3824	NC_003070.9	10900681	10902626	1946	+	protein_coding	T5I8.18	.
AT1G07160	F10K1.13	4.18134	6.1978	1.96619	1.8935	0.0399043	0.013153	0.0660732	0.029492	837227	gene823	NC_003070.9	2197854	2199773	1920	-	protein_coding	F10K1.13	.
AT5G16590	Leucine rich repeat protein 1	0.353218	0.356192	0.363026	0.361593	0.0228428	0.0140741	0.0836496	0.0255367	831521	gene31363	NC_003076.8	5431584	5434186	2603	+	protein_coding	Leucine rich repeat protein 1	.
AT4G04955	ALN	0.312157	0.304379	0.473146	0.465515	0.0247212	0.0301488	0.0836496	0.0787847	825836	gene24448	NC_003075.7	2522034	2525352	3319	-	protein_coding	ALN	Encodes an allantoinase which is involved in allantoin degradation and assimilation. Gene expression was induced when allantoin was added to the medium. The insertion mutant, ataln m2-1, did not grow well on the MS medium where allantoin, instead of ammonium nitrate, was supplied.
AT1G69610	F24J1.24	4.17275	3.52289	1.59812	2.03815	0.0312029	0.013153	0.199162	0.206862	843297	gene8252	NC_003070.9	26186713	26189568	2856	+	protein_coding	F24J1.24	.
AT2G33790	AGP30	1.42165	1.46156	0.351814	0.742315	0.0479307	0.0580109	0.0840291	0.0942572	817946	gene14099	NC_003071.7	14293561	14295353	1793	-	protein_coding	AGP30	pollen Ole e 1 allergen protein containing 14.6% proline residues, similar to arabinogalactan protein (Daucus carota) GI:11322245, SP:Q03211 Pistil-specific extensin-like protein precursor (PELP) {Nicotiana tabacum}; contains Pfam profile PF01190: Pollen proteins Ole e I family
AT1G13740	AFP2	4.16214	3.96515	3.26502	4.00455	0.0294162	0.0137479	0.142505	0.0445631	837934	gene1692	NC_003070.9	4713433	4715407	1975	+	protein_coding	AFP2	Encodes a member of a small plant-specific gene family whose members interact with ABI5 and appear to be involved in mediating stress responses. AFP2 mutants affect a number of ABA mediated processes such as germination and response to osmotic and sugar stress. AFP2 nuclear localization is stress dependent.
AT4G27530	T29A15.20	4.16132	3.31577	3.28127	6.06708	0.0586608	0.11597	0.0530826	0.136538	828862	gene27849	NC_003075.7	13752633	13753257	625	+	protein_coding	T29A15.20	.
AT2G02710	PLPB	4.15537	2.33524	1.29026	2.19181	0.0196875	0.0221535	0.208636	0.0721414	814800	gene9940	NC_003071.7	758693	761064	2372	-	protein_coding	PLPB	Encodes a putative blue light receptor protein.
AT1G76180	ERD14	4.15091	4.89389	1.79736	2.04394	0.0129191	0.012217	0.150255	0.0263564	843950	gene9077	NC_003070.9	28586663	28587931	1269	-	protein_coding	ERD14	Encodes a dehydrin protein whose expression is induced early on in response to dehydration stress. This gene's expression to cold occurs in two waves, with early induction occurring within 1 h and secondary induction occurring 5 h after the beginning of cold stress. Expression is also induced in response to ABA but not in response to 2,4-D, BA, and GA3. ERD14 protein is capable of binding Ca2+, e…
AT3G05490	RALFL22	0.433694	0.674428	0.484099	0.319345	0.0216392	0.0377609	0.0840291	0.0342996	28718845	gene16605	NC_003074.8	1591115	1593047	1933	+	protein_coding	RALFL22	Member of a diversely expressed predicted peptide family showing sequence similarity to tobacco Rapid Alkalinization Factor (RALF), and is believed to play an essential role in the physiology of Arabidopsis. Consists of a single exon and is characterized by a conserved C-terminal motif and N-terminal signal peptide.
AT5G03490	F12E4.260	4.14413	2.76513	1.89545	1.90339	0.0206023	0.0876187	0.117554	0.0433349	831823	gene29805	NC_003076.8	871204	873072	1869	+	protein_coding	F12E4.260	.
AT4G38580	FP6	1.9169	1.98241	2.25851	2.13973	0.0443412	0.0198275	0.0843133	0.0798149	830015	gene29276	NC_003075.7	18034131	18035922	1792	+	protein_coding	FP6	putative farnesylated protein (At4g38580) mRNA, complete
AT4G17230	SCL13	4.14131	4.90775	1.11473	0.866822	0.0104604	0.0160626	0.371092	0.143104	827435	gene26455	NC_003075.7	9660593	9663809	3217	-	protein_coding	SCL13	Encodes a scarecrow-like protein (SCL13). Member of GRAS gene family.
AT4G08245	AT4G08245	4.1372	5.14342	0.511085	0.377911	0.148666	0.254427	0.734616	0.378691	28719976	gene28157	NC_003075.7	14618389	14619394	1006	+	lncRNA	.	Natural antisense transcript overlaps with AT4G29900
AT1G11545	XTH8	0.230096	0.334284	0.340106	0.302671	0.0215279	0.0275249	0.0843133	0.0268629	837698	gene1389	NC_003070.9	3878495	3880391	1897	-	protein_coding	XTH8	.
AT3G04640	F7O18.12	4.13279	4.01108	1.39009	1.0159	0.0643696	0.0511558	0.223859	1	819622	gene16486	NC_003074.8	1260906	1261683	778	-	protein_coding	F7O18.12	.
AT5G20150	SPX1	0.231084	0.29183	0.31133	0.292607	0.0158778	0.0231537	0.0844514	0.0318815	832137	gene31818	NC_003076.8	6802282	6803655	1374	+	protein_coding	SPX1	Expression is upregulated in the shoot of cax1/cax3 mutant.
AT5G43450	MWF20.16	4.12909	3.04106	1.42391	1.54428	0.0185478	0.0198275	0.515883	0.0695499	834365	gene34751	NC_003076.8	17457124	17458980	1857	-	protein_coding	MWF20.16	encodes a protein whose sequence is similar to ACC oxidase
AT1G67360	F1N21.18	4.128	4.03306	1.77125	1.81807	0.0177438	0.0294375	0.464714	0.0670022	843057	gene7951	NC_003070.9	25236781	25238216	1436	-	protein_coding	F1N21.18	.
AT2G46370	JAR1	4.52881	4.85512	2.23877	2.33243	0.0111769	0.0196235	0.084458	0.0337603	819244	gene15774	NC_003071.7	19033586	19036683	3098	+	protein_coding	JAR1	Encodes a jasmonate-amido synthetase that is a member of the GH3 family of proteins. JAR1 catalyzes the formation of a biologically active jasmonyl-isoleucine (JA-Ile) conjugate. JA-Ile promotes the interaction between JAZ1 and COI1 in the jasmonate signaling pathway. JAR1 localizes to the cytoplasm and is also a phytochrome A signaling component. JAR1 is an auxin-induced gene. Loss of function m…
AT5G13740	ZIF1	2.59853	2.39839	3.38062	4.22324	0.0233005	0.0485848	0.0846144	0.0339641	831219	gene30997	NC_003076.8	4432297	4437148	4852	+	protein_coding	ZIF1	Encodes ZIF1 (ZINC-INDUCED FACILITATOR1), a member of the Major Facilitator Superfamily (MFS) of membrane proteins which are found in all organisms and transport a wide range of small, organic molecules. Involved in a mechanism of Zn sequestration, possibly by transport of a Zn ligand or Zn-ligand complex into vacuoles.
AT2G04400	AT2G04400	2.23378	2.90005	2.70106	2.58091	0.0209269	0.0270256	0.0846144	0.0655436	814980	gene10199	NC_003071.7	1531148	1533737	2590	+	protein_coding	.	.
AT4G02290	GH9B13	0.626646	0.670423	0.414999	0.456834	0.0899227	0.0876408	0.0846144	0.0338773	828080	gene23976	NC_003075.7	1002338	1005305	2968	-	protein_coding	GH9B13	.
AT2G46680	HB-7	9.24247	11.1804	4.71517	10.2665	0.0182965	0.0137479	0.0855034	0.0360821	819280	gene15822	NC_003071.7	19165274	19166967	1694	-	protein_coding	HB-7	encodes a putative transcription factor that contains a homeodomain closely linked to a leucine zipper motif. Transcript is detected in all tissues examined. Is transcriptionally regulated in an ABA-dependent manner and may act in a signal transduction pathway which mediates a drought response.
AT4G35985	AT4G35985	4.09746	4.3223	0.720407	0.346411	0.019647	0.0216914	0.285291	0.0226321	829753	gene28945	NC_003075.7	17031945	17034244	2300	-	protein_coding	.	.
AT5G10230	ANNAT7	1.77723	1.45059	2.10545	1.61952	0.15165	0.157081	0.0855034	0.08588	830887	gene30607	NC_003076.8	3209497	3211483	1987	-	protein_coding	ANNAT7	Encodes a calcium-binding protein annexin (AnnAt7).
AT3G13435	AT3G13435	0.619388	0.729938	0.258228	0.150057	0.0435742	0.0191386	0.0855034	0.0261739	820544	gene17608	NC_003074.8	4375300	4376127	828	+	protein_coding	.	.
AT3G14620	CYP72A8	4.08424	3.39151	0.746173	0.994335	0.0141031	0.0284578	0.285618	1	820690	gene17788	NC_003074.8	4914789	4917176	2388	+	protein_coding	CYP72A8	putative cytochrome P450
AT4G03915	AT4G03915	4.08086	4.19698	0.414713	1.13082	0.711398	0.453877	0.734616	1	28719526	gene23876	NC_003075.7	687715	687867	153	+	snoRNA	.	AtU19-2
AT1G26790	T24P13.17	4.08028	3.84113	1.01651	1.09176	0.0144279	0.0302642	0.734616	0.297916	839220	gene3293	NC_003070.9	9273684	9275193	1510	-	protein_coding	T24P13.17	.
AT2G03760	SOT12	4.0761	3.27089	1.84722	1.50259	0.0153654	0.0339549	0.0660732	0.127292	814903	gene10075	NC_003071.7	1149295	1150663	1369	-	protein_coding	SOT12	Encodes a brassinosteroid sulfotransferase. In vitro experiements show that this enzyme has a preference for 24-epibrassinosteroids, particularly 24-epicathasterone, but does not act on castasterone and brassinolide. It also shows sulfating activity toward flavonoids. It is differentially expressed during development, being more abundant in young seedlings and actively growing cell cultures. Expr…
AT3G59140	ABCC10	4.06215	2.71322	1.31438	1.64322	0.0175851	0.0595596	0.208924	0.080621	825083	gene23056	NC_003074.8	21863348	21869036	5689	-	protein_coding	ABCC10	member of MRP subfamily
AT5G25930	F18A17.4	4.06184	4.31859	1.55108	0.913972	0.0161378	0.0154361	0.115507	0.143092	832662	gene32480	NC_003076.8	9050660	9054143	3484	+	protein_coding	F18A17.4	.
AT4G36900	RAP2.10	4.05806	4.63979	1.98628	1.80088	0.0236814	0.0368781	0.0989016	0.0969283	829843	gene29056	NC_003075.7	17388649	17389862	1214	+	protein_coding	RAP2.10	encodes a member of the DREB subfamily A-5 of ERF/AP2 transcription factor family (RAP2.10). The protein contains one AP2 domain. There are 16 members in this subfamily including RAP2.9 and RAP2.1.
AT3G48460	AT3G48460	4.0577	4.67013	4.78672	4.53522	0.00987685	0.020028	0.110943	0.0400798	824005	gene21691	NC_003074.8	17949416	17951250	1835	+	protein_coding	.	.
AT3G51890	clathrin light chain 3	4.05596	3.97741	1.63903	1.45036	0.0181704	0.0223457	0.178667	0.257031	824352	gene22127	NC_003074.8	19249475	19251112	1638	-	protein_coding	clathrin light chain 3	.
AT5G43350	PHT1%3B1	0.479802	0.414505	0.357277	0.224249	0.0434626	0.0412672	0.0855034	0.034579	834353	gene34735	NC_003076.8	17399769	17402158	2390	-	protein_coding	PHT1;1	Encodes an inorganic phosphate transporter Pht1;1. Mutants display enhanced arsenic accumulation. Members of the Pht1 family of phosphate transporters include: Pht1;1/At5g43350, Pht1;2/At5g43370, Pht1;3/At5g43360, Pht1;4/At2g38940, Pht1;5/At2g32830, Pht1;6/At5g43340, Pht1;7/At3g54700, Pht1;8/At1g20860, Pht1;9/At1g76430 (Plant Journal 2002, 31:341).
AT2G37430	ZAT11	4.05449	4.14126	1.7644	1.15074	0.0128095	0.0170986	0.17506	0.288865	818319	gene14584	NC_003071.7	15706285	15707224	940	+	protein_coding	ZAT11	Encodes a member of the zinc finger family of transcriptional regulators. It is expressed in many root tips, primary roots, cotyledons and hypocotyl. The protein is localized to the nucleus. Overexpression of ZAT11 causes increased root growth and increased sensitivity to nickel ions.
AT3G48240	AT3G48240	4.05412	4.08915	1.19011	1.72559	0.0159163	0.063892	0.550321	0.0688976	823982	gene21660	NC_003074.8	17867131	17868460	1330	+	protein_coding	.	.
AT2G40140	CZF1	4.05399	4.26601	0.947961	0.947785	0.0148645	0.0230042	0.734616	0.651817	818605	gene14938	NC_003071.7	16771997	16774734	2738	+	protein_coding	CZF1	.
AT1G21520	F24J8.16	4.05212	2.31734	8.43448	4.35291	0.0694162	0.0847714	0.0696226	0.0339908	838752	gene2705	NC_003070.9	7534019	7534927	909	-	protein_coding	F24J8.16	.
AT5G01542	AT5G01542	4.05175	5.58856	1.20901	0.730994	0.0146729	0.0174456	0.706042	0.118661	10723022	gene29555	NC_003076.8	211017	213593	2577	+	lncRNA	.	Natural antisense transcript overlaps with AT5G01540~Potential natural antisense gene, locus overlaps with AT5G01540
AT1G01120	KCS1	3.36059	3.19504	2.37255	1.86496	0.0115683	0.0196235	0.0855502	0.0184644	839395	gene16	NC_003070.9	57164	59215	2052	-	protein_coding	KCS1	Encodes a condensing enzyme KCS1 (3-ketoacyl-CoA synthase 1) which is involved in the critical fatty acid elongation process in wax biosynthesis.
AT1G15415	F9L1.37	4.02827	5.66985	2.73084	3.783	0.0527631	0.0284172	0.618673	0.10404	838112	gene1911	NC_003070.9	5300742	5301489	748	-	protein_coding	F9L1.37	The protein encoded by this gene was identified as a part of pollen proteome by mass spec analysis. It has weak homology to LEA (late embryo abundant) proteins. Encodes protein phosphatase 2A (PP2A) B'gamma subunit. Targeted to nucleus and cytosol.
AT1G26560	BGLU40	4.02336	2.92918	1.82613	2.15924	0.0106072	0.0215635	0.267726	0.0869495	839196	gene3262	NC_003070.9	9178212	9181967	3756	+	protein_coding	BGLU40	.
AT1G32870	NAC13	4.02214	3.59921	2.61447	2.48074	0.021265	0.0251945	0.194351	0.0298352	840181	gene4139	NC_003070.9	11911631	11913947	2317	+	protein_coding	NAC13	.
AT1G66580	SAG24	3.19361	2.34169	2.46703	1.97606	0.0243588	0.0501244	0.0855502	0.0822344	842976	gene7842	NC_003070.9	24839090	24840806	1717	+	protein_coding	SAG24	.
AT4G22463	AT4G22463	0.310346	0.411492	0.160541	0.172522	0.113015	0.146269	0.0855605	0.04701	28720167	gene27174	NC_003075.7	11838997	11839571	575	+	protein_coding	.	.
AT5G13080	WRKY75	4.01535	3.61921	1.59733	1.96489	0.021726	0.0230042	0.379257	0.0386411	831147	gene30911	NC_003076.8	4149738	4151201	1464	-	protein_coding	WRKY75	WRKY75 is one of several transcription factors induced during Pi deprivation. It is nuclear localized and regulated differentially during Pi starvation. RNAi mediated suppression of WRKY75 made the plants more susceptible to Pi stress as indicated by the higher accumulation of anthocyanin during Pi starvation.
AT5G00905	AT5G00905	4.01022	6.27567	1.89388	1.80938	0.199744	0.0917054	0.835086	0.384029	28720334	gene29762	NC_003076.8	758519	758719	201	-	lncRNA	.	Natural antisense transcript overlaps with AT5G03190
AT1G75910	EXL4	4.00498	5.20923	1.10287	1.1909	0.0187295	0.0198887	0.244946	0.196085	843924	gene30509	NC_003070.9	28501434	28503283	1850	+	protein_coding	EXL4	member of Lipase proteins
AT1G32860	F9L11.6	2.07245	2.23419	3.16828	2.88359	0.0362924	0.0371425	0.0860179	0.0404869	840180	gene4138	NC_003070.9	11907044	11909049	2006	-	protein_coding	F9L11.6	.
AT2G32800	AP4.3A	3.9984	4.32225	1.94462	1.78601	0.018139	0.0214407	0.363526	0.0253018	817841	gene13970	NC_003071.7	13916440	13919179	2740	+	protein_coding	AP4.3A	.
AT5G46900	MQD22.3	0.284139	0.434068	0.0874737	0.144286	0.0505015	0.081962	0.0861128	0.046356	834735	gene35219	NC_003076.8	19039701	19040456	756	-	protein_coding	MQD22.3	.
AT1G24145	AT1G24145	3.99247	9.31929	0.871405	0.856088	0.0644232	0.02009	0.496555	0.663957	839027	gene3033	NC_003070.9	8540838	8542053	1216	+	protein_coding	.	.
AT3G00330	AT3G00330	3.98841	4.87618	0.559485	0.294655	0.017187	0.061265	0.47936	0.214367	28718381	gene17857	NC_003074.8	5123281	5123841	561	+	misc_RNA	.	.
AT4G12005	AT4G12005	3.98638	3.91019	3.09187	3.59662	0.036735	0.0301977	0.1827	0.0238994	826808	gene25646	NC_003075.7	7196364	7197226	863	+	protein_coding	.	.
AT2G04570	T1O3.2	3.98582	5.14771	2.63402	2.32855	0.0159064	0.0145793	0.111694	0.0339557	814999	gene10220	NC_003071.7	1594588	1596372	1785	+	protein_coding	T1O3.2	.
AT5G44120	CRA1	3.97638	1.15267	4.86658	1.16848	0.0405722	0.504094	0.166734	0.156201	834435	gene34837	NC_003076.8	17756238	17758336	2099	-	protein_coding	CRA1	Encodes a 12S seed storage protein. The Landsberg erecta genome contains another copy of 12S globulin gene, CRA2, which is located tandemly with CRA1. Protein is tyrosine-phosphorylated and its phosphorylation state is modulated in response to ABA in Arabidopsis thaliana seeds.
AT1G54540	F20D21.35	2.31017	2.31945	3.15543	2.70974	0.0655353	0.041771	0.0865084	0.0400209	841896	gene6347	NC_003070.9	20367553	20368511	959	-	protein_coding	F20D21.35	.
AT3G10820	AT3G10820	2.21392	2.19582	2.53012	3.10692	0.0186683	0.0244347	0.0865084	0.0346718	820251	gene17256	NC_003074.8	3387078	3391003	3926	+	protein_coding	.	.
AT4G27150	SESA2	3.96953	0.980934	1.76092	1.00361	0.032725	1	0.694281	0.305051	828823	gene27800	NC_003075.7	13609341	13610075	735	+	protein_coding	SESA2	.
AT5G25450	F18G18.190	3.9682	2.83459	1.006	1.74603	0.0180268	0.0337449	1	0.0797085	832619	gene32416	NC_003076.8	8856917	8858476	1560	+	protein_coding	F18G18.190	.
AT3G28580	AT3G28580	3.96436	3.19545	1.71781	0.799245	0.0250597	0.0335538	0.272097	0.32896	822488	gene19745	NC_003074.8	10715597	10717393	1797	+	protein_coding	.	.
AT1G04897	U4.6	3.96312	0.998049	1.00147	5.6934	0.658936	0.453885	0.734616	0.686581	28716203	gene1444	NC_003070.9	4006868	4007020	153	-	snRNA	U4.6	.
AT4G14746	AT4G14746	3.95881	3.96792	1.86911	1.94725	0.0194467	0.0284172	0.158219	0.0468605	827129	gene26086	NC_003075.7	8462437	8464485	2049	-	protein_coding	.	.
AT3G25760	AOC1	3.95571	9.3348	5.2578	3.72813	0.0104419	0.00287957	0.149958	0.0501787	822167	gene19321	NC_003074.8	9403779	9405338	1560	+	protein_coding	AOC1	encodes allene oxide cyclase. One of four genes in Arabidopsis that encode this enzyme, which catalyzes an essential step in jasmonic acid biosynthesis. Gene expression is induced during senescence, a process that involves jasmonic acid signalling pathway.
AT1G74560	NRP1	0.596217	0.684274	0.46634	0.573285	0.0138344	0.0447127	0.0865084	0.0688482	843797	gene10032	NC_003070.9	28017584	28020059	2476	-	protein_coding	NRP1	Double nrp1-1 nrp2-1 mutants show arrest of cell cycle progression at G2/M and disordered cellular organization occurred in root tips. Localize in the nucleus and can form homomeric and heteromeric protein complexes with NRP2. Bind histones Histone2A and Histone2B and associate with chromatin in vivo.
AT3G55580	F1I16.1	3.95215	2.81153	1.05481	1.25373	0.0259239	0.0309394	1	0.508364	824723	gene22603	NC_003074.8	20612693	20615932	3240	+	protein_coding	F1I16.1	.
AT3G21750	UGT71B1	3.95147	3.50001	1.88465	2.35107	0.0142785	0.0201664	0.102483	0.0251739	821729	gene18745	NC_003074.8	7664345	7666305	1961	+	protein_coding	UGT71B1	Encodes a glucosyltransferase that can attach glucose to a number of hydroxylated phenolic compounds as well as quercetins in vitro
AT1G75780	TUB1	0.503443	0.711707	0.365605	0.440473	0.0316288	0.0990446	0.0865084	0.0288412	843911	gene9024	NC_003070.9	28451138	28453820	2683	-	protein_coding	TUB1	beta tubulin gene downregulated by phytochrome A (phyA)-mediated far-red light high-irradiance and the phytochrome B (phyB)-mediated red light high-irradiance responses
AT1G10370	ERD9	19.155	21.4979	26.4335	28.1162	0.00773773	0.0155084	0.086638	0.0403342	837576	gene1231	NC_003070.9	3396883	3398358	1476	-	protein_coding	ERD9	Encodes GSTU17 (Glutathione S-Transferase U17). Functions as a negative component of stress-mediated signal transduction pathways in drought and salt stress responses.
AT2G04040	DTX1	3.94574	1.98059	1.6021	1.17711	0.0223412	0.0811338	0.140459	0.577187	814938	gene10147	NC_003071.7	1334270	1336550	2281	-	protein_coding	DTX1	AtDTX1 (At2g04040) has been identified as a detoxifying efflux carrier for plant-derived antibiotics and other toxic compounds, including CD2+. Mistakenly referred to as At2g04070 in PMID:11739388.
AT1G72140	T9N14.16	4.01686	3.44472	7.77348	5.86927	0.020889	0.0181428	0.086638	0.0387482	843545	gene8570	NC_003070.9	27141765	27144490	2726	+	protein_coding	T9N14.16	.
AT5G09855	AT5G09855	3.93939	5.99046	1.56032	1.00732	0.0146358	0.0782825	0.424423	1	28721135	gene37849	NC_003076.8	26854259	26854516	258	-	lncRNA	.	Natural antisense transcript overlaps with AT5G67300
AT5G44350	K9L2.14	3.93798	2.28209	1.61058	1.18855	0.0231893	0.0495834	0.189595	0.0275574	834461	gene34869	NC_003076.8	17864376	17865756	1381	+	protein_coding	K9L2.14	.
AT2G18980	F19F24.18	0.442449	0.434807	0.328547	0.372691	0.0472418	0.0498525	0.0869815	0.0462526	816415	gene12142	NC_003071.7	8233335	8235440	2106	-	protein_coding	F19F24.18	.
AT1G20823	F2D10.34	3.93244	4.41026	0.904836	0.774465	0.0165181	0.0155084	0.808159	0.100791	838674	gene2609	NC_003070.9	7238693	7239698	1006	+	protein_coding	F2D10.34	.
AT1G54740	T22H22.16	0.73478	0.814708	0.408816	0.426632	0.0717378	0.104708	0.0870166	0.0304043	841915	gene6371	NC_003070.9	20430769	20431986	1218	+	protein_coding	T22H22.16	.
AT5G65140	TPPJ	3.91677	4.60589	1.40453	1.41974	0.0290594	0.0209518	0.734616	0.0750562	836638	gene37544	NC_003076.8	26019457	26022380	2924	-	protein_coding	TPPJ	.
AT3G47295	AT3G47295	3.91653	2.52294	2.14771	2.45184	0.0523686	0.076512	0.403105	0.249113	823883	gene21524	NC_003074.8	17427950	17428511	562	+	protein_coding	.	.
AT3G61490	AT3G61490	3.91521	2.57559	0.579937	0.716739	0.01327	0.0247435	0.306186	0.148788	825322	gene23371	NC_003074.8	22757761	22760470	2710	+	protein_coding	.	.
AT2G07875	AT2G07875	3.91031	1.84841	1.26459	1.24342	0.111221	0.453877	1	1	28717855	gene12698	NC_003071.7	9829803	9830074	272	+	lncRNA	.	Natural antisense transcript overlaps with AT2G23090
AT1G73080	PEPR1	3.90561	4.06335	1.57418	0.902693	0.0150623	0.0231998	0.287088	0.298442	843639	gene8683	NC_003070.9	27484240	27488204	3965	+	protein_coding	PEPR1	Encodes a leucine-rich repeat receptor kinase. Functions as a receptor for AtPep1 to amplify innate immunity response to pathogen attacks.
AT3G09440	AT3G09440	3.90344	3.76503	1.19109	1.48533	0.015304	0.012217	0.670783	0.036918	820102	gene17077	NC_003074.8	2902355	2905947	3593	-	protein_coding	.	.
AT2G27080	T20P8.13	3.90224	5.21366	0.829901	0.455055	0.0141589	0.0356528	0.577711	0.0226321	817250	gene13235	NC_003071.7	11563933	11567504	3572	+	protein_coding	T20P8.13	.
AT5G55120	VTC5	3.8958	3.88498	1.83382	1.8249	0.00999249	0.023702	0.275263	0.0870974	835603	gene36291	NC_003076.8	22369007	22371867	2861	+	protein_coding	VTC5	Encodes a GDP-L-galactose phosphorylase, with similar biochemical properties as VTC2.
AT1G20440	COR47	9.37494	9.81719	3.76937	4.20594	0.0190226	0.014649	0.0877303	0.0174508	838632	gene2551	NC_003070.9	7084409	7086873	2465	-	protein_coding	COR47	Belongs to the dehydrin protein family, which contains highly conserved stretches of 7-17 residues that are repetitively scattered in their sequences, the K-, S-, Y- and lysine rich segments. Cold regulated gene, amino acid sequence homology with Group II LEA (late embryogenesis abundant) proteins. Also responds to osmotic stress, ABA, dehydration and inhibits e.coli growth while overexpressed. C…
AT3G59880	AT3G59880	3.89308	4.69173	1.87251	1.21668	0.0104467	0.0417216	0.206053	0.648237	825158	gene23143	NC_003074.8	22120876	22121957	1082	+	protein_coding	.	.
AT5G02535	AT5G02535	3.88901	3.00336	1.86633	1.00032	0.658936	0.300147	0.734616	0.686581	28720478	gene31345	NC_003076.8	5374812	5374999	188	-	antisense_RNA	.	Natural antisense transcript overlaps with AT5G16450
AT3G14990	DJ1A	3.8842	2.94587	1.49497	1.44456	0.0106072	0.0129474	0.125077	0.0342996	820728	gene17830	NC_003074.8	5047376	5049971	2596	+	protein_coding	DJ1A	Encodes a homolog of animal DJ-1 superfamily protein. In the A. thaliana genome, three genes encoding close homologs of human DJ-1 were identified AT3G14990 (DJ1A), AT1G53280 (DJ1B) and AT4G34020 (DJ1C). Among the three homologs, DJ1C is essential for chloroplast development and viability. It exhibits glyoxalase activity towards glyoxal and methylglyoxal.
AT3G51090	AT3G51090	3.88264	3.15933	1.86681	2.13266	0.022018	0.0314116	0.294538	0.0337603	824273	gene22030	NC_003074.8	18977924	18980053	2130	-	protein_coding	.	.
AT4G15660	DL3870W	3.87469	3.34274	0.992391	0.90797	0.0210123	0.0285511	1	0.608321	827243	gene26216	NC_003075.7	8925571	8926510	940	+	protein_coding	DL3870W	.
AT1G68568	AT1G68568	3.86646	3.31478	0.724238	0.674341	0.0256044	0.242654	0.691755	0.304626	5007839	gene8102	NC_003070.9	25746977	25747964	988	-	antisense_RNA	.	Natural antisense transcript overlaps with AT1G68570~Potential natural antisense gene, locus overlaps with AT1G68570
AT4G31380	FLP1	3.85363	3.91699	3.38383	6.28874	0.100329	0.048889	0.205053	0.085223	28720195	gene28348	NC_003075.7	15230008	15230382	375	+	protein_coding	FLP1	encodes a small protein with unknown function and is similar to flower promoting factor 1. This gene is not expressed in apical meristem after floral induction but is expressed in roots, flowers, and in low abundance, leaves.
AT3G62590	AT3G62590	3.85338	4.14248	2.48555	2.93142	0.0106072	0.0137479	0.120466	0.049463	825433	gene23513	NC_003074.8	23147918	23150606	2689	-	protein_coding	.	.
AT2G05540	T20G20.11	3.84137	3.58657	1.9326	5.25394	0.0159217	0.0335905	0.213502	0.115912	815103	gene10354	NC_003071.7	2033154	2034283	1130	+	protein_coding	T20G20.11	.
AT3G09830	AT3G09830	3.83413	5.44482	1.07916	0.604521	0.0158185	0.0203663	0.894223	0.0896809	820141	gene17122	NC_003074.8	3016490	3019103	2614	+	protein_coding	.	.
AT4G37850	T28I19.130	3.83408	2.60569	2.26957	1.72439	0.0236814	0.0736497	0.335044	0.0423846	829941	gene29184	NC_003075.7	17796072	17797901	1830	-	protein_coding	T28I19.130	.
AT5G19240	T24G5.140	3.82619	7.50338	0.674918	0.343818	0.0124198	0.0216914	0.202475	0.0339172	832044	gene31710	NC_003076.8	6470072	6471636	1565	+	protein_coding	T24G5.140	.
AT4G05050	UBQ11	3.81326	4.0539	1.33707	1.2031	0.0158071	0.0169167	0.0860179	0.0338773	825847	gene24467	NC_003075.7	2588004	2589437	1434	-	protein_coding	UBQ11	polyubiquitin gene, belongs to a subtype group with UBQ10 and UBQ14. Various ecotypes of Arabidopsis have different numbers of ubiquitin repeats within this gene.
AT5G24780	VSP1	3.80531	6.0202	1.05769	2.04587	0.089802	0.0444821	0.850283	0.0416212	832547	gene32328	NC_003076.8	8507590	8509201	1612	-	protein_coding	VSP1	encodes an acid phosphatase similar to soybean vegetative storage proteins. Gene expression is induced by wounding and jasmonic acid.
AT4G16000	DL4040C	3.79101	3.93792	1.75394	2.02474	0.0204251	0.0262058	0.338237	0.0508738	827284	gene26265	NC_003075.7	9063759	9064786	1028	-	protein_coding	DL4040C	.
AT3G28345	ABCB15	0.901458	0.758762	0.403507	0.375043	0.338227	0.0706947	0.0877303	0.0339641	822463	gene19715	NC_003074.8	10593690	10599042	5353	-	protein_coding	ABCB15	Encodes an ATP-binding cassette (ABC) transporter. Expressed in the vascular tissue of primary stem.
AT5G39660	CDF2	3.77924	2.62383	1.71656	1.84423	0.0141031	0.0215484	0.409706	0.099854	833962	gene34235	NC_003076.8	15878698	15881537	2840	+	protein_coding	CDF2	Dof-type zinc finger domain-containing protein, identical to H-protein promoter binding factor-2a GI:3386546 from (Arabidopsis thaliana). Interacts with LKP2 and FKF1, but its overexpression does not change flowering time under short or long day conditions.
AT5G14880	KUP8	0.881662	0.887139	0.354957	0.431066	0.0626912	0.0790961	0.0879201	0.0392646	831340	gene31140	NC_003076.8	4813931	4817881	3951	+	protein_coding	KUP8	.
AT5G13490	AAC2	3.77651	3.452	1.22989	1.63053	0.0174719	0.0145645	0.721389	0.0892271	831193	gene30969	NC_003076.8	4335272	4337730	2459	+	protein_coding	AAC2	Encodes mitochondrial ADP/ATP carrier
AT4G12510	T1P17.100	0.215812	0.24435	0.0895966	0.110428	0.0685127	0.0750266	0.0879201	0.0414341	826863	gene25717	NC_003075.7	7417068	7417873	806	-	protein_coding	T1P17.100	.
AT1G57630	T8L23.10	3.76711	6.93324	2.83393	1.18742	0.0933321	0.0846013	0.152535	0.444263	842139	gene6744	NC_003070.9	21345445	21346157	713	+	protein_coding	T8L23.10	.
AT1G68500	T26J14.7	11.4019	9.39628	22.4788	19.0253	0.0533209	0.0147336	0.08822	0.0605937	843179	gene8092	NC_003070.9	25701770	25702778	1009	+	protein_coding	T26J14.7	.
AT1G09970	LRR XI-23	3.76058	3.72392	1.36551	1.26518	0.00922849	0.0123069	0.0763983	0.0226321	837531	gene1185	NC_003070.9	3252098	3255782	3685	+	protein_coding	LRR XI-23	RLK7 belongs to a leucine-rich repeat class of receptor-likekinase (LRR-RLKs). It is involved in the control of germination speed and the tolerance to oxidant stress.
AT5G24530	DMR6	3.74551	3.94682	1.52448	1.76822	0.0141458	0.0191271	0.306655	0.04851	832524	gene32296	NC_003076.8	8378759	8383401	4643	+	protein_coding	DMR6	Encodes a putative 2OG-Fe(II) oxygenase that is defense-associated but required for susceptibility to downy mildew.
AT1G72160	T9N14.8	0.62444	0.720251	0.425102	0.466846	0.0256044	0.0365409	0.0883055	0.0410425	843547	gene8573	NC_003070.9	27153555	27155793	2239	-	protein_coding	T9N14.8	.
AT5G60660	PIP2%3B4	0.538312	0.597291	0.242025	0.241678	0.0838148	0.101255	0.0883201	0.0268778	836187	gene36994	NC_003076.8	24375368	24377206	1839	-	protein_coding	PIP2;4	A member of the plasma membrane intrinsic protein subfamily PIP2.When expressed in yeast cells can conduct hydrogen peroxide into those cells. Mutants exhibit longer root hairs.
AT3G01795	AT3G01795	3.73629	3.38575	0.528221	1.2604	0.192363	0.068359	0.467769	0.596276	28718517	gene16669	NC_003074.8	1755886	1756147	262	+	lncRNA	.	Natural antisense transcript overlaps with AT3G05880
AT4G27652	AT4G27652	3.73563	4.2732	1.03202	0.929797	0.0272927	0.0264614	1	0.248357	828877	gene27867	NC_003075.7	13809779	13810462	684	+	protein_coding	.	.
AT5G46500	K11I1.9	3.73531	2.65022	0.917435	0.907197	0.0317578	0.0399239	0.475487	0.418119	834693	gene35163	NC_003076.8	18855955	18858552	2598	+	protein_coding	K11I1.9	.
AT5G25440	F18G18.180	3.73235	4.13369	1.10794	0.634031	0.0204567	0.0122452	0.371243	0.0782539	832618	gene32415	NC_003076.8	8854507	8856809	2303	-	protein_coding	F18G18.180	.
AT2G38750	ANNAT4	1.83609	1.83023	12.127	7.20864	0.0280232	0.0279281	0.0890091	0.0268778	818457	gene14750	NC_003071.7	16196265	16198832	2568	-	protein_coding	ANNAT4	Annexins are a family of calcium dependent membrane binding proteins though to be involved in Golgi mediated secretion. This is one of four annexins identified in Arabidopsis.
AT1G70140	FH8	3.72748	4.04755	1.76449	1.40455	0.0471071	0.0137479	0.156347	0.0873256	843350	gene8325	NC_003070.9	26412500	26415258	2759	-	protein_coding	FH8	Encodes a group I formin. Binds to F-actin barbed ends. Has severing actin filaments activity. Binds profilin. Involved in the initiation and tip growth of root hairs through regulation of actin cytoskeleton.
AT4G30190	HA2	0.540014	0.680819	0.430504	0.32575	0.0285043	0.0436016	0.0890091	0.0222497	829142	gene28195	NC_003075.7	14770395	14776247	5853	-	protein_coding	HA2	belongs to the P-type ATPase superfamily of cation-transporting ATPases, pumps protons out of the cell, generating a proton gradient that drives the active transport of nutrients by proton symport. has two autoinhibitory regions within the C-terminal dom
AT3G14415	GOX2	0.608653	0.612502	0.289396	0.344857	0.0158481	0.0197439	0.0890196	0.0376861	820664	gene17757	NC_003074.8	4818251	4821013	2763	+	protein_coding	GOX2	Encodes a glycolate oxidase that modulates reactive oxygen species-mediated signal transduction during nonhost resistance.
AT4G33610	T16L1.100	3.7156	3.27805	1.92527	2.53197	0.0141458	0.0424452	0.44001	0.0929309	829501	gene28626	NC_003075.7	16146227	16147073	847	+	protein_coding	T16L1.100	.
AT5G42050	MJC20.15	3.71204	4.29099	1.20249	1.2516	0.0144168	0.0137479	0.734616	0.144567	834210	gene34547	NC_003076.8	16815310	16817346	2037	+	protein_coding	MJC20.15	.
AT5G56980	MHM17.10	5.63337	5.90316	2.5912	2.17317	0.0253453	0.0137479	0.0892739	0.0436049	835800	gene36535	NC_003076.8	23056080	23057742	1663	-	protein_coding	MHM17.10	.
AT3G21090	ABCG15	3.70588	3.15276	1.83794	2.01319	0.0150623	0.0373872	0.0842187	0.0557458	821661	gene18657	NC_003074.8	7391286	7395096	3811	-	protein_coding	ABCG15	.
AT4G14690	ELIP2	3.70499	3.04486	3.12443	3.74807	0.053465	0.0464533	0.167827	0.0345672	827119	gene26063	NC_003075.7	8418242	8419325	1084	+	protein_coding	ELIP2	Encodes an early light-induced protein. ELIPs are thought not to be directly involved in the synthesis and assembly of specific photosynthetic complexes, but rather affect the biogenesis of all chlorophyll-binding complexes. A study (PMID 17553115) has shown that the chlorophyll synthesis pathway was downregulated as a result of constitutive ELIP2 expression, leading to decreased chlorophyll avai…
AT2G38640	T6A23.16	3.06948	4.01329	0.484815	0.764265	0.0211579	0.0196052	0.0892893	0.0659365	818446	gene14736	NC_003071.7	16157521	16158660	1140	-	protein_coding	T6A23.16	.
AT1G10070	BCAT-2	3.69929	4.72444	1.87462	4.35626	0.0230967	0.0207844	0.205367	0.0338353	837543	gene1195	NC_003070.9	3288087	3290471	2385	+	protein_coding	BCAT-2	Encodes a chloroplast branched-chain amino acid aminotransferase. Complements the yeast leu/iso-leu/val auxotrophy mutant. Involved in cell wall development.
AT5G02490	Hsp70-2	3.6979	3.28209	0.927759	0.960323	0.0177438	0.012701	0.942936	0.754643	831856	gene29677	NC_003076.8	550035	552827	2793	-	protein_coding	Hsp70-2	.
AT4G34139	AT4G34139	3.69636	2.16428	0.936045	1.00164	0.0339307	0.0548636	0.959455	1	28720203	gene28707	NC_003075.7	16348104	16349118	1015	+	protein_coding	.	.
AT4G02380	SAG21	3.69367	2.95823	1.06253	1.1164	0.0307428	0.0291647	0.840874	0.191533	828053	gene23991	NC_003075.7	1046042	1047105	1064	-	protein_coding	SAG21	Encodes AtLEA5 (late embryogenesis abundant like protein). Also known as SENESCENCE-ASSOCIATED GENE 21 (SAG21). Has a role on oxidative stress tolerance. mRNA levels are elevated in response to various stresses.
AT1G02820	LEA3	3.69321	3.15594	2.33142	2.28335	0.0173227	0.0383221	0.0892739	0.0402145	839304	gene239	NC_003070.9	623656	624567	912	-	protein_coding	LEA3	.
AT2G23340	DEAR3	3.68637	2.72007	0.853244	0.868431	0.00636735	0.013991	0.63548	0.470016	816866	gene12732	NC_003071.7	9937792	9938997	1206	+	protein_coding	DEAR3	encodes a member of the DREB subfamily A-5 of ERF/AP2 transcription factor family. The protein contains one AP2 domain. There are 16 members in this subfamily including RAP2.1, RAP2.9 and RAP2.10.
AT5G57910	MTI20.17	3.6818	3.26899	1.31166	1.89437	0.0192727	0.0183343	0.230499	0.0404869	835902	gene36653	NC_003076.8	23451066	23452963	1898	-	protein_coding	MTI20.17	.
AT2G26560	PLA2A	3.67582	10.5462	2.52737	2.79999	0.0291676	0.0137479	0.165689	0.12025	817197	gene13168	NC_003071.7	11293702	11295918	2217	-	protein_coding	PLA2A	Encodes a lipid acyl hydrolase with wide substrate specificity that accumulates upon infection by fungal and bacterial pathogens. Protein is localized in the cytoplasm in healthy leaves, and in membranes in infected cells. Plays a role in cell death and differentially affects the accumulation of oxylipins. Contributes to resistance to virus.
AT5G48530	MJE7.17	3.67566	3.56861	1.45656	0.98099	0.0106072	0.0203663	0.429861	1	834909	gene35424	NC_003076.8	19666790	19668830	2041	-	protein_coding	MJE7.17	.
AT3G47340	ASN1	5.19292	4.44409	20.3737	31.0033	0.0141031	0.0163211	0.0893093	0.023578	823888	gene21530	NC_003074.8	17437840	17441431	3592	-	protein_coding	ASN1	encodes a glutamine-dependent asparagine synthetase, the predicted ASN1 peptide contains a purF-type glutamine-binding domain, and is expressed predominantly in shoot tissues, where light has a negative effect on its mRNA accumulation. Expression is induced within 3 hours of dark treatment, in senescing leaves and treatment with exogenous photosynthesis inhibitor. Induction of gene expression was…
AT5G52750	F6N7.24	3.67397	9.00047	1.82312	0.903144	0.0149884	0.0175855	0.0605165	0.48333	835352	gene35983	NC_003076.8	21383979	21385015	1037	+	protein_coding	F6N7.24	.
AT4G06665	AT4G06665	3.64748	4.08418	2.79771	2.02554	0.0141757	0.0237971	0.0893093	0.173541	28719798	gene26440	NC_003075.7	9606803	9607320	518	+	lncRNA	.	Natural antisense transcript overlaps with AT4G17090
AT5G50200	WR3	3.3335	4.02639	3.83411	2.6857	0.0183551	0.0203472	0.0893093	0.0533185	835085	gene35659	NC_003076.8	20436180	20437815	1636	+	protein_coding	WR3	Wound-responsive gene 3 (WR3). Encodes a high-affinity nitrate transporter. Up-regulated by nitrate. Involved in jasmonic acid-independent wound signal transduction.
AT2G22200	T26C19.14	3.66065	6.0354	0.877128	1.13536	0.0664971	0.047319	0.776905	0.686639	816754	gene12574	NC_003071.7	9443073	9444428	1356	-	protein_coding	T26C19.14	encodes a member of the DREB subfamily A-6 of ERF/AP2 transcription factor family. The protein contains one AP2 domain. There are 8 members in this subfamily including RAP2.4.
AT1G60270	BGLU6	3.65581	3.32773	1.47222	1.10804	0.0224952	0.0471981	0.174202	0.254572	3767579	gene6982	NC_003070.9	22221575	22224358	2784	-	protein_coding	BGLU6	.
AT5G43260	MNL12.8	3.65528	3.31299	1.88656	2.35722	0.0251828	0.0191637	0.14719	0.12261	834344	gene34725	NC_003076.8	17357377	17358340	964	-	protein_coding	MNL12.8	.
AT3G53960	AT3G53960	3.65467	4.13924	1.49464	2.22332	0.0216392	0.0215804	0.406734	0.085223	824563	gene22399	NC_003074.8	19978122	19981086	2965	-	protein_coding	.	.
AT4G32190	F10M6.170	2.37386	1.81556	3.03541	2.79283	0.0096155	0.0196235	0.0893093	0.0655046	829352	gene28454	NC_003075.7	15544800	15547857	3058	+	protein_coding	F10M6.170	.
AT4G01360	BPS3	3.64571	4.01105	1.42666	1.34434	0.0689821	0.0215484	0.0757628	0.123862	827971	gene23838	NC_003075.7	564760	566408	1649	+	protein_coding	BPS3	Encodes a protein related to BYPASS1 (BPS1). Regulates production of mobile compound: bps signal.
AT3G50770	CML41	3.64341	5.5033	0.585509	0.68876	0.0515456	0.051401	0.180136	0.0857783	824241	gene21988	NC_003074.8	18873911	18874836	926	+	protein_coding	CML41	.
AT1G22890	F19G10.22	3.64332	3.89848	0.895766	0.803839	0.0311028	0.0593854	0.936848	0.508366	838896	gene2878	NC_003070.9	8102728	8103588	861	+	protein_coding	F19G10.22	.
AT3G13790	ATBFRUCT1	3.63561	3.56713	1.72172	1.19958	0.01107	0.0141211	0.0879201	0.048839	820591	gene17664	NC_003074.8	4532762	4535914	3153	-	protein_coding	ATBFRUCT1	Encodes a protein with invertase activity.
AT5G37500	GORK	1.69587	1.78771	2.06478	2.56284	0.104887	0.0950904	0.0893093	0.0630358	833728	gene33923	NC_003076.8	14889245	14895233	5989	-	protein_coding	GORK	Encodes a guard cell outward potassium channel. Belongs to the Shaker family K+ channel. This family includes five groups based on phylogenetic analysis (FEBS Letters (2007) 581: 2357): I (inward rectifying channel): AKT1 (AT2G26650), AKT5 (AT4G32500) and SPIK (also known as AKT6, AT2G25600); II (inward rectifying channel): KAT1 (AT5G46240) and KAT2 (AT4G18290); III (weakly inward rectifying chan…
AT1G32700	F6N18.8	1.11192	1.15478	0.497203	0.981677	0.199032	0.184435	0.0893093	0.893953	840164	gene4117	NC_003070.9	11827359	11829933	2575	+	protein_coding	F6N18.8	.
AT5G37260	RVE2	3.62794	2.79152	2.76813	5.32187	0.0168253	0.0230699	0.0685991	0.0238994	833700	gene33880	NC_003076.8	14751344	14753088	1745	-	protein_coding	RVE2	Encodes a MYB family transcription factor Circadian 1 (CIR1). Involved in circadian regulation in Arabidopsis.
AT3G63010	GID1B	3.62393	4.51092	1.48929	1.76392	0.0374576	0.0203663	0.149819	0.0436655	825476	gene23568	NC_003074.8	23289243	23291486	2244	+	protein_coding	GID1B	Encodes a gibberellin (GA) receptor ortholog of the rice GA receptor gene (OsGID1). Has GA-binding activity, showing higher affinity to GA4. Interacts with DELLA proteins in vivo in the presence of GA4.
AT3G44735	PSK3	3.62266	2.93088	0.851683	0.626719	0.017609	0.047779	0.966754	0.0962254	823603	gene21133	NC_003074.8	16291147	16292464	1318	-	protein_coding	PSK3	Phytosulfokine 3 precursor, coding for a unique plant peptide growth factor.
AT1G67920	T23K23.23	3.62254	5.25148	0.877208	1.35365	0.0267459	0.0424064	0.559854	0.165208	843120	gene8024	NC_003070.9	25473544	25474140	597	+	protein_coding	T23K23.23	.
AT3G57880	AT3G57880	3.61807	3.17152	1.54195	1.28203	0.0119411	0.0155995	0.165486	0.0557458	824957	gene22905	NC_003074.8	21430922	21434648	3727	-	protein_coding	.	.
AT2G44380	F4I1.19	0.800885	1.1799	0.439349	0.379863	0.134649	0.201079	0.0893093	0.0386563	819045	gene15516	NC_003071.7	18323366	18324561	1196	-	protein_coding	F4I1.19	.
AT3G51660	AT3G51660	3.617	2.72414	1.6849	1.05835	0.0378423	0.0282912	0.299804	0.75916	824329	gene22101	NC_003074.8	19163995	19165322	1328	-	protein_coding	.	.
AT4G35720	F8D20.230	3.61476	3.3883	1.05796	1.70217	0.0307178	0.0361884	0.933503	0.146642	829724	gene28912	NC_003075.7	16927730	16929224	1495	+	protein_coding	F8D20.230	.
AT5G39520	MUL8.22	3.61014	8.30045	1.08252	1.56133	0.00999249	0.0203317	0.320405	0.055342	833948	gene34216	NC_003076.8	15823735	15825566	1832	-	protein_coding	MUL8.22	.
AT1G29330	ERD2	3.60873	3.3272	1.90439	1.65958	0.0433374	0.0215484	0.189927	0.0563059	839807	gene3638	NC_003070.9	10258248	10261232	2985	-	protein_coding	ERD2	Encodes a protein similar in sequence to animal and yeast endoplasmic reticulum retention signal receptor. This protein can functionally complement the yeast homologue. Transcript is detected in flower buds, stems, root, and leaves.
AT4G16563	AT4G16563	0.599589	0.804686	0.465619	0.703523	0.0824048	0.225024	0.0893093	0.0713067	827356	gene26356	NC_003075.7	9329620	9331646	2027	-	protein_coding	.	.
AT5G52400	CYP715A1	3.59878	1.75169	8.92965	2.88371	0.0192255	0.0427243	0.105394	0.107416	835316	gene35941	NC_003076.8	21272824	21275755	2932	+	protein_coding	CYP715A1	member of CYP715A
AT1G75830	LCR67	3.59712	1.11145	1.96548	1.94637	0.0460241	0.745457	0.180875	0.365077	843916	gene9032	NC_003070.9	28472357	28472898	542	+	protein_coding	LCR67	Predicted to encode a PR (pathogenesis-related) protein. Belongs to the plant defensin (PDF) family with the following members: At1g75830/PDF1.1, At5g44420/PDF1.2a, At2g26020/PDF1.2b, At5g44430/PDF1.2c, At2g26010/PDF1.3, At1g19610/PDF1.4, At1g55010/PDF1.5, At2g02120/PDF2.1, At2g02100/PDF2.2, At2g02130/PDF2.3, At1g61070/PDF2.4, At5g63660/PDF2.5, At2g02140/PDF2.6, At5g38330/PDF3.1 and At4g30070/PDF…
AT4G34990	MYB32	3.5951	3.16413	2.91209	2.77886	0.0457434	0.0407638	0.175504	0.0233633	829651	gene28813	NC_003075.7	16661101	16662549	1449	-	protein_coding	MYB32	Member of the R2R3 factor gene family.
AT4G39340	EC1.4	3.59236	1.97287	1.368	1.02344	0.117436	0.129983	0.947173	1	830089	gene29364	NC_003075.7	18293129	18293512	384	-	protein_coding	EC1.4	Encodes a small cysteine-rich protein that is secreted by the egg cell during gamete interactions. The regulated secretion of EC1 by the egg cell upon sperm-egg interaction is proposed to ensure the appropriate localization of the cell-fusion machinery in distinct sperm membrane domains to accomplish gamete fusion.
AT4G23450	AIRP1	3.59207	3.26739	1.95558	2.63088	0.0386192	0.0195249	0.235628	0.0310399	828444	gene27303	NC_003075.7	12240803	12242736	1934	-	protein_coding	AIRP1	AtAIRP1 gene encodes a C3H2C3-type RING E3 Ub ligase. It has been shown to be a positive regulator in the Arabidopsis ABA-dependent drought response.
AT3G55970	JRG21	36.1482	62.1367	17.2283	18.8771	0.0111056	0.01749	0.0893205	0.0382059	824763	gene22661	NC_003074.8	20766735	20769410	2676	-	protein_coding	JRG21	.
AT1G52000	F5F19.6	3.58832	2.9033	1.11586	1.06044	0.0164059	0.0149118	0.672807	0.686581	841629	gene5994	NC_003070.9	19333088	19336135	3048	-	protein_coding	F5F19.6	.
AT4G35560	DAW1	2.39355	2.69814	2.06188	2.33945	0.0630222	0.0547117	0.089956	0.0670022	829708	gene28891	NC_003075.7	16881336	16887083	5748	+	protein_coding	DAW1	Target promoter of the male germline-specific transcription factor DUO1.
AT1G19450	F18O14.22	1.18108	1.19043	2.87068	1.96629	0.115145	0.0504775	0.0901638	0.0807605	838529	gene2434	NC_003070.9	6731411	6735024	3614	-	protein_coding	F18O14.22	.
AT1G62975	AT1G62975	9.43912	8.60577	18.8392	14.5605	0.01327	0.012701	0.039	0.00414337	842600	gene7363	NC_003070.9	23328727	23330812	2086	+	protein_coding	.	.
AT3G09940	MDHAR	4.83033	5.64886	2.84962	1.34759	0.00636735	0.0143833	0.0904856	0.0971759	820155	gene17137	NC_003074.8	3056375	3059244	2870	-	protein_coding	MDHAR	Encodes a member of the monodehydroascorbate reductase gene family. Critical for a mutualistic symbiosis between the host Arabidopsis and the root colonizing fungus Piriformospora indica.
AT1G53920	GLIP5	2.30872	1.95466	3.02607	2.16363	0.0198438	0.0294106	0.0905837	0.0419755	841830	gene6271	NC_003070.9	20137537	20139716	2180	+	protein_coding	GLIP5	Contains lipase signature motif and GDSL domain.
AT3G02140	TMAC2	3.57224	3.82456	1.94517	1.62167	0.0553917	0.0255213	0.0623576	0.127571	821182	gene16168	NC_003074.8	385237	387051	1815	-	protein_coding	TMAC2	Encodes a protein that acts in the nucleus and is an important negative regulator of ABA and salt stress responses, and could play a critical role in controlling root elongation, floral initiation and starch degradation.
AT3G11420	AT3G11420	3.57201	3.63063	1.35963	1.53527	0.0402008	0.0306922	0.327316	0.0396388	820315	gene17329	NC_003074.8	3591251	3594589	3339	+	protein_coding	.	.
AT4G00360	CYP86A2	3.57076	4.09455	1.63577	1.50278	0.00649498	0.0126994	0.378766	0.0634605	828019	gene23696	NC_003075.7	160643	163023	2381	+	protein_coding	CYP86A2	Encodes a member of the CYP86A subfamily of cytochrome p450 genes. Expressed at moderate levels in flowers, leaves, roots and stems.
AT1G59700	GSTU16	3.56579	3.35302	1.60954	1.77387	0.0198438	0.0137479	0.649978	0.0700741	842261	gene6903	NC_003070.9	21936278	21938001	1724	+	protein_coding	GSTU16	Encodes glutathione transferase belonging to the tau class of GSTs. Naming convention according to Wagner et al. (2002).
AT1G04570	T1G11.18	3.56277	3.794	1.60945	1.52175	0.0139705	0.0260436	0.481227	0.135645	839486	gene467	NC_003070.9	1246601	1248876	2276	-	protein_coding	T1G11.18	.
AT2G38860	YLS5	2.17245	3.47309	3.06774	3.08973	0.0262137	0.0458806	0.0905837	0.0709594	818470	gene14761	NC_003071.7	16232859	16235367	2509	-	protein_coding	YLS5	Encodes protease I (pfpI)-like protein YLS5.
AT4G14365	XBAT34	3.55835	7.13443	0.681474	0.373372	0.0221941	0.0285511	0.535857	0.0869676	827080	gene26016	NC_003075.7	8271270	8273903	2634	-	protein_coding	XBAT34	.
AT4G09649	AT4G09649	3.55335	0.998222	5.21436	1.00037	0.658936	0.453885	0.734616	0.686581	6240235	gene25321	NC_003075.7	6100561	6100698	138	-	protein_coding	.	This gene encodes a small protein and has either evidence of transcription or purifying selection.
AT5G10380	RING1	3.55279	4.09854	1.1001	0.768573	0.0189435	0.0221348	0.827141	0.104726	830902	gene30631	NC_003076.8	3267635	3268813	1179	+	protein_coding	RING1	Encodes a RING finger domain protein with E3 ligase activity that is localized to the lipid rafts of the plasma membrane. Expression is increased in response to fungal pathogen. May be involved in regulation of programmed cell death by facilitating degredation of regulation of PDC activators.
AT5G62070	IQD23	3.55225	3.11023	1.60428	1.32476	0.01327	0.0417216	0.255486	0.226559	836327	gene37165	NC_003076.8	24929859	24932686	2828	-	protein_coding	IQD23	.
AT1G72120	AtNPF5.14	3.54654	2.92531	1.78856	2.33135	0.0123761	0.0181066	0.0780214	0.041076	843543	gene8566	NC_003070.9	27132014	27134101	2088	+	protein_coding	AtNPF5.14	.
AT2G39350	ABCG1	10.0847	10.1239	3.96245	3.79677	0.00773773	0.013153	0.0906433	0.033498	818520	gene14821	NC_003071.7	16430085	16432751	2667	-	protein_coding	ABCG1	Belongs to a clade of five Arabidopsis thaliana ABCG half-transporters that are required for synthesis of an effective suberin barrier in roots and seed coats (ABCG2, ABCG6, and ABCG20) and for synthesis of an intact pollen wall (ABCG1 and ABCG16).
AT1G21010	F9H16.19	3.53251	2.76216	1.41824	1.31352	0.0182965	0.0375555	0.419484	0.161032	838695	gene2636	NC_003070.9	7346156	7347283	1128	+	protein_coding	F9H16.19	.
AT1G78290	SNRK2-8	1.69104	2.21658	0.424208	0.818466	0.0495169	0.0681642	0.0906433	0.261256	844164	gene9360	NC_003070.9	29457205	29459493	2289	-	protein_coding	SNRK2-8	encodes a member of SNF1-related protein kinase (SnRK2) family whose activity is activated by ionic (salt) and non-ionic (mannitol) osmotic stress and dehydration.
AT4G01895	AT4G01895	3.52961	2.72441	3.3668	2.13236	0.0596762	0.157396	0.551443	0.397897	827073	gene23918	NC_003075.7	819957	820379	423	+	protein_coding	.	.
AT1G09180	SARA1A	3.52784	4.02818	1.2086	1.6557	0.0417912	0.0310954	0.374984	0.496662	837438	gene1078	NC_003070.9	2965023	2965972	950	+	protein_coding	SARA1A	A member of ARF-like GTPase family. A thaliana has 21 members, in two subfamilies, ARF and ARF-like (ARL) GTPases.
AT5G43760	KCS20	1.27195	1.32733	2.51529	2.09233	0.0362646	0.0417216	0.0906433	0.079781	834398	gene34795	NC_003076.8	17585523	17588733	3211	+	protein_coding	KCS20	Encodes KCS20, a member of the 3-ketoacyl-CoA synthase family involved in the biosynthesis of VLCFA (very long chain fatty acids).
AT4G15260	DL3675W	3.52085	3.23039	1.9887	1.8554	0.0180268	0.0277008	0.0989016	0.0473938	827192	gene26166	NC_003075.7	8713689	8715380	1692	+	protein_coding	DL3675W	.
AT3G43250	AT3G43250	3.51998	4.86507	7.97347	6.50112	0.0593948	0.0285922	0.0798613	0.0462526	823400	gene20845	NC_003074.8	15216585	15217574	990	+	protein_coding	.	.
AT1G28600	F1K23.28	3.51974	1.29119	1.6084	1.02952	0.0302358	0.162057	0.544279	0.963288	839760	gene3541	NC_003070.9	10050957	10053218	2262	-	protein_coding	F1K23.28	.
AT5G48540	MJE7.18	3.51559	5.44291	1.85815	1.49387	0.0236814	0.0191637	0.123077	0.134025	834910	gene35425	NC_003076.8	19668964	19669920	957	-	protein_coding	MJE7.18	.
AT4G12550	AIR1	0.713535	0.760015	0.316282	0.368319	0.0895507	0.0709258	0.0906433	0.0259183	826868	gene25723	NC_003075.7	7439115	7439805	691	+	protein_coding	AIR1	isolated from differential screening of a cDNA library from auxin-treated root culture. encodes a protein that is related to a large family of proteins that consist of a proline-rich or glycine-rich N-terminus and a hydrophobic, possibly membrane spanning C-terminus.
AT1G67856	AT1G67856	3.51112	3.91796	2.43287	2.2725	0.179035	0.0215484	0.210079	0.0587185	6240476	gene8016	NC_003070.9	25442404	25443690	1287	+	protein_coding	.	.
AT3G21700	SGP2	3.50966	3.07136	1.95199	2.08492	0.0141458	0.0231177	0.209797	0.124628	821724	gene18740	NC_003074.8	7644265	7646640	2376	+	protein_coding	SGP2	Monomeric G protein. Expressed in root epidermal cells that are destined to become atrichoblasts. Also expressed during pollen development and in the pollen tube tip.
AT1G36060	F5J5.5	0.378818	0.401147	0.38547	0.303218	0.0837512	0.103977	0.0906433	0.0338773	840510	gene4595	NC_003070.9	13454496	13456336	1841	-	protein_coding	F5J5.5	encodes a member of the DREB subfamily A-6 of ERF/AP2 transcription factor family. The protein contains one AP2 domain. There are 8 members in this subfamily including RAP2.4.
AT4G15670	DL3875W	3.50236	3.43173	1.76802	1.07235	0.0781967	0.0362185	0.255075	1	827244	gene26217	NC_003075.7	8929031	8929813	783	+	protein_coding	DL3875W	.
AT1G52080	AR791	3.50083	2.34372	1.06936	1.37229	0.0206514	0.0369504	0.750941	0.120822	841637	gene6003	NC_003070.9	19369089	19372121	3033	+	protein_coding	AR791	unknown function
AT3G21660	AT3G21660	3.5007	2.49233	1.00212	1.00085	0.033823	0.0569534	1	1	821720	gene18735	NC_003074.8	7624406	7626654	2249	-	protein_coding	.	.
AT4G34138	UGT73B1	3.49996	2.1068	0.925189	0.98563	0.0228203	0.0486817	0.734616	0.997194	829561	gene28706	NC_003075.7	16347997	16350203	2207	-	protein_coding	UGT73B1	.
AT3G13080	ABCC3	3.49972	2.26875	0.934525	0.755178	0.0188166	0.0257214	0.332033	0.0649241	820496	gene17546	NC_003074.8	4195770	4201734	5965	-	protein_coding	ABCC3	encodes an ATP-dependent MRP-like ABC transporter able to transport glutathione-conjugates as well as chlorophyll catabolites. The expression of this gene is upregulated by herbicide safeners such as benoxacor and fenclorim.
AT1G71140	F23N20.13	3.49918	3.55051	3.30605	3.60312	0.0402121	0.030345	0.0574911	0.0557458	843454	gene8456	NC_003070.9	26824564	26826914	2351	+	protein_coding	F23N20.13	.
AT1G50260	NTMC2T5.1	3.49777	2.86207	1.92641	2.35323	0.0318937	0.0387569	0.0818902	0.0345664	841448	gene5774	NC_003070.9	18617593	18621957	4365	-	protein_coding	NTMC2T5.1	.
AT1G73500	MKK9	3.49767	3.5585	1.97294	2.27492	0.015304	0.0439924	0.172616	0.0959934	843685	gene8733	NC_003070.9	27639091	27640643	1553	-	protein_coding	MKK9	member of MAP Kinase Kinase family. Autophosphorylates and also phosphorylates MPK3 and MPK6. Independently involved in ethylene and calmalexin biosynthesis. Induces transcription of ACS2, ACS6, ERF1, ERF2, ERF5, ERF6, CYP79B2, CYP79B3, CYP71A13 and PAD3.
AT1G30040	GA2OX2	3.37719	3.79958	5.24542	3.38744	0.0342431	0.0242903	0.0909404	0.0427641	839883	gene3738	NC_003070.9	10537457	10540044	2588	+	protein_coding	GA2OX2	Encodes a gibberellin 2-oxidase that acts on C-19 gibberellins. AtGA2OX2 expression is responsive to cytokinin and KNOX activities.
AT3G48990	AAE3	2.74071	2.40141	2.0552	2.14475	0.0083949	0.0181066	0.0909404	0.0174508	824060	gene21758	NC_003074.8	18158565	18161486	2922	-	protein_coding	AAE3	Encodes an oxalyl-CoA synthetase and is required for oxalate degradation, for normal seed development, and for defense against an oxalate-producing fungal pathogen.
AT3G06760	AT3G06760	3.48719	3.27823	1.59578	1.42546	0.0295167	0.0190006	0.207513	0.102862	819861	gene16794	NC_003074.8	2132758	2134665	1908	+	protein_coding	.	.
AT1G65845	AT1G65845	1.22163	1.53667	0.375959	0.302094	0.157026	0.0494484	0.0909404	0.0259183	842895	gene7744	NC_003070.9	24493011	24493923	913	-	protein_coding	.	.
AT4G33120	F4I10.50	3.48361	2.48847	1.59815	2.20942	0.0232348	0.0477249	0.251783	0.022353	829449	gene28571	NC_003075.7	15975343	15978136	2794	-	protein_coding	F4I10.50	.
AT1G22500	ATL15	0.581729	0.809191	0.298064	0.360438	0.0141757	0.257725	0.0909404	0.029492	838856	gene2832	NC_003070.9	7949476	7950900	1425	+	protein_coding	ATL15	Gene encodes a putative C3HC4-type RING zinc finger factor. it is induced in response to light and ascorbate stimulus.
AT4G37730	bZIP7	3.47824	2.94831	1.69843	2.09739	0.0267459	0.0238363	0.211679	0.0336269	829929	gene29169	NC_003075.7	17723639	17725037	1399	+	protein_coding	bZIP7	.
AT3G62270	BOR2	0.406669	0.473779	0.31823	0.390938	0.0215322	0.025481	0.0909404	0.024323	825400	gene23471	NC_003074.8	23042212	23046153	3942	-	protein_coding	BOR2	.
AT4G33560	T16L1.50	0.357977	0.433331	0.155543	0.196532	0.0179567	0.0310272	0.0909404	0.0445489	829495	gene28620	NC_003075.7	16135157	16135921	765	+	protein_coding	T16L1.50	.
AT2G19590	ACO1	0.311294	0.494275	0.437422	0.339966	0.0249322	0.0137479	0.0909404	0.019763	816478	gene12218	NC_003071.7	8475276	8477733	2458	-	protein_coding	ACO1	encodes a protein whose sequence is similar to 1-aminocyclopropane-1-carboxylate oxidase
AT1G07350	SR45a	3.46655	2.28453	0.587989	0.999382	0.0354112	0.0712657	0.131992	1	837246	gene845	NC_003070.9	2257384	2260187	2804	-	protein_coding	SR45a	Encodes a serine/arginine rich-like protein, SR45a. Involved in the regulation of stress-responsive alternative splicing.
AT2G18690	MSF3.7	3.46108	6.15938	0.876191	0.563427	0.024966	0.0314116	0.560292	0.0336269	816384	gene12104	NC_003071.7	8097420	8099393	1974	+	protein_coding	MSF3.7	.
AT1G01560	MPK11	3.45778	3.14593	1.53664	1.18935	0.0127888	0.0149349	0.734616	0.242363	839523	gene71	NC_003070.9	202103	204440	2338	+	protein_coding	MPK11	member of MAP Kinase
AT3G17770	AT3G17770	3.45703	3.02812	1.98528	2.53845	0.0141458	0.012701	0.11653	0.0387525	821045	gene18213	NC_003074.8	6081639	6086203	4565	-	protein_coding	.	.
AT1G76980	F22K20.8	3.45672	3.21972	1.74468	1.4734	0.0193539	0.0231177	0.215807	0.0587185	844034	gene9188	NC_003070.9	28925708	28927391	1684	-	protein_coding	F22K20.8	.
AT3G57700	AT3G57700	3.45631	3.04465	0.97236	0.881082	0.066102	0.031882	1	0.811876	824939	gene22880	NC_003074.8	21384917	21385939	1023	+	protein_coding	.	.
AT2G16060	HB1	0.435718	0.512148	0.339545	0.299874	0.0509643	0.0431892	0.0912223	0.0310399	816103	gene11759	NC_003071.7	6982531	6983777	1247	-	protein_coding	HB1	Encodes a class 1 nonsymbiotic hemoglobin induced by low oxygen levels with very high oxygen affinity. It is not likely to be a hemoglobin transporter because of its extremely high affinity for oxygen. Overexpression impairs cold stress-induced nitric oxide (NO) production.
AT2G45180	F4L23.31	0.181472	0.244873	0.249709	0.204426	0.0366082	0.0428198	0.0912864	0.0342996	819126	gene15620	NC_003071.7	18626188	18627157	970	+	protein_coding	F4L23.31	.
AT2G27150	AAO3	3.44663	2.62093	1.53999	1.54593	0.0114775	0.0188563	0.305003	0.0970598	817257	gene13243	NC_003071.7	11601727	11608450	6724	+	protein_coding	AAO3	Encodes the aldehyde oxidase delta isoform catalyzing the final step in abscisic acid biosynthesis.
AT4G27160	SESA3	3.44453	0.569562	1.10133	1.00033	0.121125	0.0332745	0.734616	0.686581	828824	gene27801	NC_003075.7	13611796	13612563	768	+	protein_coding	SESA3	.
AT3G44870	AT3G44870	7.06153	3.44931	9.55033	2.72315	0.0238764	0.123753	0.0913547	0.0203779	823621	gene21164	NC_003074.8	16382219	16383605	1387	+	protein_coding	.	.
AT2G13790	SERK4	3.44136	4.04146	1.18619	0.79572	0.0241972	0.029932	0.44152	0.143264	815862	gene11421	NC_003071.7	5741592	5746833	5242	+	protein_coding	SERK4	.
AT1G79520	T8K14.6	4.6108	5.5016	4.81682	8.39215	0.0146622	0.0227412	0.0913547	0.0476483	844290	gene9513	NC_003070.9	29911381	29914967	3587	-	protein_coding	T8K14.6	.
AT1G53830	PME2	0.784992	0.92799	0.398437	0.590574	0.105377	0.152059	0.0913547	0.0650357	841820	gene6257	NC_003070.9	20098522	20100978	2457	+	protein_coding	PME2	encodes a pectin methylesterase
AT3G53160	UGT73C7	3.43306	2.39611	5.4577	5.43239	0.03007	0.0465839	0.0532551	0.0366825	824482	gene22303	NC_003074.8	19702332	19703976	1645	-	protein_coding	UGT73C7	.
AT4G12520	T1P17.110	0.238499	0.201769	0.174127	0.161133	0.0845109	0.0855841	0.0913547	0.0349637	826864	gene25718	NC_003075.7	7420951	7421828	878	-	protein_coding	T1P17.110	.
AT3G14060	AT3G14060	3.42598	2.73768	0.718959	1.13493	0.0466379	0.0651811	0.503126	0.354821	820620	gene17705	NC_003074.8	4656782	4657723	942	-	protein_coding	.	.
AT4G16820	PLA-I{beta]2	3.42457	1.54935	3.5833	1.76266	0.0154646	0.0432254	0.106323	0.0398627	827388	gene26393	NC_003075.7	9467512	9469425	1914	+	protein_coding	PLA-I{beta]2	Encodes a lipase that hydrolyzes phosphatidylcholine, glycolipids as well as triacylglycerols.
AT3G20660	OCT4	2.55085	2.60136	2.26239	2.78008	0.0178494	0.0203663	0.0916138	0.0589731	821613	gene18595	NC_003074.8	7225037	7228797	3761	-	protein_coding	OCT4	.
AT5G50760	MFB16.16	0.58515	0.631288	0.310124	0.514968	0.0562623	0.0642783	0.0916138	0.0552183	835148	gene35737	NC_003076.8	20644525	20645698	1174	+	protein_coding	MFB16.16	.
AT3G48850	PHT3%3B2	3.41786	4.59579	1.18319	1.32677	0.0449446	0.0140741	0.374721	0.26827	824046	gene21745	NC_003074.8	18114526	18116569	2044	-	protein_coding	PHT3;2	Encodes a mitochondrial phosphate transporter. Modulates plant responses to salt stress.
AT4G25490	CBF1	3.41346	3.20831	0.986398	0.789441	0.0205468	0.0343761	1	0.292267	828653	gene27581	NC_003075.7	13021780	13022996	1217	-	protein_coding	CBF1	Transcriptional activator that binds to the DRE/CRT regulatory element and induces COR (cold-regulated) gene expression increasing plant freezing tolerance. It encodes a member of the DREB subfamily A-1 of ERF/AP2 transcription factor family (CBF1). The protein contains one AP2 domain. There are six members in this subfamily, including CBF1, CBF2, and CBF3. This gene is involved in response to lo…
AT1G70990	F15H11.18	0.415479	0.544625	0.383791	0.252756	0.0371949	0.0536351	0.0916138	0.041076	843438	gene8436	NC_003070.9	26767250	26768215	966	-	protein_coding	F15H11.18	.
AT1G19380	F18O14.10	3.40974	4.78	1.14946	0.64909	0.0124198	0.0319313	0.734616	0.128418	838521	gene2420	NC_003070.9	6697874	6698858	985	+	protein_coding	F18O14.10	.
AT5G19440	F7K24.190	5.41716	3.91215	3.07568	2.88836	0.0185923	0.0157471	0.0917269	0.0469628	832064	gene31734	NC_003076.8	6556348	6558373	2026	+	protein_coding	F7K24.190	similar to Eucalyptus gunnii alcohol dehydrogenase of unknown physiological function (GI:1143445), apple tree, PIR:T16995; NOT a cinnamyl-alcohol dehydrogenase
AT1G74360	F1M20.4	3.40343	3.45148	1.54996	1.05659	0.012371	0.0207844	0.123077	0.686581	843777	gene8840	NC_003070.9	27954129	27958114	3986	+	protein_coding	F1M20.4	.
AT4G22920	NYE1	3.4012	3.19029	1.13724	1.44331	0.0123861	0.0238363	0.129191	0.0468605	828391	gene27237	NC_003075.7	12016420	12018643	2224	-	protein_coding	NYE1	Similar to the tomato senescence-inducible chloroplast stay-green protein 1. It is upregulated during maximal senescence in the Arabidopsis life cycle, especially in senescent leaves. Acts antagonistically with SGR2 to balance chlorophyll catabolism in chloroplasts with the dismantling and remobilizing of other cellular components in senescing leaf cells.
AT2G21050	LAX2	0.392022	0.381393	0.47832	0.444678	0.04718	0.0498525	0.0917722	0.0430763	816640	gene12418	NC_003071.7	9034056	9036636	2581	+	protein_coding	LAX2	Encodes LAX2 (LIKE AUXIN RESISTANT), a member of the AUX1 LAX family of auxin influx carriers. Required for the establishment of embryonic root cell organization.
AT3G12320	LNK3	3.39169	3.4594	2.95606	3.95302	0.014761	0.0137479	0.207519	0.051504	820411	gene17439	NC_003074.8	3923515	3925502	1988	+	protein_coding	LNK3	.
AT5G36907	AT5G36907	3.39105	3.34077	3.59919	2.88544	0.0555542	0.0715297	0.275888	0.0397741	28721220	gene33822	NC_003076.8	14550119	14550859	741	-	protein_coding	.	.
AT1G56650	PAP1	3.38629	2.96994	1.53987	1.23791	0.0179095	0.0534449	0.341414	0.114033	842120	gene6638	NC_003070.9	21233555	21235292	1738	-	protein_coding	PAP1	Encodes a putative MYB domain containing transcription factor involved in anthocyanin metabolism and radical scavenging. Essential for the sucrose-mediated expression of the dihydroflavonol reductase gene. Auxin and ethylene responsiveness of PAP1 transcription is lost in myb12 mutants.
AT1G76890	GT2	0.821255	0.649766	0.381487	0.485749	0.0499248	0.0302091	0.0918595	0.0475723	844024	gene9169	NC_003070.9	28873052	28875435	2384	-	protein_coding	GT2	encodes a plant trihelix DNA-binding protein
AT5G03210	DIP2	79.1735	118.329	2.22206	3.71201	0.0114969	0.0352508	0.0922383	0.0687225	831903	gene29765	NC_003076.8	762604	763480	877	-	protein_coding	DIP2	Encodes a small polypeptide contributing to resistance to potyvirus.
AT4G17490	ERF6	3.37906	3.53352	0.963748	0.585283	0.0328215	0.0229748	0.632798	0.0433282	827463	gene26485	NC_003075.7	9752824	9754161	1338	-	protein_coding	ERF6	Encodes a member of the ERF (ethylene response factor) subfamily B-3 of ERF/AP2 transcription factor family (ATERF-6). The protein contains one AP2 domain. There are 18 members in this subfamily including ATERF-1, ATERF-2, AND ATERF-5. It is involved in the response to reactive oxygen species and light stress.
AT3G17110	AT3G17110	28.5887	25.8008	5.1269	6.27841	0.0180268	0.0285511	0.0922383	0.161024	3768803	gene18120	NC_003074.8	5837812	5838739	928	+	transcribed_pseudogene	.	.
AT4G02280	SUS3	3.03779	3.76536	2.49416	4.63623	0.0159163	0.0361127	0.0922383	0.0373174	828081	gene23975	NC_003075.7	994726	998991	4266	+	protein_coding	SUS3	Encodes a protein with sucrose synthase activity (SUS3). It appears to be important for sucrose metabolism in developing seeds, especially during the late maturation phase, about 18 days after flowering.
AT2G25690	F3N11.14	3.37313	3.93247	1.6278	1.59617	0.0238883	0.023304	0.160341	0.0253887	817110	gene13071	NC_003071.7	10940071	10942454	2384	-	protein_coding	F3N11.14	.
AT3G46280	AT3G46280	2.07905	1.45478	0.317142	0.235531	0.032222	0.0479652	0.0922383	0.0129816	823773	gene21367	NC_003074.8	17005423	17008528	3106	-	protein_coding	.	.
AT2G23320	WRKY15	3.37256	3.15614	1.40392	1.16721	0.0114202	0.0149349	0.340265	0.388851	816864	gene12728	NC_003071.7	9924886	9926372	1487	+	protein_coding	WRKY15	Encodes WRKY DNA-binding protein 15 (WRKY15).
AT3G47540	AT3G47540	3.36805	2.5101	2.13353	2.03406	0.0305045	0.0353579	0.172616	0.0306269	823908	gene21561	NC_003074.8	17520958	17522624	1667	+	protein_coding	.	.
AT1G22530	PATL2	0.348792	0.489247	0.458092	0.344535	0.00773773	0.0155084	0.0922383	0.0397741	838859	gene2837	NC_003070.9	7955445	7958564	3120	-	protein_coding	PATL2	.
AT5G61820	MAC9.6	18.4747	14.0459	3.15588	3.8104	0.00890394	0.0137747	0.092476	0.0252206	836304	gene37135	NC_003076.8	24834300	24836933	2634	-	protein_coding	MAC9.6	.
AT1G64950	CYP89A5	4.99888	4.43778	4.02964	2.98359	0.0169716	0.0135672	0.0928335	0.0610603	842803	gene7625	NC_003070.9	24127506	24129557	2052	+	protein_coding	CYP89A5	member of CYP89A
AT1G22470	F12K8.18	3.35898	2.56454	1.68122	1.32989	0.0196828	0.0717099	0.145116	0.36309	838853	gene2829	NC_003070.9	7932777	7933604	828	-	protein_coding	F12K8.18	.
AT1G20310	F14O10.9	3.35865	3.09176	2.92836	1.60755	0.0425447	0.0337815	0.138014	0.290623	838619	gene2533	NC_003070.9	7032070	7033329	1260	+	protein_coding	F14O10.9	.
AT2G29330	TRI	0.562523	0.594796	0.305928	0.322349	0.0144655	0.0222355	0.0928335	0.049463	817482	gene13520	NC_003071.7	12594536	12596438	1903	+	protein_coding	TRI	.
AT5G03380	F12E4.120	0.5723	0.829172	0.374002	0.424635	0.045794	0.0653729	0.0929984	0.0336269	831854	gene29787	NC_003076.8	832035	834549	2515	-	protein_coding	F12E4.120	.
AT2G01170	BAT1	0.227993	0.216201	0.339164	0.289952	0.0141458	0.0191271	0.0929984	0.0224682	814645	gene28418	NC_003071.7	102156	104574	2419	-	protein_coding	BAT1	Encodes a bidirectional amino acid transporter that can transport ala, arg, glu and lys, GABA but not pro with both export and import activity. Its expression is localized in the vascular tissues suggesting a function in amino acids export from the phloem into sink tissue.
AT2G40180	PP2C5	3.34161	3.01221	2.85936	1.92763	0.0420626	0.0497502	0.20994	0.0370599	818609	gene14943	NC_003071.7	16782366	16784147	1782	+	protein_coding	PP2C5	Encodes PP2C5, a member of the PP2C family phosphatases. PP2C5 acts as a MAPK phosphatase that positively regulates seed germination, stomatal closure and ABA-inducible gene expression.
AT1G58520	RXW8	3.33965	3.41775	1.442	2.34976	0.0307782	0.0137674	0.734616	0.0421622	842218	gene6852	NC_003070.9	21729913	21738808	8896	+	protein_coding	RXW8	.
AT5G12140	CYS1	1.50276	1.54983	2.20266	2.02329	0.0384382	0.0636498	0.0933482	0.0567544	831087	gene30848	NC_003076.8	3922591	3924058	1468	-	protein_coding	CYS1	Encodes a cystatin.
AT2G47780	F17A22.17	3.33177	3.1524	4.11828	9.41629	0.033146	0.0496588	0.0840291	0.0285457	819390	gene15966	NC_003071.7	19570040	19571034	995	+	protein_coding	F17A22.17	.
AT5G47880	ERF1-1	1.85425	1.89575	2.00148	2.4381	0.0220872	0.0154361	0.0938383	0.0968354	834839	gene35342	NC_003076.8	19386045	19388587	2543	-	protein_coding	ERF1-1	Encodes a eukaryotic release factor 1 homolog. Cosuppression of the gene's expression results affects cell elongation of the inflorescence stem, specifically the internodes, and radial cell division. Expression of the protein is primarily observed in the vascular system and in actively growing and elongating zones.
AT4G18950	F13C5.120	3.32964	2.49234	1.49593	1.07617	0.0131198	0.0420447	0.255727	0.227174	827630	gene26693	NC_003075.7	10375244	10378416	3173	+	protein_coding	F13C5.120	.
AT1G07150	MAPKKK13	7.82791	6.37231	3.69588	5.51123	0.00925104	0.0168402	0.0942228	0.0222497	837226	gene822	NC_003070.9	2193941	2195996	2056	-	protein_coding	MAPKKK13	member of MEKK subfamily
AT5G04370	NAMT1	3.32816	2.89576	4.47487	7.54362	0.0656868	0.111179	0.116998	0.0291352	830316	gene29920	NC_003076.8	1231609	1234147	2539	+	protein_coding	NAMT1	A member of the Arabidopsis SABATH methyltransferase gene family. Encodes NAMT1, a methyltransferase that methylates nicotinic acid.
AT3G15200	AT3G15200	3.32801	4.62001	2.14517	1.87937	0.026988	0.0217654	0.273641	0.0834839	820751	gene17855	NC_003074.8	5117489	5119060	1572	-	protein_coding	.	.
AT3G07390	AIR12	1.54219	1.6549	2.81293	2.47764	0.0380815	0.0337449	0.094252	0.0751133	819927	gene16882	NC_003074.8	2365301	2366496	1196	+	protein_coding	AIR12	isolated from differential screening of a cDNA library from auxin-treated root culture. sequence does not show homology to any known proteins and is predicted to be extracellular.
AT3G02150	PTF1	3.32462	3.58815	2.80794	2.41854	0.01327	0.0155084	0.501449	0.10745	821061	gene16170	NC_003074.8	390720	392767	2048	+	protein_coding	PTF1	a chloroplast trans-acting factor of the psbD light-responsive promoter.TCP gene involved in heterochronic control of leaf differentiation.
AT2G40170	GEA6	3.32232	3.5827	5.23193	6.88567	0.0495964	0.0168402	0.0685991	0.125295	818608	gene14942	NC_003071.7	16779552	16780368	817	-	protein_coding	GEA6	Encodes a group 1 LEA gene that is activated by direct binding of ABI5 to its promoter and is involved in response to ABA. Is required for normal seed development. Involved in regulating the timing of dessication tolerance and rate of water loss during seed maturation.
AT2G37970	SOUL-1	3.32123	3.45597	1.76195	1.51481	0.014208	0.0282912	0.239359	0.114517	818374	gene14651	NC_003071.7	15890869	15891704	836	+	protein_coding	SOUL-1	.
AT4G24160	T19F6.150	3.32007	3.24012	1.30859	0.699229	0.0114837	0.0126019	0.0950084	0.0644846	828516	gene27409	NC_003075.7	12539656	12542489	2834	+	protein_coding	T19F6.150	Encodes a soluble lysophosphatidic acid acyltransferase with additional triacylglycerol lipase and phosphatidylcholine hydrolyzing enzymatic activities. Plays a pivotal role in maintaining the lipid homeostasis by regulating both phospholipid and neutral lipid levels.
AT3G45140	LOX2	3.31829	5.26987	1.41506	1.09065	0.0104467	0.0191386	0.193028	0.393255	823650	gene21200	NC_003074.8	16525245	16529352	4108	+	protein_coding	LOX2	Chloroplast lipoxygenase required for wound-induced jasmonic acid accumulation in Arabidopsis.Mutants are resistant to Staphylococcus aureus and accumulate salicylic acid upon infection.
AT2G18050	HIS1-3	0.581417	0.825829	0.169061	0.962579	0.0334458	0.305443	0.094582	0.79896	816317	gene12029	NC_003071.7	7845923	7847031	1109	+	protein_coding	HIS1-3	encodes a structurally divergent linker histone whose gene expression is induced by dehydration and ABA.
AT3G09865	AT3G09865	3.31112	0.998192	0.179216	0.179039	0.658936	0.453885	0.734616	0.686581	28719251	gene23528	NC_003074.8	23181704	23181833	130	-	snoRNA	.	AtsnoR83
AT5G51070	ERD1	3.30375	3.01745	1.46871	1.74052	0.0208507	0.0289844	0.10365	0.0645842	835180	gene35770	NC_003076.8	20764096	20768764	4669	+	protein_coding	ERD1	ATP-dependent Clp protease regulatory subunit
AT1G64380	F15H21.12	11.0751	13.75	5.02234	3.94746	0.0178107	0.0137479	0.0947549	0.109601	842745	gene7545	NC_003070.9	23890570	23892193	1624	-	protein_coding	F15H21.12	encodes a member of the DREB subfamily A-6 of ERF/AP2 transcription factor family. The protein contains one AP2 domain. There are 8 members in this subfamily including RAP2.4.
AT5G61590	Decrease Wax Biosynthesis	0.208498	0.211282	0.346276	0.772621	0.034323	0.0383955	0.0947997	0.0659365	836280	gene37109	NC_003076.8	24764256	24765511	1256	-	protein_coding	Decrease Wax Biosynthesis	encodes a member of the ERF (ethylene response factor) subfamily B-3 of ERF/AP2 transcription factor family. The protein contains one AP2 domain. There are 18 members in this subfamily including ATERF-1, ATERF-2, AND ATERF-5.
AT5G12010	F14F18.180	8.86694	4.91616	3.95056	2.65719	0.0122325	0.0151842	0.0948187	0.04701	831074	gene30832	NC_003076.8	3877680	3879657	1978	-	protein_coding	F14F18.180	.
AT5G64905	PROPEP3	3.29251	5.44217	1.79366	1.3959	0.06193	0.0870944	0.334359	0.360358	836614	gene37516	NC_003076.8	25939562	25940080	519	+	protein_coding	PROPEP3	.
AT4G35690	F8D20.200	3.28904	3.01904	4.21549	8.48671	0.0426164	0.133717	0.256723	0.0475931	829721	gene28909	NC_003075.7	16921800	16922963	1164	+	protein_coding	F8D20.200	.
AT4G32800	T16I18.10	3.76402	4.05909	3.38685	1.41763	0.0257574	0.012701	0.0948187	0.0523907	829416	gene28534	NC_003075.7	15819489	15820879	1391	+	protein_coding	T16I18.10	encodes a member of the DREB subfamily A-4 of ERF/AP2 transcription factor family. The protein contains one AP2 domain. There are 17 members in this subfamily including TINY.
AT3G20300	AT3G20300	3.28124	2.11012	3.15241	5.19091	0.0361432	0.0271131	0.149819	0.0268778	821574	gene18551	NC_003074.8	7079492	7082178	2687	-	protein_coding	.	.
AT2G35940	BLH1	3.27942	3.20966	1.51565	2.09571	0.0150602	0.0172871	0.0530826	0.0285878	818167	gene14397	NC_003071.7	15088762	15092415	3654	-	protein_coding	BLH1	Encodes a member of the BEL-like homeodomain protein family. Ecotopic expression in the embryo sac leads to defects in nuclear migration and cellularization and embryo sacs with multiple egg cells. Loss of function alleles have no female gametophyte defects. The ecotopic expression phenotype requires KNAT3 because it can be suppressed by loss of KNAT3 function alleles. Localized to the nucleus bu…
AT5G64510	TIN1	3.27907	2.64434	0.771636	1.97636	0.0158087	0.0245049	0.29772	0.0680079	836572	gene37458	NC_003076.8	25784404	25786385	1982	+	protein_coding	TIN1	Encodes Tunicamycin Induced 1(TIN1), a plant-speci#c ER stress-inducible protein. TIN1 mutation affects pollen surface morphology. Transcriptionally induced by treatment with the N-linked glyclsylation inhibitor tunicamycin.
AT5G24165	AT5G24165	0.79036	0.832065	0.304649	0.416493	0.135651	0.291726	0.0948187	0.0518275	832483	gene32245	NC_003076.8	8188166	8189470	1305	+	protein_coding	.	.
AT3G48510	AT3G48510	7.83803	10.3443	11.6707	16.4052	0.0370149	0.0159562	0.0950084	0.0560625	824010	gene21700	NC_003074.8	17967354	17968590	1237	-	protein_coding	.	.
AT2G34140	T14G11.26	2.21938	1.66544	2.90726	2.45146	0.0246081	0.266701	0.0951338	0.0681531	817975	gene14148	NC_003071.7	14413694	14414788	1095	-	protein_coding	T14G11.26	.
AT1G68250	T22E19.12	3.2746	1.25675	3.1965	2.14735	0.0544815	0.222595	0.0623576	0.039018	843154	gene8061	NC_003070.9	25579373	25580199	827	-	protein_coding	T22E19.12	.
AT2G34070	TBL37	10.3764	7.5977	2.1393	1.98519	0.0182229	0.0213304	0.0952436	0.102823	817968	gene14138	NC_003071.7	14387194	14390339	3146	-	protein_coding	TBL37	Encodes a member of the TBL (TRICHOME BIREFRINGENCE-LIKE) gene family containing a plant-specific DUF231 (domain of unknown function) domain. TBL gene family has 46 members, two of which (TBR/AT5G06700 and TBL3/AT5G01360) have been shown to be involved in the synthesis and deposition of secondary wall cellulose, presumably by influencing the esterification state of pectic polymers. A nomenclature…
AT3G53600	AT3G53600	5.1928	5.18758	11.8214	4.22505	0.0416138	0.0462003	0.0952436	0.0867796	824528	gene22361	NC_003074.8	19875375	19876177	803	+	protein_coding	.	.
AT1G74930	ORA47	3.27288	1.56278	0.87437	0.919968	0.0200509	0.14132	0.397257	0.215665	843832	gene8920	NC_003070.9	28143851	28145058	1208	+	protein_coding	ORA47	encodes a member of the DREB subfamily A-5 of ERF/AP2 transcription factor family. The protein contains one AP2 domain. There are 15 members in this subfamily including RAP2.1, RAP2.9 and RAP2.10.
AT1G68440	T2E12.1	3.27067	2.93499	1.39845	1.71189	0.015304	0.044771	0.484779	0.198628	843173	gene8086	NC_003070.9	25657757	25659484	1728	+	protein_coding	T2E12.1	.
AT1G08570	ACHT4	3.26821	2.99906	1.8739	3.0542	0.0122325	0.0155084	0.251347	0.0553402	837379	gene1005	NC_003070.9	2712694	2714833	2140	+	protein_coding	ACHT4	Encodes a member of the thioredoxin family protein. Located in the chloroplast. Shows high activity towards the chloroplast 2-Cys peroxiredoxin A, and poor activity towards the chloroplast NADP-malate dehydrogenase.
AT5G62020	HSFB2A	3.26757	2.83727	1.56102	1.79998	0.0327114	0.0137479	0.0698174	0.0422598	836322	gene37159	NC_003076.8	24915807	24917643	1837	+	protein_coding	HSFB2A	member of Heat Stress Transcription Factor (Hsf) family
AT2G04555	AT2G04555	3.2669	0.811589	0.689673	1.48356	0.197478	0.67153	0.734616	0.989776	28717578	gene10066	NC_003071.7	1122594	1122824	231	+	lncRNA	.	Natural antisense transcript overlaps with AT2G03690
AT3G13650	AT3G13650	3.61806	3.87005	7.09498	3.56153	0.045027	0.0313197	0.095375	0.0306642	820569	gene17637	NC_003074.8	4462841	4463955	1115	+	protein_coding	.	.
AT2G35950	EDA12	3.26295	2.79131	1.84532	2.35251	0.0259911	0.0285922	0.297304	0.188581	818168	gene14399	NC_003071.7	15104716	15106119	1404	+	protein_coding	EDA12	.
AT5G17300	RVE1	3.26192	3.00277	3.40486	5.80637	0.0142785	0.026157	0.1588	0.022353	831595	gene31448	NC_003076.8	5690225	5692992	2768	-	protein_coding	RVE1	Myb-like transcription factor that regulates hypocotyl growth by regulating free auxin levels in a time-of-day specific manner.
AT3G09815	AT3G09815	3.26105	3.26154	1.63627	2.36768	0.0386986	0.016404	0.512257	0.298656	28719246	gene23514	NC_003074.8	23150247	23150606	360	+	lncRNA	.	Natural antisense transcript overlaps with AT3G62590
AT3G54020	AtIPCS1	3.25901	4.50041	0.930747	0.489931	0.039701	0.0137479	0.907366	0.0360821	824569	gene22406	NC_003074.8	20005616	20008254	2639	+	protein_coding	AtIPCS1	Inositol phosphorylceramide synthase
AT5G23950	MRO11.1	3.25054	3.43331	3.86582	3.0863	0.0591811	0.0912831	0.0457193	0.0430763	832460	gene32217	NC_003076.8	8082650	8083772	1123	+	protein_coding	MRO11.1	.
AT5G62570	calmodulin-binding protein 60a	3.24835	3.71788	0.845313	0.596247	0.0149784	0.012701	0.335531	0.0681531	836377	gene37223	NC_003076.8	25113948	25117314	3367	+	protein_coding	calmodulin-binding protein 60a	.
AT3G13910	AT3G13910	3.24813	3.86223	1.73786	1.47149	0.0417912	0.0241317	0.479922	0.0893033	820604	gene17683	NC_003074.8	4590684	4591541	858	-	protein_coding	.	.
AT5G16980	F2K13.130	3.24612	4.33152	1.44421	1.65636	0.0532296	0.0304556	0.285483	0.166263	831561	gene31408	NC_003076.8	5578846	5581311	2466	-	protein_coding	F2K13.130	.
AT3G17810	PYD1	3.24513	3.43304	1.75226	1.91075	0.0207364	0.0213095	0.160027	0.0580581	821049	gene18218	NC_003074.8	6093990	6096688	2699	+	protein_coding	PYD1	Encodes a protein predicted to have dihydropyrimidine dehydrogenase activity. Its activity has not been demonstrated in vivo, but, it is required for efficient uracil catabolism in Arabidopsis. It localizes to the plastid.
AT3G18950	AT3G18950	3.24494	2.49523	3.29833	3.45133	0.00987685	0.0322072	0.0770761	0.0440042	821427	gene18376	NC_003074.8	6536534	6538679	2146	+	protein_coding	.	.
AT5G63130	MDC12.9	3.24488	4.27356	1.52309	1.43726	0.04124	0.0332143	0.205829	0.107249	836433	gene37300	NC_003076.8	25322975	25324739	1765	+	protein_coding	MDC12.9	.
AT1G18710	MYB47	3.2443	3.71379	2.88915	2.61078	0.0666605	0.0288164	0.168804	0.0489739	838453	gene2326	NC_003070.9	6450585	6453263	2679	+	protein_coding	MYB47	Member of the R2R3 factor gene family.
AT4G18510	CLE2	3.24391	3.16944	1.59351	1.12537	0.0602706	0.0319313	0.335773	0.588277	827583	gene26637	NC_003075.7	10211577	10212452	876	+	protein_coding	CLE2	CLE2, putative ligand, member of large gene family homologous to Clavata3
AT3G50980	XERO1	3.24327	4.24203	2.58313	5.00737	0.032054	0.0490506	0.302029	0.0873511	824262	gene22017	NC_003074.8	18941925	18942940	1016	+	protein_coding	XERO1	.
AT1G06180	MYB13	3.24219	2.57914	1.74244	2.24758	0.0147415	0.0164376	0.300447	0.105752	837127	gene694	NC_003070.9	1889362	1891276	1915	+	protein_coding	MYB13	member of MYB3R- and R2R3- type MYB- encoding genes
AT4G22070	WRKY31	3.26621	3.00992	3.07729	1.82254	0.0265149	0.0222864	0.095573	0.0941136	828296	gene27113	NC_003075.7	11691172	11694590	3419	-	protein_coding	WRKY31	member of WRKY Transcription Factor; Group II-b
AT1G69840	T17F3.13	3.24115	3.15886	1.19461	0.792151	0.0182965	0.024146	0.251356	0.142287	843320	gene8290	NC_003070.9	26293588	26295922	2335	-	protein_coding	T17F3.13	.
AT5G03204	AT5G03204	3.23693	4.41317	1.92815	2.76756	0.339273	0.0137479	0.425577	0.0833967	28720539	gene29764	NC_003076.8	762044	762507	464	-	protein_coding	.	This gene encodes a small protein and has either evidence of transcription or purifying selection.
AT3G55430	AT3G55430	3.23527	3.22487	1.45713	0.918129	0.0104467	0.0126994	0.224108	0.141656	824709	gene22579	NC_003074.8	20549423	20552215	2793	-	protein_coding	.	.
AT1G62570	FMO GS-OX4	27.6829	26.6547	10.0287	10.8829	0.00925104	0.0137479	0.0957325	0.0174508	842554	gene7303	NC_003070.9	23168767	23172175	3409	+	protein_coding	FMO GS-OX4	belongs to the flavin-monooxygenase (FMO) family, encodes a glucosinolate S-oxygenase that catalyzes the conversion of methylthioalkyl glucosinolates to methylsulfinylalkyl glucosinolates
AT3G60930	AT3G60930	3.2322	2.48034	2.99023	3.61469	0.0180268	0.0448295	0.104538	0.0657111	825264	gene23282	NC_003074.8	22514027	22516871	2845	+	pseudogene	.	.
AT3G06520	F5E6.15	3.23034	2.14321	1.17455	1.32406	0.0264804	0.049069	0.71462	0.425335	819830	gene16761	NC_003074.8	2019849	2022102	2254	+	protein_coding	F5E6.15	.
AT3G03470	CYP89A9	3.22818	3.59877	0.552679	0.949194	0.0127003	0.0253322	0.278145	0.431785	821250	gene16333	NC_003074.8	824552	826585	2034	-	protein_coding	CYP89A9	member of CYP89A
AT2G37170	PIP2B	1.94683	3.00163	0.385996	0.637589	0.0175851	0.0300806	0.0957325	0.0372787	818293	gene14554	NC_003071.7	15613368	15615022	1655	-	protein_coding	PIP2B	a member of the plasma membrane intrinsic protein subfamily PIP2. localizes to the plasma membrane and exhibits water transport activity in Xenopus oocyte. expressed specifically in the vascular bundles and protein level increases slightly during leaf dev
AT4G13310	CYP71A20	3.22267	3.06176	0.80244	0.844115	0.0303857	0.0290553	0.117161	0.0995542	826961	gene25842	NC_003075.7	7750305	7753210	2906	+	protein_coding	CYP71A20	putative cytochrome P450
AT3G03215	AT3G03215	3.22262	1.61364	0.630456	0.714372	0.102397	0.378695	0.0913088	0.377672	28718640	gene17980	NC_003074.8	5444368	5444626	259	+	lncRNA	.	Natural antisense transcript overlaps with AT3G16050
AT4G36830	HOS3-1	1.84129	1.79661	2.9147	2.54951	0.0718969	0.0603489	0.0957325	0.127429	829836	gene29048	NC_003075.7	17349218	17351163	1946	+	protein_coding	HOS3-1	.
AT2G39800	P5CS1	12.9451	11.02	4.59646	6.42062	0.0122091	0.0174456	0.096096	0.0337532	818566	gene14886	NC_003071.7	16598072	16603319	5248	-	protein_coding	P5CS1	encodes a delta1-pyrroline-5-carboxylate synthase that catalyzes the rate-limiting enzyme in the biosynthesis of proline. Gene is expressed in reproductive organs and tissues under non-stress conditions but in the whole plant under water-limiting condition. Expression is also induced by abscisic acid and salt stress in a light-dependent manner. encodes a delta1-pyrroline-5-carboxylate synthase th…
AT5G14470	AtGALK2	3.21786	2.10397	2.95919	3.04605	0.051773	0.117317	0.13481	0.0238994	831298	gene31089	NC_003076.8	4662775	4664681	1907	-	protein_coding	AtGALK2	.
AT1G54050	F15I1.13	3.21695	1.24754	0.593114	1.29709	0.0477565	0.185882	0.11653	0.0484571	841843	gene6286	NC_003070.9	20179357	20180566	1210	-	protein_coding	F15I1.13	.
AT5G05190	K2A11.6	3.21608	2.31615	0.690671	0.447132	0.0242066	0.0409061	0.096096	0.0462526	830401	gene30018	NC_003076.8	1541218	1544137	2920	+	protein_coding	K2A11.6	.
AT1G74080	MYB122	3.2113	3.6051	3.78886	5.75066	0.0551885	0.0513629	0.19086	0.0222995	843748	gene8807	NC_003070.9	27855578	27857598	2021	+	protein_coding	MYB122	Encodes a putative transcription factor, member of the R2R3 factor gene family (MYB122).
AT5G43420	MWF20.13	3.21022	4.01056	0.990557	0.565042	0.036093	0.0187561	0.765445	0.0449769	834362	gene34746	NC_003076.8	17451488	17453124	1637	+	protein_coding	MWF20.13	.
AT2G44810	DAD1	3.20753	8.00898	2.23476	1.45735	0.111297	0.0374741	0.0867748	0.17614	819090	gene15571	NC_003071.7	18478374	18480457	2084	+	protein_coding	DAD1	Mutant has defects in anther dehiscence, pollen maturation, and flower opening. The DAD1 protein is a chloroplastic phospholipase A1 that catalyzes the initial step of jasmonic acid biosynthesis.
AT5G39890	MYH19.8	0.239308	0.331811	0.1484	0.252519	0.034207	0.0484896	0.096096	0.051504	833986	gene34267	NC_003076.8	15974270	15976270	2001	+	protein_coding	MYH19.8	.
AT1G43910	F9C16.7	3.20424	3.44387	0.986419	0.748745	0.0234994	0.0228346	1	0.0226321	840990	gene5171	NC_003070.9	16655884	16657686	1803	-	protein_coding	F9C16.7	.
AT3G57540	AtREM4.1	3.20367	3.78401	1.21656	1.71723	0.0305045	0.050727	0.472148	0.0308745	824921	gene22858	NC_003074.8	21301397	21303230	1834	-	protein_coding	AtREM4.1	.
AT1G76590	F14G6.19	3.19497	3.03515	1.06596	2.42615	0.0618429	0.0170309	1	0.0569311	843992	gene9126	NC_003070.9	28740540	28742231	1692	+	protein_coding	F14G6.19	.
AT2G29460	GSTU4	23.3496	29.1503	19.1495	21.7892	0.0125218	0.0151842	0.0962917	0.0243682	817495	gene13536	NC_003071.7	12626478	12627891	1414	-	protein_coding	GSTU4	Encodes glutathione transferase belonging to the tau class of GSTs. Naming convention according to Wagner et al. (2002).
AT1G53470	MSL4	10.0695	8.75263	7.32083	8.31452	0.0127888	0.0168402	0.0962917	0.019763	841782	gene6195	NC_003070.9	19958380	19961827	3448	+	protein_coding	MSL4	.
AT1G23710	F5O8.26	3.19017	2.62408	1.01568	0.852915	0.00773773	0.015704	0.937047	0.324997	838981	gene2975	NC_003070.9	8385188	8386522	1335	+	protein_coding	F5O8.26	.
AT4G23590	F9D16.60	3.18949	2.34363	1.65757	2.51346	0.0646695	0.0203663	0.359847	0.0412392	828459	gene27325	NC_003075.7	12307126	12309664	2539	+	protein_coding	F9D16.60	.
AT5G07920	DGK1	3.18551	3.84169	1.34202	1.25949	0.0172111	0.0137479	0.135573	0.053117	830686	gene30366	NC_003076.8	2524687	2529421	4735	-	protein_coding	DGK1	diacylglycerol kinase
AT3G47380	AT3G47380	5.74502	4.78416	10.7746	5.65851	0.0128095	0.0169167	0.0962917	0.111426	823892	gene21541	NC_003074.8	17457614	17458599	986	+	protein_coding	.	.
AT5G60790	ABCF1	3.18077	2.43369	1.74356	1.89333	0.012387	0.0164183	0.133863	0.0541087	836200	gene37009	NC_003076.8	24453258	24456115	2858	-	protein_coding	ABCF1	member of GCN subfamily
AT3G27170	CLC-B	3.17425	3.59317	1.08282	0.84352	0.0156681	0.0332207	0.734616	0.130841	822336	gene19529	NC_003074.8	10023931	10027198	3268	+	protein_coding	CLC-B	member of Anion channel protein family
AT2G08960	AT2G08960	3.173	4.45144	7.80827	6.41802	0.0896995	0.386159	0.159978	0.669115	28718057	gene14702	NC_003071.7	16067894	16068098	205	+	lncRNA	.	Natural antisense transcript overlaps with AT2G38340
AT4G37760	SQE3	3.17258	2.52281	1.58056	1.6993	0.0083949	0.0137479	0.124104	0.0766199	829932	gene29173	NC_003075.7	17743738	17746697	2960	+	protein_coding	SQE3	.
AT3G53540	TRM19	0.867328	0.822927	3.7154	6.60806	0.230793	0.146013	0.0963733	0.0203766	824522	gene22352	NC_003074.8	19846647	19851045	4399	-	protein_coding	TRM19	.
AT5G67340	K8K14.6	2.30312	3.03943	2.49336	2.10217	0.0208507	0.0199446	0.09639	0.0335469	836869	gene37854	NC_003076.8	26864395	26867847	3453	+	protein_coding	K8K14.6	.
AT5G37550	MPA22.10	3.16895	4.11817	1.45124	0.754954	0.01107	0.0372751	0.325218	0.154937	833733	gene33928	NC_003076.8	14918901	14920025	1125	-	protein_coding	MPA22.10	.
AT5G50360	MXI22.7	3.16852	4.65339	7.76641	20.2051	0.0194027	0.0195162	0.0498614	0.0150164	835103	gene35679	NC_003076.8	20505089	20506354	1266	-	protein_coding	MXI22.7	.
AT5G09220	AAP2	0.803324	0.84251	0.465148	0.685724	0.0768103	0.0914944	0.0964332	0.0401921	830781	gene30483	NC_003076.8	2866222	2869156	2935	+	protein_coding	AAP2	member of AAAP family
AT5G64750	ABR1	73.8768	58.9035	20.9803	17.1333	0.00475032	0.0137747	0.0964383	0.0347999	836596	gene37494	NC_003076.8	25891449	25893888	2440	+	protein_coding	ABR1	Encodes a putative transcription factor containing an AP2 domain. Is a member of the ERF (ethylene response factor) subfamily B-4 of ERF/AP2 transcription factor family. Expressed in response to ABA, osmotic stress, sugar stress and drought. Mutants are hypersensitive to these stresses. May be involved in regulation of ABA mediated stress response.
AT5G54840	SGP1	3.16497	2.7833	1.48643	1.76406	0.0136618	0.020325	0.147578	0.0400209	835574	gene36260	NC_003076.8	22276343	22278423	2081	-	protein_coding	SGP1	Monomeric G protein. Expressed in the root quiescent center, flowers, and leaf guard cells and hydathodes.
AT1G68570	AtNPF3.1	3.16317	2.5146	0.767581	0.910946	0.0182965	0.040446	0.478855	0.722846	843186	gene8101	NC_003070.9	25746697	25750291	3595	+	protein_coding	AtNPF3.1	.
AT3G55980	SZF1	3.15784	4.4564	0.856967	0.575958	0.0162527	0.0189592	0.204613	0.0268778	824764	gene22662	NC_003074.8	20776220	20778952	2733	+	protein_coding	SZF1	.
AT1G53625	AT1G53625	3.15444	3.67389	0.912889	0.603325	0.0327869	0.0282516	0.596651	0.0826542	841798	gene6223	NC_003070.9	20014379	20015038	660	-	protein_coding	.	.
AT1G63720	F24D7.9	3.15435	3.01814	1.22652	1.77004	0.0182965	0.0463349	0.490404	0.154462	842676	gene7456	NC_003070.9	23635745	23637577	1833	-	protein_coding	F24D7.9	.
AT1G03790	SOM	3.15395	5.03664	4.43161	11.3453	0.0520403	0.0448839	0.188712	0.0233633	839408	gene367	NC_003070.9	954290	956144	1855	+	protein_coding	SOM	Encodes SOMNUS (SOM), a nucleus-localized CCCH-type zinc finger protein. SOM negatively regulates light-dependent seed germination downstream of PIL5 (AT2G20180).
AT2G05580	T20G20.7	3.15094	2.98641	1.69424	1.25135	0.034207	0.0396122	0.440186	0.313226	3768507	gene10361	NC_003071.7	2055519	2056745	1227	+	protein_coding	T20G20.7	.
AT4G36010	T19K4.140	8.65946	9.76536	2.85241	2.53083	0.0125218	0.0213731	0.0964383	0.019951	829757	gene28948	NC_003075.7	17039063	17041326	2264	-	protein_coding	T19K4.140	.
AT5G18130	MRG7.9	3.14831	3.69704	1.10813	2.0042	0.0248852	0.0211232	0.618472	0.0709292	831931	gene31557	NC_003076.8	5995323	5997498	2176	+	protein_coding	MRG7.9	.
AT3G45300	IVD	3.14682	3.697	1.33821	1.9933	0.0324854	0.0137479	0.107122	0.0429544	823668	gene21229	NC_003074.8	16621452	16625043	3592	-	protein_coding	IVD	Encodes isovaleryl-coenzyme a dehydrogenase. Mutants have increases in 12 seed free amino acids, accumulation of seed homomethionine and 3-isovaleroyloxypropyl-glucosinolate, with a concomitant decrease in seed 3-benzoyloxypropyl-glucosinolate.
AT4G04040	MEE51	0.586803	0.614242	0.479629	0.551132	0.0460528	0.0524543	0.0966449	0.0765937	825716	gene24281	NC_003075.7	1939113	1943024	3912	+	protein_coding	MEE51	.
AT5G14730	T9L3.30	2.89033	1.7447	2.63982	1.07943	0.0111769	0.0346183	0.0967371	0.49158	831325	gene31124	NC_003076.8	4756057	4757744	1688	+	protein_coding	T9L3.30	.
AT1G53540	F22G10.20	3.14342	1.0573	1.5916	3.49124	0.0431872	1	0.23752	0.128254	841789	gene6205	NC_003070.9	19980299	19981199	901	+	protein_coding	F22G10.20	.
AT1G53580	GLY3	3.14207	3.3862	1.79184	2.40803	0.0126934	0.0183109	0.172551	0.0421276	841793	gene6214	NC_003070.9	19991271	19993458	2188	-	protein_coding	GLY3	Mononuclear Fe(II)-containing member of the b-lactamase fold superfamily. ETHE1 is homodimeric in solution, exhibits low-level esterase activity, and specifically binds a single Fe(II) atom in the active site.
AT5G40010	AATP1	3.1409	2.69621	5.32827	1.68822	0.114963	0.0720578	0.317843	0.11593	833998	gene34282	NC_003076.8	16020058	16021916	1859	-	protein_coding	AATP1	Encodes a mitochondrial ATPase involved in seed and silique development.
AT2G07850	AT2G07850	3.13693	3.13244	0.934254	1.05822	0.0710885	0.0422996	1	0.563314	28717850	gene12664	NC_003071.7	9732464	9733623	1160	+	lncRNA	.	Natural antisense transcript overlaps with AT2G22850
AT4G17280	DL4675C	1.34295	1.28426	2.06716	1.65096	0.240003	0.199224	0.0969218	0.0550063	827442	gene26462	NC_003075.7	9678625	9680389	1765	-	protein_coding	DL4675C	.
AT3G48740	SWEET11	0.759548	0.925278	0.219036	0.414497	0.179179	0.67153	0.0969218	0.045748	824035	gene21730	NC_003074.8	18052466	18054832	2367	-	protein_coding	SWEET11	Encodes a member of the SWEET sucrose efflux transporter family proteins.
AT5G06885	AT5G06885	3.11949	2.10551	1.59323	0.714275	0.193878	0.321845	0.2259	0.7458	28720846	gene35221	NC_003076.8	19046652	19046919	268	-	lncRNA	.	.
AT2G28780	F8N16.7	0.368117	0.417237	0.316572	0.113086	0.0113893	0.0164941	0.0969358	0.0303974	817427	gene13452	NC_003071.7	12339851	12343443	3593	-	protein_coding	F8N16.7	.
AT2G16660	T24I21.7	3.1185	1.6534	1.74297	0.886406	0.0204251	0.138744	0.103156	0.24238	816167	gene11842	NC_003071.7	7218654	7221890	3237	-	protein_coding	T24I21.7	.
AT1G53633	AT1G53633	3.11552	2.16906	1.11693	0.667757	0.0561071	0.170482	0.734616	0.484167	7922339	gene6225	NC_003070.9	20017389	20017932	544	-	protein_coding	.	.
AT2G31083	CLE5	1.60151	1.53263	0.346066	0.877028	0.23162	0.231118	0.0974108	0.559131	817663	gene13744	NC_003071.7	13252076	13252914	839	+	protein_coding	CLE5	Member of a large family of putative ligands homologous to the Clavata3 gene. Consists of a single exon.
AT3G15518	AT3G15518	3.11092	5.20262	1.84038	1.28175	0.0459936	0.0970994	0.0906433	0.352051	6240745	gene17908	NC_003074.8	5249112	5249754	643	+	protein_coding	.	.
AT1G19610	PDF1.4	3.1108	3.18717	1.46971	1.95313	0.0788908	0.187751	0.306186	0.15216	838548	gene2452	NC_003070.9	6781483	6782216	734	-	protein_coding	PDF1.4	Predicted to encode a PR (pathogenesis-related) protein. Belongs to the plant defensin (PDF) family with the following members: At1g75830/PDF1.1, At5g44420/PDF1.2a, At2g26020/PDF1.2b, At5g44430/PDF1.2c, At2g26010/PDF1.3, At1g19610/PDF1.4, At1g55010/PDF1.5, At2g02120/PDF2.1, At2g02100/PDF2.2, At2g02130/PDF2.3, At1g61070/PDF2.4, At5g63660/PDF2.5, At2g02140/PDF2.6, At5g38330/PDF3.1 and At4g30070/PDF…
AT5G58120	K21L19.1	3.10433	3.40235	1.17129	0.953926	0.0281513	0.0310399	0.716181	0.712222	835924	gene36677	NC_003076.8	23517256	23521067	3812	+	protein_coding	K21L19.1	.
AT5G24600	K18P6.13	3.10342	2.6931	3.79558	2.72024	0.0317088	0.0450024	0.258127	0.074782	832531	gene32307	NC_003076.8	8421558	8423525	1968	-	protein_coding	K18P6.13	.
AT3G54680	AT3G54680	3.10212	2.53462	1.76402	2.28028	0.0104604	0.0337318	0.230292	0.046075	824633	gene22484	NC_003074.8	20244284	20246080	1797	+	protein_coding	.	.
AT5G45340	CYP707A3	3.10119	3.19301	0.50127	0.407212	0.0347292	0.0368072	0.172616	0.0439284	834570	gene35016	NC_003076.8	18368532	18371021	2490	-	protein_coding	CYP707A3	Encodes a protein with ABA 8'-hydroxylase activity; involved in ABA catabolism. Mutant analyses show that disruption in the gene results in more drought tolerance whereas overexpression results in increased transpiration rate and reduced drought tolerance. Gene involved in postgermination growth. Plant P450 CYP707A3, ABA 8'-hydroxylase, binds enantioselectively (+)-ABA but not (-)-ABA, whereas th…
AT3G26690	NUDX13	3.09913	2.42664	1.85528	2.10084	0.0339307	0.112355	0.145225	0.0226321	822281	gene19456	NC_003074.8	9804253	9805781	1529	-	protein_coding	NUDX13	Encodes AtNUDT13, a mitochondrial Nudix hydrolase specific for long-chain diadenosine polyphosphates.
AT5G28830	F7P1.10	3.09892	3.30249	1.40801	1.66323	0.0198034	0.0160828	0.349866	0.164498	833001	gene32960	NC_003076.8	10856661	10858687	2027	+	protein_coding	F7P1.10	.
AT5G51950	MSG15.3	3.09718	3.55678	0.99166	1.0083	0.054416	0.0562989	1	0.811452	835270	gene35881	NC_003076.8	21105909	21108710	2802	-	protein_coding	MSG15.3	.
AT4G07260	AT4G07260	3.09584	2.28577	1.4954	1.31215	0.0221513	0.453877	0.766948	0.686581	28719903	gene27438	NC_003075.7	12611571	12611780	210	+	lncRNA	.	Natural antisense transcript overlaps with AT4G24370
AT1G15100	RHA2A	3.09551	3.23642	1.64372	2.1029	0.0159163	0.0401228	0.0917269	0.121314	838073	gene1871	NC_003070.9	5193284	5194214	931	-	protein_coding	RHA2A	Encodes a putative RING-H2 finger protein RHA2a.
AT4G17650	DL4860W	3.09544	2.67289	1.67388	1.74302	0.0206391	0.0324742	0.107875	0.047427	827485	gene26511	NC_003075.7	9827467	9829768	2302	+	protein_coding	DL4860W	.
AT1G76690	OPR2	3.09138	3.16615	1.75379	1.31498	0.0196561	0.0278437	0.0942228	0.082701	844002	gene9137	NC_003070.9	28778622	28780483	1862	+	protein_coding	OPR2	Encodes one of the closely related 12-oxophytodienoic acid reductases. This enzyme is not expected to participate in jasmonic acid biosynthesis because during in vitro assays, it shows very little activity with the naturally occurring OPDA isomer. Shows activity towards 2,4,6-trinitrotoluene. Expressed predominately in root. Predicted to be a cytosolic protein.
AT5G01850	T20L15.120	3.08917	3.89521	2.16248	2.16958	0.0373415	0.0137479	0.179804	0.111885	831760	gene29596	NC_003076.8	332330	334543	2214	+	protein_coding	T20L15.120	.
AT1G66570	SUC7	3.08858	1.25723	1.01294	1.00015	0.0336608	0.0569236	0.734616	0.686581	842975	gene7841	NC_003070.9	24835244	24837441	2198	-	protein_coding	SUC7	.
AT5G46050	PTR3	3.08552	2.61047	2.34002	1.13093	0.0150602	0.0407036	0.171976	0.491982	834646	gene35105	NC_003076.8	18674968	18679191	4224	-	protein_coding	PTR3	Encodes a di- and tri-peptide transporter involved in responses to wounding, virulent bacterial pathogens, and high NaCl concentrations. The protein is predicted to have 12 transmembrane helicies.
AT1G07040	F10K1.25	3.0852	2.95414	1.85026	2.40013	0.0317578	0.0436311	0.30624	0.0261739	837215	gene805	NC_003070.9	2160919	2163387	2469	-	protein_coding	F10K1.25	.
AT3G48360	BT2	3.08514	1.50752	1.15424	1.68511	0.019063	0.0720781	0.978029	0.0383469	823994	gene21679	NC_003074.8	17907767	17910738	2972	-	protein_coding	BT2	encodes a protein (BT2) that is an essential component of the TAC1-mediated telomerase activation pathway. Acts redundantly with BT3 and BT1 during female gametophyte development and with BT3 during male gametophyte development. BT2 also mediates multiple responses to nutrients, stresses, and hormones.
AT5G56985	AT5G56985	5.72114	5.95567	3.41735	2.37192	0.0313054	0.0194405	0.0974495	0.0414411	28721274	gene36536	NC_003076.8	23056476	23056904	429	+	protein_coding	.	.
AT4G26220	caffeoyl coenzyme A ester O-methyltransferase 7	0.583867	0.729839	0.467615	0.512636	0.0147473	0.0447225	0.0976451	0.0557458	828728	gene27672	NC_003075.7	13283526	13285323	1798	+	protein_coding	caffeoyl coenzyme A ester O-methyltransferase 7	Encodes a caffeoyl-coenzyme A O-methyltransferase (CCoAOMT)-like protein with a strong preference for methylating the para position of flavanones and dihydroflavonols, whereas flavones and flavonols are methylated in the meta-position.
AT5G64310	AGP1	3.07414	3.39713	1.58173	1.41583	0.0221941	0.0310652	0.314641	0.0891577	836552	gene37433	NC_003076.8	25721733	25722678	946	+	protein_coding	AGP1	Encodes arabinogalactan-protein (AGP1).
AT5G53050	MNB8.11	3.07397	3.20555	1.97652	1.47971	0.0205079	0.0215804	0.174164	0.0675743	835385	gene36024	NC_003076.8	21510095	21513620	3526	-	protein_coding	MNB8.11	.
AT1G05680	UGT74E2	30.4218	16.9379	3.05986	4.50027	0.014208	0.012701	0.0979357	0.0203766	837075	gene624	NC_003070.9	1703002	1704838	1837	-	protein_coding	UGT74E2	Encodes a UDP-glucosyltransferase, UGT74E2, that acts on IBA (indole-3-butyric acid) and affects auxin homeostasis. The transcript and protein levels of this enzyme are strongly induced by H2O2 and may allow integration of ROS (reactive oxygen species) and auxin signaling. This enzyme can also transfer glycosyl groups to several compounds related to the explosive TNT when this synthetic compound …
AT5G01340	mSFC1	3.07317	1.86582	1.46584	1.02989	0.0137186	0.160822	0.19942	0.859353	831479	gene29528	NC_003076.8	143055	144863	1809	-	protein_coding	mSFC1	.
AT1G53170	ERF8	3.06975	4.73693	1.26772	1.73845	0.0144655	0.0137479	0.142542	0.0362735	841751	gene6157	NC_003070.9	19821337	19822399	1063	-	protein_coding	ERF8	encodes a member of the ERF (ethylene response factor) subfamily B-1 of ERF/AP2 transcription factor family (ATERF-8). The protein contains one AP2 domain. There are 15 members in this subfamily including ATERF-3, ATERF-4, ATERF-7, and leafy petiole.
AT1G44350	ILL6	10.0108	9.76334	5.39148	3.14879	0.0125218	0.012701	0.0979357	0.0244981	841026	gene5216	NC_003070.9	16834210	16838562	4353	-	protein_coding	ILL6	encodes a protein similar to IAA amino acid conjugate hydrolase.
AT3G22250	AT3G22250	3.06677	2.10781	4.28463	1.85469	0.0307178	0.0201171	0.0530826	0.0420639	821795	gene18834	NC_003074.8	7867753	7870229	2477	+	protein_coding	.	.
AT4G34710	ADC2	6.37392	7.01786	3.21889	3.83631	0.00987685	0.0198275	0.0979357	0.0525633	829623	gene28780	NC_003075.7	16560030	16563044	3015	-	protein_coding	ADC2	encodes a arginine decarboxylase (ADC), a rate-limiting enzyme that catalyzes the first step of polyamine (PA) biosynthesis via ADC pathway in Arabidopsis thaliana. Arabidopsis genome has two ADC paralogs, ADC1 and ADC2. ADC2 is stress-inducible (osmotic stress). Double mutant analysis showed that ADC genes are essential for the production of PA, and are required for normal seed development. Over…
AT5G07330	T2I1.40	3.06429	3.74392	10.7252	23.5621	0.0332497	0.0555523	0.166696	0.0291352	830624	gene30294	NC_003076.8	2315947	2316874	928	+	protein_coding	T2I1.40	.
AT3G28600	AT3G28600	5.94473	6.35039	13.8137	5.28209	0.0836854	0.0256634	0.0979357	0.101259	822490	gene19747	NC_003074.8	10722394	10723995	1602	+	protein_coding	.	.
AT3G05820	INVH	3.06372	2.43034	1.83442	1.96814	0.0200004	0.039304	0.387524	0.0955804	819751	gene16659	NC_003074.8	1732988	1735765	2778	-	protein_coding	INVH	Encodes a putative plastid-targeted alkaline/neutral invertase.
AT2G33830	AtDRM2	0.912302	1.29725	0.499305	0.977036	0.476045	0.137641	0.0979357	0.842506	817950	gene14107	NC_003071.7	14308754	14310608	1855	-	protein_coding	AtDRM2	.
AT4G17840	T6K21.20	3.05503	2.52907	2.06952	2.68542	0.0131198	0.0326462	0.299645	0.0523708	827507	gene26536	NC_003075.7	9918052	9920511	2460	-	protein_coding	T6K21.20	.
AT4G15100	scpl30	3.05429	3.87507	5.31684	3.26545	0.0513539	0.0463092	0.185025	0.114613	827176	gene26137	NC_003075.7	8625830	8629620	3791	+	protein_coding	scpl30	.
AT2G28500	LBD11	3.04886	2.98501	1.16163	1.35901	0.01107	0.0383931	0.995111	0.218584	817398	gene13415	NC_003071.7	12186274	12188293	2020	-	protein_coding	LBD11	.
AT3G08720	S6K2	3.04064	4.12036	1.12546	0.768785	0.0182021	0.0164645	0.240265	0.0722196	820019	gene16985	NC_003074.8	2648372	2651231	2860	-	protein_coding	S6K2	Encodes a ribosomal-protein S6 kinase. Gene expression is induced by cold and salt (NaCl). Activation of AtS6k is regulated by 1-naphthylacetic acid and kinetin, at least in part, via a lipid kinase-dependent pathway. Phosphorylates specifically mammalian and plant S6 at 25 degrees C but not at 37 degrees C. Involved in translational up-regulation of ribosomal proteins.
AT3G53100	AT3G53100	0.844311	0.936292	0.49866	0.659668	0.161791	0.635473	0.0979357	0.0510923	824476	gene22296	NC_003074.8	19684686	19686984	2299	-	protein_coding	.	.
AT3G10815	AT3G10815	3.03688	3.54243	1.64563	1.64508	0.0199612	0.0282479	0.0755535	0.0931697	2745878	gene17255	NC_003074.8	3384807	3386533	1727	-	protein_coding	.	.
AT3G02990	HSFA1E	3.03536	2.63297	4.22934	4.52591	0.0280062	0.0356895	0.0530826	0.0490687	821162	gene16281	NC_003074.8	673428	676428	3001	+	protein_coding	HSFA1E	member of Heat Stress Transcription Factor (Hsf) family
AT5G47640	NF-YB2	3.03333	3.39474	1.31804	2.00055	0.0243816	0.0155084	0.0979357	0.140096	834815	gene35314	NC_003076.8	19309227	19310272	1046	+	protein_coding	NF-YB2	.
AT5G16080	CXE17	3.02601	3.71766	1.77127	1.58311	0.0389202	0.0334669	0.446568	0.093792	831465	gene31302	NC_003076.8	5252251	5253790	1540	-	protein_coding	CXE17	.
AT4G23510	F16G20.210	0.569674	0.732983	0.379445	0.378655	0.0509898	0.121411	0.0979357	0.0531359	828451	gene27311	NC_003075.7	12267516	12270739	3224	-	protein_coding	F16G20.210	.
AT5G05305	AT5G05305	3.022	4.81165	0.448525	0.506567	0.0583666	0.0409605	0.0770761	0.091699	28720713	gene33674	NC_003076.8	13987661	13988620	960	+	misc_RNA	.	.
AT1G55920	SERAT2%3B1	3.02143	2.74396	1.78866	2.01335	0.0180268	0.019705	0.175497	0.0362015	842043	gene6535	NC_003070.9	20912116	20913565	1450	+	protein_coding	SERAT2;1	Encodes a chloroplast/cytosol localized serine O-acetyltransferase involved in sulfur assimilation and cysteine biosynthesis. Expressed in the vascular system.
AT2G14210	AGL44	0.533866	0.565521	0.204122	0.246661	0.024009	0.0301165	0.0979357	0.0357077	815907	gene11474	NC_003071.7	6018558	6023863	5306	+	protein_coding	AGL44	MADS box gene, transcription factor
AT4G07275	AT4G07275	3.01867	2.66544	4.91145	2.42305	0.0283874	0.0578149	0.270395	0.103951	28719906	gene27457	NC_003075.7	12662029	12662344	316	-	lncRNA	.	Natural antisense transcript overlaps with AT4G24510
AT3G02550	LBD41	0.170403	0.183717	0.304245	0.543575	0.0142785	0.01749	0.0979518	0.077663	821112	gene16220	NC_003074.8	536500	538126	1627	-	protein_coding	LBD41	.
AT3G20500	PAP18	3.01323	3.47375	1.46846	1.45449	0.03479	0.0198755	0.176155	0.0669395	821596	gene18575	NC_003074.8	7157900	7160446	2547	+	protein_coding	PAP18	.
AT3G46230	HSP17.4	3.01249	0.839595	0.831916	4.2508	0.205775	0.560527	0.233845	0.0345606	823768	gene21361	NC_003074.8	16984118	16984867	750	-	protein_coding	HSP17.4	member of the class I small heat-shock protein (sHSP) family, which accounts for the majority of sHSPs in maturing seeds
AT5G09530	PELPK1	3.01223	2.73232	1.78759	2.28726	0.0159163	0.022938	0.231245	0.0389694	830812	gene30521	NC_003076.8	2959734	2961382	1649	-	protein_coding	PELPK1	The gene encodes a unique protein which contains 36 repeats of a unique pentapeptide (Pro-Glu-Leu|Ile|Val-Pro-Lys). It has been shown tobe involved in growth and development.
AT3G46900	COPT2	0.256357	0.2314	0.250279	0.0977895	0.0300759	0.0332064	0.0979612	0.0263564	823843	gene21468	NC_003074.8	17268700	17269510	811	+	protein_coding	COPT2	encodes a member of copper transporter family and functionally complements a high affinity copper transporter mutant in yeast
AT4G24410	T22A6.240	3.00857	2.62573	6.86089	8.56583	0.0734639	0.0925232	0.260914	0.0500939	828543	gene27442	NC_003075.7	12623530	12624039	510	-	protein_coding	T22A6.240	.
AT4G12410	SAUR35	3.00658	4.73246	3.8677	8.12329	0.055077	0.029918	0.24845	0.0643558	826850	gene25702	NC_003075.7	7342800	7343731	932	-	protein_coding	SAUR35	.
AT5G41750	MUF8.3	3.00272	3.40013	0.669969	0.291934	0.0833655	0.0456798	0.0612868	0.0336269	834178	gene34505	NC_003076.8	16693832	16699028	5197	+	protein_coding	MUF8.3	.
AT1G63090	PP2-A11	3.00143	3.42728	1.2395	1.00224	0.0139705	0.0313288	0.672807	1	842612	gene7381	NC_003070.9	23390968	23392873	1906	-	protein_coding	PP2-A11	.
AT2G31380	STH	2.99656	2.53669	0.849622	1.77538	0.0215604	0.0257153	0.734616	0.0431343	817696	gene13780	NC_003071.7	13381767	13383470	1704	+	protein_coding	STH	a B-box zinc finger protein that interacts with COP1. contains a novel 11 amino acid motif at the C-terminus (also found at the N-terminus of HY5) that is involved in the COP1 interaction.
AT1G19670	CLH1	2.99435	4.10693	1.39834	1.32464	0.0169716	0.0199446	0.165763	0.593253	838554	gene2458	NC_003070.9	6803486	6805092	1607	-	protein_coding	CLH1	Chlorophyllase is the first enzyme involved in chlorophyll degradation. It catalyzes the hydrolysis of the ester bond to yield chlorophyllide and phytol. AtCLH1 lacks a typical signal sequence for the chloroplast. Its expression is induced rapidly by methyljasmonate, a known promoter of senescence and chlorophyll degradation.
AT1G66090	F15E12.17	2.99258	4.98597	1.71531	1.10626	0.0249149	0.0215484	0.13745	0.487654	842923	gene7778	NC_003070.9	24602033	24604763	2731	+	protein_coding	F15E12.17	.
AT1G62300	WRKY6	5.23305	5.04772	2.57476	2.11444	0.0152407	0.0137479	0.0980593	0.0531821	842527	gene7264	NC_003070.9	23016569	23019494	2926	-	protein_coding	WRKY6	Encodes a transcription factor WRKY6. Regulates Phosphate1 (Pho1) expression in response to low phosphate (Pi) stress.
AT1G65730	YSL7	2.99238	2.37275	1.12858	0.811272	0.0214271	0.0298278	0.805234	0.271626	842884	gene7729	NC_003070.9	24442388	24446291	3904	+	protein_coding	YSL7	Arabidopsis thaliana metal-nicotianamine transporter YSL4
AT2G26370	T9J22.4	2.99186	3.07582	1.75753	1.19534	0.086313	0.147745	0.115025	0.362315	817177	gene13147	NC_003071.7	11224565	11226235	1671	+	protein_coding	T9J22.4	.
AT1G63180	UGE3	2.99008	2.00408	1.76029	2.67493	0.0158481	0.0573884	0.288987	0.0614144	842622	gene7394	NC_003070.9	23427405	23429652	2248	-	protein_coding	UGE3	Encodes a protein with UDP-D-glucose 4-epimerase activity. Involved in pollen development.
AT3G08170	AT3G08170	2.98976	3.76395	1.89588	1.20206	0.0535913	0.095055	0.524599	0.871024	28719075	gene22014	NC_003074.8	18935873	18938239	2367	-	antisense_RNA	.	Natural antisense transcript overlaps with AT3G50950
AT5G38530	TSBtype2	2.98957	2.18156	1.41486	1.39163	0.0129068	0.0470766	0.194049	0.263487	833841	gene34075	NC_003076.8	15423980	15426576	2597	+	protein_coding	TSBtype2	TSBtype2 encodes a type 2 tryptophan synthase beta subunit that catalyzes a condensation reaction between serine and indole to generate tryptophan.It appears to form a homodimer. Its biological role has not yet been determined, but it has a very high affinity for indole which may be involved in allowing TSBtype2 to carefully limit free indole build-up. But, to date no overall change in plant morp…
AT1G20630	CAT1	1.30758	1.49683	2.46053	2.6903	0.0381498	0.0338386	0.0980742	0.0106339	838652	gene2574	NC_003070.9	7146636	7150180	3545	+	protein_coding	CAT1	Catalyzes the reduction of hydrogen peroxide using heme group as cofactor. Protects cells from toxicity by H2O2.
AT5G08130	BIM1	2.98431	2.38227	1.53588	1.85289	0.0161211	0.029035	0.144852	0.0647332	830708	gene30392	NC_003076.8	2606002	2610250	4249	-	protein_coding	BIM1	Encodes a basic helix-loop-helix (bHLH) family protein BIM1 (BES1-INTERACTING MYC-LIKE 1), involved in brassinosteroid signaling. It synergistically interacts with BES1 to bind to E box sequences (CANNTG). Positively modulates the shade avoidance syndrome in Arabidopsis seedlings.
AT2G22500	UCP5	3.67103	5.7626	2.30037	1.4934	0.0182965	0.0335898	0.098108	0.0918608	816783	gene12620	NC_003071.7	9562774	9564850	2077	-	protein_coding	UCP5	Encodes one of the mitochondrial dicarboxylate carriers (DIC): DIC1 (AT2G22500), DIC2 (AT4G24570), DIC3 (AT5G09470).
AT3G21240	4CL2	1.52876	1.83205	2.01982	2.16004	0.0836357	0.0251945	0.0984008	0.023605	821678	gene18677	NC_003074.8	7454269	7457404	3136	-	protein_coding	4CL2	encodes an isoform of 4-coumarate:CoA ligase (4CL), which is involved in the last step of the general phenylpropanoid pathway. The catalytic efficiency was in the following (descending) order: p-coumaric acid, caffeic acid, ferulic acid, 5-OH-ferulic acid and cinnamic acid. At4CL2 was unable to use sinapic acid as substrate.
AT1G22190	F16L1.8	2.98085	3.35683	1.08039	1.10564	0.0149784	0.0215804	0.767566	0.150687	838824	gene2797	NC_003070.9	7835781	7837411	1631	+	protein_coding	F16L1.8	The gene encodes a putative transcription factor belongings to the abiotic stress-associated DREB A-6 clade.
AT4G30170	F9N11.20	0.520281	0.645515	0.316693	0.36004	0.0104604	0.013153	0.0987519	0.0337344	829140	gene28193	NC_003075.7	14762819	14764636	1818	+	protein_coding	F9N11.20	.
AT3G15578	AT3G15578	2.97322	0.998751	0.814482	0.413322	0.208909	0.453877	1	0.686581	6240768	gene17920	NC_003074.8	5273691	5273873	183	+	protein_coding	.	.
AT4G27260	WES1	1.6851	1.52587	3.14147	2.64546	0.0308403	0.0335898	0.0988608	0.0258073	828834	gene27814	NC_003075.7	13653579	13656285	2707	+	protein_coding	WES1	encodes an IAA-amido synthase that conjugates Asp and other amino acids to auxin in vitro. Lines carrying insertions in this gene are hypersensitive to auxin. It is involved in camalexin biosynthesis via conjugating indole-3-carboxylic acid (ICA) and cysteine (Cys).
AT3G03341	AT3G03341	31.9607	36.5629	25.027	47.4855	0.0339242	0.031756	0.0989016	0.0261739	6240770	gene16320	NC_003074.8	790130	790693	564	-	protein_coding	.	.
AT2G33590	CRL1	2.96655	2.58293	1.16977	1.07965	0.015304	0.0247083	0.172616	0.0505146	817925	gene14067	NC_003071.7	14224268	14226636	2369	+	protein_coding	CRL1	Encodes a protein with homology to members of the dihydroflavonol-4-reductase (DFR) superfamily. The expression pattern of AtCRL1 indicates that CRL1 has a role in embryogenesis and seed germination. AtCRL1 is induced by ABA, drought and heat, and is highly expressed in seeds.
AT4G12290	T4C9.130	2.96655	2.27527	1.33256	1.72817	0.0175851	0.0849135	0.172339	0.0658639	826838	gene25686	NC_003075.7	7303985	7307237	3253	+	protein_coding	T4C9.130	.
AT2G31560	T9H9.8	2.962	2.05401	1.50535	2.27248	0.0198182	0.0371137	0.149517	0.303147	817714	gene13801	NC_003071.7	13436485	13438011	1527	+	protein_coding	T9H9.8	.
AT5G57900	SKIP1	2.96143	2.8824	1.70285	2.71666	0.0272703	0.0601054	0.220728	0.0293312	835901	gene36652	NC_003076.8	23449694	23450933	1240	-	protein_coding	SKIP1	F-box protein, interacts with SKP1/ASK1 subunit of SCF ubiquitin ligase in a glucose-dependent manner
AT1G78380	GSTU19	2.95927	2.39953	1.40332	1.23756	0.0196828	0.0241653	0.0969861	0.135628	844174	gene9372	NC_003070.9	29486387	29488007	1621	-	protein_coding	GSTU19	Encodes a glutathione transferase that is a member of Tau GST gene family. Expression is induced by drought stress, oxidative stress, and high doses of auxin and cytokinin. naming convention according to Wagner et al. (2002) The expression of this gene is upregulated by herbicide safeners such as benoxacor and fenclorim.
AT1G73480	T9L24.33	22.5227	17.2097	5.77693	8.31775	0.00727741	0.0122452	0.0989016	0.0420639	843683	gene8731	NC_003070.9	27628678	27632840	4163	+	protein_coding	T9L24.33	.
AT1G27910	PUB45	2.95444	2.77073	1.8825	1.45668	0.0382028	0.0137747	0.31916	0.228257	839684	gene3443	NC_003070.9	9720733	9724800	4068	-	protein_coding	PUB45	Encodes a protein containing a UND, a U-box, and an ARM domain. This protein has E3 ubiquitin ligase activity based on in vitro assays.
AT2G17120	LYM2	2.95342	2.84215	1.4428	1.252	0.0157059	0.0352262	0.23752	0.42504	816217	gene11907	NC_003071.7	7458930	7460819	1890	+	protein_coding	LYM2	Induction of chitin-responsive genes by chitin treatment is not blocked in the mutant.
AT3G57020	AT3G57020	4.52652	4.27843	2.69261	2.91962	0.0113505	0.0168402	0.0989016	0.067895	824869	gene22791	NC_003074.8	21098315	21100519	2205	-	protein_coding	.	.
AT1G19210	T29M8.8	2.94752	1.96898	1.22875	2.00189	0.23875	0.0499307	0.731203	0.0384222	838504	gene2396	NC_003070.9	6626794	6627688	895	-	protein_coding	T29M8.8	encodes a member of the DREB subfamily A-5 of ERF/AP2 transcription factor family. The protein contains one AP2 domain. There are 15 members in this subfamily including RAP2.1, RAP2.9 and RAP2.10.
AT1G02460	T6A9.22	2.94157	3.95404	0.554273	0.654289	0.0469485	0.0494959	0.172301	0.172035	839443	gene192	NC_003070.9	504463	507268	2806	-	protein_coding	T6A9.22	.
AT1G69360	F10D13.5	2.94116	2.38164	1.82698	2.26801	0.0245452	0.030894	0.190733	0.0462526	843268	gene8214	NC_003070.9	26072284	26076374	4091	-	protein_coding	F10D13.5	.
AT2G40435	T2P4.23	2.93933	2.04964	1.0758	1.04593	0.031328	0.040565	0.27464	0.0292179	818637	gene14976	NC_003071.7	16886767	16889243	2477	+	protein_coding	T2P4.23	.
AT1G67810	SUFE2	2.93566	2.98054	1.4304	1.76352	0.00745212	0.020028	0.160379	0.0294258	843107	gene8010	NC_003070.9	25426234	25427461	1228	+	protein_coding	SUFE2	Encodes a protein capable of stimulating the cysteine desulfurase activity of CpNifS (AT1G08490) in vitro. SufE2:GFP localizes to the chloroplasts where it is likely to play a role in iron-sulfur cluster assembly. Transcript levels for this gene are high in the pollen relative to other organs based on RT-PCR analysis.
AT5G13580	ABCG6	3.57614	3.40181	2.56356	2.61066	0.0162187	0.020028	0.0989016	0.0435569	831202	gene30980	NC_003076.8	4370692	4373201	2510	+	protein_coding	ABCG6	Belongs to a clade of five Arabidopsis thaliana ABCG half-transporters that are required for synthesis of an effective suberin barrier in roots and seed coats (ABCG2, ABCG6, and ABCG20) and for synthesis of an intact pollen wall (ABCG1 and ABCG16).
AT1G02920	GSTF7	2.93279	6.42605	1.38499	1.25969	0.0335424	0.0122452	0.718353	0.213934	839295	gene252	NC_003070.9	658578	659980	1403	-	protein_coding	GSTF7	Encodes glutathione transferase belonging to the phi class of GSTs. Naming convention according to Wagner et al. (2002).
AT1G75000	F25A4.4	2.93082	3.17157	1.21587	0.827927	0.0334051	0.0353881	0.288102	0.180767	843838	gene8927	NC_003070.9	28163344	28164814	1471	+	protein_coding	F25A4.4	.
AT3G47210	AT3G47210	0.927488	1.03928	0.458299	0.367831	0.775268	1	0.0989016	0.041385	823874	gene21512	NC_003074.8	17385161	17387244	2084	+	protein_coding	.	.
AT4G37700	T28I19.2	2.92578	2.1886	1.02077	0.833716	0.0181791	0.0598975	1	0.128746	829925	gene29163	NC_003075.7	17710182	17711031	850	-	protein_coding	T28I19.2	.
AT3G07090	AT3G07090	2.92395	2.70416	1.01507	1.70847	0.0114775	0.0269225	1	0.0696752	819895	gene16840	NC_003074.8	2242998	2244828	1831	-	protein_coding	.	.
AT1G23040	F19G10.19	2.92319	3.23835	1.78421	2.02623	0.0367922	0.022938	0.114444	0.051504	838912	gene2896	NC_003070.9	8164782	8166716	1935	+	protein_coding	F19G10.19	.
AT2G35935	AT2G35935	2.91848	4.45322	0.916486	0.617698	0.287945	0.0243453	0.817568	0.0514569	28718330	gene14396	NC_003071.7	15083353	15084340	988	+	protein_coding	.	.
AT1G73530	T9L24.48	0.732965	0.621587	0.330935	0.224096	0.094895	0.0702601	0.0989016	0.0466292	843687	gene8736	NC_003070.9	27643609	27645525	1917	-	protein_coding	T9L24.48	.
AT3G23800	SBP3	0.620392	0.77249	0.402796	0.427047	0.0286809	0.0939679	0.0989016	0.0366825	821962	gene19056	NC_003074.8	8581446	8583987	2542	+	protein_coding	SBP3	.
AT5G01880	DAF-Like gene 2	2.91086	2.31934	2.59783	3.58226	0.0307314	0.0472826	0.126014	0.193077	831691	gene29599	NC_003076.8	338896	340253	1358	+	protein_coding	DAF-Like gene 2	.
AT5G20230	BCB	27.4868	34.8912	7.25141	4.28621	0.0112683	0.0268261	0.099094	0.0179337	832145	gene31827	NC_003076.8	6826365	6827748	1384	+	protein_coding	BCB	Al-stress-induced gene
AT4G19700	RING	2.90571	2.3571	1.68314	2.2902	0.0180656	0.0404706	0.256364	0.0251739	827714	gene26799	NC_003075.7	10713410	10714745	1336	-	protein_coding	RING	Encodes BOI (Botrytis Susceptible 1 Interactor). Has E3 ubiquitin ligase activity. Interacts with and ubiquitinates BOS1 (Botrytis Susceptible 1). It prevents caspase activation and attenuates cell death.
AT4G27350	F27G19.7	2.90554	3.56228	1.44024	1.51304	0.02245	0.0151487	0.231185	0.0718267	828843	gene27824	NC_003075.7	13690645	13692832	2188	-	protein_coding	F27G19.7	.
AT3G46640	PCL1	1.21191	1.07563	2.35774	2.34165	0.0430793	0.037153	0.029094	0.0387517	823817	gene21432	NC_003074.8	17183042	17186959	3918	+	protein_coding	PCL1	Encodes a myb family transcription factor with a single Myb DNA-binding domain (type SHAQKYF) that is unique to plants and is essential for circadian rhythms, specifically for transcriptional regulation within the circadian clock. LUX is required for normal rhythmic expression of multiple clock outputs in both constant light and darkness. It is coregulated with TOC1 and seems to be repressed by C…
AT4G22758	AT4G22758	2.90236	2.86181	1.26938	0.96248	0.0209455	0.0723897	0.221726	0.88379	10723027	gene27218	NC_003075.7	11958128	11960071	1944	+	protein_coding	.	.
AT5G50915	AT5G50915	2.90146	2.38064	1.00204	0.996062	0.0623927	0.0630703	1	1	835164	gene35753	NC_003076.8	20710103	20712473	2371	-	protein_coding	.	.
AT1G30720	T5I8.17	2.89929	3.86871	0.884	0.616434	0.0468917	0.0219179	0.409059	0.0864636	839952	gene3823	NC_003070.9	10897925	10899975	2051	+	protein_coding	T5I8.17	.
AT1G72070	F28P5.5	2.89868	3.14576	2.06278	1.96316	0.0305045	0.0137479	0.14136	0.0736145	843538	gene8559	NC_003070.9	27118621	27119918	1298	-	protein_coding	F28P5.5	.
AT4G39950	CYP79B2	2.89865	3.28	1.33486	1.70989	0.0189449	0.0183754	0.194872	0.0415343	830154	gene29450	NC_003075.7	18525042	18527602	2561	+	protein_coding	CYP79B2	Belongs to cytochrome P450 and is involved in tryptophan metabolism. Converts Trp to indo-3-acetaldoxime (IAOx), a precursor to IAA and indole glucosinolates.
AT1G75750	GASA1	0.681315	0.900438	0.308345	0.416634	0.128732	0.544608	0.099094	0.041076	843908	gene9021	NC_003070.9	28441501	28442435	935	-	protein_coding	GASA1	GA-responsive GAST1 protein homolog regulated by BR and GA antagonistically. Possibly involved in cell elongation based on expression data
AT4G26150	CGA1	2.89777	3.16505	1.03556	1.00447	0.0316664	0.0183802	0.951246	1	828721	gene27665	NC_003075.7	13253084	13255106	2023	+	protein_coding	CGA1	Encodes a member of the GATA factor family of zinc finger transcription factors. Modulate chlorophyll biosynthesis and glutamate synthase (GLU1/Fd-GOGAT) expression.
AT1G66100	F15E12.20	2.89501	5.54308	1.00487	1.00133	0.0196703	0.0173949	0.734616	0.686581	842924	gene7780	NC_003070.9	24605538	24606722	1185	-	protein_coding	F15E12.20	Predicted to encode a PR (pathogenesis-related) protein. Belongs to the plant thionin (PR-13) family with the following members: At1g66100, At5g36910, At1g72260, At2g15010, At1g12663, At1g12660.
AT3G26744	ICE1	1.27026	1.05336	2.95492	3.51623	0.0714926	0.457448	0.0991181	0.0339172	822287	gene19463	NC_003074.8	9832667	9835279	2613	-	protein_coding	ICE1	Encodes a MYC-like bHLH transcriptional activator that binds specifically to the MYC recognition sequences in the CBF3 promoter. Mutants are defective in cold-regulated gene expression. Cold stress triggers protein degradation of nuclear GFPICE1 protein, and the RING finger protein HOS1 is required. Sumoylation of ICE1 controls CBF3/DREB1A expression and freezing tolerance.
AT4G24570	DIC2	2.88808	4.50973	1.16509	0.973669	0.0550298	0.0173052	0.2325	0.712524	828559	gene27464	NC_003075.7	12686459	12687650	1192	+	protein_coding	DIC2	Encodes one of the mitochondrial dicarboxylate carriers (DIC): DIC1 (AT2G22500), DIC2 (AT4G24570), DIC3 (AT5G09470).
AT4G35550	WOX13	2.88663	3.29725	1.91786	2.41689	0.020942	0.0460489	0.363558	0.0315706	829707	gene28887	NC_003075.7	16875521	16877451	1931	-	protein_coding	WOX13	Encodes a WUSCHEL-related homeobox gene family member with 65 amino acids in its homeodomain. WOX13 is the only family member that does not contain a sequence of eight residues (TLPLFPMH) downstream of the homeodomain called the WUS box.
AT2G22121	LCR35	2.8808	1.28472	2.85284	5.53839	0.278554	0.672216	0.734616	0.140321	3768634	gene12560	NC_003071.7	9397864	9398259	396	+	protein_coding	LCR35	Encodes a member of a family of small,secreted, cysteine rich protein with sequence similarity to the PCP (pollen coat protein) gene family.
AT2G47190	MYB2	2.8805	3.87609	3.81348	3.11825	0.017187	0.0709997	0.169285	0.0469628	819332	gene15891	NC_003071.7	19375985	19377543	1559	+	protein_coding	MYB2	Encodes a MYB transcription factor that possesses an R2R3 MYB DNA binding domain and is known to regulate the expression of salt- and dehydration-responsive genes. Has been shown to bind calmodulin.
AT3G54510	AT3G54510	2.87926	2.56305	0.801104	0.844722	0.063494	0.0402576	0.418448	0.335609	824616	gene22465	NC_003074.8	20180007	20183588	3582	+	protein_coding	.	.
AT1G72450	JAZ6	2.87664	3.39869	1.0628	0.720689	0.0232838	0.0155084	0.932471	0.188825	843577	gene8603	NC_003070.9	27273968	27276562	2595	-	protein_coding	JAZ6	JAZ6 transcript levels rise in response to a jasmonate stimulus and a GFP:JAZ6 fusion protein localizes to the nucleus. Application of jasmonate methyl ester to Arabidopsis roots reduces the levels of a JAZ6:GUS fusion protein, presumably by stimulating ubiquitin-proteasome-mediated degradation.
AT2G18323	AT2G18323	2.87597	2.19825	2.81766	1.53835	0.452561	0.67153	0.447858	0.686581	7922287	gene12064	NC_003071.7	7960352	7960564	213	+	transcribed_pseudogene	.	Pseudogene of ATMG00450
AT1G04267	AT1G04267	2.87481	0.368009	3.503	1.00052	0.420024	0.67153	0.734616	0.686581	28716085	gene455	NC_003070.9	1216552	1216691	140	+	snoRNA	.	AtsnoR155a
AT1G04303	AT1G04303	2.87248	1.83035	0.792244	0.805244	0.482211	0.828403	1	1	28716092	gene511	NC_003070.9	1388988	1389225	238	+	lncRNA	.	Natural antisense transcript overlaps with AT1G04910
AT1G14860	NUDT18	3.17014	3.19147	2.02885	2.37736	0.016373	0.0530305	0.100156	0.0417155	838051	gene1839	NC_003070.9	5124670	5126280	1611	+	protein_coding	NUDT18	.
AT4G35110	T12J5.14	2.87119	5.23944	1.88843	1.79745	0.0269096	0.0356396	0.18356	0.0882665	829663	gene28829	NC_003075.7	16712280	16715114	2835	-	protein_coding	T12J5.14	.
AT1G74100	SOT16	2.86906	3.44727	1.57408	1.60639	0.015304	0.0182808	0.14653	0.0233633	843750	gene8810	NC_003070.9	27864345	27865694	1350	-	protein_coding	SOT16	encodes a desulfoglucosinolate sulfotransferase, involved in the final step of glucosinolate core structure biosynthesis. Has a broad-substrate specificity with different desulfoglucosinolates, the best substrate is indole-3-methyl-dsGS, followed by benzyl-dsGS. Expression was induced by wounding, jasmonate and ethylene stimulates.
AT4G31840	ENODL15	0.37396	0.429395	0.320272	0.273765	0.0133278	0.0163625	0.100156	0.051396	829313	gene28407	NC_003075.7	15401640	15402629	990	+	protein_coding	ENODL15	.
AT1G59740	AtNPF4.3	2.86098	3.72354	1.64896	1.98343	0.0181791	0.0168628	0.224362	0.0892079	842267	gene6911	NC_003070.9	21967986	21972503	4518	+	protein_coding	AtNPF4.3	.
AT2G46150	T3F17.20	2.85999	2.8721	1.38938	0.794133	0.0370038	0.0164376	0.175916	0.129588	819222	gene15741	NC_003071.7	18961283	18962423	1141	+	protein_coding	T3F17.20	.
AT4G24510	CER2	2.85993	2.46092	3.99212	3.57093	0.0289181	0.0264227	0.119825	0.028221	828553	gene27456	NC_003075.7	12660687	12662656	1970	+	protein_coding	CER2	Encodes a component of the fatty acid elongation machinery required for C28 to C30 fatty acid elongation. It does not require the acyltransferase catalytic site for biological function.
AT2G30400	OFP2	2.85861	1.76289	2.14171	2.53955	0.0517894	0.0454977	0.0906433	0.0290377	817591	gene13651	NC_003071.7	12956445	12957807	1363	+	protein_coding	OFP2	.
AT3G49780	PSK4	2.85725	2.31764	1.02937	0.937647	0.0384158	0.033562	1	0.671411	824140	gene21862	NC_003074.8	18465318	18467224	1907	+	protein_coding	PSK4	Phytosulfokine 3 precursor, coding for a unique plant peptide growth factor. Plants overexpressing this gene (under a 35S promoter), develop normal cotyledons and hypocotyls but their growth, in particular that of their roots, was faster than that of wildtype.
AT1G12110	NRT1.1	0.496024	0.576865	0.431173	0.450781	0.0196875	0.0342222	0.100196	0.041076	837763	gene1479	NC_003070.9	4105223	4109601	4379	+	protein_coding	NRT1.1	Encodes NRT1.1 (CHL1), a dual-affinity nitrate transporter. The protein is expressed in guard cells and function in stomatal opening. Mutants have less transpiration and are more tolerant to drought. Expressed in lateral roots. Involved in nitrate signaling which enables the plant root system to detect and exploit nitrate-rich soil patches. Comparing to the wild type, the mutant displays a strong…
AT4G35190	LOG5	2.85481	4.54408	3.38956	4.59142	0.0882223	0.0209676	0.181781	0.0641983	829672	gene28842	NC_003075.7	16746189	16748455	2267	+	protein_coding	LOG5	.
AT4G34380	F10M10.150	2.85424	4.50157	5.24488	8.26547	0.0292707	0.0185923	0.167946	0.0253887	829588	gene28739	NC_003075.7	16438469	16440641	2173	+	protein_coding	F10M10.150	.
AT5G54080	HGO	2.85415	2.53474	1.31031	2.05115	0.0213525	0.0354436	0.195922	0.109929	835494	gene36158	NC_003076.8	21945865	21948913	3049	+	protein_coding	HGO	Encodes a homogentisate 1,2-dioxygenase that can convert homogentisate to malylacetoacetate and is likely to be involved in tyrosine catabolism.
AT3G14810	MSL5	2.85242	2.9691	3.40507	5.04108	0.0257468	0.0215484	0.0667448	0.0263564	820710	gene17809	NC_003074.8	4970944	4974534	3591	-	protein_coding	MSL5	.
AT3G10960	AZG1	4.17353	2.91923	4.77247	5.00082	0.014761	0.0230042	0.100441	0.0186347	820267	gene17271	NC_003074.8	3424813	3427058	2246	-	protein_coding	AZG1	Encodes a homolog of the adenine-guanine-hypoxanthine transporter AzgA of Aspergillus nidulans. Function as a plant adenine-guanine transporter. Two closely related genes exist in Arabidopsis: AT3G10960 (Azg1) and AT5G50300 (Azg2).
ArthCt088	trnH	2.84793	0.000853764	1.00583	1.00159	0.879787	0.67153	0.734616	0.686581	.	gene38182	NC_000932.1	4	76	73	-	tRNA	trnH	.
AT2G30250	WRKY25	2.84446	2.70857	1.02989	0.863311	0.0349981	0.0137479	1	0.125156	817575	gene13632	NC_003071.7	12903208	12905338	2131	-	protein_coding	WRKY25	member of WRKY Transcription Factor; Group I. Located in nucleus. Involved in response to various abiotic stresses - especially salt stress.
AT5G65380	MNA5.11	2.84343	2.30384	1.05109	0.862752	0.018304	0.0198275	1	0.182353	836663	gene37577	NC_003076.8	26122937	26126560	3624	-	protein_coding	MNA5.11	.
AT1G51700	DOF1	2.84305	3.58125	1.08445	1.06341	0.0175851	0.0270501	0.780252	0.686581	841595	gene5955	NC_003070.9	19173880	19175228	1349	+	protein_coding	DOF1	Encodes dof zinc finger protein (adof1).
AT1G20450	ERD10	17.4832	19.8851	5.08861	4.7452	0.023475	0.0140011	0.100596	0.0238406	838633	gene2552	NC_003070.9	7087903	7089606	1704	-	protein_coding	ERD10	Encodes a gene induced by low temperature and dehydration. Inhibits e.coli growth while overexpressed. Belongs to the dehydrin protein family, which contains highly conserved stretches of 7-17 residues that are repetitively scattered in their sequences, the K-, S-, Y- and lysine rich segments. LTI29 and LTI30 double overexpressors confer cold tolerance. Localized to membranes and cytoplasm.
AT5G08135	AT5G08135	2.84145	4.20292	2.06368	1.7982	0.140251	0.100057	0.685983	0.107416	28720951	gene36173	NC_003076.8	21985695	21986009	315	+	lncRNA	.	Natural antisense transcript overlaps with AT5G54170
AT5G54130	AT5G54130	2.84112	2.60254	1.74663	2.32566	0.0199342	0.0275251	0.106754	0.0428045	835500	gene36164	NC_003076.8	21962570	21965623	3054	+	protein_coding	.	.
AT5G54940	MBG8.21	2.83695	2.22308	1.03318	1.07287	0.0170561	0.0289855	0.798336	0.256722	835585	gene36272	NC_003076.8	22307982	22309453	1472	-	protein_coding	MBG8.21	.
AT3G05660	RLP33	2.83645	2.10474	1.05221	1.06137	0.0671668	0.0409656	0.263543	0.244336	819733	gene16628	NC_003074.8	1648843	1652149	3307	-	protein_coding	RLP33	.
AT5G23850	MRO11.11	2.83472	3.06253	2.59409	2.2067	0.0113893	0.0366531	0.0672752	0.0721039	832450	gene32205	NC_003076.8	8037798	8040941	3144	+	protein_coding	MRO11.11	.
AT5G64260	EXL2	2.83438	3.43046	1.28963	1.0462	0.0133278	0.0236876	0.475379	0.162444	836547	gene37428	NC_003076.8	25703649	25705339	1691	+	protein_coding	EXL2	.
AT2G04050	F3L12.12	2.83246	1.71802	2.03722	1.15323	0.058104	0.117134	0.247161	0.0248119	814939	gene10148	NC_003071.7	1337180	1339468	2289	-	protein_coding	F3L12.12	.
AT1G42990	BZIP60	2.83135	3.51034	1.92005	1.31277	0.0183551	0.0196235	0.260213	0.101366	840897	gene5050	NC_003070.9	16135723	16137463	1741	-	protein_coding	BZIP60	bZIP60 consists of a bZIP DNA binding domain followed by a putative transmembrane domain. bZIP60 mRNA is upregulated by the addition of ER stress inducers, tunicamycin (inhibitor of N-linked glycosylation), DTT (inhibitor of disulfide bond formation) and azetin-2-carboxylate (proline analog perturbing protein structure). Upon ER stress, bZIP60 mRNA is spliced by IRE1A and IRE1B to produce bZIP60-…
AT2G32140	F22D22.11	2.82962	2.73839	1.95346	1.13295	0.0287985	0.0431471	0.166734	0.682117	817773	gene13882	NC_003071.7	13655627	13657369	1743	-	protein_coding	F22D22.11	.
AT3G44550	FAR5	1.90238	1.56201	2.45513	1.7459	0.0369664	0.0490986	0.100596	0.0233633	823580	gene21101	NC_003074.8	16137576	16142270	4695	+	protein_coding	FAR5	Encodes a member of the eight-member gene family encoding alcohol-forming fatty acyl-CoA reductases (FARs) identified in Arabidopsis thaliana. Three of the FARs, FAR1 (At5g22500), FAR4 (At3g44540) and FAR5 (At3g44550), are shown to generate the fatty alcohols found in root, seed coat, and wound-induced leaf tissue.
AT3G43430	AT3G43430	2.82836	2.47816	1.15662	1.27828	0.0230408	0.0412719	0.705469	0.0483088	823423	gene20883	NC_003074.8	15354535	15355494	960	-	protein_coding	.	.
AT1G53730	SRF6	0.38616	0.412629	0.423723	0.488248	0.0393076	0.0442422	0.100617	0.0517275	841811	gene6245	NC_003070.9	20061405	20065713	4309	+	protein_coding	SRF6	.
AT1G71330	NAP5	2.8269	1.74073	1.20806	1.46384	0.022172	0.0411112	0.693646	0.219328	843474	gene8479	NC_003070.9	26884014	26885169	1156	-	protein_coding	NAP5	member of NAP subfamily
AT5G52660	F6N7.15	2.82628	2.90243	1.84719	2.37429	0.0302458	0.0128369	0.130085	0.0553402	835343	gene35973	NC_003076.8	21359001	21362273	3273	-	protein_coding	F6N7.15	.
AT1G79710	F19K16.31	2.82393	2.1458	1.37883	1.42582	0.0294836	0.0486149	0.279388	0.0738016	844310	gene9541	NC_003070.9	29994962	29997201	2240	+	protein_coding	F19K16.31	.
AT5G35660	MJE4.15	2.82068	0.976903	1.20212	1.033	0.0236251	0.67153	0.234101	0.686581	3771291	gene33634	NC_003076.8	13852387	13853742	1356	-	protein_coding	MJE4.15	.
AT2G41905	AT2G41905	2.81652	2.7719	0.587034	0.856632	0.0220311	0.0478026	0.507131	0.686581	2745590	gene15189	NC_003071.7	17495506	17496187	682	+	protein_coding	.	.
AT2G18680	MSF3.6	2.81475	2.49104	0.778534	0.570626	0.0662626	0.0601073	0.177024	0.0658096	816383	gene12102	NC_003071.7	8094614	8095779	1166	+	protein_coding	MSF3.6	.
AT2G27550	ATC	2.65708	2.35825	5.28494	8.22574	0.0391971	0.0814466	0.100787	0.0250184	817302	gene13300	NC_003071.7	11773187	11774746	1560	+	protein_coding	ATC	encodes a protein similar to TFL1. overexpression leads to similar phenotype as TFL1 overexpression. expressed specifically in the hypocotyl and null mutation does not result in phenotypes exhibited by TFL1 null mutations. It acts non-cell autonomously to inhibit floral initiation.
AT5G20900	JAZ12	2.81124	2.54583	1.4097	1.93289	0.0158481	0.0451597	0.734616	0.0342996	832214	gene31913	NC_003076.8	7090704	7092539	1836	+	protein_coding	JAZ12	.
AT1G72430	SAUR78	0.37596	0.482043	0.28639	0.148892	0.0317499	0.0498525	0.100787	0.0392495	843575	gene8601	NC_003070.9	27264602	27265806	1205	-	protein_coding	SAUR78	.
AT1G08230	AT1G08230	2.80781	2.95268	2.88332	4.19325	0.0296057	0.0242191	0.0874449	0.0348114	837344	gene968	NC_003070.9	2583594	2586969	3376	-	protein_coding	.	Codes for a H+-driven, high affinity gamma-aminobutyric acid (GABA) transporter. Localized at the plasma membrane. In planta, AtGAT1 expression was highest in flowers and under conditions of elevated GABA concentrations such as wounding or senescence.
AT4G35655	AT4G35655	2.80738	3.87399	1.65961	1.14739	0.0240739	0.0301488	0.138726	0.482934	28720208	gene28903	NC_003075.7	16910494	16911160	667	+	protein_coding	.	.
AT1G74790	F25A4.24	2.80715	2.14616	1.56109	1.26027	0.0139631	0.0216914	0.207481	0.15837	843818	gene8904	NC_003070.9	28098464	28101896	3433	+	protein_coding	F25A4.24	.
AT5G14840	T9L3.140	2.80466	2.13195	0.970895	0.94917	0.0219778	0.0260944	1	0.945181	3770643	gene31135	NC_003076.8	4798329	4800738	2410	-	transcribed_pseudogene	T9L3.140	pseudogene of unknown protein
AT4G15680	DL3880W	2.80249	2.63416	1.07579	0.549141	0.00960748	0.0637228	0.919967	0.0734045	827245	gene26218	NC_003075.7	8931617	8932317	701	+	protein_coding	DL3880W	.
AT4G20000	F18F4.100	2.80211	3.19864	1.40394	0.911652	0.0316774	0.0290478	0.448986	0.362398	827745	gene26838	NC_003075.7	10838310	10839335	1026	+	protein_coding	F18F4.100	.
AT5G44110	ABCI21	2.80053	3.13519	1.93759	1.65946	0.0304176	0.0301488	0.20467	0.0675238	834434	gene34836	NC_003076.8	17753959	17755768	1810	-	protein_coding	ABCI21	Encodes a member of the NAP subfamily of ABC transporters.
AT5G53750	MGN6.11	2.79943	3.06665	1.75435	0.843904	0.0171802	0.0277494	0.158573	0.0757676	835456	gene36106	NC_003076.8	21817128	21818958	1831	+	protein_coding	MGN6.11	.
AT3G01840	LYK2	2.79842	1.94113	0.627952	0.296929	0.0613898	0.0535126	0.165769	0.0304541	820047	gene16133	NC_003074.8	296582	298648	2067	-	protein_coding	LYK2	Encodes a LysM-containing receptor-like kinase. Induction of chitin-responsive genes by chitin treatment is not blocked in the mutant.
AT2G35930	PUB23	2.79624	4.4453	0.935789	0.652997	0.019647	0.0153952	0.119813	0.0251739	818166	gene14395	NC_003071.7	15082855	15084559	1705	-	protein_coding	PUB23	Encodes a cytoplasmically localized U-box domain containing E3 ubiquitin ligase that is involved in the response to water stress and acts as a negative regulator of PAMP-triggered immunity.
AT3G50760	GATL2	2.7959	3.73285	1.60017	1.50675	0.0282437	0.0229884	0.285134	0.126485	824240	gene21987	NC_003074.8	18867834	18869399	1566	+	protein_coding	GATL2	Encodes a protein with putative galacturonosyltransferase activity.
AT1G16515	AT1G16515	2.79435	2.38274	0.92268	1.80383	0.119078	0.204822	1	0.412718	28717243	gene2046	NC_003070.9	5647462	5648114	653	-	protein_coding	.	.
AT5G46710	MZA15.12	1.79905	1.68766	2.37135	1.98056	0.03213	0.0364899	0.101107	0.123664	834714	gene35191	NC_003076.8	18952603	18954692	2090	-	protein_coding	MZA15.12	.
AT5G25220	KNAT3	2.79182	3.0688	1.68392	2.35108	0.0219435	0.023304	0.154485	0.0623582	832593	gene32386	NC_003076.8	8735944	8738601	2658	+	protein_coding	KNAT3	A member of class II knotted1-like homeobox gene family (together with KNAT4 and KNAT5). Expressed in: hypocotyl-root boundary, anther-filament junction in flowers, ovule-funiculus and peduncle-silique boundaries, petioles and root. Light-regulated expression with differential response to red/far-red light. KNAT3 promoter activity showed cell-type specific pattern along longitudinal root axis, re…
AT5G54585	AT5G54585	2.78981	2.34427	1.32366	2.32449	0.0232644	0.0756606	0.0660732	0.0488406	835547	gene36228	NC_003076.8	22175461	22176735	1275	+	protein_coding	.	.
AT4G06745	AT4G06745	2.78683	2.88495	1.87041	1.37907	0.072148	0.0663147	0.339595	0.597283	28719805	gene26537	NC_003075.7	9920124	9920511	388	+	lncRNA	.	Natural antisense transcript overlaps with AT4G17840
AT4G33550	T16L1.40	2.78534	3.02481	0.65486	1.97229	0.0133278	0.0402474	0.18035	0.0599694	829494	gene28619	NC_003075.7	16134366	16135134	769	+	protein_coding	T16L1.40	.
AT2G31980	CYS2	2.78455	4.27825	2.78067	4.03458	0.0739862	0.0137479	0.148427	0.0549134	817757	gene13864	NC_003071.7	13609093	13609955	863	-	protein_coding	CYS2	.
AT1G10090	T27I1.11	2.78406	2.79234	1.55655	1.3484	0.00999249	0.0137479	0.056301	0.0322873	837544	gene1196	NC_003070.9	3290311	3296198	5888	-	protein_coding	T27I1.11	.
AT4G18010	IP5PII	2.78384	2.17915	0.938373	0.572199	0.0180944	0.0294114	0.734616	0.0336269	827526	gene26559	NC_003075.7	9990988	9994524	3537	-	protein_coding	IP5PII	Encodes an inositol polyphosphate 5-phosphatase that appears to have Type I activity. It can dephosphorylate IP3(inositol(1,4,5)P3) and IP4 (inositol(1,3,4,5)P4), but it does not appear to be active against phosphatidylinositol 4,5 bisphosphate. Overexpression of this gene renders plants insensitive to ABA in germination and growth assays.
AT2G39210	T16B24.15	2.78368	3.36842	0.902847	0.803872	0.0292366	0.0173052	0.734616	0.0920037	818506	gene14803	NC_003071.7	16366102	16368570	2469	-	protein_coding	T16B24.15	.
AT1G60590	F8A5.12	2.78181	2.1937	1.02337	1.05616	0.0365042	0.0173949	0.740266	0.669958	842353	gene7021	NC_003070.9	22314089	22317070	2982	-	protein_coding	F8A5.12	.
AT5G08285	AT5G08285	2.78127	0.999087	0.558245	0.814946	0.658936	0.453877	0.734616	1	28720964	gene36332	NC_003076.8	22468929	22469238	310	-	lncRNA	.	Natural antisense transcript overlaps with AT5G55460
AT4G28110	MYB41	8.03462	7.05277	8.41796	9.62239	0.027775	0.0239457	0.101293	0.05743	828927	gene27930	NC_003075.7	13968029	13969525	1497	-	protein_coding	MYB41	Member of the R2R3 factor gene family. Expression is induced in response to dessication, ABA and salt treatment. Overexpression of Myb41 results in abnormal cuticle development and decreased cell expansion.
AT3G27660	OLEO4	2.78064	2.66184	2.73109	3.03903	0.069494	0.0924002	0.140859	0.0402855	822388	gene19605	NC_003074.8	10243244	10245023	1780	+	protein_coding	OLEO4	Encodes oleosin4 (Plant Cell, 2006, 18:1961), a protein found in oil bodies, involved in seed lipid accumulation. Functions in freezing tolerance of seeds. Note: also referred to as OLE3 in Plant Journal 2008, 55:798.
AT2G41410	F13H10.4	2.77742	3.011	1.03026	1.12813	0.0206621	0.0290478	0.124226	0.183794	818739	gene15118	NC_003071.7	17261728	17263017	1290	-	protein_coding	F13H10.4	.
AT2G38400	AGT3	2.77636	3.04026	1.93398	2.56732	0.0286809	0.0262342	0.182221	0.04701	818421	gene14709	NC_003071.7	16083645	16086453	2809	+	protein_coding	AGT3	alanine:glyoxylate aminotransferase 2 homolog (AGT3) mRNA
AT5G17050	UGT78D2	3.23236	3.15082	2.11498	1.59336	0.0183551	0.0370249	0.101322	0.0865734	831568	gene31415	NC_003076.8	5607788	5609589	1802	-	protein_coding	UGT78D2	The At5g17050 encodes a anthocyanidin 3-O-glucosyltransferase which specifically glucosylates the 3-position of the flavonoid C-ring. Anthocyanidins such as cyanidin and pelargonidin as well as flavonols such as kaempferol and quercetin are accepted substrates.
AT4G31441	AT4G31441	2.7727	4.08799	10.4388	8.38378	0.51627	0.558687	0.734616	0.686581	6240362	gene28359	NC_003075.7	15254877	15254999	123	+	protein_coding	.	This gene encodes a small protein and has either evidence of transcription or purifying selection.
AT1G60140	TPS10	2.77085	2.41621	1.02253	1.2672	0.0205468	0.0168402	1	0.0387525	842309	gene6970	NC_003070.9	22176934	22181740	4807	-	protein_coding	TPS10	Encodes an enzyme putatively involved in trehalose biosynthesis. The protein has a trehalose synthase (TPS)-like domain that may or may not be active as well as a trehalose phosphatase (TPP)-like domain.
AT3G25640	AT3G25640	1.91459	2.03155	2.293	2.52759	0.0681026	0.150231	0.10168	0.0649337	822151	gene19299	NC_003074.8	9333662	9334889	1228	+	protein_coding	.	.
AT5G43180	K24F5.2	2.76976	2.06143	0.755542	1.06407	0.0225792	0.0352997	0.544279	0.717402	834336	gene34714	NC_003076.8	17336291	17337884	1594	-	protein_coding	K24F5.2	.
AT1G80180	F18B13.26	0.779397	0.989966	0.368131	0.616987	0.0196536	0.780286	0.102044	0.0619062	844358	gene9601	NC_003070.9	30156682	30157808	1127	-	protein_coding	F18B13.26	Encodes a substrate of the MAPK kinases. Phenotypic analyses of Arabidopsis expressing phosphorylation site mutant forms of At1g80180.1 showed clustered stomata and higher stomatal index in cotyledons expressing the phosphomimetic form of At1g80180.1.
AT3G03165	AT3G03165	2.76042	1.75975	1.43434	1.24756	0.208147	0.453877	0.446278	0.815713	28718636	gene17959	NC_003074.8	5380310	5380726	417	-	lncRNA	.	.
AT3G10500	NAC053	2.75915	2.33233	1.52121	1.31605	0.0458983	0.0391128	0.169285	0.113925	820214	gene17213	NC_003074.8	3271217	3274176	2960	+	protein_coding	NAC053	Encodes a transcriptional activator that is associated with the plasma membrane in a dormant form and is proteolytically cleaved to create a form that can enter the nucleus. It is thought to promote ROS production by binding directly to the promoters of genes encoding ROS biosynthetic enzymes during drought-induced leaf senescence.
AT4G12495	AT4G12495	2.75682	4.21262	1.31343	1.77067	0.0898079	0.080912	0.935009	0.0407708	28720123	gene25715	NC_003075.7	7410116	7410397	282	+	protein_coding	.	.
AT4G15530	PPDK	2.75569	3.39245	1.30611	2.7024	0.0196817	0.0306474	0.171128	0.0303691	827226	gene26202	NC_003075.7	8864615	8870979	6365	-	protein_coding	PPDK	Encodes a dual-targeted protein believed to act as a pyruvate, orthophosphate dikinase. These enzymes are normally associated with C4 photosynthesis which does not occur in Arabidopsis. However, PPDK may play a role in remobilizing nitrogen during leaf senescence in Arabidopsis. The product of the long transcript (.1 gene model) was shown to be targeted to the chloroplast, whereas the shorter tra…
AT4G25480	DREB1A	2.75568	2.65186	1.27745	1.75029	0.0502882	0.0236388	0.721043	0.0861479	828652	gene27578	NC_003075.7	13018010	13019400	1391	-	protein_coding	DREB1A	encodes a member of the DREB subfamily A-1 of ERF/AP2 transcription factor family (CBF3). The protein contains one AP2 domain. There are six members in this subfamily, including CBF1, CBF2, and CBF3. This gene is involved in response to low temperature and abscisic acid.
AT5G54470	BBX29	2.75326	2.6648	1.01573	1.34789	0.0225792	0.0409839	1	0.269869	835535	gene36213	NC_003076.8	22114304	22115539	1236	-	protein_coding	BBX29	.
AT5G40540	MNF13.60	2.75151	3.30204	1.70705	1.01261	0.0585724	0.0417216	0.139252	0.990319	834052	gene34353	NC_003076.8	16236956	16239601	2646	+	protein_coding	MNF13.60	.
AT2G43020	PAO2	2.751	2.88391	1.50253	2.31589	0.0208155	0.016404	0.495045	0.0174508	818904	gene15338	NC_003071.7	17891503	17894635	3133	+	protein_coding	PAO2	Encodes a polyamine oxidase.
AT1G13340	T6J4.22	2.75094	2.63814	1.6162	1.11306	0.0161979	0.0352002	0.134561	0.687539	837894	gene1638	NC_003070.9	4569448	4571229	1782	-	protein_coding	T6J4.22	.
AT1G10560	PUB18	2.7509	3.09392	1.5191	1.6884	0.0116702	0.0277487	0.134652	0.0550891	837597	gene1260	NC_003070.9	3484399	3486965	2567	+	protein_coding	PUB18	Encodes a protein containing a UND, a U-box, and an ARM domain. This protein has E3 ubiquitin ligase activity based on in vitro assays.
AT2G30550	DAD1-Like Lipase 3	4.38546	4.63724	5.45508	6.23532	0.0122325	0.0168628	0.102046	0.0186347	817604	gene13672	NC_003071.7	13014530	13017329	2800	+	protein_coding	DAD1-Like Lipase 3	Encodes a lipase that hydrolyzes phosphatidylcholine, glycolipids as well as triacylglycerols.
AT2G21620	RD2	2.74991	2.77581	1.87387	2.12814	0.0083949	0.0183071	0.148239	0.0460598	816700	gene12495	NC_003071.7	9248525	9250311	1787	+	protein_coding	RD2	Encodes gene that is induced in response to dessication; mRNA expression is seen 10 and 24 hrs after start of dessication treatment.
AT2G29480	GSTU2	2.74725	1.45858	2.25465	1.58311	0.0537095	0.325083	0.484039	0.065933	817497	gene13538	NC_003071.7	12630198	12631321	1124	-	protein_coding	GSTU2	Encodes glutathione transferase belonging to the tau class of GSTs. Naming convention according to Wagner et al. (2002).
AT4G34150	F28A23.90	2.74454	4.10422	0.781311	0.543213	0.0217363	0.0203317	0.330243	0.0420639	829563	gene28709	NC_003075.7	16354857	16357460	2604	+	protein_coding	F28A23.90	.
AT5G26920	CBP60G	2.74273	3.99642	0.761973	0.402574	0.0339964	0.0328413	0.173079	0.0290377	832750	gene32596	NC_003076.8	9475679	9478777	3099	+	protein_coding	CBP60G	Encodes a calmodulin-binding protein CBP60g (calmodulin binding protein 60-like.g). The calmodulin-binding domain is located near the N-terminus; calmodulin binding is dependent on Ca(2+). Inducible by both bacterial pathogen and MAMP (microbe-associated molecular pattern) treatments. Bacterial growth is enhanced in cbp60g mutants. cbp60g mutants also show defects in salicylic acid (SA) accumulat…
AT5G54860	MBG8.12	2.74076	3.38473	1.81428	1.49365	0.023475	0.0402277	0.194186	0.0507022	835577	gene36263	NC_003076.8	22284425	22287206	2782	+	protein_coding	MBG8.12	.
AT1G18200	RABA6b	2.56147	3.44256	0.436083	0.310354	0.0449463	0.0746083	0.102046	0.0629763	838399	gene2266	NC_003070.9	6265416	6267076	1661	-	protein_coding	RABA6b	.
AT1G37130	NIA2	2.73925	2.51043	0.938748	0.933994	0.00894165	0.0155927	0.490177	0.193477	840630	gene4756	NC_003070.9	14158452	14161938	3487	+	protein_coding	NIA2	Identified as a mutant resistant to chlorate. Encodes nitrate reductase structural gene. Involved in nitrate assimilation. Has nitrate reductase activity. Up-regulated by the fungus P. indica. Binds transcription factor At2g35940.
AT1G61590	T25B24.6	0.529247	0.529569	0.40529	0.510743	0.0250842	0.0337449	0.102206	0.0514569	842455	gene7162	NC_003070.9	22723368	22726190	2823	-	protein_coding	T25B24.6	.
AT5G36920	MLF18.6	2.73757	2.43495	2.03646	1.41976	0.0265052	0.0353246	0.102556	0.227803	833660	gene33827	NC_003076.8	14564089	14565010	922	-	protein_coding	MLF18.6	.
AT5G10930	CIPK5	2.7372	2.57855	1.63195	2.1428	0.0246081	0.0324356	0.298243	0.0436049	830960	gene30703	NC_003076.8	3445029	3447278	2250	-	protein_coding	CIPK5	Encodes CBL-interacting protein kinase 5 (CIPK5).
AT1G69920	GSTU12	2.73538	11.9007	3.24743	2.72714	0.0389202	0.0173949	0.173015	0.0601407	843328	gene8299	NC_003070.9	26334250	26335630	1381	-	protein_coding	GSTU12	Encodes glutathione transferase belonging to the tau class of GSTs. Naming convention according to Wagner et al. (2002).
AT2G35733	AT2G35733	2.73497	0.999083	0.615741	1.04181	0.236507	0.453877	0.734616	1	818144	gene14362	NC_003071.7	15022676	15022867	192	-	protein_coding	.	.
AT5G48110	MDN11.20	2.73446	2.28721	1.559	1.96496	0.034207	0.0478581	0.220728	0.0603732	834863	gene35366	NC_003076.8	19500988	19504534	3547	-	protein_coding	MDN11.20	.
AT3G23605	AT3G23605	2.73188	1.52225	0.973805	1.18883	0.0362924	0.205602	1	0.431741	821940	gene19024	NC_003074.8	8476482	8477392	911	+	protein_coding	.	.
AT5G20070	NUDX19	2.22444	2.14792	2.06816	2.04926	0.0238203	0.0247711	0.102483	0.0847126	832129	gene31810	NC_003076.8	6779841	6782501	2661	+	protein_coding	NUDX19	.
AT3G23250	MYB15	12.5155	11.0596	3.16244	2.10369	0.0178107	0.0198275	0.10261	0.0203468	821904	gene18979	NC_003074.8	8309209	8310910	1702	+	protein_coding	MYB15	Member of the R2R3 factor gene family.
AT1G30260	AGAMOUS-like 79	2.72618	2.67249	0.825727	1.1799	0.0419918	0.0314116	0.439265	0.667508	839906	gene3762	NC_003070.9	10650914	10651829	916	+	protein_coding	AGAMOUS-like 79	.
AT4G35485	AT4G35485	2.72548	4.08628	1.57181	1.00031	0.658936	0.292729	0.734616	0.686581	28720207	gene28877	NC_003075.7	16852486	16852981	496	+	protein_coding	.	.
AT5G44570	K15C23.1	2.72304	4.64503	1.38776	1.45799	0.0169628	0.0857366	0.101954	0.159702	834484	gene34908	NC_003076.8	17964416	17966496	2081	+	protein_coding	K15C23.1	.
AT3G55640	AT3G55640	2.72147	2.34517	1.3765	1.7519	0.0520376	0.0520959	0.615937	0.0490198	824730	gene22613	NC_003074.8	20639647	20642659	3013	+	protein_coding	.	.
AT5G50100	MPF21.11	2.71983	2.86521	1.5888	2.18468	0.0353683	0.0478026	0.109821	0.0338353	835074	gene35639	NC_003076.8	20371798	20373441	1644	+	protein_coding	MPF21.11	.
AT2G45820	F4I18.20	2.71844	2.52986	1.46858	1.26628	0.0186683	0.023304	0.226247	0.0601813	819190	gene15706	NC_003071.7	18862953	18864741	1789	-	protein_coding	F4I18.20	.
AT4G17970	ALMT12	2.71563	2.5367	1.04233	0.935832	0.0180268	0.0516593	1	0.441653	827522	gene26555	NC_003075.7	9975365	9978023	2659	+	protein_coding	ALMT12	Anion transporter involved in stomatal closure. Gene has 3 splicing variants.
AT3G14205	SAC2	1.52414	1.43504	2.14052	1.84536	0.0567868	0.03997	0.10296	0.0526327	820638	gene17726	NC_003074.8	4715650	4721003	5354	-	protein_coding	SAC2	.
AT5G66650	MSN2.3	2.71125	3.61781	0.750769	0.844967	0.0175851	0.0284774	0.354999	0.0403031	836797	gene37759	NC_003076.8	26603003	26607012	4010	-	protein_coding	MSN2.3	.
AT5G42290	K5J14.9	2.70862	3.10616	3.98561	3.49397	0.140343	0.0163265	0.169285	0.10364	834234	gene34580	NC_003076.8	16911580	16912198	619	+	protein_coding	K5J14.9	.
AT4G11600	GPX6	2.70827	2.40346	1.91911	1.66141	0.015638	0.0281802	0.346624	0.0371212	826765	gene25590	NC_003075.7	7009769	7011406	1638	-	protein_coding	GPX6	Encodes glutathione peroxidase.
AT5G44566	AT5G44566	2.70704	4.14729	0.277704	0.524332	0.619794	0.176435	0.580041	0.686581	28721248	gene34907	NC_003076.8	17963604	17963783	180	-	protein_coding	.	.
AT1G23440	F28C11.26	2.70641	2.26094	1.41247	1.3387	0.0424435	0.0443721	0.214483	0.175107	838952	gene2946	NC_003070.9	8321611	8324497	2887	+	protein_coding	F28C11.26	.
AT2G06045	AT2G06045	2.70566	4.38149	1.54481	0.680505	0.0245278	0.161616	0.585373	0.556315	3768129	gene10439	NC_003071.7	2358727	2359113	387	+	pseudogene	.	.
AT4G36820	AP22.5	2.70371	3.2336	4.10407	4.94645	0.0416543	0.0199446	0.0586652	0.0254253	829835	gene29047	NC_003075.7	17346805	17348265	1461	+	protein_coding	AP22.5	.
AT5G24870	F6A4.80	2.70205	2.28812	0.983801	1.23376	0.0141589	0.0556811	1	0.300772	832556	gene32340	NC_003076.8	8544682	8547906	3225	-	protein_coding	F6A4.80	.
AT2G27830	F15K20.7	2.70015	2.04422	0.971677	1.44669	0.0176182	0.0267219	1	0.0330811	817330	gene13329	NC_003071.7	11860218	11861525	1308	+	protein_coding	F15K20.7	.
AT2G02310	PP2-B6	2.69982	2.08515	2.90796	1.40979	0.130079	0.160473	0.133576	0.127464	814762	gene9892	NC_003071.7	608586	610283	1698	-	protein_coding	PP2-B6	.
AT1G18210	T10F20.22	2.69945	2.96963	1.11797	0.817231	0.0347292	0.0348418	0.210201	0.0830678	838401	gene2267	NC_003070.9	6266609	6268939	2331	-	protein_coding	T10F20.22	.
AT4G28490	HAE	2.69934	3.74551	1.81088	1.90429	0.0083949	0.0159562	0.0771055	0.115797	828967	gene27976	NC_003075.7	14077676	14081457	3782	+	protein_coding	HAE	Member of Receptor kinase-like protein family. Controls the separation step of floral organ abscission.
AT5G52870	MAKR5	2.69811	2.49152	1.05273	0.751869	0.085206	0.0627382	0.868019	0.0818394	835364	gene35997	NC_003076.8	21427827	21429495	1669	-	protein_coding	MAKR5	Encodes a member of the MAKR (MEMBRANE-ASSOCIATED KINASE REGULATOR) gene family. MAKRs have putative kinase interacting motifs and membrane localization signals. Known members include: AT5G26230 (MAKR1), AT1G64080 (MAKR2), AT2G37380 (MAKR3), AT2G39370 (MAKR4), AT5G52870 (MAKR5) and AT5G52900 (MAKR6).
AT5G15500	T20K14.110	2.69625	3.54502	1.10562	2.02446	0.020134	0.0345829	0.146609	0.0303974	831403	gene31220	NC_003076.8	5031648	5033540	1893	-	protein_coding	T20K14.110	.
AT2G34500	CYP710A1	2.69515	2.05724	1.54978	1.95377	0.0316201	0.039012	0.170428	0.0576893	818013	gene14199	NC_003071.7	14539373	14541617	2245	-	protein_coding	CYP710A1	Encodes a protein with C22-sterol desaturase activity. The enzyme was shown to catalyze in the presence of NADPH the conversion of &beta;-sitosterol to stigmasterol, but not that of 24-<i>epi</i>-campesterol to brassicasterol (unlike CYP710A2).
AT2G41260	M17	2.69468	2.27861	3.44659	1.24363	0.143697	0.0362185	0.192357	0.685595	818725	gene15093	NC_003071.7	17206452	17207698	1247	+	protein_coding	M17	Late-embryogenesis-abundant gene. Involved in the acquisition of desiccation tolerance during late phase of embryogenesis.
AT1G16370	OCT6	2.69424	3.77228	1.38824	1.01246	0.0306522	0.0168402	0.345171	0.941858	838207	gene2026	NC_003070.9	5596633	5598447	1815	+	protein_coding	OCT6	.
AT2G41835	AT2G41835	2.69404	1.72732	1.22262	1.19778	0.0304176	0.0571979	0.454316	0.0725834	818783	gene15180	NC_003071.7	17457699	17459691	1993	-	protein_coding	.	.
AT1G21400	F24J8.4	2.68931	3.27743	3.72948	9.72114	0.021432	0.012701	0.131936	0.039038	838739	gene2692	NC_003070.9	7493213	7496741	3529	+	protein_coding	F24J8.4	.
AT4G21390	B120	2.68774	3.2597	0.894715	0.638493	0.0333803	0.0676455	0.734616	0.0531359	827891	gene27021	NC_003075.7	11394295	11397726	3432	-	protein_coding	B120	.
AT4G14450	DL3265W	2.68608	5.59581	2.33114	2.4075	0.0559759	0.0817177	0.194351	0.154548	827090	gene26028	NC_003075.7	8309384	8310058	675	+	protein_coding	DL3265W	.
AT3G46700	AT3G46700	4.1152	3.96055	3.7615	3.23819	0.0288534	0.0334664	0.10365	0.0274709	823823	gene21442	NC_003074.8	17200167	17202074	1908	-	protein_coding	.	.
AT4G03955	AT4G03955	2.68456	1.94901	0.344038	2.66537	0.152283	0.198751	0.406716	0.207264	28719528	gene23888	NC_003075.7	712342	712526	185	+	antisense_RNA	.	Natural antisense transcript overlaps with AT4G01670
AT2G41480	AtPRX25	2.31635	2.3089	0.372457	0.318927	0.0580992	0.0671494	0.103936	0.0528707	818746	gene15133	NC_003071.7	17296894	17298725	1832	-	protein_coding	AtPRX25	Encodes a cationic cell-wall-bound peroxidase homolog that is involved in the lignification of cell walls.
AT5G01205	AT5G01205	2.67914	0.998441	1.29924	0.380117	0.658936	0.453877	1	0.686581	28720365	gene30149	NC_003076.8	1876406	1876610	205	+	lncRNA	.	Natural antisense transcript overlaps with AT5G06190
AT1G21680	F8K7.10	2.67902	1.96011	1.33837	1.81956	0.00727741	0.0137479	0.11739	0.0375768	838770	gene2725	NC_003070.9	7612834	7615374	2541	+	protein_coding	F8K7.10	.
AT3G14260	AT3G14260	2.12952	0.788922	2.9392	1.34859	0.118145	0.450661	0.104538	0.154212	820646	gene17734	NC_003074.8	4747769	4748859	1091	-	protein_coding	.	.
AT5G28770	BZO2H3	0.415553	0.358037	0.459341	0.533355	0.0222795	0.0215484	0.104909	0.0503169	832990	gene32945	NC_003076.8	10796457	10798305	1849	-	protein_coding	BZO2H3	bZIP protein BZO2H3 mRNA cds
AT1G66160	CMPG1	2.67129	3.56982	1.5403	0.716345	0.0389292	0.0375664	0.356173	0.0546922	842931	gene7787	NC_003070.9	24637196	24638608	1413	+	protein_coding	CMPG1	.
AT5G23840	MRO11.12	2.67086	2.59315	1.50664	1.79397	0.0641705	0.026397	0.379257	0.160693	832449	gene32204	NC_003076.8	8035690	8037110	1421	+	protein_coding	MRO11.12	.
AT1G68340	T22E19.3	2.66948	3.02933	2.29672	1.85892	0.0222795	0.0216914	0.133647	0.0825905	843163	gene8074	NC_003070.9	25613926	25615404	1479	-	protein_coding	T22E19.3	.
AT1G51800	IOS1	2.66896	2.23578	0.58392	0.390581	0.0159217	0.0678296	0.13231	0.0396554	841606	gene5966	NC_003070.9	19214072	19218053	3982	+	protein_coding	IOS1	The gene encodes a putative member of the LRR-RLK protein family. Expressin and mutant analysis revealed that it contributes to the interaction between Arabidopsis and Hyaloperonospora arabidopsidis. and
AT5G54170	K18G13.4	5.50121	5.80441	6.02611	5.89925	0.0204369	0.0198275	0.104941	0.0268629	835505	gene36172	NC_003076.8	21984878	21987489	2612	-	protein_coding	K18G13.4	.
AT1G43890	RAB18	38.0913	50.7121	117.821	216.075	0.0133278	0.0183996	0.105186	0.0521195	840987	gene37722	NC_003070.9	16646696	16648648	1953	+	protein_coding	RAB18	ras-related small GTPase
AT3G60140	DIN2	2.66003	4.20284	3.17477	8.93904	0.0259911	0.0613285	0.191937	0.0217996	825184	gene23183	NC_003074.8	22216540	22220824	4285	+	protein_coding	DIN2	Encodes a protein similar to beta-glucosidase and is a member of glycoside hydrolase family 1. Expression is induced after 24 hours of dark treatment, in senescing leaves and treatment with exogenous photosynthesis inhibitor. Induction of gene expression was suppressed in excised leaves supplied with sugar. The authors suggest that the gene's expression pattern is responding to the level of sugar…
AT1G77500	T5M16.9	2.65919	2.37779	1.39861	1.18187	0.0141589	0.0218943	0.187588	0.210538	844086	gene9254	NC_003070.9	29121226	29125204	3979	+	protein_coding	T5M16.9	.
AT4G26080	ABI1	5.57039	5.48579	2.94357	4.49026	0.01107	0.0168628	0.105186	0.0525633	828714	gene27654	NC_003075.7	13219915	13222376	2462	-	protein_coding	ABI1	Involved in abscisic acid (ABA) signal transduction. Negative regulator of ABA promotion of stomatal closure.
AT3G53230	AtCDC48B	2.65854	2.41356	1.1708	1.72671	0.0164909	0.0362145	0.357409	0.118768	824489	gene22310	NC_003074.8	19723350	19727128	3779	+	protein_coding	AtCDC48B	.
AT2G22240	MIPS2	2.65788	2.14015	0.919534	1.34868	0.0264605	0.0348614	0.670035	0.209215	816757	gene12578	NC_003071.7	9451605	9454300	2696	-	protein_coding	MIPS2	** Referred to as MIPS1 in Mitsuhashi et al 2008. Myo-inositol-1-phosphate synthase isoform 2. Expressed in leaf, root and silique. Immunolocalization experiments with an antibody recognizing MIPS1, MIPS2, and MIPS3 showed endosperm localization.
AT5G65990	K2A18.5	2.67473	2.35673	7.75488	8.76063	0.0217003	0.0666312	0.105186	0.0203766	836729	gene37669	NC_003076.8	26394823	26396513	1691	+	protein_coding	K2A18.5	.
AT1G55110	IDD7	2.65416	2.66288	2.12725	1.89127	0.0349981	0.0207408	0.27724	0.213239	841954	gene6422	NC_003070.9	20560258	20563269	3012	-	protein_coding	IDD7	.
AT1G04107	AT1G04107	1.03179	1.13208	0.239013	0.233479	0.921679	0.291523	0.105186	0.0715229	28716054	gene178	NC_003070.9	471127	471498	372	-	misc_RNA	.	.
AT1G19490	F18O14.41	2.65246	2.66406	1.61435	2.25963	0.0617574	0.0368781	0.280737	0.0405655	838535	gene2440	NC_003070.9	6751544	6754073	2530	-	protein_coding	F18O14.41	.
AT3G03020	F13E7.3	2.64965	2.30659	1.11245	0.860134	0.0176182	0.0750601	0.734616	0.452031	821156	gene16284	NC_003074.8	680944	681999	1056	+	protein_coding	F13E7.3	.
AT1G03220	F15K9.17	2.64861	2.77451	1.20973	1.24503	0.01107	0.0216914	0.309122	0.115264	838517	gene293	NC_003070.9	786832	788722	1891	+	protein_coding	F15K9.17	.
AT1G19570	DHAR1	2.64787	2.83123	1.49452	1.80761	0.015304	0.0173052	0.113733	0.0751133	838544	gene2449	NC_003070.9	6773302	6774523	1222	-	protein_coding	DHAR1	Encodes a member of the dehydroascorbate reductase gene family. Critical for a mutualistic symbiosis between the host Arabidopsis and the root colonizing fungus Piriformospora indica.
AT5G59060	K18B18.6	2.64445	1.4213	2.03655	1.38154	0.370845	0.367505	0.554356	0.368351	836023	gene36796	NC_003076.8	23844301	23844781	481	-	protein_coding	K18B18.6	.
AT1G24575	AT1G24575	0.785909	1.1298	2.4629	4.0965	0.165312	0.550637	0.105186	0.0348951	839072	gene3094	NC_003070.9	8710847	8711578	732	-	protein_coding	.	.
AT2G23630	sks16	0.515053	0.689266	0.42979	0.40966	0.0713907	0.189363	0.105186	0.0817597	816895	gene12770	NC_003071.7	10052365	10055427	3063	-	protein_coding	sks16	.
AT3G53830	AT3G53830	2.64235	2.09064	1.04839	1.59361	0.0500584	0.0662529	1	0.188433	824550	gene22385	NC_003074.8	19940499	19943885	3387	+	protein_coding	.	.
AT3G60110	AT3G60110	2.64229	2.18106	1.78988	1.85343	0.045318	0.0332745	0.360141	0.0755958	825181	gene23180	NC_003074.8	22197529	22201451	3923	+	protein_coding	.	.
AT4G21580	F17L22.40	2.64183	2.56289	1.78875	1.99344	0.024009	0.0209518	0.0612868	0.0269901	828243	gene27048	NC_003075.7	11475709	11477837	2129	+	protein_coding	F17L22.40	.
AT1G69252	AT1G69252	2.63935	2.41397	1.04657	1.67519	0.033375	0.0475569	0.902394	0.0619062	6240760	gene8200	NC_003070.9	26036570	26037659	1090	+	ncRNA	.	.
AT4G25640	DTX35	2.64289	2.35672	3.15009	2.22817	0.0178494	0.034728	0.105313	0.0336269	828669	gene27600	NC_003075.7	13076444	13079256	2813	-	protein_coding	DTX35	Encodes a multidrug and toxin efflux family transporter. Involved in flavonoid metabolism, affecting Root growth, seed development and germination, and pollen development, release and viability.
AT1G31350	KUF1	2.6367	2.37591	1.25729	1.2118	0.0371102	0.0505412	0.11702	0.103213	840024	gene3929	NC_003070.9	11221267	11222827	1561	-	protein_coding	KUF1	.
AT3G18777	MVE11.15	2.63656	2.69611	0.727588	1.15118	0.0158481	0.0301165	0.536589	0.686581	3768811	gene18351	NC_003074.8	6470196	6471176	981	+	transcribed_pseudogene	MVE11.15	.
AT5G11520	ASP3	2.63085	2.22636	1.72656	2.13765	0.00999249	0.0144233	0.387747	0.041076	831024	gene30777	NC_003076.8	3684946	3687854	2909	-	protein_coding	ASP3	Encodes the chloroplastic isozyme of aspartate aminotransferase. Involved in aspartate biosynthesis and nitrogen metabolism. mRNA is expressed in senescing leaves.
AT5G51990	CBF4	2.63032	2.33457	1.16351	1.12127	0.0245311	0.0622981	0.327973	0.686581	835274	gene35885	NC_003076.8	21116877	21117860	984	-	protein_coding	CBF4	encodes a member of the DREB subfamily A-1 of ERF/AP2 transcription factor family (CBF4). The protein contains one AP2 domain. There are six members in this subfamily, including CBF1, CBF2, and CBF3. This gene is involved in response to drought stress and abscisic acid treatment, but not to low temperature.
AT4G20880	T13K14.40	2.62977	2.55905	1.30507	1.42936	0.0259911	0.0419673	0.371229	0.137232	827836	gene26950	NC_003075.7	11178992	11181049	2058	-	protein_coding	T13K14.40	.
AT2G35290	SAUR79	2.62616	4.97689	0.961048	0.538174	0.0484547	0.0230042	0.788411	0.0704368	818096	gene14299	NC_003071.7	14861199	14862178	980	-	protein_coding	SAUR79	.
AT5G06015	AT5G06015	2.62516	0.999483	1.00039	1.00011	0.658936	0.453877	0.734616	0.686581	28720773	gene34324	NC_003076.8	16141472	16141678	207	+	lncRNA	.	.
AT5G01520	AIRP2	2.62493	3.15423	1.05703	3.14294	0.0398936	0.0242903	0.734616	0.033498	831747	gene29552	NC_003076.8	206432	208611	2180	+	protein_coding	AIRP2	.
AT2G24850	TAT3	14.226	22.7727	27.5036	7.37716	0.01107	0.031544	0.105335	0.0332411	817022	gene12948	NC_003071.7	10582074	10585216	3143	-	protein_coding	TAT3	Encodes a tyrosine aminotransferase that is responsive to treatment with jasmonic acid.
AT3G05880	RCI2A	2.62435	2.50163	1.7633	2.03381	0.0373415	0.0455883	0.138132	0.0419954	819757	gene16668	NC_003074.8	1755497	1756924	1428	-	protein_coding	RCI2A	Induced by low temperatures, dehydration and salt stress and ABA. Encodes a small (54 amino acids), highly hydrophobic protein that bears two potential transmembrane domains.
AT2G17220	Kin3	2.62269	2.6641	1.17896	0.8454	0.0350026	0.03619	0.562631	0.134218	816227	gene11917	NC_003071.7	7487646	7490199	2554	-	protein_coding	Kin3	Encodes a putative serine/threonine-specific protein kinase kin3. Protein is N-myristoylated.
AT3G10910	DAF-Like gene 1	2.62132	1.93287	0.964209	1.56775	0.0150602	0.0286791	0.734616	0.04701	820261	gene17265	NC_003074.8	3412911	3414019	1109	-	protein_coding	DAF-Like gene 1	.
AT2G45760	BAP2	2.62068	2.32113	1.77433	1.17492	0.0365837	0.163074	0.32748	0.278398	819184	gene15699	NC_003071.7	18846944	18847835	892	-	protein_coding	BAP2	encodes a protein that is similar to BONZAI1-binding protein BAP1.
AT3G45960	EXLA3	2.61878	4.23887	0.955882	0.47274	0.072843	0.0623061	1	0.0347531	823739	gene21325	NC_003074.8	16892702	16894153	1452	+	protein_coding	EXLA3	member of EXPANSIN-LIKE. Naming convention from the Expansin Working Group (Kende et al, 2004. Plant Mol Bio)
AT2G19900	NADP-ME1	2.61778	2.74272	4.13942	5.92939	0.0243022	0.0627382	0.0855034	0.0430763	816509	gene12259	NC_003071.7	8591808	8595559	3752	-	protein_coding	NADP-ME1	The malic enzyme (EC 1.1.1.40) encoded by AtNADP-ME1 is expressed in response to developmental and cell-specific signals. The enzyme is active in vitro and appears to function as a homohexamer or homooctamer. It is believed to be a cytosolic protein.
AT4G30490	F17I23.170	2.53567	2.34719	2.0315	2.1014	0.0206657	0.0243009	0.105449	0.0226321	829172	gene28226	NC_003075.7	14899034	14902144	3111	-	protein_coding	F17I23.170	.
AT5G22060	J2	2.61713	2.31581	1.50032	1.33004	0.00996556	0.0337815	0.55488	0.0655436	832267	gene31980	NC_003076.8	7303506	7305870	2365	-	protein_coding	J2	Co-chaperonin similar to E. coli DnaJ
AT2G33710	T1B8.3	2.61586	2.8759	1.62924	0.888752	0.0422469	0.028304	0.165684	0.585572	817936	gene14084	NC_003071.7	14258509	14260904	2396	-	protein_coding	T1B8.3	encodes a member of the ERF (ethylene response factor) subfamily B-4 of ERF/AP2 transcription factor family. The protein contains one AP2 domain. There are 7 members in this subfamily.
AT2G41800	T11A7.10	2.61421	2.7933	1.7969	1.58914	0.0526284	0.0650642	0.181608	0.043514	818779	gene15176	NC_003071.7	17436443	17438168	1726	-	protein_coding	T11A7.10	.
AT5G05300	K18I23.10	2.61085	4.212	1.34862	0.748075	0.122057	0.013153	0.734616	0.434536	28720712	gene30032	NC_003076.8	1569855	1570609	755	-	protein_coding	K18I23.10	.
AT4G01540	NTM1	2.60854	2.91875	1.39578	0.925271	0.0314405	0.0223457	0.527522	0.555214	828149	gene23868	NC_003075.7	670483	672789	2307	-	protein_coding	NTM1	Encodes a membrane-bound NAC (for NAM, ATAF1/2, CUC2) transcription factor, designated NTM1 (for NAC with transmembrane motif1). NTM1 regulates cell division in Arabidopsis.
AT1G65890	AAE12	2.60741	3.24399	1.77308	1.10294	0.0386192	0.0207335	0.193224	0.168966	842901	gene7750	NC_003070.9	24512438	24514659	2222	-	protein_coding	AAE12	.
AT1G17050	SPS2	1.86369	1.75449	2.2718	2.36685	0.0209665	0.022938	0.105515	0.102413	838275	gene2113	NC_003070.9	5828915	5831383	2469	+	protein_coding	SPS2	Encodes one of the two paralogous solanesyl diphosphate synthases - SPS1 (At1g78510) and SPS2 (At1g17050) - that assemble the side-chain of plastoquinone-9 in plastids.
AT1G01140	CIPK9	2.60615	3.08327	1.27042	1.70289	0.0180656	0.0216914	0.385746	0.066887	839349	gene18	NC_003070.9	64166	67774	3609	-	protein_coding	CIPK9	Encodes a CBL-interacting protein kinase with similarity to SOS2
AT1G21528	AT1G21528	2.60494	1.8376	3.07679	2.02628	0.315007	0.168005	0.0832067	0.167277	5007710	gene2707	NC_003070.9	7542615	7543077	463	-	protein_coding	.	.
AT3G55500	EXPA16	2.60439	5.3178	1.82818	1.53302	0.041196	0.0262837	0.336721	0.0330001	824715	gene22588	NC_003074.8	20574752	20576249	1498	-	protein_coding	EXPA16	expansin-like protein. Naming convention from the Expansin Working Group (Kende et al, 2004. Plant Mol Bio). Involved in the formation of nematode-induced syncytia in roots of Arabidopsis thaliana.
AT2G30020	AP2C1	2.60325	3.10516	1.17157	1.1022	0.0325401	0.0137479	0.117712	0.133682	817553	gene13604	NC_003071.7	12814271	12816360	2090	+	protein_coding	AP2C1	Encodes AP2C1. Belongs to the clade B of the PP2C-superfamily. Acts as a MAPK phosphatase that negatively regulates MPK4 and MPK6.
AT5G25130	CYP71B12	2.60318	1.73058	1.12815	1.92425	0.0228203	0.0356528	0.734616	0.0510547	832584	gene32374	NC_003076.8	8668232	8670237	2006	+	protein_coding	CYP71B12	putative cytochrome P450
AT1G27760	SAT32	4.13176	3.60892	4.31749	4.32486	0.023475	0.0183924	0.105676	0.0398005	839669	gene3428	NC_003070.9	9668508	9671657	3150	+	protein_coding	SAT32	Encodes a protein with similarity to human interferon-related developmental regulator (IFRD)that is involved in salt tolerance. Loss of function mutations are hypersensitive to salt stress and have reduced fertility. SAT32 is found in the cytoplasm but appears to translocate to the nucleus when plants are subject to salt stress.
AT3G52800	AT3G52800	2.60146	3.30466	1.13211	0.869905	0.00999249	0.0271398	0.515467	0.0639618	824446	gene22254	NC_003074.8	19569256	19570710	1455	+	protein_coding	.	.
AT2G46790	PRR9	2.60126	2.60552	1.34996	2.17018	0.00385398	0.0180553	0.292887	0.0645466	819292	gene15838	NC_003071.7	19232607	19235179	2573	+	protein_coding	PRR9	Pseudo-response regulator PRR9. Involved in clock function. PRR7 and PRR9 are partially redundant essential components of a temperature-sensitive circadian system. CCA1 and LHY had a positive effect on PRR9. Interact with TOC1 in a yeast two-hybrid assay. Acts as transcriptional repressor of CCA1 and LHY.
AT5G49520	WRKY48	9.19695	9.24755	2.48061	1.42245	0.00401839	0.0137674	0.106253	0.0997551	835012	gene35560	NC_003076.8	20090648	20093346	2699	+	protein_coding	WRKY48	Encodes WRKY48, a member of the WRKY Transcription Factor. WRKY48 is a stress- and pathogen-induced transcriptional activator that represses plant basal defense.
AT2G34350	F13P17.19	2.59769	2.0003	2.95558	1.58007	0.028561	0.0478835	0.0533317	0.135477	817997	gene14180	NC_003071.7	14493308	14495831	2524	+	protein_coding	F13P17.19	.
AT1G20510	OPCL1	2.59518	3.69276	1.16548	0.633658	0.031328	0.0208712	0.2804	0.0523976	838639	gene2560	NC_003070.9	7103362	7106121	2760	-	protein_coding	OPCL1	.
AT5G06090	GPAT7	5.84862	5.45612	4.87521	4.51193	0.0155707	0.0241225	0.106253	0.0310399	830496	gene30133	NC_003076.8	1835047	1837037	1991	+	protein_coding	GPAT7	putative sn-glycerol-3-phosphate 2-O-acyltransferase
AT2G18193	AT2G18193	5.47872	2.91538	4.53887	3.29744	0.015304	0.0591264	0.106253	0.0339172	816333	gene12047	NC_003071.7	7917413	7919345	1933	-	protein_coding	.	.
AT1G77000	SKP2B	1.904	1.86616	2.68555	3.24746	0.0355456	0.0616394	0.106253	0.0419954	844036	gene9193	NC_003070.9	28940147	28942639	2493	+	protein_coding	SKP2B	AtSKP2;2 is a homolog of human SKP2, the human F-box protein that recruits E2F1. Contains an F-box motif at the N-terminal region and a C-terminal Leu-rich repeat domain. Forms part of an E3-ubiquitin-ligase SCF (Skp1, cullin, F-box) complex and recruits phosphorylated AtE2Fc, a transcriptional factor that might play a role in cell division and during the transition from skotomorphogenesis to pho…
AT1G79310	MC7	3.60363	2.27319	2.30386	1.32601	0.0486108	0.0436311	0.106365	0.0607891	844269	gene9488	NC_003070.9	29833839	29835728	1890	+	protein_coding	MC7	Encodes a putative metacaspase. Arabidopsis contains three type I MCP genes (MCP1a-c) and six type II MCP genes (MCP2a#Aeif): AtMCP1a/At5g64240, AtMCP1b/At1g02170, AtMCP1c/At4g25110, AtMCP2a/At1g79310, AtMCP2b/At1g79330, AtMCP2c/At1g79320, AtMCP2d/At1g79340, AtMCP2e/At1g16420, AtMCP2f/At5g04200.
AT3G16860	COBL8	2.59181	3.54887	0.691391	0.394022	0.0137186	0.0211959	0.237351	0.051983	820941	gene18087	NC_003074.8	5759375	5762264	2890	-	protein_coding	COBL8	.
AT2G37040	PAL1	2.32622	2.83351	2.8306	2.2005	0.0106072	0.0137479	0.106372	0.0226321	818280	gene14538	NC_003071.7	15557367	15560755	3389	-	protein_coding	PAL1	Encodes PAL1, a phenylalanine ammonia-lyase. Arabidopsis has four PALs: AT2G37040 (PAL1), AT3G53260 (PAL2), AT5G04230 (PAL3) and AT3G10340 (PAL4).
AT1G09053	AT1G09053	2.58824	2.50527	1.16834	1.14101	0.0430031	0.0235608	0.17249	0.0998238	28716982	gene8203	NC_003070.9	26041040	26042686	1647	+	lncRNA	.	Natural antisense transcript overlaps with AT1G69270
AT5G28030	DES1	2.5871	2.32695	0.936105	0.978854	0.0252126	0.0611186	0.445045	0.941969	832873	gene32772	NC_003076.8	10029632	10032962	3331	-	protein_coding	DES1	.
AT1G45249	ABF2	2.58609	2.80433	1.9717	2.51978	0.0178494	0.02163	0.144641	0.0233633	841095	gene5311	NC_003070.9	17165125	17167924	2800	-	protein_coding	ABF2	Leucine zipper transcription factor that binds to the abscisic acid (ABA)#Aeiresponsive element (ABRE) motif in the promoter region of ABA-inducible genes. Enhances drought tolerance in vegetative tissues. Required for normal glucose response. Localized in the nucleus. Expressed constitutively in roots, leaf vascular tissues, and hydathodes or in all tissues under stress conditions. It's phosphor…
AT4G03110	RBP-DR1	0.644229	0.586955	0.438041	0.439167	0.0710042	0.0687363	0.106754	0.0290377	828090	gene24099	NC_003075.7	1376306	1379747	3442	-	protein_coding	RBP-DR1	Encodes a putative RNA-binding protein that is located in the cytoplasm and is involved in the hypersensitive response and positively regulates salicylic acid-mediated immunity.
AT2G24130	F27D4.4	2.58277	1.28899	1.79026	0.916988	0.0921282	0.265899	0.146063	0.586783	816947	gene12832	NC_003071.7	10258107	10261352	3246	+	protein_coding	F27D4.4	.
AT5G38710	MKD10.10	2.57937	3.29585	1.3257	0.793866	0.0534924	0.0277008	0.423305	0.116022	833862	gene34096	NC_003076.8	15501126	15504269	3144	+	protein_coding	MKD10.10	.
AT1G29270	F28N24.5	2.57934	1.58008	1.17357	1.24028	0.0289193	0.200919	0.734616	0.233256	839801	gene3632	NC_003070.9	10229808	10231384	1577	+	protein_coding	F28N24.5	.
AT1G55450	T5A14.14	2.57864	4.20215	0.806237	0.386453	0.0364619	0.0175855	0.484223	0.0329587	841992	gene6470	NC_003070.9	20704915	20707071	2157	-	protein_coding	T5A14.14	.
AT3G22060	AT3G22060	2.577	2.51357	0.756038	0.541925	0.0180944	0.0227088	0.170536	0.0338773	821768	gene18798	NC_003074.8	7770899	7772357	1459	+	protein_coding	.	contains Pfam profile: PF01657 Domain of unknown function that is usually associated with protein kinase domain Pfam:PF00069, however this protein does not have the protein kinase domain
AT1G04560	T1G11.19	2.57622	2.28901	6.38277	17.3262	0.0799253	0.291735	0.0881246	0.0855106	839491	gene466	NC_003070.9	1244947	1246059	1113	+	protein_coding	T1G11.19	.
AT5G58650	PSY1	2.57616	2.04981	1.35057	1.85036	0.0215605	0.0390695	0.743004	0.0534788	835979	gene36748	NC_003076.8	23699708	23700226	519	-	protein_coding	PSY1	Encodes PSY1, an18-aa tyrosine-sulfated glycopeptide that promotes cellular proliferation and expansion. PSY1 is widely expressed in various tissues, including shoot apical meristem, and is highly up-regulated by wounding. Perception of PSY1 depends on At1g72300, a leucine-rich repeat receptor kinase (LRR-RK).
AT3G07785	AT3G07785	2.57538	1.87276	0.772368	1.01858	0.0238873	0.0821314	0.474396	0.981275	28719027	gene21566	NC_003074.8	17532746	17534933	2188	-	lncRNA	.	Natural antisense transcript overlaps with AT3G47580
AT3G03170	T17B22.14	2.57422	3.40915	1.95477	3.63116	0.0289992	0.032924	0.269004	0.0336772	821064	gene16300	NC_003074.8	731862	732914	1053	+	protein_coding	T17B22.14	.
AT2G35945	AT2G35945	2.57364	2.67317	1.30524	1.89356	0.0125218	0.016892	0.142293	0.0731513	5007937	gene14398	NC_003071.7	15090519	15091764	1246	+	lncRNA	.	Natural antisense transcript overlaps with AT2G35940~Potential natural antisense gene, locus overlaps with AT2G35940
AT1G75860	T4O12.10	2.62465	2.46059	2.06918	1.93093	0.0395736	0.0598975	0.106968	0.0788255	843919	gene9035	NC_003070.9	28484129	28486077	1949	-	protein_coding	T4O12.10	.
AT2G41640	T32G6.16	2.5731	2.17579	0.897692	0.670638	0.0238203	0.0416516	0.240952	0.0556716	818762	gene15153	NC_003071.7	17360374	17363788	3415	+	protein_coding	T32G6.16	.
AT4G15450	DL3768W	2.57238	2.36137	1.82874	2.02865	0.0636881	0.0577835	0.0796379	0.0650357	827216	gene26192	NC_003075.7	8839256	8841575	2320	+	protein_coding	DL3768W	.
AT5G40800	MHK7.3	2.57198	2.62997	2.15673	4.38531	0.0334606	0.0315518	0.099094	0.033498	834080	gene34383	NC_003076.8	16334581	16336017	1437	-	protein_coding	MHK7.3	.
AT4G10380	NIP5%3B1	0.588458	1.12015	0.426459	1.03773	0.0679354	0.386929	0.106968	0.111303	826630	gene25418	NC_003075.7	6431161	6435396	4236	-	protein_coding	NIP5;1	Boric acid channel. Essential for efficient boron uptake and plant development under boron limitation. Also functions in arsenite transport and tolerance. Localized preferentially in outer membrane domains of root cells.
AT1G66600	ABO3	2.5632	3.09749	4.58589	3.52507	0.0705829	0.0636062	0.0624125	0.048839	842978	gene7844	NC_003070.9	24848320	24849543	1224	+	protein_coding	ABO3	A member of WRKY Transcription Factor; Group III. Involved in the regulation of plant responses to ABA and drought stress.
AT3G22910	ACA13	11.0377	6.01642	10.3866	6.27141	0.0115303	0.0236891	0.107122	0.0174508	821863	gene18920	NC_003074.8	8116292	8119490	3199	-	protein_coding	ACA13	.
AT3G10550	MTM1	2.56097	2.7789	2.34588	2.12761	0.020889	0.0121514	0.0827759	0.0441952	820220	gene27904	NC_003074.8	3292890	3298621	5732	-	protein_coding	MTM1	Has 3'-phosphatase activity against both phosphatidylinositol-3,5-bisphosphate (PtdIns3,5P2) and Phosphatidylinositol-3-phosphate (PtdIns3P). The in vitro activity was higher with PtdIns3,5P2 than with PtdIns3P.
AT2G31180	MYB14	2.56089	2.72957	4.38528	3.94356	0.0308403	0.0335974	0.087437	0.0865639	817674	gene13755	NC_003071.7	13286681	13288380	1700	-	protein_coding	MYB14	Member of the R2R3 factor gene family.
AT5G08250	F8L15.12	2.56005	2.1515	3.08228	2.97313	0.139466	0.0404278	0.121869	0.0606936	830721	gene30411	NC_003076.8	2653554	2655870	2317	-	protein_coding	F8L15.12	.
AT3G53820	AT3G53820	2.5587	1.68438	1.59714	1.50533	0.182211	0.397698	0.669854	0.0533748	824549	gene22384	NC_003074.8	19938564	19939231	668	+	protein_coding	.	.
AT3G01820	F28J7.15	2.55856	2.29429	1.4142	1.14217	0.0116702	0.0297233	0.314323	0.254761	821071	gene16130	NC_003074.8	293754	295724	1971	-	protein_coding	F28J7.15	.
AT4G03320	Tic20-IV	2.55774	2.79995	1.65215	1.87332	0.0150602	0.03025	0.126014	0.110611	827972	gene24140	NC_003075.7	1464467	1466174	1708	+	protein_coding	Tic20-IV	Encodes a component of the TIC (translocon at the inner envelope membrane of chloroplasts) protein translocation machinery mediating the protein translocation across the inner envelope of plastids. The Arabidopsis genome encodes four Tic20 homologous proteins, AT1G04940(Tic20-I), AT2G47840(Tic20-II), AT4G03320(Tic20-IV) and AT5G55710(Tic20-V).
AT2G37900	T8P21.19	2.55721	2.22541	0.966996	1.19239	0.0338726	0.034889	0.577839	0.21054	818366	gene14637	NC_003071.7	15864186	15866769	2584	-	protein_coding	T8P21.19	.
AT5G35320	T26D22.2	2.5568	1.82442	1.10162	1.47275	0.0144655	0.0562859	0.813885	0.144012	833486	gene33558	NC_003076.8	13521746	13523506	1761	+	protein_coding	T26D22.2	.
AT2G09400	AT2G09400	2.55379	1.57578	1.00075	2.23375	0.658936	0.67153	0.734616	0.686581	28718142	gene15308	NC_003071.7	17804407	17804604	198	+	antisense_RNA	.	Natural antisense transcript overlaps with AT2G42790
AT3G54200	AT3G54200	2.55163	3.13819	1.07554	0.937709	0.0382028	0.0251399	1	0.683041	824587	gene22428	NC_003074.8	20065607	20066617	1011	+	protein_coding	.	.
AT4G36850	AP22.27	2.55144	2.57166	0.802046	1.16186	0.0154149	0.0401531	0.423639	0.686581	829838	gene29050	NC_003075.7	17353291	17356037	2747	-	protein_coding	AP22.27	.
AT4G36710	HAM4	2.55097	2.07796	0.868169	0.527749	0.0265052	0.0194405	0.218286	0.0443642	829824	gene29030	NC_003075.7	17305758	17307648	1891	+	protein_coding	HAM4	.
AT4G22214	AT4G22214	4.78912	2.88272	12.0279	6.23024	0.00773773	0.0522552	0.107122	0.0233362	828314	gene27135	NC_003075.7	11754912	11756270	1359	+	protein_coding	.	Encodes a defensin-like (DEFL) family protein.
AT3G43190	SUS4	0.186843	0.296609	0.394344	0.323102	0.0141469	0.0184746	0.107148	0.051504	823393	gene20838	NC_003074.8	15179010	15184105	5096	-	protein_coding	SUS4	Encodes a protein with sucrose synthase activity (SUS4).
AT3G22800	AT3G22800	0.361079	0.544729	0.460187	0.23456	0.01107	0.0491809	0.107285	0.0381239	821851	gene18904	NC_003074.8	8062712	8064649	1938	-	protein_coding	.	.
AT1G63840	T12P18.14	2.54923	2.20364	1.01881	1.16361	0.0315005	0.031265	1	0.223144	842687	gene7473	NC_003070.9	23689603	23690807	1205	-	protein_coding	T12P18.14	.
AT4G23920	UGE2	1.87654	2.02393	2.05271	1.88243	0.0274637	0.0536351	0.10734	0.0467311	828492	gene27370	NC_003075.7	12431097	12433912	2816	+	protein_coding	UGE2	Encodes a protein with UDP-D-glucose 4-epimerase activity. Involved in growth and cell wall carbohydrate biosynthesis.
AT4G03420	F9H3.4	2.54609	2.27136	1.99791	2.72402	0.0133306	0.0234191	0.216071	0.0531494	827928	gene24162	NC_003075.7	1511597	1514072	2476	+	protein_coding	F9H3.4	.
AT3G19030	AT3G19030	2.54603	3.11837	1.35708	1.54562	0.0186918	0.0451737	0.402829	0.0387482	821436	gene18389	NC_003074.8	6563928	6564424	497	-	protein_coding	.	.
AT1G06453	AT1G06453	2.54494	1.7834	0.963848	0.963465	0.658936	0.67153	0.737628	0.68672	28716498	gene3986	NC_003070.9	11423317	11423487	171	-	snoRNA	.	snoR143
AT2G04455	U2.10b/12	2.54417	2.69589	0.583332	0.755466	0.136605	0.0419149	0.753467	0.687335	28717570	gene9977	NC_003071.7	852860	853054	195	+	snRNA	U2.10b/12	.
AT4G23250	EMB1290	2.54279	2.62994	1.70954	1.1721	0.0166184	0.0410337	0.0530826	0.0998999	828424	gene27274	NC_003075.7	12162004	12167026	5023	-	protein_coding	EMB1290	.
AT1G05100	MAPKKK18	18.1712	15.5181	15.7896	17.2007	0.00636735	0.0227088	0.107385	0.0410425	839324	gene544	NC_003070.9	1469541	1470881	1341	+	protein_coding	MAPKKK18	member of MEKK subfamily
AT4G08925	AT4G08925	2.54233	2.42133	1.06421	1.26518	0.241085	0.0449018	1	1	28720025	gene28702	NC_003075.7	16341960	16342266	307	-	lncRNA	.	Natural antisense transcript overlaps with AT4G34120
AT5G14780	FDH	2.54208	2.49699	1.46741	2.74708	0.0128709	0.0209135	0.465268	0.0233633	831330	gene31129	NC_003076.8	4776733	4779526	2794	+	protein_coding	FDH	Encodes a NAD-dependent formate dehydrogenase.
AT5G51260	MWD22.21	2.53974	3.04174	1.55261	1.61248	0.0232644	0.0400536	0.331717	0.0494639	835200	gene35795	NC_003076.8	20831984	20833817	1834	-	protein_coding	MWD22.21	.
AT1G17550	HAB2	2.53736	2.42061	1.88913	2.51441	0.0141589	0.0270966	0.322419	0.0253887	838330	gene2181	NC_003070.9	6034270	6037398	3129	+	protein_coding	HAB2	Protein Phosphatase 2C
AT4G17785	MYB39	2.53665	1.97545	1.85146	1.22024	0.117501	0.0368781	0.244626	0.37906	827500	gene26529	NC_003075.7	9881599	9883432	1834	-	protein_coding	MYB39	Encodes a putative transcription factor (MYB39).
AT2G39725	AT2G39725	2.53638	2.2954	2.12937	2.91492	0.0142785	0.133242	0.36554	0.0269023	818557	gene14875	NC_003071.7	16569430	16570748	1319	+	protein_coding	.	.
AT1G52890	NAC019	32.4767	71.2153	14.1915	28.9991	0.023961	0.012217	0.107875	0.0189443	841722	gene6116	NC_003070.9	19696923	19698482	1560	-	protein_coding	NAC019	encodes a NAC transcription factor whose expression is induced by drought, high salt, and abscisic acid. This gene binds to ERD1 promoter in vitro.
AT5G40000	MYH19.20	2.29222	2.24054	3.39892	1.40843	0.0298326	0.108792	0.107875	0.135254	833997	gene34281	NC_003076.8	16010869	16012559	1691	-	protein_coding	MYH19.20	.
AT2G47600	MHX	2.2484	1.79715	2.41518	2.57748	0.0248446	0.0417519	0.107875	0.0500871	819373	gene15947	NC_003071.7	19524117	19527580	3464	-	protein_coding	MHX	Encodes a magnesium/proton exchanger, member of putative Na+/Ca2+ antiporter gene family
AT1G08800	F22O13.29	2.53053	2.78396	1.96101	2.01553	0.0122325	0.0228435	0.138492	0.0469628	837402	gene1033	NC_003070.9	2812818	2818071	5254	-	protein_coding	F22O13.29	.
AT2G27500	F10A12.18	2.52707	2.38562	1.95499	1.22323	0.0208507	0.0355409	0.118429	0.136313	817295	gene13292	NC_003071.7	11752064	11754066	2003	-	protein_coding	F10A12.18	.
AT5G06385	AT5G06385	2.5245	3.14744	0.606101	0.930043	0.0362697	0.0392071	0.411517	0.995553	28720802	gene34645	NC_003076.8	17149832	17150219	388	-	lncRNA	.	Natural antisense transcript overlaps with AT5G42760
AT3G54430	SRS6	2.52429	2.72063	1.07026	0.670657	0.031317	0.0335538	0.734616	0.115377	824609	gene22453	NC_003074.8	20146626	20148221	1596	-	protein_coding	SRS6	A member of SHI gene family. Arabidopsis thaliana has ten members that encode proteins with a RING finger-like zinc finger motif. Despite being highly divergent in sequence, many of the SHI-related genes are partially redundant in function and synergistically promote gynoecium, stamen and leaf development in Arabidopsis.
AT3G20270	AT3G20270	2.51995	1.8347	0.832957	0.925637	0.0332928	0.0410235	0.463486	0.642459	821571	gene18548	NC_003074.8	7067057	7071039	3983	+	protein_coding	.	.
AT5G46910	MQD22.4	2.51914	2.56954	1.57552	1.25995	0.0172111	0.0483125	0.20029	0.0985607	834736	gene35220	NC_003076.8	19046339	19051379	5041	+	protein_coding	MQD22.4	.
AT5G66070	K2A18.15	2.51771	2.26206	0.864245	0.734845	0.0282437	0.0428689	0.734616	0.209159	836739	gene37683	NC_003076.8	26421610	26423240	1631	+	protein_coding	K2A18.15	.
AT4G24040	TRE1	2.51683	2.38152	1.53761	1.76627	0.0209807	0.0285769	0.111694	0.0252206	828504	gene27390	NC_003075.7	12488040	12491298	3259	+	protein_coding	TRE1	Encodes a trehalase, member of Glycoside Hydrolase Family 37.
AT2G32150	F22D22.10	2.51675	2.28375	1.34963	1.12596	0.0185657	0.039304	0.09639	0.500177	817774	gene13883	NC_003071.7	13658888	13660948	2061	+	protein_coding	F22D22.10	.
AT3G06325	AT3G06325	2.51615	2.1237	0.649923	0.934125	0.476082	0.176104	0.440786	1	28718908	gene20573	NC_003074.8	14196558	14196865	308	+	lncRNA	.	Natural antisense transcript overlaps with AT3G41762
AT1G30360	ERD4	2.51086	2.36642	1.92882	1.84794	0.014208	0.0175136	0.206053	0.0652682	839916	gene3777	NC_003070.9	10715482	10718997	3516	+	protein_coding	ERD4	.
AT1G22350	T16E15.4	2.51085	1.64976	1.02477	1.31102	0.0567868	0.0869481	1	0.324669	3766781	gene2816	NC_003070.9	7892758	7894763	2006	-	transcribed_pseudogene	T16E15.4	.
AT1G09925	AT1G09925	2.50987	2.09148	0.953965	1.10244	0.0546764	0.0454325	1	0.686581	28717208	gene9191	NC_003070.9	28935586	28937197	1612	-	misc_RNA	.	.
AT2G41250	F13H10.20	2.50807	2.12377	0.975276	1.19466	0.00894165	0.0251945	1	0.262018	818724	gene15092	NC_003071.7	17200657	17202848	2192	-	protein_coding	F13H10.20	.
AT2G23150	NRAMP3	2.50788	2.44821	1.31636	1.74114	0.043127	0.0264665	0.604472	0.0657951	816847	gene12711	NC_003071.7	9856149	9858778	2630	-	protein_coding	NRAMP3	Encodes a member of the Nramp2 metal transporter family; like its homolog Atnramp4, localized in vacuolar membrane. Seedlings of double mutant, atnramp3-1 atnramp4-1, were arrested at early germination.
AT1G24330	F3I6.27	2.50734	2.44698	1.00336	1.02499	0.0356333	0.0666358	1	1	839049	gene3062	NC_003070.9	8631206	8635055	3850	+	protein_coding	F3I6.27	.
AT1G12440	F5O11.17	0.721069	0.784955	0.485009	0.623754	0.0364619	0.0908185	0.107875	0.0845345	837801	gene1522	NC_003070.9	4241421	4243229	1809	-	protein_coding	F5O11.17	.
AT4G31750	WIN2	2.50628	2.60525	1.89459	2.27543	0.0353796	0.0182808	0.0938926	0.067098	829303	gene28395	NC_003075.7	15363708	15367892	4185	-	protein_coding	WIN2	Encodes HopW1-1-Interacting protein 2 (WIN2). Interacts with the P. syringae effector HopW1-1. WIN2 has protein phosphatase activity. Modulates plant defenses against bacteria. Three WIN proteins are identified so far (WIN1: AT1G80600; WIN2: AT4G31750; WIN3: AT5G13320).
AT5G01260	F7J8.240	2.50601	2.0599	1.35326	1.80812	0.00835228	0.0353597	0.0818902	0.0652682	831794	gene29516	NC_003076.8	105268	107454	2187	+	protein_coding	F7J8.240	.
AT4G39030	EDS5	2.50504	2.61828	1.84217	1.34542	0.0201555	0.0211476	0.221894	0.128777	830058	gene29327	NC_003075.7	18185437	18189224	3788	+	protein_coding	EDS5	Encodes an orphan multidrug and toxin extrusion transporter. Essential component of salicylic acid-dependent signaling for disease resistance. Member of the MATE-transporter family. Expression induced by salicylic acid. Mutants are salicylic acid-deficient.
AT4G39890	RABH1c	2.50309	3.31705	0.843523	0.767121	0.0146358	0.0159562	0.633966	0.113732	830148	gene29442	NC_003075.7	18505919	18507703	1785	+	protein_coding	RABH1c	.
AT2G33150	PKT3	2.50225	2.23997	1.62993	2.06713	0.0129191	0.0212822	0.267083	0.033498	817876	gene14010	NC_003071.7	14047478	14051400	3923	-	protein_coding	PKT3	Encodes an organellar (peroxisome, glyoxysome) 3-ketoacyl-CoA thiolase, involved in fatty acid b-oxidation during germination and subsequent seedling growth. Mutants have defects in glyoxysomal fatty acid beta-oxidation. EC2.3.1.16 thiolase.
AT4G21940	CPK15	2.50159	3.19728	1.52828	1.14503	0.0389202	0.019782	0.122807	0.129962	828283	gene27096	NC_003075.7	11640735	11643762	3028	+	protein_coding	CPK15	member of Calcium Dependent Protein Kinase
AT3G54150	AT3G54150	2.49973	5.15011	1.66915	0.834324	0.0415168	0.0214614	0.236553	0.478116	824582	gene22423	NC_003074.8	20050564	20052931	2368	-	protein_coding	.	.
AT1G23450	F28C11.30	2.49972	1.03721	1.15263	1.47811	0.0674982	0.748791	0.97099	0.342854	838953	gene2947	NC_003070.9	8324698	8326697	2000	+	protein_coding	F28C11.30	pentatricopeptide (PPR) repeat-containing protein
AT1G22930	F19G10.11	2.49884	2.38461	1.45982	1.76269	0.0133306	0.0258196	0.0699002	0.0285316	838900	gene2882	NC_003070.9	8117286	8122151	4866	+	protein_coding	F19G10.11	.
AT4G30650	F17I23.10	4.27937	3.64128	5.04024	3.61882	0.0150623	0.0572279	0.107877	0.0303347	829188	gene28244	NC_003075.7	14954204	14955114	911	+	protein_coding	F17I23.10	.
AT4G09035	AT4G09035	2.4973	2.21506	1.89225	1.62259	0.0366614	0.0486439	0.0970653	0.0449267	28720035	gene25229	NC_003075.7	5792289	5792625	337	-	protein_coding	.	.
AT3G05890	RCI2B	2.49644	2.03089	1.9248	2.03037	0.0332858	0.0508635	0.2325	0.0223352	819758	gene16670	NC_003074.8	1757440	1758807	1368	-	protein_coding	RCI2B	.
AT5G47230	ERF5	2.49514	3.08631	1.47314	1.39319	0.0837522	0.0374099	0.272927	0.136926	834770	gene35264	NC_003076.8	19179881	19181182	1302	+	protein_coding	ERF5	encodes a member of the ERF (ethylene response factor) subfamily B-3 of ERF/AP2 transcription factor family (ATERF-5). The protein contains one AP2 domain. There are 18 members in this subfamily including ATERF-1, ATERF-2, AND ATERF-5.
AT1G58030	CAT2	2.4949	2.33213	1.1847	1.21903	0.01327	0.021287	0.620632	0.134798	842170	gene28824	NC_003070.9	21464001	21468505	4505	-	protein_coding	CAT2	Encodes a member of the cationic amino acid transporter (CAT) subfamily of amino acid polyamine choline transporters. Localized to the tonoplast.
AT4G09030	AGP10	2.49348	2.10793	1.75519	1.42558	0.0294211	0.0255213	0.525922	0.228137	826482	gene25228	NC_003075.7	5792137	5792966	830	+	protein_coding	AGP10	Encodes arabinogalactan protein (AGP10).
AT1G05420	OFP12	2.49258	1.82454	0.884484	0.805862	0.0221424	0.0211642	0.896053	0.651979	837043	gene591	NC_003070.9	1589973	1591012	1040	+	protein_coding	OFP12	.
AT4G33800	T16L1.290	2.49257	2.12105	2.2401	3.20185	0.0637022	0.0779273	0.0594789	0.141656	829522	gene28653	NC_003075.7	16209988	16211426	1439	-	protein_coding	T16L1.290	.
AT5G24570	K18P6.10	2.49027	1.57387	1.5906	1.43468	0.0337653	0.0716657	0.734616	0.267665	832528	gene32301	NC_003076.8	8405681	8406132	452	-	protein_coding	K18P6.10	.
AT5G59550	RDUF2	2.4899	2.29855	1.38088	1.39911	0.0288429	0.0137479	0.236384	0.134073	836074	gene36857	NC_003076.8	23998164	24000166	2003	-	protein_coding	RDUF2	Encodes an ABA- and drought-induced RING-DUF1117 gene whose mutation results in hyposensitive phenotypes toward ABA in terms of germination rate and stomatal closure and markedly reduced tolerance to drought stress relative to wild-type plants.
AT1G67980	CCOAMT	2.48863	1.84297	3.14691	1.2982	0.0445578	0.108123	0.0623576	0.498366	843126	gene8031	NC_003070.9	25487682	25489312	1631	+	protein_coding	CCOAMT	Encodes S-adenosyl-L-methionine: transcaffeoyl Coenzyme A 3-O-methyltransferase.
AT5G58620	MZN1.16	2.4878	2.38661	1.6879	1.36839	0.0285098	0.0318822	0.16351	0.0651546	835976	gene36743	NC_003076.8	23693259	23696222	2964	+	protein_coding	MZN1.16	.
AT1G05057	U2.14	2.48482	1.2571	0.547808	0.41224	0.0596667	1	0.425398	0.334091	28716237	gene1743	NC_003070.9	4842275	4842469	195	+	snRNA	U2.14	.
AT2G26980	CIPK3	2.48297	1.8587	0.792036	0.840446	0.0283957	0.0468761	0.0794184	0.115751	817240	gene13223	NC_003071.7	11514600	11518734	4135	-	protein_coding	CIPK3	encodes a serine-threonine protein kinase whose expression increases in response to abscisic acid, cold, drought, high salt, and wounding conditions. The gene is expressed in developing seeds and seedlings. Lines carrying a T-DNA insertions have reduced germination efficiency and expression of cold, high-salt, and abscisic acid marker genes are altered, but not drought-response markers.
AT5G19850	T29J13.270	2.48287	2.54814	1.80105	1.76061	0.041196	0.071919	0.425454	0.0653073	832105	gene31785	NC_003076.8	6709734	6711723	1990	-	protein_coding	T29J13.270	.
AT2G08475	AT2G08475	2.48215	3.61247	1.37601	0.995899	0.0605898	0.192044	0.718161	1	28717964	gene13845	NC_003071.7	13555925	13556113	189	-	antisense_RNA	.	Natural antisense transcript overlaps with AT2G31880
AT3G09920	PIP5K9	2.48193	2.12808	1.95539	1.5358	0.0264605	0.0209518	0.269279	0.193687	820151	gene17132	NC_003074.8	3038780	3044989	6210	-	protein_coding	PIP5K9	.
AT4G05200	CRK25	0.514289	0.560283	0.350328	0.210828	0.0656292	0.0569066	0.108064	0.0403374	825868	gene24495	NC_003075.7	2679723	2682384	2662	-	protein_coding	CRK25	Encodes a cysteine-rich receptor-like protein kinase.
AT2G41070	EEL	2.4798	1.83024	1.71264	1.27434	0.0331666	0.0445636	0.54612	0.333931	818706	gene15064	NC_003071.7	17129753	17132386	2634	+	protein_coding	EEL	Transcription factor homologous to ABI5. Regulates AtEm1 expression by binding directly at the AtEm1 promoter. Located in the nucleus and expressed during seed maturation in the cotyledons and later in the whole embryo.
AT1G77760	NIA1	2.47937	3.60294	0.701836	0.50657	0.0127331	0.0231998	0.0530826	0.0226321	844112	gene9288	NC_003070.9	29235721	29239484	3764	-	protein_coding	NIA1	Encodes the cytosolic minor isoform of nitrate reductase (NR). Involved in the first step of nitrate assimilation, it contributes about 15% of the nitrate reductase activity in shoots. Similar to molybdopterin oxidoreductases at the N-terminus, and to FAD/NAD-binding cytochrome reductases at the C-terminus. Cofactors: FAD, heme iron (cytochrome B-557), and molybdenum-pterin.
AT3G06460	F24P17.4	0.448885	0.642609	0.325095	0.412369	0.036305	0.0714117	0.108064	0.0688048	819823	gene16753	NC_003074.8	1982659	1983767	1109	+	protein_coding	F24P17.4	.
AT3G59700	HLECRK	2.47804	2.44896	1.47832	0.91603	0.01985	0.0409046	0.213135	0.423242	825139	gene23121	NC_003074.8	22052121	22054394	2274	+	protein_coding	HLECRK	Member of Receptor kinase-like protein family. Represses stomatal immunity induced by Pseudomonas syringae pv. tomato DC3000.
AT2G36380	ABCG34	2.47642	2.29918	1.36226	1.17923	0.0179567	0.0196859	0.343259	0.072082	818211	gene14453	NC_003071.7	15257418	15263808	6391	+	protein_coding	ABCG34	.
AT2G02390	GSTZ1	2.47626	2.54587	1.29148	1.45345	0.0196561	0.0236876	0.590503	0.0307731	814770	gene9900	NC_003071.7	628730	631165	2436	+	protein_coding	GSTZ1	Encodes glutathione transferase belonging to the zeta class of GSTs. Naming convention according to Wagner et al. (2002). The protein undergoes spontaneous thiolation following treatment with the oxidant tert-butylhydroperoxide. It functions in vitro as a maleylacetoacetate isomerase and is likely to be involved in tyrosine catabolism.
AT1G28960	NUDX15	2.47607	2.08282	1.61985	1.92833	0.020889	0.0503873	0.3247	0.0210951	839773	gene3589	NC_003070.9	10109500	10111738	2239	-	protein_coding	NUDX15	Encodes a ppGpp pyrophosphohydrolase.
AT1G46768	RAP2.1	2.4752	2.90433	0.872409	1.55309	0.0670569	0.0358115	0.88447	0.164785	841117	gene5335	NC_003070.9	17265586	17266824	1239	-	protein_coding	RAP2.1	encodes a member of the DREB subfamily A-5 of ERF/AP2 transcription factor family (RAP2.1). The protein contains one AP2 domain. There are 16 members in this subfamily including RAP2.9 and RAP2.10.
AT5G56750	NDL1	2.47425	1.36182	1.27497	1.48617	0.0214133	0.0801423	0.232246	0.0905198	835777	gene36504	NC_003076.8	22957629	22960916	3288	+	protein_coding	NDL1	.
AT2G03995	AT2G03995	2.47205	2.44269	1.418	2.11921	0.0319326	0.357162	0.734616	0.603288	28717538	gene9772	NC_003071.7	193294	193673	380	+	lncRNA	.	.
AT2G25470	RLP21	2.47044	2.04672	0.988482	0.994543	0.0150602	0.0306599	0.764283	1	817085	gene13043	NC_003071.7	10838294	10842016	3723	+	protein_coding	RLP21	.
AT5G43980	PDLP1	2.46994	1.78381	2.04826	2.30217	0.0700132	0.0409738	0.0770761	0.106997	834421	gene34820	NC_003076.8	17694680	17696690	2011	-	protein_coding	PDLP1	Encodes a plasmodesmal protein that affects the intercellular movement of molecules through the plasmodesmata. The cytoplasmic C-terminal portion of the protein is connected to the apoplastic N-terminal portion of the protein by a single transmembrane domain (TMD). It is transported to the plasmodesmata through the secretory pathway. PDLP1 has two DUF26 domains and a signal peptide, but the prope…
AT1G44090	GA20OX5	2.46927	1.40078	8.01685	3.29602	0.0141458	0.313349	0.145092	0.0553402	841012	gene5195	NC_003070.9	16760616	16762486	1871	-	protein_coding	GA20OX5	Encodes a gibberellin 20-oxidase.
AT4G19520	F24J7.80	2.46812	3.23952	0.646671	0.350563	0.00922849	0.0328413	0.100196	0.033498	827694	gene26774	NC_003075.7	10639269	10647280	8012	-	protein_coding	F24J7.80	.
AT2G28120	F24D13.9	2.46805	1.56635	0.960806	1.16641	0.0169354	0.0477924	1	0.27254	817358	gene13366	NC_003071.7	11985687	11987836	2150	+	protein_coding	F24D13.9	.
AT2G35730	T20F21.3	2.46762	2.53315	1.26349	1.28794	0.0409522	0.0762262	0.734616	0.0516498	818143	gene14360	NC_003071.7	15020398	15021598	1201	-	protein_coding	T20F21.3	.
AT5G47560	TDT	2.46664	2.27864	0.818513	1.30288	0.0302358	0.0265445	0.504732	0.127177	834806	gene35304	NC_003076.8	19287369	19291103	3735	-	protein_coding	TDT	Encodes a tonoplast malate/fumarate transporter.
AT2G21320	BBX18	2.46486	1.93413	0.569521	0.75338	0.0232644	0.0368434	0.142542	0.175372	816671	gene12457	NC_003071.7	9126263	9127987	1725	+	protein_coding	BBX18	.
AT3G50400	AT3G50400	3.14603	3.03574	4.28663	3.74414	0.0791027	0.0599391	0.108124	0.0338353	824204	gene21938	NC_003074.8	18704764	18706672	1909	+	protein_coding	.	.
AT3G51860	CAX3	2.46406	2.31607	1.34396	1.41993	0.0232644	0.0251945	0.172339	0.160204	824349	gene22124	NC_003074.8	19239305	19242913	3609	+	protein_coding	CAX3	.
AT3G44326	AT3G44326	2.46299	2.16116	1.73464	1.54339	0.0323454	0.0435886	0.143977	0.0994123	3769632	gene21064	NC_003074.8	16000879	16002163	1285	-	protein_coding	.	.
AT1G18570	MYB51	1.69576	3.40797	0.480072	0.509584	0.0911097	0.0273843	0.108604	0.0342996	838438	gene2310	NC_003070.9	6389399	6391386	1988	+	protein_coding	MYB51	Encodes a member of the R2R3-MYB transcription family. Involved in indole glucosinolate biosynthesis.
AT2G09395	AT2G09395	2.46111	0.363094	1.00577	1.00158	0.399376	0.612902	0.734616	0.686581	28718141	gene15296	NC_003071.7	17777597	17777692	96	+	antisense_RNA	.	Natural antisense transcript overlaps with AT2G42690
AT5G22250	CAF1b	2.46076	3.58574	0.92661	0.720181	0.0190945	0.0185923	0.784158	0.024323	832285	gene32001	NC_003076.8	7365477	7366799	1323	-	protein_coding	CAF1b	Encodes one of the homologs of the yeast CCR4-associated factor 1: AT3G44260 (CAF1a), AT5G22250 (CAF1b). Has mRNA deadenylation activity. Also plays a role in plant defense responses.
AT4G30210	ATR2	2.46028	2.91423	1.70036	1.53409	0.00773773	0.0137479	0.326469	0.0535393	829144	gene28197	NC_003075.7	14796695	14800961	4267	+	protein_coding	ATR2	Encodes NADPH-cytochrome P450 reductase that catalyzes the first oxidative step of the phenylpropanoid general pathway.
AT3G47480	AT3G47480	2.46014	2.91566	1.604	1.21266	0.0411304	0.0190351	0.32253	0.317393	823902	gene21554	NC_003074.8	17496085	17497164	1080	-	protein_coding	.	.
AT2G30040	MAPKKK14	4.53666	3.56463	2.51703	1.56818	0.0144655	0.0204532	0.108633	0.054034	817555	gene13606	NC_003071.7	12821569	12823169	1601	+	protein_coding	MAPKKK14	member of MEKK subfamily
AT1G45015	AT1G45015	2.45594	2.38067	1.11015	0.892764	0.0445623	0.177123	0.837897	0.715781	841067	gene5262	NC_003070.9	17021514	17022795	1282	+	protein_coding	.	.
AT2G22920	SCPL12	0.361022	0.434348	0.414616	0.458045	0.0869379	0.0959553	0.108777	0.0472938	816823	gene12672	NC_003071.7	9753631	9757600	3970	+	protein_coding	SCPL12	.
AT3G57460	AT3G57460	2.455	4.73632	1.00002	0.96819	0.0160368	0.0155084	1	1	824913	gene22848	NC_003074.8	21262986	21265827	2842	-	protein_coding	.	.
AT3G61400	F2A19.2	2.453	1.76713	3.76981	1.17583	0.291568	0.0759338	0.136176	0.0353513	825312	gene23361	NC_003074.8	22718846	22720646	1801	+	protein_coding	F2A19.2	1-aminocyclopropane-1-carboxylate oxidase-like protein
AT2G31880	SOBIR1	2.45168	3.95342	0.929881	0.69245	0.0204406	0.020028	0.597388	0.121295	817746	gene13844	NC_003071.7	13554870	13556977	2108	+	protein_coding	SOBIR1	Encodes a putative leucine rich repeat transmembrane protein that is expressed in response to Pseudomonas syringae. Expression of SRRLK may be required for silencing via lsiRNAs. Regulates cell death and innate immunity.
AT2G15340	F26H6.14	2.45045	3.11202	5.84741	4.87331	0.0627405	0.0179379	0.204255	0.0319168	816025	gene11663	NC_003071.7	6677225	6677928	704	+	protein_coding	F26H6.14	.
AT1G30070	T1P2.12	2.45041	1.46974	0.846437	1.43535	0.0196875	0.131208	0.403815	0.101846	839886	gene3741	NC_003070.9	10546511	10548236	1726	-	protein_coding	T1P2.12	.
AT1G32900	GBSS1	2.4498	2.62094	0.959839	1.03458	0.0270686	0.0186268	0.901442	0.902044	840184	gene4142	NC_003070.9	11920390	11923866	3477	-	protein_coding	GBSS1	.
AT5G49450	bZIP1	2.44844	1.92586	1.7222	2.39021	0.0185478	0.0304001	0.342935	0.0383469	835005	gene35551	NC_003076.8	20051829	20052735	907	+	protein_coding	bZIP1	Encodes a transcription activator is a positive regulator of plant tolerance to salt, osmotic and drought stresses.
AT4G32870	T16I18.80	2.44812	2.27474	1.11528	0.99154	0.0212409	0.0243009	0.314323	1	829423	gene28541	NC_003075.7	15862117	15862814	698	+	protein_coding	T16I18.80	.
AT1G30700	T5I8.15	4.17027	5.6623	2.36383	2.51245	0.0150602	0.0153766	0.10918	0.0248119	839950	gene3821	NC_003070.9	10892445	10894714	2270	+	protein_coding	T5I8.15	.
AT1G54870	F14C21.43	2.44766	1.85106	3.17809	5.74761	0.0657424	0.0231998	0.144747	0.063213	841926	gene6387	NC_003070.9	20458952	20460647	1696	+	protein_coding	F14C21.43	ChlADR is an aldehyde reductase that catalyzes the reduction of the aldehyde carbonyl groups on saturated and alpha,beta-unsaturated aldehydes with more than 5 carbons in vitro. The N-terminal region of this protein directs GFP to the chloroplast where where ChlADR likely helps to maintain the photosynthetic process by detoxifying reactive carbonyls formed during lipid peroxidation. In addition, …
AT5G67350	K8K14.7	2.44714	1.39022	1.44031	1.28128	0.0131198	0.116453	0.515973	0.314012	836870	gene37855	NC_003076.8	26868290	26869719	1430	-	protein_coding	K8K14.7	.
AT5G43380	TOPP6	2.44485	2.91186	2.31846	1.55834	0.061491	0.0497095	0.143524	0.0419755	834356	gene34738	NC_003076.8	17419790	17421982	2193	-	protein_coding	TOPP6	encodes a type I serine/threonine protein phosphatase expressed in expressed in roots, rosettes and flowers.
AT3G05500	F22F7.5	2.44469	3.02231	1.5465	1.10102	0.0144336	0.0478595	0.391083	0.225662	819715	gene16606	NC_003074.8	1593182	1595099	1918	+	protein_coding	F22F7.5	Encodes a protein that associates with lipid droplet surfaces.
AT3G45650	NAXT1	0.50655	0.591452	0.393267	0.199505	0.0471247	0.0868063	0.10918	0.0222995	823707	gene21280	NC_003074.8	16758877	16761430	2554	+	protein_coding	NAXT1	Encodes a nitrate efflux transporter NAXT1 (for NITRATE EXCRETION TRANSPORTER1). Localized to the plasma membrane. NAXT1 belongs to a subclass of seven NAXT members from the large NITRATE TRANSPORTER1/PEPTIDE TRANSPORTER family and is mainly expressed in the cortex of mature roots.
AT3G59850	AT3G59850	2.44231	2.56604	2.77051	3.86967	0.0390895	0.0584221	0.0835184	0.0462526	825155	gene23140	NC_003074.8	22109103	22111732	2630	-	protein_coding	.	.
AT2G06850	XTH4	0.274483	0.47038	0.468669	0.507857	0.0178494	0.0269253	0.10918	0.0435569	815247	gene10542	NC_003071.7	2763449	2765743	2295	+	protein_coding	XTH4	endoxyloglucan transferase (EXGT-A1) gene
AT3G26980	MUB4	2.44035	3.00512	1.14129	0.595202	0.0230408	0.0470845	0.200625	0.0655436	822315	gene19507	NC_003074.8	9945756	9948084	2329	-	protein_coding	MUB4	.
AT1G18300	NUDT4	2.43702	1.9734	1.01144	0.806064	0.035318	0.0551658	1	0.308632	838410	gene2279	NC_003070.9	6299669	6301139	1471	+	protein_coding	NUDT4	.
AT4G05120	FUR1	2.43695	2.15639	2.57191	1.56215	0.0406709	0.0698693	0.209223	0.173398	825857	gene24484	NC_003075.7	2632524	2635143	2620	-	protein_coding	FUR1	Encodes an equilibrative nucleoside transporter AtENT3. Mutations of this locus allow mutants to grow on uridine analogue fluorouridine.
AT3G54950	pPLAIIIbeta	3.70859	3.21147	2.21841	2.01771	0.0178494	0.0251945	0.109566	0.05998	824660	gene22520	NC_003074.8	20358896	20361560	2665	-	protein_coding	pPLAIIIbeta	Encodes pPLAIIIbeta, a member of the Group 3 patatin-related phospholipases. pPLAIIIbeta hydrolyzes phospholipids and galactolipids and additionally has acyl-CoA thioesterase activity. Alterations of pPLAIIIbeta result in changes in lipid levels and composition.
AT4G25850	ORP4B	2.43546	1.78883	1.93826	1.97337	0.0986228	0.02009	0.211928	0.0387517	828691	gene27626	NC_003075.7	13142164	13146966	4803	+	protein_coding	ORP4B	.
AT5G15650	RGP2	2.43505	2.74286	1.81237	1.87509	0.015679	0.0244652	0.396444	0.0259183	831419	gene31241	NC_003076.8	5092140	5095302	3163	+	protein_coding	RGP2	RGP2 is a UDP-arabinose mutase that catalyzes the interconversion between the pyranose and furanose forms of UDP-L-arabinose. It appears to be required for proper cell wall formation. rgp1(at3g02230)/rgp2 double mutants have a male gametophyte lethal phenotype. RGP2 fusion proteins can be found in the cytosol and peripherally associated with the Golgi apparatus. RGP2 was originally identified as …
AT2G09775	AT2G09775	2.43477	1.33951	1.53195	1.64375	0.132182	0.636537	0.944885	0.848347	28718214	gene15865	NC_003071.7	19315192	19315401	210	+	lncRNA	.	.
AT5G14130	MUA22.13	2.43471	2.21376	1.56502	1.50149	0.0572526	0.0454534	0.150306	0.174121	831263	gene31047	NC_003076.8	4558704	4560315	1612	-	protein_coding	MUA22.13	.
AT1G02470	T6A9.26	2.43205	3.50964	1.01315	1.1134	0.0821966	0.0516781	1	0.92101	837812	gene193	NC_003070.9	511765	513721	1957	-	protein_coding	T6A9.26	.
AT4G10040	CYTC-2	2.43042	2.1712	1.24402	1.4695	0.034323	0.0462859	0.612487	0.0432743	826595	gene25374	NC_003075.7	6276948	6278622	1675	+	protein_coding	CYTC-2	Encodes cytochrome c. Promoter directs preferential expression in vascular tissues of cotyledons, leaves, roots, and hypocotyls, and in anthers.
AT1G05450	T25N20.10	2.42777	2.32768	4.76699	5.09896	0.156983	0.119514	0.09639	0.0356134	837046	gene594	NC_003070.9	1599876	1601214	1339	+	protein_coding	T25N20.10	Encodes a Protease inhibitor/seed storage/LTP family protein
AT2G33700	PP2CG1	2.4274	2.21036	1.61788	1.85714	0.0215279	0.0335206	0.0711361	0.0836701	817935	gene14081	NC_003071.7	14253212	14256003	2792	+	protein_coding	PP2CG1	Encodes a putative protein phosphatase 2C that positively regulates salt tolerance in abscisic acid-dependent manner.
AT4G08815	AT4G08815	2.42611	2.57899	1.38908	2.51977	0.0546156	0.0536903	0.381049	0.0488406	28720017	gene28636	NC_003075.7	16169218	16169439	222	-	lncRNA	.	Natural antisense transcript overlaps with AT4G33666
AT1G50740	F4M15.3	2.42582	3.40637	0.963707	0.811407	0.043478	0.0339549	0.885778	0.139817	841496	gene5837	NC_003070.9	18807672	18809035	1364	+	protein_coding	F4M15.3	.
AT4G19960	KUP9	2.42301	2.33318	0.74487	0.65351	0.0181499	0.0173277	0.175504	0.0555638	827740	gene26832	NC_003075.7	10813183	10817070	3888	+	protein_coding	KUP9	Encodes a potassium ion transmembrane transporter. Also mediates cesium uptake when expressed in E. coli.
AT5G36220	CYP81D1	2.42259	2.79291	1.1602	1.19917	0.0199612	0.0213304	0.662822	0.251621	833619	gene33738	NC_003076.8	14253673	14256284	2612	-	protein_coding	CYP81D1	member of CYP81D family of cytochrome p450s. This gene was originally called CYP91A1, but was later renamed to CYP81D1.
AT3G23560	ALF5	2.42235	2.02052	1.12307	1.12069	0.0229596	0.0653518	0.291188	0.221852	821935	gene19016	NC_003074.8	8453903	8456708	2806	-	protein_coding	ALF5	Member of the multidrug and toxic compound extrusion (MATE) family, protects roots from inhibitory compounds.
AT1G05323	AT1G05323	2.42167	0.826055	1.0007	1.9521	0.716583	0.67153	0.734616	0.019951	28716291	gene2206	NC_003070.9	6106370	6106594	225	-	lncRNA	.	.
AT5G01300	T10O8.10	2.42136	2.90006	2.46537	2.4788	0.0228203	0.0331971	0.205493	0.210677	830983	gene29520	NC_003076.8	121483	122525	1043	-	protein_coding	T10O8.10	.
AT4G39070	BZS1	2.421	2.27129	6.89669	5.13413	0.0834124	0.0656848	0.0530826	0.0268778	830062	gene29333	NC_003075.7	18204631	18206684	2054	-	protein_coding	BZS1	Encodes BZS1, a brassinosteroids-regulated BZR1 target (BRBT) gene. BZS1 is a putative zinc finger transcription factor. Expression of BZS1 was increased under BR-deficient condition and repressed by BR. Transgenic Arabidopsis plants overexpressing BZS1 showed a hypersensitivity to the BR biosynthetic inhibitor brassinazole (BRZ). In contrast, transgenic plants expressing reduced level of BZS1 ha…
AT5G37300	WSD1	2.42061	2.04041	1.00087	1.00024	0.0305045	0.0294375	0.734616	0.686581	833704	gene33887	NC_003076.8	14767426	14770396	2971	+	protein_coding	WSD1	Encodes a bifunctional enzyme, wax ester synthase (WS) and diacylglycerol acyltransferase (DGAT). In vitro assay indicated a ratio of 10.9 between its WS and DGAT activities. Both mutant and in vivo expression/analysis in yeast studies indicated a role in wax biosynthesis.
AT1G13960	WRKY4	2.42034	1.9988	1.40433	1.6719	0.0122091	0.0453949	0.329603	0.0717653	837956	gene1719	NC_003070.9	4776283	4779420	3138	+	protein_coding	WRKY4	Encodes WRKY DNA-binding protein 4 (WRKY4).
AT3G18230	AT3G18230	0.766851	0.850532	0.497435	0.590403	0.27532	0.392706	0.109857	0.0438819	821351	gene18272	NC_003074.8	6251315	6254221	2907	+	protein_coding	.	.
AT2G33060	RLP27	2.4187	1.39176	0.95546	0.877205	0.0417912	0.17898	1	0.325099	817868	gene14001	NC_003071.7	14025483	14028261	2779	+	protein_coding	RLP27	.
AT3G55740	PROT2	2.2798	1.78912	3.20791	1.6082	0.0296995	0.0228435	0.109977	0.0517961	824740	gene22634	NC_003074.8	20695433	20698292	2860	+	protein_coding	PROT2	Encodes a proline transporter with affinity for gly betaine, proline, and GABA. Protein is expressed most highly in the roots.
AT4G33666	AT4G33666	2.41778	2.12858	1.08481	2.78445	0.00922849	0.0389914	1	0.109946	829508	gene28635	NC_003075.7	16169048	16169535	488	+	protein_coding	.	.
AT3G62990	AT3G62990	2.41741	3.45577	3.94773	11.6897	0.13509	0.0841249	0.0934913	0.0686541	825474	gene23564	NC_003074.8	23282583	23283368	786	+	protein_coding	.	.
AT1G12950	RSH2	5.89144	3.8066	9.55987	2.54714	0.0284205	0.0241225	0.110014	0.0489309	837853	gene1591	NC_003070.9	4419714	4422684	2971	+	protein_coding	RSH2	.
AT3G26910	AT3G26910	2.41659	2.43538	1.43116	1.191	0.0240882	0.0474308	0.170897	0.197579	822307	gene19496	NC_003074.8	9914959	9918810	3852	-	protein_coding	.	.
AT5G03190	CPUORF47	2.41206	2.87748	1.31723	2.60454	0.0425447	0.0285511	0.110857	0.0320104	831909	gene29761	NC_003076.8	758374	760382	2009	+	protein_coding	CPUORF47	.
AT3G06420	ATG8H	2.97228	2.25393	2.17212	2.6786	0.0171273	0.0276266	0.110014	0.0729416	819816	gene16740	NC_003074.8	1954990	1956397	1408	-	protein_coding	ATG8H	.
AT3G22600	glycosylphosphatidylinositol-anchored lipid protein transfer 5	2.41034	2.60849	1.97634	2.01808	0.023961	0.0238336	0.149819	0.0376861	821832	gene18881	NC_003074.8	8006249	8007836	1588	-	protein_coding	glycosylphosphatidylinositol-anchored lipid protein transfer 5	.
AT1G07630	PLL5	2.40802	2.03819	0.988763	0.886718	0.0246022	0.0735175	1	0.140198	837276	gene884	NC_003070.9	2348915	2351799	2885	+	protein_coding	PLL5	Encodes a protein phosphatase 2C like gene, similar to POL. Involved in leaf development. Knockout mutants have abnormally shaped leaves.
AT1G07200	F10K1.9	2.40778	1.94788	1.50425	2.21662	0.0344373	0.0297373	0.141917	0.0329587	837231	gene828	NC_003070.9	2208477	2212718	4242	-	protein_coding	F10K1.9	Encodes a member of an eight-gene family (SMAX1 and SMAX1-like) that has weak similarity to AtHSP101, a ClpB chaperonin required for thermotolerance.
AT1G66050	VIM2	2.40638	1.30385	3.02391	4.01907	0.0139705	0.0396744	0.0660732	0.0619062	842919	gene7774	NC_003070.9	24589343	24592780	3438	+	protein_coding	VIM2	Encodes a protein that is similar to VIM1 but is not involved in cytosine methylation. This protein has an N-terminal PHD domain and two RING domains surrounding an SRA domain. ORTH5/VIM2 has E3 ubiquitin ligase activity in vitro.
AT3G51430	YLS2	2.40558	2.81552	1.09518	1.28237	0.0458983	0.0137479	0.611725	0.252244	824306	gene22074	NC_003074.8	19086344	19088150	1807	+	protein_coding	YLS2	Although this enzyme is predicted to encode a strictosidine synthase (SS), it lacks a conserved catalytic glutamate residue found in active SS enzymes and it is not expected to have SS activity.
AT4G09215	AT4G09215	2.40537	1.59129	1.89728	2.62336	0.0900577	0.118321	0.294055	0.129267	28720052	gene28894	NC_003075.7	16891400	16891847	448	-	misc_RNA	.	.
AT2G28110	FRA8	2.40526	2.45123	0.927928	1.45574	0.0460528	0.0432091	0.635544	0.0576893	817357	gene13365	NC_003071.7	11977865	11980003	2139	-	protein_coding	FRA8	Homolog to AT5G22940, a member of glycosyltransferase family 47 that is involved in secondary cell wall biosynthesis. It exhibits high sequence similarity to tobacco (Nicotiana plumbaginifolia) pectin glucuronyltransferase. Protein has a domain that shares significant similarity with the pfam03016 domain. It is expressed specifically in developing vessels and fiber cells, and FRA8 is targeted to …
AT1G04247	AT1G04247	7.553	7.77196	2.11092	2.15663	0.0123761	0.0410337	0.110457	0.0692449	28716081	gene420	NC_003070.9	1120225	1122526	2302	+	lncRNA	.	Natural antisense transcript overlaps with AT1G04220
AT5G19230	T24G5.130	2.40024	3.21629	1.01371	0.733141	0.0217784	0.013991	1	0.120767	832043	gene31709	NC_003076.8	6467193	6468848	1656	+	protein_coding	T24G5.130	.
AT1G14870	PCR2	2.40024	2.99811	1.36518	0.947608	0.0274653	0.0294024	0.260265	0.376614	838052	gene1840	NC_003070.9	5128344	5129731	1388	-	protein_coding	PCR2	PCR2 encodes a membrane protein involved in zinc transport and detoxification.
AT1G52880	NAM	2.39962	2.26758	0.940782	2.03984	0.026349	0.0275642	0.877072	0.0546922	841721	gene6115	NC_003070.9	19688708	19690589	1882	-	protein_coding	NAM	Transcription factor with a NAC domain. Homologous to the petunia gene NAM which is required for the development of the shoot. Expressed in the embryo.
AT3G16050	PDX1.2	2.39902	1.36894	0.748173	0.9763	0.0303278	0.413146	0.236118	0.814464	820850	gene17979	NC_003074.8	5443950	5445329	1380	-	protein_coding	PDX1.2	Encodes a protein with pyridoxal phosphate synthase activity whose transcripts were detected mostly in roots and accumulate during senescence. The protein was found in very low abundance, which prevented a specific localisation.
AT3G53810	L-type lectin receptor kinase IV.2	2.39601	2.48465	1.13967	1.07436	0.0415777	0.0557936	0.59524	0.71337	824548	gene22383	NC_003074.8	19932970	19935392	2423	-	protein_coding	L-type lectin receptor kinase IV.2	.
AT3G04670	WRKY39	2.39445	1.91545	1.70044	1.61719	0.0128709	0.0220999	0.22499	0.0268778	819625	gene16489	NC_003074.8	1266056	1268378	2323	-	protein_coding	WRKY39	member of WRKY Transcription Factor; Group II-d
AT1G70690	HWI1	1.02308	1.22342	0.497884	0.384242	1	0.345027	0.110457	0.0655151	843406	gene8399	NC_003070.9	26651840	26653643	1804	+	protein_coding	HWI1	Encodes a plasmodesmal protein that may be involved in the intercellular movement of molecules through the plasmodesmata. The protein has two DUF26 domains and a single transmembrane domain.
AT2G46600	F13A10.13	2.39203	2.79695	1.76884	1.26147	0.0329733	0.0366915	0.207481	0.139295	819272	gene15810	NC_003071.7	19136019	19136600	582	+	protein_coding	F13A10.13	.
AT1G71890	SUC5	2.39151	1.55857	1.25504	1.18423	0.0224351	0.140198	0.659032	0.253342	843520	gene8537	NC_003070.9	27058381	27060786	2406	+	protein_coding	SUC5	Encodes a sucrose transporter that is expressed in the endosperm. Mutants have delayed accumulation of fatty acids and embryo maturation.
AT2G31420	T28P16.9	2.39091	1.54637	1.4101	1.77069	0.0192324	0.33176	0.241343	0.108744	817700	gene13785	NC_003071.7	13393364	13394136	773	-	protein_coding	T28P16.9	.
AT1G17830	F2H15.6	2.38976	2.41067	1.93872	1.68811	0.0134919	0.0203317	0.224393	0.0867685	838361	gene2216	NC_003070.9	6135751	6138500	2750	-	protein_coding	F2H15.6	.
AT3G49760	bZIP5	2.38975	1.8736	0.921741	2.5663	0.103223	0.128466	0.93968	0.0523418	824138	gene21859	NC_003074.8	18455231	18456125	895	-	protein_coding	bZIP5	.
AT4G11330	MPK5	2.38951	3.06885	1.47953	1.25438	0.0261646	0.0498525	0.165684	0.415955	826735	gene25549	NC_003075.7	6891926	6894283	2358	+	protein_coding	MPK5	MAP kinase
AT5G54240	MDK4.6	2.38934	1.87364	1.12867	1.26407	0.12612	0.0991476	0.519363	0.131259	835512	gene36186	NC_003076.8	22022978	22024658	1681	-	protein_coding	MDK4.6	.
AT5G07635	AT5G07635	2.38576	1.2505	0.722777	1.77019	0.503755	0.671671	0.942094	0.523209	28720908	gene35694	NC_003076.8	20540612	20540859	248	-	lncRNA	.	.
AT5G67210	IRX15-L	2.38434	3.79375	1.05564	0.800044	0.0321649	0.0247435	0.734616	0.105857	836856	gene37836	NC_003076.8	26818949	26820157	1209	+	protein_coding	IRX15-L	Encode a DUF579 (domain of unknown function 579) containing protein essential for normal xylan synthesis and deposition in the secondary cell wall.
AT5G41600	BTI3	2.38287	2.55699	1.64259	1.54497	0.0127003	0.0270759	0.37433	0.0221898	834162	gene34483	NC_003076.8	16636029	16637908	1880	+	protein_coding	BTI3	.
AT1G78170	T11I11.11	2.38252	2.03821	2.41882	1.85198	0.0293	0.0703696	0.0692984	0.097024	844153	gene9342	NC_003070.9	29413874	29415197	1324	+	protein_coding	T11I11.11	.
AT2G21400	SRS3	2.38211	2.25386	2.96506	3.7944	0.0266516	0.0708368	0.11247	0.120836	816679	gene12466	NC_003071.7	9158310	9159732	1423	+	protein_coding	SRS3	A member of SHI gene family. Arabidopsis thaliana has ten members that encode proteins with a RING finger-like zinc finger motif. Despite being highly divergent in sequence, many of the SHI-related genes are partially redundant in function and synergistically promote gynoecium, stamen and leaf development in Arabidopsis.
AT4G32020	F10N7.170	2.38136	2.42312	1.14389	0.967503	0.0150602	0.0313197	0.0618996	0.286106	829333	gene28435	NC_003075.7	15487914	15490048	2135	+	protein_coding	F10N7.170	.
AT5G06870	PGIP2	2.38097	3.38573	2.32193	1.47451	0.0101368	0.0194405	0.223471	0.360088	830578	gene30231	NC_003076.8	2133918	2135168	1251	+	protein_coding	PGIP2	Encodes a polygalacturonase inhibiting protein involved in plant defense response. PGIPs inhibit the activity of pectin degrading enzymes such as those produced by fungal pathogens. PGIP2 is induced by fungal infection and methyl jasmonate.Suppressed in the proton sensitive stop1-mutant, but the transcription level was recovered by transformation of STOP2. Knockout mutant showed severe damage in …
AT3G01970	WRKY45	2.37992	3.28799	1.02582	1.55339	0.0413233	0.0725714	0.999734	0.0528707	821270	gene16148	NC_003074.8	325952	327412	1461	-	protein_coding	WRKY45	member of WRKY Transcription Factor; Group I
AT5G62130	MTG10.16	2.37848	2.64282	0.984223	1.13516	0.00649498	0.0228435	1	0.619155	836333	gene37171	NC_003076.8	24950264	24953362	3099	-	protein_coding	MTG10.16	.
AT2G31955	CNX2	2.37792	2.33704	1.76709	1.69499	0.0239425	0.0415522	0.216663	0.0174508	817754	gene13859	NC_003071.7	13583985	13586703	2719	-	protein_coding	CNX2	COFACTOR OF NITRATE REDUCTASE AND XANTHINE DEHYDROGENASE 2. Encodes a protein involved in molybdenum cofactor biosynthesis. Homologous to E.coli moaA. Expression is abundant in all tissues examined, particularly in roots. Appears to have targeting signals for chloroplast or mitochondria.
AT3G01635	AT3G01635	2.37735	2.54498	0.66368	0.663312	0.658936	0.198339	0.734616	0.686581	28718504	gene16591	NC_003074.8	1545105	1545304	200	-	lncRNA	.	Natural antisense transcript overlaps with AT3G05380
AT1G80130	F18B13.21	2.37648	2.39644	1.13823	1.58706	0.0274205	0.0714117	0.734616	0.0480957	844353	gene9592	NC_003070.9	30140912	30142697	1786	-	protein_coding	F18B13.21	.
AT2G32930	ZFN2	2.37591	2.8586	1.66178	1.41655	0.0241972	0.0358689	0.161213	0.0942572	817855	gene13987	NC_003071.7	13965714	13968957	3244	-	protein_coding	ZFN2	Encodes a zinc finger protein.
AT5G26600	AT5G26600	2.37524	2.09899	1.41697	1.67648	0.0435047	0.0657951	0.0530826	0.0398613	832730	gene32571	NC_003076.8	9377249	9380063	2815	+	protein_coding	.	.
AT4G08170	T12G13.10	2.37488	2.56453	1.7466	1.75508	0.0387452	0.0207844	0.140671	0.0909325	826367	gene25068	NC_003075.7	5163220	5167192	3973	-	protein_coding	T12G13.10	.
AT5G07010	ST2A	16.8484	21.2846	10.4367	17.8971	0.0137186	0.0168402	0.110508	0.0251739	830592	gene30245	NC_003076.8	2174668	2176446	1779	-	protein_coding	ST2A	Encodes a sulfotransferase that acts specifically on 11- and 12-hydroxyjasmonic acid. Transcript levels for this enzyme are increased by treatments with jasmonic acid (JA), 12-hydroxyJA, JA-isoleucine, and 12-oxyphytodienoic acid (a JA precursor).
AT4G27560	T29A15.50	4.0885	4.98348	6.38591	4.86087	0.0125218	0.0182359	0.110585	0.0244645	828865	gene27852	NC_003075.7	13759800	13761603	1804	-	protein_coding	T29A15.50	.
AT3G14660	CYP72A13	2.37282	2.07101	1.62604	1.59521	0.0164059	0.0447536	0.35318	0.0644355	820694	gene17792	NC_003074.8	4924777	4927607	2831	+	protein_coding	CYP72A13	putative cytochrome P450
AT5G14760	AO	2.37043	2.31334	1.40665	1.0642	0.0152863	0.016892	0.734616	1	831328	gene31127	NC_003076.8	4768263	4772153	3891	+	protein_coding	AO	At5g14760 encodes for L-aspartate oxidase involved in the early steps of NAD biosynthesis. In contrary to the EC 1.4.3.16 (l-aspartate oxidase - deaminating) the enzyme catalyzes the reaction L-aspartate + O2 = iminoaspartate (alpha-iminosuccinate) + H2O2
AT1G61820	BGLU46	2.36769	2.33685	1.61721	1.4917	0.0174046	0.0214614	0.413894	0.135572	842479	gene7198	NC_003070.9	22835078	22838635	3558	+	protein_coding	BGLU46	.
AT1G51780	ILL5	2.36569	3.92295	0.975977	0.975271	0.026988	0.0121514	0.748762	0.689096	841604	gene5964	NC_003070.9	19204512	19206586	2075	+	protein_coding	ILL5	encodes a member of the six Arabidopsis IAA-amino acid conjugate hydrolase subfamily and conjugates and is very similar to IAR3.
AT3G56880	AT3G56880	2.3656	2.98581	1.31787	1.16578	0.014761	0.0168647	0.108633	0.292698	824855	gene22771	NC_003074.8	21059785	21061247	1463	+	protein_coding	.	.
AT5G03700	F17C15.120	2.36316	2.22318	1.72145	1.53017	0.0291369	0.0510613	0.134566	0.0942096	831753	gene29833	NC_003076.8	965562	967432	1871	-	protein_coding	F17C15.120	.
AT4G02410	AtLPK1	2.36208	2.44529	0.959621	0.709777	0.0254442	0.0231889	0.734616	0.113624	828032	gene23996	NC_003075.7	1059799	1062159	2361	-	protein_coding	AtLPK1	.
AT2G39110	T7F6.28	2.36161	2.46344	1.46804	1.04696	0.0198099	0.0390933	0.126014	0.412033	818497	gene14790	NC_003071.7	16319447	16321685	2239	+	protein_coding	T7F6.28	.
AT3G19240	AT3G19240	2.36113	2.92654	0.70911	0.57567	0.0098946	0.0375555	0.357262	0.0415343	821458	gene18415	NC_003074.8	6664044	6667021	2978	+	protein_coding	.	.
AT2G38820	F13I13.5	2.36075	1.88683	1.20927	2.20673	0.0215408	0.0428091	0.319488	0.137144	818464	gene14757	NC_003071.7	16221815	16223746	1932	+	protein_coding	F13I13.5	.
AT2G40200	T7M7.8	2.36052	2.01162	1.12627	1.11472	0.0662626	0.0594599	0.878538	0.441142	818611	gene14945	NC_003071.7	16791010	16792376	1367	+	protein_coding	T7M7.8	.
AT3G03815	AT3G03815	2.35905	2.47787	2.11007	2.82129	0.157025	0.270502	0.251461	0.0728719	28718696	gene18423	NC_003074.8	6687213	6689728	2516	-	lncRNA	.	Natural antisense transcript overlaps with AT3G19290
AT2G37150	T2N18.9	2.3587	2.04984	1.31892	1.48774	0.0457446	0.0584487	0.347236	0.180979	818291	gene14551	NC_003071.7	15603142	15608587	5446	-	protein_coding	T2N18.9	.
AT5G01515	AT5G01515	2.3575	2.41959	1.00098	2.83275	0.658936	0.67153	0.734616	0.686581	28720390	gene30403	NC_003076.8	2632770	2632923	154	-	snoRNA	.	AtsnoR100a
AT1G75170	F22H5.20	3.43622	3.61778	2.81489	3.82383	0.0106072	0.0140011	0.111413	0.0222995	843854	gene8950	NC_003070.9	28213666	28215887	2222	+	protein_coding	F22H5.20	.
AT2G18170	MPK7	2.35601	2.36759	1.4356	1.7945	0.0325405	0.019325	0.0927188	0.0531359	816330	gene12044	NC_003071.7	7907774	7910040	2267	-	protein_coding	MPK7	.
AT5G58350	WNK4	2.35463	3.63282	0.709041	0.938606	0.0274205	0.0412547	0.127029	0.488769	835947	gene36703	NC_003076.8	23584789	23587801	3013	+	protein_coding	WNK4	Encodes a member of the WNK family (9 members in all) of protein kinases, the structural design of which is clearly distinct from those of other known protein kinases, such as receptor-like kinases and mitogen-activated protein kinases. Its transcription is under the control of circadian rhythms.
AT1G54290	F20D21.11	2.35345	2.32534	1.5487	2.11333	0.0219778	0.0684928	0.441887	0.0436049	841870	gene6316	NC_003070.9	20268474	20270140	1667	-	protein_coding	F20D21.11	.
AT1G69890	T17F3.8	2.35225	2.96486	1.19675	0.995453	0.0232225	0.0234191	0.523439	1	843325	gene8296	NC_003070.9	26323086	26324946	1861	-	protein_coding	T17F3.8	.
AT2G29350	SAG13	2.35224	2.26446	1.3058	1.64811	0.0336018	0.091221	0.734616	0.316001	817484	gene13522	NC_003071.7	12600914	12602556	1643	+	protein_coding	SAG13	senescence-associated gene SAG13 encoding a short-chain alcohol dehydrogenase
AT5G46295	AT5G46295	2.35062	3.77583	1.34942	0.802681	0.0450049	0.0230042	0.23778	0.686581	834672	gene35137	NC_003076.8	18779790	18780205	416	-	protein_coding	.	.
AT5G03030	F15A17.60	2.35023	3.39012	1.8989	2.13885	0.0250988	0.0170309	0.129708	0.0649068	831703	gene29744	NC_003076.8	708318	709734	1417	-	protein_coding	F15A17.60	.
AT4G29950	AT4G29950	2.34999	2.37825	1.15825	1.47354	0.0182965	0.0191637	0.584724	0.0577271	829118	gene28164	NC_003075.7	14656954	14660573	3620	+	protein_coding	.	.
AT1G10480	ZFP5	2.34987	2.5437	1.6521	4.2672	0.0326968	0.0864733	0.125613	0.0251739	837588	gene1248	NC_003070.9	3449567	3451226	1660	+	protein_coding	ZFP5	Encodes a zinc finger protein containing only a single zinc finger that acts downstream of ZFP6 in regulating trichome development by integrating GA and cytokinin signaling.
AT1G02816	AT1G02816	2.34825	2.37847	1.26437	1.40176	0.0318941	0.0652237	0.15677	0.0615084	839308	gene238	NC_003070.9	621453	623054	1602	+	protein_coding	.	.
AT3G03385	AT3G03385	2.34824	3.28425	0.739623	0.365901	0.14329	0.0338335	0.518427	0.0392554	28718656	gene18088	NC_003074.8	5760198	5760590	393	+	lncRNA	.	Natural antisense transcript overlaps with AT3G16860
AT2G42540	COR15A	250.544	283.218	72.8455	92.9807	0.023475	0.0163168	0.111459	0.0374307	818854	gene15277	NC_003071.7	17710441	17712330	1890	-	protein_coding	COR15A	A cold-regulated gene whose product is targeted to the chloroplast. Cor15am protects stromal proteins from aggregation under various stress conditions. Constitutive expression increases freezing tolerance in protoplasts in vitro and chloroplasts in vivo. NMR and x-ray diffraction studies suggest that COR15a alters the intrinsic curvature of the inner membrane of chloroplast envelope. Late Embryog…
AT1G10340	F14N23.22	1.53462	1.88946	0.33737	0.169678	0.0389202	0.041716	0.111459	0.033498	837573	gene1228	NC_003070.9	3390322	3392633	2312	-	protein_coding	F14N23.22	.
AT1G28265	AT1G28265	2.34503	1.61788	2.10483	1.75686	0.61388	0.668022	0.214924	0.307988	28717273	gene3489	NC_003070.9	9879035	9879310	276	+	protein_coding	.	.
AT1G01170	F6F3.32	0.873974	0.807341	0.398524	0.562094	0.233783	0.212799	0.111459	0.115543	839263	gene22	NC_003070.9	73931	74737	807	-	protein_coding	F6F3.32	.
AT5G16650	MTG13.10	2.34345	2.00211	1.64412	1.96982	0.0280369	0.0175855	0.37323	0.0699677	831527	gene31372	NC_003076.8	5463177	5465398	2222	-	protein_coding	MTG13.10	.
AT5G42965	AT5G42965	2.34287	1.70341	1.51282	0.846877	0.0662626	0.395548	0.642804	0.891284	834311	gene34678	NC_003076.8	17236736	17237139	404	+	protein_coding	.	.
AT3G15760	AT3G15760	2.34195	1.71088	1.07802	1.24003	0.0323199	0.0714435	0.915247	0.130953	820819	gene17944	NC_003074.8	5337475	5338562	1088	+	protein_coding	.	.
AT2G32240	F22D22.1	2.34163	3.56996	1.027	0.985833	0.0116702	0.0217786	0.734616	1	817784	gene13894	NC_003071.7	13684299	13691155	6857	-	protein_coding	F22D22.1	.
AT5G02950	F9G14.260	2.34128	1.92158	1.11478	1.28709	0.0342248	0.0516593	0.527471	0.248438	831728	gene29734	NC_003076.8	690685	693099	2415	+	protein_coding	F9G14.260	.
AT4G07735	AT4G07735	2.34111	1.28027	0.411489	0.758252	0.343108	0.69631	0.653733	0.901091	28719939	gene27777	NC_003075.7	13546626	13546881	256	-	lncRNA	.	Natural antisense transcript overlaps with AT4G26970
[truncated: 36,346 more rows]
